# Supplementary material for: Proteomic analysis of intestinal tissues from mice fed with Lentinula edodes-derived polysaccharides
Source: Royal Society of Chemistry journal article supplement (doi:10.1039/c5fo00904a), 2015-09-08
Supplement: c5fo00904a1.pdf [file c5fo00904a1.pdf]

**MASCOT**  
**SCIENCE** Mascot Search Results

User :  
Email :  
Search title : Auto submitted by BioTools  
Database : SwissProt 57.15 (515203 sequences; 181334896 residues)  
Taxonomy : Mus. (16281 sequences)  
Timestamp : 20 May 2013 at 01:32:42 GMT  
Warning : A Peptide summary report will usually give a much clearer picture of MS/MS search results.  
Top Score : 201 for PDIA4\_MOUSE, Protein disulfide-isomerase A4 OS=Mus musculus GN=Pdia4 PE=1 SV=2

### Mascot Score Histogram

Protein score is  $-10 \cdot \log(P)$ , where P is the probability that the observed match is a random event.

Protein scores greater than 55 are significant ( $p < 0.05$ ).

Protein scores are derived from ions scores as a non-probabilistic basis for ranking protein hits.

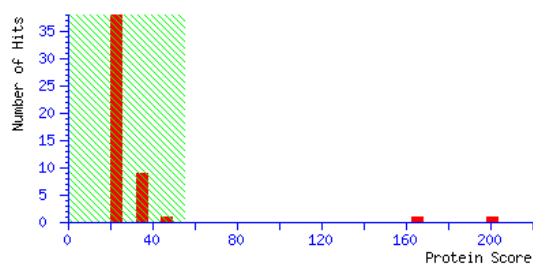

### Protein Summary Report

#### Index

| Accession                       | Mass   | Score | Description                                                              |
|---------------------------------|--------|-------|--------------------------------------------------------------------------|
| 1. <a href="#">PDIA4_MOUSE</a>  | 72271  | 201   | Protein disulfide-isomerase A4 OS=Mus musculus GN=Pdia4 PE=1 SV=2        |
| 2. <a href="#">MYH11_MOUSE</a>  | 227743 | 161   | Myosin-11 OS=Mus musculus GN=Myh11 PE=1 SV=1                             |
| 3. <a href="#">DIAP3_MOUSE</a>  | 134684 | 44    | Protein diaphanous homolog 3 OS=Mus musculus GN=Diaph3 PE=2 SV=1         |
| 4. <a href="#">CENPE_MOUSE</a>  | 287830 | 40    | Centromere-associated protein E OS=Mus musculus GN=Cenpe PE=1 SV=1       |
| 5. <a href="#">G6PD2_MOUSE</a>  | 59601  | 37    | Glucose-6-phosphate 1-dehydrogenase 2 OS=Mus musculus GN=G6pd2 PE=2 SV=3 |
| 6. <a href="#">AGO1_MOUSE</a>   | 98236  | 31    | Protein argonaute-1 OS=Mus musculus GN=Eif2c1 PE=1 SV=1                  |
| 7. <a href="#">KIF5A_MOUSE</a>  | 117745 | 31    | Kinesin heavy chain isoform 5A OS=Mus musculus GN=Kif5a PE=1 SV=3        |
| 8. <a href="#">IGSF2_MOUSE</a>  | 115331 | 31    | Immunoglobulin superfamily member 2 OS=Mus musculus GN=Cd101 PE=2 SV=1   |
| 9. <a href="#">CA194_MOUSE</a>  | 18977  | 31    | Uncharacterized protein C1orf194 homolog OS=Mus musculus PE=2 SV=1       |
| 10. <a href="#">K1C42_MOUSE</a> | 50444  | 31    | Keratin, type I cytoskeletal 42 OS=Mus musculus GN=Krt42 PE=1 SV=1       |

#### Results List

1. [PDIA4\\_MOUSE](#) Mass: 72271 Score: 201 Expect: 1.3e-016 Matches: 13

Protein disulfide-isomerase A4 OS=Mus musculus GN=Pdia4 PE=1 SV=2

| Observed  | Mr(expt)  | Mr(calc)  | ppm   | Start | End   | Miss | Ions | Peptide                           |
|-----------|-----------|-----------|-------|-------|-------|------|------|-----------------------------------|
| 1131.6385 | 1130.6312 | 1130.5832 | 42.4  | 606   | - 615 | 1    | ---  | K.NPIKFEGGNR.D                    |
| 1178.6233 | 1177.6160 | 1177.5629 | 45.1  | 254   | - 263 | 0    | 48   | K.GRPFDYNGPR.E                    |
| 1282.7234 | 1281.7161 | 1281.6717 | 34.6  | 239   | - 249 | 1    | 30   | K.RFDVSGYPTLKI                    |
| 1306.7133 | 1305.7060 | 1305.6639 | 32.3  | 527   | - 537 | 1    | ---  | K.TFDAIVMDPKK.D + Acetyl (N-term) |
| 1313.7090 | 1312.7017 | 1312.6564 | 34.5  | 329   | - 339 | 0    | ---  | K.FHHTFSPEIAK.F                   |
| 1501.7919 | 1500.7846 | 1500.7321 | 35.0  | 610   | - 622 | 1    | ---  | K.FEGGNRDLEHLSK.F                 |
| 1542.8306 | 1541.8233 | 1541.8242 | -0.59 | 240   | - 252 | 1    | ---  | R.FDVSGYPTLKIFR.K                 |
| 1686.7837 | 1685.7764 | 1685.7243 | 30.9  | 479   | - 492 | 0    | 74   | K.FAMEPEEFSDTLR.E                 |
| 1755.9363 | 1754.9290 | 1754.8879 | 23.4  | 590   | - 605 | 1    | ---  | K.VEGFPTIYFAPSGDKK.N              |
| 1783.9123 | 1782.9050 | 1782.8498 | 30.9  | 266   | - 281 | 0    | ---  | K.YGIVDYMIEQSGPPSK.E              |
| 1848.9479 | 1847.9406 | 1847.8842 | 30.5  | 325   | - 339 | 1    | ---  | R.EDYKFHHTFSPEIAK.F               |
| 2125.1398 | 2124.1325 | 2124.0680 | 30.4  | 405   | - 421 | 0    | ---  | K.RPLVVVYYSVDFSDYR.A              |
| 2509.2482 | 2508.2409 | 2508.1519 | 35.5  | 479   | - 499 | 1    | ---  | K.FAMEPEEFSDTLREFVTAFK.K          |

**No match to:** 804.4492, 826.4234, 832.4631, 848.4022, 1067.5555, 1116.6465, 1128.6199, 1148.6414, 1164.0126, 1195.6317, 1198.7511, 1335.7076, 1347.6645, 1470.8558, 1516.7607, 1556.8506, 1570.8644, 1598.9730, 1629.8798, 1701.7970, 1714.8275, 1723.6200, 1724.6029, 1727.8389, 1745.5866, 1773.9612, 1777.9562, 1790.9478, 1805.9222, 1818.9186, 1858.0026, 1902.0480, 1913.0184, 2003.0379, 2017.0528, 2039.0068, 2146.1285, 2175.1341, 2303.2357, 2374.1478, 2451.1595, 2691.3565

2. MYH11\_MOUSE Mass: 227743 Score: 161 Expect: 1.3e-012 Matches: 23

Myosin-11 OS=Mus musculus GN=Myh11 PE=1 SV=1

| Observed  | Mr(expt)  | Mr(calc)  | ppm    | Start | End    | Miss | Ions | Peptide                                           |
|-----------|-----------|-----------|--------|-------|--------|------|------|---------------------------------------------------|
| 826.4234  | 825.4161  | 825.3942  | 26.5   | 138   | - 143  | 0    | ---  | K.IVDMYK.G + Acetyl (N-term); Oxidation (M)       |
| 1306.7133 | 1305.7060 | 1305.6499 | 42.9   | 1650  | - 1659 | 1    | ---  | K.LQAQMKDFQR.E + Acetyl (N-term)                  |
| 1335.7076 | 1334.7004 | 1334.7129 | -9.37  | 818   | - 828  | 1    | ---  | K.VIQRNCAAYLK.L                                   |
| 1347.6645 | 1346.6573 | 1346.6718 | -10.76 | 415   | - 426  | 0    | ---  | K.EQADFAIEALAK.A + Acetyl (N-term)                |
| 1470.8558 | 1469.8485 | 1469.8089 | 26.9   | 1851  | - 1862 | 1    | ---  | K.LKEVLLQVEDER.K                                  |
| 1501.7919 | 1500.7846 | 1500.8082 | -15.72 | 810   | - 821  | 1    | ---  | R.QQQLTAMKVIQR.N + Acetyl (N-term); Oxidation (M) |
| 1516.7607 | 1515.7534 | 1515.6801 | 48.4   | 1579  | - 1590 | 1    | ---  | R.DLQARDEQNEEK.R + Acetyl (N-term)                |
| 1542.8306 | 1541.8233 | 1541.7685 | 35.5   | 1823  | - 1835 | 0    | 39   | K.IAQLEEVEQEAR.E                                  |
| 1556.8506 | 1555.8434 | 1555.8093 | 21.9   | 55    | - 68   | 1    | ---  | K.GDEVVVELVENGKK.V + Acetyl (N-term)              |
| 1570.8644 | 1569.8571 | 1569.8184 | 24.6   | 1032  | - 1044 | 1    | ---  | K.HESMISELEVRLK.K                                 |
| 1629.8798 | 1628.8725 | 1628.8257 | 28.8   | 1491  | - 1504 | 1    | ---  | R.ALEEALAKEELER.T                                 |
| 1686.7837 | 1685.7764 | 1685.8584 | -48.64 | 1227  | - 1241 | 1    | ---  | K.QTLEKENADLAGELR.V                               |
| 1773.9612 | 1772.9539 | 1772.8904 | 35.8   | 1762  | - 1777 | 0    | ---  | K.ATLQAEQLSNELATER.S                              |
| 1777.9562 | 1776.9489 | 1776.9008 | 27.1   | 130   | - 143  | 1    | ---  | K.YLPIYSEKIVDMYK.G + Oxidation (M)                |
| 1818.9186 | 1817.9113 | 1817.8894 | 12.1   | 1008  | - 1023 | 1    | ---  | R.VSDLTTNLAEEEEKAK.N + Acetyl (N-term)            |
| 1858.0026 | 1856.9953 | 1856.9731 | 12.0   | 1622  | - 1638 | 1    | ---  | K.LEGDLKDLELQADSAIK.G                             |
| 1902.0480 | 1901.0407 | 1900.9854 | 29.1   | 1761  | - 1777 | 1    | ---  | R.KATLQAEQLSNELATER.S                             |
| 1913.0184 | 1912.0111 | 1911.9538 | 30.0   | 1425  | - 1440 | 0    | 74   | R.LQQELDDLVDLDNR.Q                                |
| 2003.0379 | 2002.0306 | 2001.9677 | 31.4   | 1684  | - 1701 | 0    | ---  | K.SLEADMLQLQEDLAAAER.A                            |
| 2125.1398 | 2124.1325 | 2124.0442 | 41.6   | 625   | - 644  | 1    | ---  | R.IVGLDQMAKMTESLPSASKT + 2 Oxidation (M)          |
| 2175.1341 | 2174.1268 | 2174.0702 | 26.0   | 1705  | - 1724 | 1    | ---  | K.QADLEKEELAEELASSLSGR.N                          |

2451.1595 2450.1523 2450.0577 38.6 1738 - 1758 0 --- R.IAQLLEEELEEEQGNMEAMSDR.V  
 2509.2482 2508.2409 2508.2107 12.0 483 - 501 0 --- K.LQQLFNHTMFILEQEEYQR.E + Acetyl (N-term)  
**No match to:** 804.4492, 832.4631, 848.4022, 1067.5555, 1116.6465, 1128.6199, 1131.6385, 1148.6414, 1164.0126, 1178.6233, 1195.6317, 1198.7511, 1282.7234, 1313.7090, 1598.9730, 1701.7970, 1714.8275, 1723.6200, 1724.6029, 1727.8389, 1745.5866, 1755.9363, 1783.9123, 1790.9478, 1805.9222, 1848.9479, 2017.0528, 2039.0068, 2146.1285, 2303.2357, 2374.1478, 2691.3565

**3. DIAP3\_MOUSE Mass: 134684 Score: 44 Expect: 0.62 Matches: 19**

Protein diaphanous homolog 3 OS=Mus musculus GN=Diaph3 PE=2 SV=1

| Observed                                                                                                                                                                                                                                                                                                                                                                                                                      | Mr(expt)  | Mr(calc)  | ppm    | Start | End  | Miss | Ions | Peptide                                                          |
|-------------------------------------------------------------------------------------------------------------------------------------------------------------------------------------------------------------------------------------------------------------------------------------------------------------------------------------------------------------------------------------------------------------------------------|-----------|-----------|--------|-------|------|------|------|------------------------------------------------------------------|
| 804.4492                                                                                                                                                                                                                                                                                                                                                                                                                      | 803.4419  | 803.4025  | 49.1   | 999   | 1005 | 1    | ---  | R.EAAEKEK.R                                                      |
| 832.4631                                                                                                                                                                                                                                                                                                                                                                                                                      | 831.4559  | 831.4385  | 20.9   | 900   | 906  | 1    | ---  | K.NVKQMGR.Q                                                      |
| 848.4022                                                                                                                                                                                                                                                                                                                                                                                                                      | 847.3950  | 847.4334  | -45.37 | 900   | 906  | 1    | ---  | K.NVKQMGR.Q + Oxidation (M)                                      |
| 1067.5555                                                                                                                                                                                                                                                                                                                                                                                                                     | 1066.5483 | 1066.5811 | -30.82 | 302   | 310  | 0    | ---  | R.FFSIVEGLR.H                                                    |
| 1128.6199                                                                                                                                                                                                                                                                                                                                                                                                                     | 1127.6126 | 1127.6451 | -28.80 | 65    | 73   | 0    | ---  | <u>K</u> .ERPPLPHLK.T + Acetyl (N-term)                          |
| 1178.6233                                                                                                                                                                                                                                                                                                                                                                                                                     | 1177.6160 | 1177.5801 | 30.5   | 618   | 626  | 0    | ---  | <u>K</u> .EFKPEISMR.R + Acetyl (N-term)                          |
| 1282.7234                                                                                                                                                                                                                                                                                                                                                                                                                     | 1281.7161 | 1281.6976 | 14.5   | 221   | 230  | 1    | ---  | K.TQHKVIQCLR.A                                                   |
| 1306.7133                                                                                                                                                                                                                                                                                                                                                                                                                     | 1305.7060 | 1305.6751 | 23.7   | 617   | 626  | 1    | ---  | <u>K</u> .KEFKPEISMR.R + Acetyl (N-term)                         |
| 1313.7090                                                                                                                                                                                                                                                                                                                                                                                                                     | 1312.7017 | 1312.7350 | -25.38 | 358   | 369  | 1    | ---  | K.GIKNDGLDIQLK.V                                                 |
| 1470.8558                                                                                                                                                                                                                                                                                                                                                                                                                     | 1469.8485 | 1469.8024 | 31.3   | 1069  | 1081 | 0    | ---  | R.QSLPMSQRPVLK.V                                                 |
| 1542.8306                                                                                                                                                                                                                                                                                                                                                                                                                     | 1541.8233 | 1541.7581 | 42.3   | 131   | 143  | 1    | ---  | K.KEMVMQYINTASK.T                                                |
| 1701.7970                                                                                                                                                                                                                                                                                                                                                                                                                     | 1700.7897 | 1700.8048 | -8.87  | 255   | 269  | 1    | ---  | <u>K</u> .AMDPRQPAMMADVVK.L + Acetyl (N-term)                    |
| 1773.9612                                                                                                                                                                                                                                                                                                                                                                                                                     | 1772.9539 | 1772.9308 | 13.0   | 513   | 527  | 1    | ---  | R.EAKINELQAELQAFK.S + Acetyl (N-term)                            |
| 1858.0026                                                                                                                                                                                                                                                                                                                                                                                                                     | 1856.9953 | 1856.9057 | 48.2   | 970   | 984  | 1    | ---  | K.KVSVVEEFFNDLNNFR.T                                             |
| 1902.0480                                                                                                                                                                                                                                                                                                                                                                                                                     | 1901.0407 | 1901.0887 | -25.21 | 412   | 427  | 0    | ---  | R.AEGHFLSIQHLLLR.N + Acetyl (N-term)                             |
| 1913.0184                                                                                                                                                                                                                                                                                                                                                                                                                     | 1912.0111 | 1912.0200 | -4.66  | 1066  | 1081 | 1    | ---  | <u>K</u> .DIRQSLPMSQRPVLK.V + Acetyl (N-term); Oxidation (M)     |
| 2003.0379                                                                                                                                                                                                                                                                                                                                                                                                                     | 2002.0306 | 2001.9499 | 40.3   | 132   | 148  | 1    | ---  | <u>K</u> .EMVMQYINTASKTGSLR.S + Acetyl (N-term); 2 Oxidation (M) |
| 2451.1595                                                                                                                                                                                                                                                                                                                                                                                                                     | 2450.1523 | 2450.2284 | -31.07 | 718   | 738  | 0    | ---  | R.TMILEVDETQLSESMIQLIK.H + Oxidation (M)                         |
| 2509.2482                                                                                                                                                                                                                                                                                                                                                                                                                     | 2508.2409 | 2508.2339 | 2.81   | 718   | 738  | 0    | ---  | R.TMILEVDETQLSESMIQLIK.H + Acetyl (N-term); 2 Oxidation (M)      |
| <b>No match to:</b> 826.4234, 1116.6465, 1131.6385, 1148.6414, 1164.0126, 1195.6317, 1198.7511, 1335.7076, 1347.6645, 1501.7919, 1516.7607, 1556.8506, 1570.8644, 1598.9730, 1629.8798, 1686.7837, 1714.8275, 1723.6200, 1724.6029, 1727.8389, 1745.5866, 1755.9363, 1777.9562, 1783.9123, 1790.9478, 1805.9222, 1818.9186, 1848.9479, 2017.0528, 2039.0068, 2125.1398, 2146.1285, 2175.1341, 2303.2357, 2374.1478, 2691.3565 |           |           |        |       |      |      |      |                                                                  |

**4. CENPE\_MOUSE Mass: 287830 Score: 40 Expect: 1.6 Matches: 27**

Centromere-associated protein E OS=Mus musculus GN=Cenpe PE=1 SV=1

| Observed  | Mr(expt)  | Mr(calc)  | ppm    | Start | End  | Miss | Ions | Peptide                                 |
|-----------|-----------|-----------|--------|-------|------|------|------|-----------------------------------------|
| 804.4492  | 803.4419  | 803.4177  | 30.1   | 181   | 187  | 0    | ---  | K.WLATGEK.N                             |
| 826.4234  | 825.4161  | 825.4531  | -44.78 | 1773  | 1779 | 0    | ---  | R.IAHMNLK.E                             |
| 832.4631  | 831.4559  | 831.4338  | 26.6   | 649   | 655  | 0    | ---  | R.SENLELK.E                             |
| 1128.6199 | 1127.6126 | 1127.6550 | -37.56 | 843   | 852  | 1    | ---  | R.LKQEIGALSK.E + Acetyl (N-term)        |
| 1131.6385 | 1130.6312 | 1130.5931 | 33.7   | 1817  | 1825 | 1    | ---  | <u>K</u> .VQELKTSER.Q + Acetyl (N-term) |
| 1178.6233 | 1177.6160 | 1177.5914 | 20.9   | 252   | 260  | 1    | ---  | R.LKEGCFINR.N + Acetyl (N-term)         |
| 1195.6317 | 1194.6244 | 1194.6105 | 11.6   | 833   | 842  | 1    | ---  | R.HAGVLEERER.L                          |
| 1282.7234 | 1281.7161 | 1281.7193 | -2.51  | 109   | 118  | 1    | 1    | R.AIHDIFQRIK.K + Acetyl (N-term)        |

|           |           |           |        |             |   |     |                                                     |
|-----------|-----------|-----------|--------|-------------|---|-----|-----------------------------------------------------|
| 1313.7090 | 1312.7017 | 1312.7350 | -25.36 | 711 - 721   | 1 | --- | <u>K</u> .GLLSNLELEKR.I + Acetyl (N-term)           |
| 1335.7076 | 1334.7004 | 1334.6718 | 21.4   | 1241 - 1250 | 0 | --- | <u>K</u> .EYQEITELR.G + Acetyl (N-term)             |
| 1347.6645 | 1346.6573 | 1346.7081 | -37.78 | 692 - 702   | 0 | --- | <u>K</u> .ELQLAFQEISK.L + Acetyl (N-term)           |
| 1501.7919 | 1500.7846 | 1500.8082 | -15.70 | 149 - 160   | 1 | --- | K.MKPLIREDTNR.T + Oxidation (M)                     |
| 1516.7607 | 1515.7534 | 1515.7537 | -0.21  | 975 - 986   | 1 | --- | K.QHQETINMLKMK.A + Oxidation (M)                    |
| 1542.8306 | 1541.8233 | 1541.7694 | 35.0   | 975 - 986   | 1 | --- | <u>K</u> .QHQETINMLKMK.A + Acetyl (N-term)          |
| 1570.8644 | 1569.8571 | 1569.8726 | -9.85  | 1716 - 1728 | 1 | --- | K.LELTQQLNENLKK.I                                   |
| 1701.7970 | 1700.7897 | 1700.7862 | 2.08   | 550 - 563   | 0 | --- | R.DQEMQLMHEVSNLK.N                                  |
| 1727.8389 | 1726.8316 | 1726.7719 | 34.6   | 2142 - 2155 | 0 | --- | R.ITAMINESTEFEER.S + Acetyl (N-term); Oxidation (M) |
| 1755.9363 | 1754.9290 | 1754.8588 | 40.0   | 272 - 287   | 1 | --- | K.LSDGQVGGFINYRDSK.L                                |
| 1777.9562 | 1776.9489 | 1776.8907 | 32.8   | 2127 - 2141 | 1 | --- | K.ENKSIGLVNNFYHSR.I                                 |
| 1783.9123 | 1782.9050 | 1782.9013 | 2.09   | 1626 - 1640 | 0 | --- | R.VAHVHLEEHQETINK.L                                 |
| 1805.9222 | 1804.9149 | 1804.8843 | 17.0   | 331 - 346   | 0 | --- | K.NTPYVNEVSNDEALLK.R                                |
| 1848.9479 | 1847.9406 | 1847.9265 | 7.67   | 591 - 605   | 1 | --- | K.EEQIKNLQEYIDAQK.S                                 |
| 1913.0184 | 1912.0111 | 1912.0088 | 1.23   | 2258 - 2273 | 1 | 6   | K.ILSLKATVEHQEEMIR.L + Oxidation (M)                |
| 2017.0528 | 2016.0455 | 2015.9872 | 28.9   | 2203 - 2221 | 1 | --- | R.DSERPQAASGAEQLTSKNK.I                             |
| 2146.1285 | 2145.1212 | 2145.0922 | 13.5   | 1311 - 1329 | 1 | --- | R.TVHSMTEGIEIGNLRLTK.K + Oxidation (M)              |
| 2175.1341 | 2174.1268 | 2174.1252 | 0.73   | 1843 - 1861 | 1 | --- | K.EQGLTLSKIEMENLNLAQK.I + Oxidation (M)             |
| 2303.2357 | 2302.2284 | 2302.1290 | 43.2   | 161 - 180   | 0 | --- | R.TVYVSDLTTEEVVYAEMALK.W + Acetyl (N-term)          |

**No match to:** 848.4022, 1067.5555, 1116.6465, 1148.6414, 1164.0126, 1198.7511, 1306.7133, 1470.8558, 1556.8506, 1598.9730, 1629.8798, 1686.7837, 1714.8275, 1723.6200, 1724.6029, 1745.5866, 1773.9612, 1790.9478, 1818.9186, 1858.0026, 1902.0480, 2003.0379, 2039.0068, 2125.1398, 2374.1478, 2451.1595, 2509.2482, 2691.3565

**5. G6PD2\_MOUSE Mass: 59601 Score: 37 Expect: 3.5 Matches: 9**

Glucose-6-phosphate 1-dehydrogenase 2 OS=Mus musculus GN=G6pd2 PE=2 SV=3

| Observed  | Mr(expt)  | Mr(calc)  | ppm  | Start     | End | Miss | Ions | Peptide                                                          |
|-----------|-----------|-----------|------|-----------|-----|------|------|------------------------------------------------------------------|
| 1306.7133 | 1305.7060 | 1305.6421 | 49.0 | 206 - 215 | 0   | ---  |      | <u>K</u> .EMVQNLMLVLR.F + Acetyl (N-term); 2 Oxidation (M)       |
| 1501.7919 | 1500.7846 | 1500.7837 | 0.60 | 346 - 357 | 1   | ---  |      | K.NERWDGVPFILR.C                                                 |
| 1686.7837 | 1685.7764 | 1685.7463 | 17.9 | 394 - 407 | 0   | ---  |      | R.MQPNEAVYTTMMTK.K + Acetyl (N-term)                             |
| 1701.7970 | 1700.7897 | 1700.7247 | 38.2 | 153 - 166 | 0   | ---  |      | K.NIQETCMSQTGFNR.I + Oxidation (M)                               |
| 1755.9363 | 1754.9290 | 1754.9104 | 10.6 | 371 - 384 | 1   | ---  |      | R.LQFRDIPGDIFHQK.C + Acetyl (N-term)                             |
| 1790.9478 | 1789.9406 | 1789.8999 | 22.7 | 83 - 97   | 1   | ---  |      | K.QSEPFKATPEERPK.L                                               |
| 2175.1341 | 2174.1268 | 2174.0864 | 18.6 | 199 - 215 | 1   | ---  |      | R.IDHYLDKEMVQNLMLVLR.F + Acetyl (N-term); Oxidation (M)          |
| 2374.1478 | 2373.1405 | 2373.0835 | 24.0 | 408 - 427 | 0   | ---  |      | <u>K</u> .KPGMFFNPEEELDLTYGNK.Y + Acetyl (N-term); Oxidation (M) |
| 2509.2482 | 2508.2409 | 2508.2076 | 13.3 | 440 - 459 | 1   | ---  |      | R.LILDVFCGCMHFVRTDEL.R                                           |

**No match to:** 804.4492, 826.4234, 832.4631, 848.4022, 1067.5555, 1116.6465, 1128.6199, 1131.6385, 1148.6414, 1164.0126, 1178.6233, 1195.6317, 1198.7511, 1282.7234, 1313.7090, 1335.7076, 1347.6645, 1470.8558, 1516.7607, 1542.8306, 1556.8506, 1570.8644, 1598.9730, 1629.8798, 1714.8275, 1723.6200, 1724.6029, 1727.8389, 1745.5866, 1773.9612, 1777.9562, 1783.9123, 1805.9222, 1818.9186, 1848.9479, 1858.0026, 1902.0480, 1913.0184, 2003.0379, 2017.0528, 2039.0068, 2125.1398, 2146.1285, 2303.2357, 2451.1595, 2691.3565

**6. AGO1\_MOUSE Mass: 98236 Score: 31 Expect: 12 Matches: 10**

Protein argonaute-1 OS=Mus musculus GN=Ei2c1 PE=1 SV=1

| Observed  | Mr(expt)  | Mr(calc)  | ppm  | Start     | End | Miss | Ions | Peptide      |
|-----------|-----------|-----------|------|-----------|-----|------|------|--------------|
| 1067.5555 | 1066.5483 | 1066.5342 | 13.2 | 277 - 284 | 1   | ---  |      | K.YRVCNVTR.R |

1516.7607 1515.7534 1515.7140 26.0 424 - 436 0 --- R<sub>2</sub>AIATPNQGVWDMR.G + Acetyl (N-term); Oxidation (M)  
1701.7970 1700.7897 1700.8304 -23.94 424 - 438 1 --- R<sub>2</sub>AIATPNQGVWDMRGK.Q + Acetyl (N-term); Oxidation (M)  
1773.9612 1772.9539 1772.9454 4.76 549 - 564 1 --- K.NAVKTSPTLSNLCLK.I  
1777.9562 1776.9489 1776.8750 41.6 533 - 548 0 --- R<sub>2</sub>VGDTLLGMATQCVQVK.N + Acetyl (N-term); Oxidation (M)  
1848.9479 1847.9406 1847.8988 22.6 492 - 507 1 --- K.YAQGADSVPEPMFRHLK.N  
1858.0026 1856.9953 1857.0030 -4.13 553 - 568 1 --- K<sub>2</sub>TSPQTLNCLKINVK.L + Acetyl (N-term)  
2303.2357 2302.2284 2302.2321 -1.59 667 - 686 0 --- R<sub>2</sub>DGVPEGQLPQILHYELLAIR.D + Acetyl (N-term)  
2451.1595 2450.1523 2450.2594 -43.74 582 - 605 0 --- R.SAVFQQPVIFLGADVTHPPAGDGK.K  
2509.2482 2508.2409 2508.1378 41.1 813 - 835 1 --- R.YHLVDKEHDSGEGSHISGQSNR.D

**No match to:** 804.4492, 826.4234, 832.4631, 848.4022, 1116.6465, 1128.6199, 1131.6385, 1148.6414, 1164.0126, 1178.6233, 1195.6317, 1198.7511, 1282.7234, 1306.7133, 1313.7090, 1335.7076, 1347.6645, 1470.8558, 1501.7919, 1542.8306, 1556.8506, 1570.8644, 1598.9730, 1629.8798, 1686.7837, 1714.8275, 1723.6200, 1724.6029, 1727.8389, 1745.5866, 1755.9363, 1783.9123, 1790.9478, 1805.9222, 1818.9186, 1902.0480, 1913.0184, 2003.0379, 2017.0528, 2039.0068, 2125.1398, 2146.1285, 2175.1341, 2374.1478, 2691.3565

**7. KIF5A\_MOUSE** Mass: 117745 Score: 31 Expect: 12 Matches: 14

Kinesin heavy chain isoform 5A OS=Mus musculus GN=Ki5a PE=1 SV=3

| Observed  | Mr(expt)  | Mr(calc)  | ppm    | Start | End   | Miss | Ions | Peptide                                             |
|-----------|-----------|-----------|--------|-------|-------|------|------|-----------------------------------------------------|
| 826.4234  | 825.4161  | 825.4021  | 17.0   | 275   | - 280 | 0    | ---  | K <sub>2</sub> SYVPYR.D + Acetyl (N-term)           |
| 848.4022  | 847.3950  | 847.3923  | 3.14   | 502   | - 508 | 0    | ---  | K.SQEVEEK.S                                         |
| 1131.6385 | 1130.6312 | 1130.6118 | 17.2   | 547   | - 556 | 0    | ---  | R.IAEVLNGLMR.D + Oxidation (M)                      |
| 1178.6233 | 1177.6160 | 1177.6091 | 5.83   | 893   | - 901 | 1    | ---  | R.YQQEVDRIK.E                                       |
| 1313.7090 | 1312.7017 | 1312.7285 | -20.39 | 546   | - 556 | 1    | ---  | K <sub>2</sub> RIAEVLNGLMR.D + Acetyl (N-term)      |
| 1470.8558 | 1469.8485 | 1469.8089 | 26.9   | 733   | - 744 | 1    | ---  | K.DLNQKLQLELEK.L                                    |
| 1516.7607 | 1515.7534 | 1515.7780 | -16.24 | 239   | - 253 | 1    | ---  | K <sub>2</sub> VSKTGAEGAVLDEAK.N + Acetyl (N-term)  |
| 1629.8798 | 1628.8725 | 1628.8369 | 21.9   | 509   | - 522 | 0    | ---  | K.SQQNQLLVDELSQK.V                                  |
| 1701.7970 | 1700.7897 | 1700.7312 | 34.4   | 812   | - 827 | 0    | ---  | K.SAEMEPEDSGGIHSQK.Q                                |
| 1783.9123 | 1782.9050 | 1782.8253 | 44.7   | 605   | - 617 | 1    | ---  | R <sub>2</sub> CRQLENLQVECHR.K + Acetyl (N-term)    |
| 1818.9186 | 1817.9113 | 1817.8935 | 9.83   | 173   | - 188 | 0    | ---  | R <sub>2</sub> FVSSPEEILDVIDEGK.S + Acetyl (N-term) |
| 1902.0480 | 1901.0407 | 1900.9782 | 32.9   | 572   | - 588 | 0    | ---  | K <sub>2</sub> LPVEISGAIEEFTVAR.L + Acetyl (N-term) |
| 1913.0184 | 1912.0111 | 1911.9174 | 49.0   | 469   | - 485 | 1    | ---  | R.ELSHLQSENDAAKDEVK.E                               |
| 2691.3565 | 2690.3492 | 2690.3286 | 7.66   | 486   | - 508 | 1    | ---  | K.EVLQALEELAVNYDQKSQEVEEK.S                         |

**No match to:** 804.4492, 832.4631, 1067.5555, 1116.6465, 1128.6199, 1148.6414, 1164.0126, 1195.6317, 1198.7511, 1282.7234, 1306.7133, 1335.7076, 1347.6645, 1501.7919, 1542.8306, 1556.8506, 1570.8644, 1598.9730, 1686.7837, 1714.8275, 1723.6200, 1724.6029, 1727.8389, 1745.5866, 1755.9363, 1773.9612, 1777.9562, 1790.9478, 1805.9222, 1848.9479, 1858.0026, 2003.0379, 2017.0528, 2039.0068, 2125.1398, 2146.1285, 2175.1341, 2303.2357, 2374.1478, 2451.1595, 2509.2482

**8. IGSF2\_MOUSE** Mass: 115331 Score: 31 Expect: 13 Matches: 13

Immunoglobulin superfamily member 2 OS=Mus musculus GN=Cd101 PE=2 SV=1

| Observed  | Mr(expt)  | Mr(calc)  | ppm    | Start | End    | Miss | Ions | Peptide                                       |
|-----------|-----------|-----------|--------|-------|--------|------|------|-----------------------------------------------|
| 832.4631  | 831.4559  | 831.4425  | 16.0   | 1012  | - 1018 | 0    | ---  | K.ALWVGMR.K                                   |
| 1116.6465 | 1115.6392 | 1115.6550 | -14.12 | 1000  | - 1009 | 1    | ---  | K <sub>2</sub> LSQLSLSAKK.E + Acetyl (N-term) |
| 1131.6385 | 1130.6312 | 1130.5906 | 35.9   | 1010  | - 1018 | 1    | ---  | K <sub>2</sub> EKALWVGMR.K + Acetyl (N-term)  |
| 1178.6233 | 1177.6160 | 1177.6237 | -6.57  | 537   | - 546  | 1    | ---  | K.SSLRVNLMRSR.Q + Oxidation (M)               |
| 1306.7133 | 1305.7060 | 1305.6928 | 10.1   | 89    | - 98   | 1    | ---  | R <sub>2</sub> VQSKEIYIER.L + Acetyl (N-term) |

1347.6645 1346.6573 1346.6255 23.6 77 - 88 0 --- K.DAGFSYAVYAQR.V  
1542.8306 1541.8233 1541.7798 28.3 407 - 420 1 0 R\_EPAARSVTVSAEQR.T + Acetyl (N-term)  
1714.8275 1713.8202 1713.8475 -15.93 310 - 324 0 --- R\_DGNPQLQGVWFLNGK.E + Acetyl (N-term)  
1790.9478 1789.9406 1789.8893 28.6 939 - 953 1 --- K.WINQASGESQRMVLR.V + Oxidation (M)  
2039.0068 2037.9995 2038.0241 -12.06 547 - 563 0 --- R.QPQVMLAHTFHLSCVVV.R + Oxidation (M)  
2175.1341 2174.1268 2174.0698 26.2 571 - 589 0 --- K\_LPFSVTWQFQAGSGAFHR.L + Acetyl (N-term)  
2374.1478 2373.1405 2373.0940 19.6 494 - 514 1 --- R.LEIASAMVTDSGT YECRVSER.L  
2691.3565 2690.3492 2690.2507 36.6 34 - 57 1 --- R\_AEGYPVSIRCTVSGHQGPSTQDFR.W + Acetyl (N-term)

**No match to:** 804.4492, 826.4234, 848.4022, 1067.5555, 1128.6199, 1148.6414, 1164.0126, 1195.6317, 1198.7511, 1282.7234, 1313.7090, 1335.7076, 1470.8558, 1501.7919, 1516.7607, 1556.8506, 1570.8644, 1598.9730, 1629.8798, 1686.7837, 1701.7970, 1723.6200, 1724.6029, 1727.8389, 1745.5866, 1755.9363, 1773.9612, 1777.9562, 1783.9123, 1805.9222, 1818.9186, 1848.9479, 1858.0026, 1902.0480, 1913.0184, 2003.0379, 2017.0528, 2125.1398, 2146.1285, 2303.2357, 2451.1595, 2509.2482

**9. CA194\_MOUSE** Mass: 18977 Score: 31 Expect: 14 Matches: 5

Uncharacterized protein C1orf194 homolog OS=Mus musculus PE=2 SV=1

**Observed Mr(expt) Mr(calc) ppm Start End Miss Ions Peptide**

1067.5555 1066.5483 1066.5560 -7.22 19 - 27 0 --- K\_HLGNLWASK.K + Acetyl (N-term)  
1195.6317 1194.6244 1194.6509 -22.18 19 - 28 1 --- K\_HLGNLWASKK.S + Acetyl (N-term)  
1542.8306 1541.8233 1541.7838 25.6 2 - 14 0 --- M\_LQPQETFSNPALR.D + Acetyl (N-term)  
1714.8275 1713.8202 1713.8951 -43.69 75 - 89 1 --- R.LATLYNHHTGAFKNK.T  
2691.3565 2690.3492 2690.3161 12.3 33 - 56 1 --- K\_NPAHLAQQDPWSRLSSTPTATSR.S + Acetyl (N-term)

**No match to:** 804.4492, 826.4234, 832.4631, 848.4022, 1116.6465, 1128.6199, 1131.6385, 1148.6414, 1164.0126, 1178.6233, 1198.7511, 1282.7234, 1306.7133, 1313.7090, 1335.7076, 1347.6645, 1470.8558, 1501.7919, 1516.7607, 1556.8506, 1570.8644, 1598.9730, 1629.8798, 1686.7837, 1701.7970, 1723.6200, 1724.6029, 1727.8389, 1745.5866, 1755.9363, 1773.9612, 1777.9562, 1783.9123, 1790.9478, 1805.9222, 1818.9186, 1848.9479, 1858.0026, 1902.0480, 1913.0184, 2003.0379, 2017.0528, 2039.0068, 2125.1398, 2146.1285, 2175.1341, 2303.2357, 2374.1478, 2451.1595, 2509.2482

**10. K1C42\_MOUSE** Mass: 50444 Score: 31 Expect: 14 Matches: 8

Keratin, type I cytoskeletal 42 OS=Mus musculus GN=Krt42 PE=1 SV=1

**Observed Mr(expt) Mr(calc) ppm Start End Miss Ions Peptide**

1148.6414 1147.6341 1147.6349 -0.74 105 - 113 1 --- R\_LATYLDVRV.A + Acetyl (N-term)  
1178.6233 1177.6160 1177.5874 24.3 420 - 429 1 --- R.EGMVTSRQVR.T + Oxidation (M)  
1542.8306 1541.8233 1541.8049 11.9 427 - 439 1 --- R\_QVRTIVEEVQDGK.V + Acetyl (N-term)  
1556.8506 1555.8434 1555.8205 14.7 112 - 125 1 --- R.VRALEEANADLEVK.I  
1570.8644 1569.8571 1569.8362 13.3 114 - 127 1 --- R.ALEEANADLEVKIR.E  
1773.9612 1772.9539 1772.8727 45.8 1 - 17 1 --- -.MASTTSVRQFSTSGSVK.G  
2003.0379 2002.0306 2002.0517 -10.53 315 - 331 1 --- R.RSVQNLEIELQSLSMK.A  
2303.2357 2302.2284 2302.2090 8.46 203 - 222 1 --- R.VLDELTLARADLEMQIESLK.E + Oxidation (M)

**No match to:** 804.4492, 826.4234, 832.4631, 848.4022, 1067.5555, 1116.6465, 1128.6199, 1131.6385, 1164.0126, 1195.6317, 1198.7511, 1282.7234, 1306.7133, 1313.7090, 1335.7076, 1347.6645, 1470.8558, 1501.7919, 1516.7607, 1598.9730, 1629.8798, 1686.7837, 1701.7970, 1714.8275, 1723.6200, 1724.6029, 1727.8389, 1745.5866, 1755.9363, 1777.9562, 1783.9123, 1790.9478, 1805.9222, 1818.9186, 1848.9479, 1858.0026, 1902.0480, 1913.0184, 2017.0528, 2039.0068, 2125.1398, 2146.1285, 2175.1341, 2374.1478, 2451.1595, 2509.2482, 2691.3565

**Search Parameters**

Type of search : MS/MS Ion Search  
Enzyme : Trypsin  
Fixed modifications : Carbamidomethyl (C)  
Variable modifications : Acetyl (N-term), Oxidation (M)  
Mass values : Monoisotopic  
Protein Mass : Unrestricted  
Peptide Mass Tolerance :  $\pm 50$  ppm  
Fragment Mass Tolerance:  $\pm 0.5$  Da  
Max Missed Cleavages : 1  
Instrument type : MALDI-TOF-TOF  
Query1 (804.4492,1+) : <no title>  
Query2 (826.4234,1+) : <no title>  
Query3 (832.4631,1+) : <no title>  
Query4 (848.4022,1+) : <no title>  
Query5 (1067.5555,1+) : <no title>  
Query6 (1116.6465,1+) : <no title>  
Query7 (1128.6199,1+) : <no title>  
Query8 (1131.6385,1+) : <no title>  
Query9 (1148.6414,1+) : <no title>  
Query10 (1164.0126,1+) : <no title>  
Query11 (1178.6233,1+) : <no title>  
Query12 (1195.6317,1+) : <no title>  
Query13 (1198.7511,1+) : <no title>  
Query14 (1282.7234,1+) : <no title>  
Query15 (1306.7133,1+) : <no title>  
Query16 (1313.7090,1+) : <no title>  
Query17 (1335.7076,1+) : <no title>  
Query18 (1347.6645,1+) : <no title>  
Query19 (1470.8558,1+) : <no title>  
Query20 (1501.7919,1+) : <no title>  
Query21 (1516.7607,1+) : <no title>  
Query22 (1542.8306,1+) : <no title>  
Query23 (1556.8506,1+) : <no title>  
Query24 (1570.8644,1+) : <no title>  
Query25 (1598.9730,1+) : <no title>  
Query26 (1629.8798,1+) : <no title>  
Query27 (1686.7837,1+) : <no title>  
Query28 (1701.7970,1+) : <no title>  
Query29 (1714.8275,1+) : <no title>  
Query30 (1723.6200,1+) : <no title>  
Query31 (1724.6029,1+) : <no title>  
Query32 (1727.8389,1+) : <no title>  
Query33 (1745.5866,1+) : <no title>  
Query34 (1755.9363,1+) : <no title>

Query35 (1773.9612,1+) : <no title>  
Query36 (1777.9562,1+) : <no title>  
Query37 (1783.9123,1+) : <no title>  
Query38 (1790.9478,1+) : <no title>  
Query39 (1805.9222,1+) : <no title>  
Query40 (1818.9186,1+) : <no title>  
Query41 (1848.9479,1+) : <no title>  
Query42 (1858.0026,1+) : <no title>  
Query43 (1902.0480,1+) : <no title>  
Query44 (1913.0184,1+) : <no title>  
Query45 (2003.0379,1+) : <no title>  
Query46 (2017.0528,1+) : <no title>  
Query47 (2039.0068,1+) : <no title>  
Query48 (2125.1398,1+) : <no title>  
Query49 (2146.1285,1+) : <no title>  
Query50 (2175.1341,1+) : <no title>  
Query51 (2303.2357,1+) : <no title>  
Query52 (2374.1478,1+) : <no title>  
Query53 (2451.1595,1+) : <no title>  
Query54 (2509.2482,1+) : <no title>  
Query55 (2691.3565,1+) : <no title>

Mascot: <http://www.matrixscience.com/>

***MATRIX***  
***SCIENCE*** Mascot Search Results

User :  
Email :  
Search title : Auto submitted by BioTools  
Database : SwissProt 57.15 (515203 sequences; 181334896 residues)  
Taxonomy : Mus. (16281 sequences)  
Timestamp : 20 May 2013 at 01:32:50 GMT  
Warning : A Peptide summary report will usually give a much clearer picture of MS/MS search results.  
Top Score : 120for HS71A\_MOUSE, Heat shock 70 kDa protein 1A OS=Mus musculus GN=Hspa1a PE=1 SV=2

**Mascot Score Histogram**

Protein score is  $-10 \cdot \log(P)$ , where P is the probability that the observed match is a random event.

Protein scores greater than 55 are significant ( $p < 0.05$ ).

Protein scores are derived from ions scores as a non-probabilistic basis for ranking protein hits.



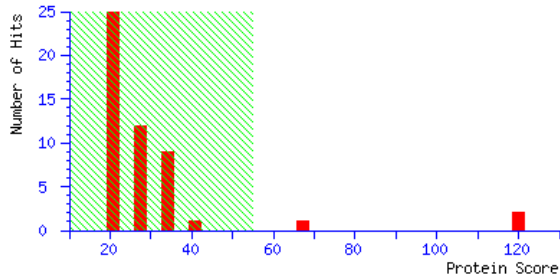

## Protein Summary Report

### Index

| Accession                             | Mass   | Score | Description                                                                             |
|---------------------------------------|--------|-------|-----------------------------------------------------------------------------------------|
| <a href="#">1. <u>HS71A_MOUSE</u></a> | 70321  | 120   | Heat shock 70 kDa protein 1A OS=Mus musculus GN=Hspa1a PE=1 SV=2                        |
| <a href="#">2. <u>HS71B_MOUSE</u></a> | 70418  | 119   | Heat shock 70 kDa protein 1B OS=Mus musculus GN=Hspa1b PE=1 SV=3                        |
| <a href="#">3. <u>HS71L_MOUSE</u></a> | 70992  | 66    | Heat shock 70 kDa protein 1-like OS=Mus musculus GN=Hspa1l PE=2 SV=4                    |
| <a href="#">4. <u>USS1_MOUSE</u></a>  | 110261 | 41    | 116 kDa U5 small nuclear ribonucleoprotein component OS=Mus musculus GN=Efud2 PE=2 SV=1 |
| <a href="#">5. <u>ECHA_MOUSE</u></a>  | 83302  | 37    | Trifunctional enzyme subunit alpha, mitochondrial OS=Mus musculus GN=Hadha PE=1 SV=1    |
| <a href="#">6. <u>TARA_MOUSE</u></a>  | 225171 | 36    | TRIO and F-actin-binding protein OS=Mus musculus GN=Triobp PE=1 SV=3                    |
| <a href="#">7. <u>HSP7C_MOUSE</u></a> | 71055  | 34    | Heat shock cognate 71 kDa protein OS=Mus musculus GN=Hspa8 PE=1 SV=1                    |
| <a href="#">8. <u>PARVG_MOUSE</u></a> | 37610  | 34    | Gamma-parvin OS=Mus musculus GN=Parvg PE=1 SV=1                                         |
| <a href="#">9. <u>TTC23_MOUSE</u></a> | 55372  | 32    | Tetratricopeptide repeat protein 23 OS=Mus musculus GN=Ttc23 PE=2 SV=1                  |
| <a href="#">10. <u>NRAP_MOUSE</u></a> | 196735 | 32    | Nebulin-related-anchoring protein OS=Mus musculus GN=Nrap PE=1 SV=2                     |

### Results List

1. [HS71A\\_MOUSE](#) **Mass:** 70321 **Score:** 120 **Expect:** 1.6e-008 **Matches:** 13

Heat shock 70 kDa protein 1A OS=Mus musculus GN=Hspa1a PE=1 SV=2

**Observed Mr(expt) Mr(calc) ppm Start End Miss Ions Peptide**

|           |           |           |        |           |   |     |                                 |
|-----------|-----------|-----------|--------|-----------|---|-----|---------------------------------|
| 804.4262  | 803.4190  | 803.4389  | -24.78 | 501 - 507 | 0 | --- | K.ITIITNDK.G                    |
| 832.4582  | 831.4509  | 831.4450  | 7.13   | 251 - 257 | 1 | --- | K.KDISQNK.R                     |
| 1109.6245 | 1108.6173 | 1108.5665 | 45.8   | 349 - 357 | 0 | --- | K.LLQDFNNGR.D                   |
| 1183.6895 | 1182.6822 | 1182.6397 | 36.0   | 459 - 469 | 0 | --- | R.FELSGIPPAPR.G                 |
| 1197.7358 | 1196.7286 | 1196.6877 | 34.1   | 160 - 171 | 0 | --- | K.DAGVIAGLNVLR.I                |
| 1390.7797 | 1389.7725 | 1389.7405 | 23.0   | 237 - 247 | 1 | --- | R.LVSHFVEEFKR.K                 |
| 1465.8545 | 1464.8472 | 1464.8049 | 28.9   | 329 - 342 | 0 | --- | K.AQIHDLVLVGGSTR.I              |
| 1487.7390 | 1486.7317 | 1486.6940 | 25.3   | 37 - 49   | 0 | 7   | R.TTPSYVAFTDTER.L               |
| 1542.7924 | 1541.7851 | 1541.7296 | 36.0   | 300 - 311 | 1 | --- | R.ARFEELCSDLFR.G                |
| 1675.7697 | 1674.7625 | 1674.7234 | 23.3   | 221 - 236 | 0 | --- | K.ATAGDTHLGGEDFDNR.L            |
| 1687.9394 | 1686.9321 | 1686.8940 | 22.6   | 172 - 187 | 0 | 14  | R.IINEPTAAAIAYGLDR.T            |
| 2774.3263 | 2773.3190 | 2773.3195 | -0.20  | 424 - 447 | 0 | --- | K.QTQIFFTYSDNQPGVLIQVYEGER.A    |
| 2981.4769 | 2980.4696 | 2980.4553 | 4.79   | 273 - 299 | 0 | --- | R.TLSSSTQASLEIDSLFEGIDFYTSITR.A |

**No match to:** 1110.6181, 1210.6660, 1428.7622, 1480.8111, 1502.7816, 1552.8628, 1592.9945, 1653.8659, 1710.9420, 1751.9679, 1776.9783, 1782.9238, 1982.0462, 2691.2918

2. HS71B\_MOUSE Mass: 70418 Score: 119 Expect: 2e-008 Matches: 13

Heat shock 70 kDa protein 1B OS=Mus musculus GN=Hspa1b PE=1 SV=3

| Observed  | Mr(expt)  | Mr(calc)  | ppm    | Start | End | Miss | Ions | Peptide                         |
|-----------|-----------|-----------|--------|-------|-----|------|------|---------------------------------|
| 804.4262  | 803.4190  | 803.4389  | -24.78 | 501   | 507 | 0    | ---  | K.ITIINDK.G                     |
| 832.4582  | 831.4509  | 831.4450  | 7.13   | 251   | 257 | 1    | ---  | K.KDISQNK.R                     |
| 1109.6245 | 1108.6173 | 1108.5665 | 45.8   | 349   | 357 | 0    | ---  | K.LLQDFNNGR.D                   |
| 1183.6895 | 1182.6822 | 1182.6397 | 36.0   | 459   | 469 | 0    | ---  | R.FELSGIPPAPR.G                 |
| 1197.7358 | 1196.7286 | 1196.6877 | 34.1   | 160   | 171 | 0    | ---  | K.DAGVIAGLNVL.R                 |
| 1390.7797 | 1389.7725 | 1389.7405 | 23.0   | 237   | 247 | 1    | ---  | R.LVSHFVEEFKR.K                 |
| 1465.8545 | 1464.8472 | 1464.8049 | 28.9   | 329   | 342 | 0    | ---  | K.AQIHDLVLVGGSTR.I              |
| 1487.7390 | 1486.7317 | 1486.6940 | 25.3   | 37    | 49  | 0    | 7    | R.TTPSYVAFTDTER.L               |
| 1542.7924 | 1541.7851 | 1541.7296 | 36.0   | 300   | 311 | 1    | ---  | R.ARFEELCSDLFR.G                |
| 1675.7697 | 1674.7625 | 1674.7234 | 23.3   | 221   | 236 | 0    | ---  | K.ATAGDTHLGGEDFDNR.L            |
| 1687.9394 | 1686.9321 | 1686.8940 | 22.6   | 172   | 187 | 0    | 14   | R.IINEPTAAAIAYGLDR.T            |
| 2774.3263 | 2773.3190 | 2773.3195 | -0.20  | 424   | 447 | 0    | ---  | K.QTQIFTTYSNQPGLVLIQVYEGEER.A   |
| 2981.4769 | 2980.4696 | 2980.4553 | 4.79   | 273   | 299 | 0    | ---  | R.TLSSSTQASLEIDSLFEGIDFYTSITR.A |

No match to: 1110.6181, 1210.6660, 1428.7622, 1480.8111, 1502.7816, 1552.8628, 1592.9945, 1653.8659, 1710.9420, 1751.9679, 1776.9783, 1782.9238, 1982.0462, 2691.2918

3. HS71L\_MOUSE Mass: 70992 Score: 66 Expect: 0.0045 Matches: 10

Heat shock 70 kDa protein 1-like OS=Mus musculus GN=Hspa1l PE=2 SV=4

| Observed  | Mr(expt)  | Mr(calc)  | ppm    | Start | End | Miss | Ions | Peptide                         |
|-----------|-----------|-----------|--------|-------|-----|------|------|---------------------------------|
| 804.4262  | 803.4190  | 803.4389  | -24.78 | 503   | 509 | 0    | ---  | K.ITIINDK.G                     |
| 832.4582  | 831.4509  | 831.4450  | 7.13   | 253   | 259 | 1    | ---  | K.KDISQNK.R                     |
| 1183.6895 | 1182.6822 | 1182.6397 | 36.0   | 461   | 471 | 0    | ---  | R.FDLTGIPPAPR.G                 |
| 1197.7358 | 1196.7286 | 1196.6877 | 34.1   | 162   | 173 | 0    | ---  | K.DAGVIAGLNVL.R                 |
| 1390.7797 | 1389.7725 | 1389.7405 | 23.0   | 239   | 249 | 1    | ---  | R.LVSHFVEEFKR.K                 |
| 1465.8545 | 1464.8472 | 1464.8413 | 4.04   | 331   | 344 | 1    | ---  | K.AKIHDIVLVGGSTR.I              |
| 1480.8111 | 1479.8038 | 1479.7834 | 13.8   | 348   | 359 | 1    | ---  | K.VQKLLQDYFNDR.D                |
| 1487.7390 | 1486.7317 | 1486.6940 | 25.3   | 39    | 51  | 0    | 7    | R.TTPSYVAFTDTER.L               |
| 1675.7697 | 1674.7625 | 1674.7234 | 23.3   | 223   | 238 | 0    | ---  | K.ATAGDTHLGGEDFDNR.L            |
| 2774.3263 | 2773.3190 | 2773.3956 | -27.63 | 360   | 386 | 1    | ---  | R.DLNKSINPDEAVAYGAAVQAAILMGDK.S |

No match to: 1109.6245, 1110.6181, 1210.6660, 1428.7622, 1502.7816, 1542.7924, 1552.8628, 1592.9945, 1653.8659, 1687.9394, 1710.9420, 1751.9679, 1776.9783, 1782.9238, 1982.0462, 2691.2918, 2981.4769

4. U5S1\_MOUSE Mass: 110261 Score: 41 Expect: 1.4 Matches: 9

116 kDa U5 small nuclear ribonucleoprotein component OS=Mus musculus GN=Eftud2 PE=2 SV=1

| Observed  | Mr(expt)  | Mr(calc)  | ppm    | Start | End | Miss | Ions | Peptide                                    |
|-----------|-----------|-----------|--------|-------|-----|------|------|--------------------------------------------|
| 832.4582  | 831.4509  | 831.4636  | -15.27 | 602   | 608 | 1    | ---  | K.MLDGLRK.V                                |
| 1428.7622 | 1427.7549 | 1427.7693 | -10.09 | 682   | 693 | 1    | ---  | <u>K</u> .NKITMIAEPLEK.G + Acetyl (N-term) |
| 1480.8111 | 1479.8038 | 1479.7319 | 48.6   | 951   | 962 | 0    | ---  | <u>K</u> .FFDDPMLLELAK.Q + Acetyl (N-term) |
| 1502.7816 | 1501.7743 | 1501.8253 | -33.93 | 790   | 802 | 0    | ---  | <u>K</u> .ILDVVAQEPLHR.G + Acetyl (N-term) |

|           |           |           |        |     |   |     |   |     |                                                                        |
|-----------|-----------|-----------|--------|-----|---|-----|---|-----|------------------------------------------------------------------------|
| 1542.7924 | 1541.7851 | 1541.7872 | -1.33  | 775 | - | 787 | 1 | --- | R.EGPLCDELIRNVK.F                                                      |
| 1552.8628 | 1551.8555 | 1551.8232 | 20.8   | 813 | - | 825 | 1 | --- | R_RVVVYSAFLMATPR.L + Acetyl (N-term)                                   |
| 1710.9420 | 1709.9347 | 1709.9928 | -33.96 | 177 | - | 193 | 1 | --- | R.GVGIKSTPVTVVLPDTK.G                                                  |
| 1776.9783 | 1775.9710 | 1776.0073 | -20.44 | 262 | - | 276 | 1 | --- | R.LILELKLPTDAYYK.L                                                     |
| 2981.4769 | 2980.4696 | 2980.4616 | 2.68   | 422 | - | 447 | 1 | --- | <u>K</u> .FFGEFTGFVDMCVQHPSPKVGAKPK.I + Acetyl (N-term); Oxidation (M) |

**No match to:** 804.4262, 1109.6245, 1110.6181, 1183.6895, 1197.7358, 1210.6660, 1390.7797, 1465.8545, 1487.7390, 1592.9945, 1653.8659, 1675.7697, 1687.9394, 1751.9679, 1782.9238, 1982.0462, 2691.2918, 2774.3263

**5. ECHA\_MOUSE Mass: 83302 Score: 37 Expect: 3.4 Matches: 7**

Trifunctional enzyme subunit alpha, mitochondrial OS=Mus musculus GN=Hadha PE=1 SV=1

| Observed  | Mr(expt)  | Mr(calc)  | ppm    | Start | End | Miss | Ions | Peptide                                             |
|-----------|-----------|-----------|--------|-------|-----|------|------|-----------------------------------------------------|
| 832.4582  | 831.4509  | 831.4702  | -23.13 | 285   | -   | 291  | 1    | --- K.TVEEKVK.K                                     |
| 1183.6895 | 1182.6822 | 1182.6245 | 48.9   | 28    | -   | 38   | 0    | --- R.SFTTSSALLTR.T                                 |
| 1428.7622 | 1427.7549 | 1427.7732 | -12.79 | 54    | -   | 66   | 1    | --- R.INSNSKVNTLNK.E                                |
| 1776.9783 | 1775.9710 | 1775.9166 | 30.6   | 391   | -   | 406  | 1    | --- <u>K</u> .DTT VTGLGRGQQQVFK.G + Acetyl (N-term) |
| 1982.0462 | 1981.0390 | 1980.9835 | 28.0   | 188   | -   | 205  | 1    | --- R.LPKMVGVPAAFDMLTGR.N + 3 Oxidation (M)         |
| 2774.3263 | 2773.3190 | 2773.4255 | -38.41 | 133   | -   | 159  | 0    | --- K.SPKPVVAISGSLGGGLELAIACQYR.I                   |
| 2981.4769 | 2980.4696 | 2980.6168 | -49.39 | 354   | -   | 383  | 1    | --- K.FGAPQKNVQLAILGAGLMGAGIAQVSVDK.G               |

**No match to:** 804.4262, 1109.6245, 1110.6181, 1197.7358, 1210.6660, 1390.7797, 1465.8545, 1480.8111, 1487.7390, 1502.7816, 1542.7924, 1552.8628, 1592.9945, 1653.8659, 1675.7697, 1687.9394, 1710.9420, 1751.9679, 1782.9238, 2691.2918

**6. TARA\_MOUSE Mass: 225171 Score: 36 Expect: 4 Matches: 12**

TRIO and F-actin-binding protein OS=Mus musculus GN=Triobp PE=1 SV=3

| Observed  | Mr(expt)  | Mr(calc)  | ppm    | Start | End | Miss | Ions | Peptide                                                         |
|-----------|-----------|-----------|--------|-------|-----|------|------|-----------------------------------------------------------------|
| 804.4262  | 803.4190  | 803.3960  | 28.6   | 1949  | -   | 1954 | 0    | --- K.EVQCLR.D                                                  |
| 832.4582  | 831.4509  | 831.4199  | 37.4   | 207   | -   | 214  | 1    | --- R.GDTAGQRK.E                                                |
| 1109.6245 | 1108.6173 | 1108.5625 | 49.4   | 737   | -   | 746  | 1    | --- R_DAPRATSPPR.H + Acetyl (N-term)                            |
| 1210.6660 | 1209.6587 | 1209.6829 | -20.04 | 1394  | -   | 1405 | 1    | --- K.RPAEGKAGSPLK.G                                            |
| 1487.7390 | 1486.7317 | 1486.7813 | -33.38 | 1997  | -   | 2009 | 1    | --- R_LAMAALQEKEAVR.N + Acetyl (N-term); Oxidation (M)          |
| 1502.7816 | 1501.7743 | 1501.7929 | -12.39 | 1458  | -   | 1469 | 1    | --- <u>K</u> .KHWFVLTDSCLK.Y + Acetyl (N-term)                  |
| 1542.7924 | 1541.7851 | 1541.7395 | 29.6   | 1511  | -   | 1524 | 0    | --- <u>K</u> .DAVYTLSAMTSRIR.R + Acetyl (N-term); Oxidation (M) |
| 1675.7697 | 1674.7625 | 1674.7380 | 14.6   | 496   | -   | 509  | 1    | --- R_DNPRTSCTSQNTPR.T + Acetyl (N-term)                        |
| 1687.9394 | 1686.9321 | 1686.8550 | 45.7   | 1070  | -   | 1084 | 1    | 0 K.AQIERHLESGHTGPR.Q                                           |
| 1710.9420 | 1709.9347 | 1709.9060 | 16.8   | 1009  | -   | 1024 | 1    | --- R_QSSPAPSRQVTKPSAK.Q + Acetyl (N-term)                      |
| 1782.9238 | 1781.9165 | 1781.9424 | -14.55 | 1229  | -   | 1244 | 1    | --- R.DLLGLLRAPEDGAWTR.L                                        |
| 2981.4769 | 2980.4696 | 2980.4355 | 11.4   | 1109  | -   | 1135 | 1    | --- <u>K</u> .SWGSQKEGPSLGGWPELEGPSLEGIWR.G + Acetyl (N-term)   |

**No match to:** 1110.6181, 1183.6895, 1197.7358, 1390.7797, 1428.7622, 1465.8545, 1480.8111, 1552.8628, 1592.9945, 1653.8659, 1751.9679, 1776.9783, 1982.0462, 2691.2918, 2774.3263

**7. HSP7C\_MOUSE Mass: 71055 Score: 34 Expect: 6 Matches: 6**

Heat shock cognate 71 kDa protein OS=Mus musculus GN=Hspa8 PE=1 SV=1

| Observed | Mr(expt) | Mr(calc) | ppm | Start | End | Miss | Ions | Peptide |
|----------|----------|----------|-----|-------|-----|------|------|---------|
|----------|----------|----------|-----|-------|-----|------|------|---------|

804.4262 803.4190 803.4389 -24.78 501 - 507 0 --- K.ITIINDK.G  
 1480.8111 1479.8038 1479.7470 38.4 300 - 311 1 --- R.ARFEELNADLFR.G  
 1487.7390 1486.7317 1486.6940 25.3 37 - 49 0 7 R.TTPSYVAFTDFER.L  
 1653.8659 1652.8586 1652.8246 20.6 89 - 102 0 --- K.HWPFMVVNDAGRPK.V  
 1982.0462 1981.0390 1980.9905 24.4 138 - 155 0 --- K.TVTNAVVTVPAYFNDSQR.Q  
 2774.3263 2773.3190 2773.3195 -0.20 424 - 447 0 --- K.QTQIFFTYSDNQPGVLIQVYEGER.A  
**No match to:** 832.4582, 1109.6245, 1110.6181, 1183.6895, 1197.7358, 1210.6660, 1390.7797, 1428.7622, 1465.8545, 1502.7816, 1542.7924, 1552.8628, 1592.9945, 1675.7697, 1687.9394, 1710.9420, 1751.9679, 1776.9783, 1782.9238, 2691.2918, 2981.4769

**8. PARVG\_MOUSE Mass: 37610 Score: 34 Expect: 7.3 Matches: 5**

Gamma-parvin OS=Mus musculus GN=Parvg PE=1 SV=1

**Observed Mr(expt) Mr(calc) ppm Start End Miss Ions Peptide**

832.4582 831.4509 831.4450 7.13 301 - 307 1 --- K.DAKSTLR.I + Acetyl (N-term)  
 1653.8659 1652.8586 1652.7767 49.5 316 - 331 1 --- K.HSLRAEGGGAHHATPN.+ Acetyl (N-term)  
 1710.9420 1709.9347 1709.9101 14.4 209 - 223 0 --- K.VHAVQEAIVSFVNQK.L + Acetyl (N-term)  
 1751.9679 1750.9607 1750.9215 22.4 1 - 14 0 --- -.MELEFLYDLLQLPK.E  
 2774.3263 2773.3190 2773.4248 -38.15 260 - 283 0 --- K.EFYITPSSPTEMLHNVTLALDLLK.D + Acetyl (N-term)

**No match to:** 804.4262, 1109.6245, 1110.6181, 1183.6895, 1197.7358, 1210.6660, 1390.7797, 1428.7622, 1465.8545, 1480.8111, 1487.7390, 1502.7816, 1542.7924, 1552.8628, 1592.9945, 1675.7697, 1687.9394, 1776.9783, 1782.9238, 1982.0462, 2691.2918, 2981.4769

**9. TTC23\_MOUSE Mass: 55372 Score: 32 Expect: 9.2 Matches: 6**

Tetratricopeptide repeat protein 23 OS=Mus musculus GN=Ttc23 PE=2 SV=1

**Observed Mr(expt) Mr(calc) ppm Start End Miss Ions Peptide**

1109.6245 1108.6173 1108.5652 47.0 212 - 220 0 --- K.ALEYTEITK.D + Acetyl (N-term)  
 1428.7622 1427.7549 1427.7620 -4.95 439 - 451 0 --- K.TLATQHTIDTLISK.I  
 1480.8111 1479.8038 1479.7834 13.8 190 - 201 1 --- K.LSFAQLYQGQKR.S + Acetyl (N-term)  
 1653.8659 1652.8586 1652.7828 45.9 116 - 129 0 --- K.EILANSIESPCHNK.T + Acetyl (N-term)  
 1776.9783 1775.9710 1775.8914 44.8 403 - 420 1 --- R.ALGRADLAQGNNSGAYAK.L  
 2774.3263 2773.3190 2773.2535 23.6 1 - 25 0 --- \_MQESQDTHMSSHLDEVVAAVSVTSK.N + Acetyl (N-term); Oxidation (M)

**No match to:** 804.4262, 832.4582, 1110.6181, 1183.6895, 1197.7358, 1210.6660, 1390.7797, 1465.8545, 1487.7390, 1502.7816, 1542.7924, 1552.8628, 1592.9945, 1675.7697, 1687.9394, 1710.9420, 1751.9679, 1782.9238, 1982.0462, 2691.2918, 2981.4769

**10. NRAP\_MOUSE Mass: 196735 Score: 32 Expect: 10 Matches: 11**

Nebulin-related-anchoring protein OS=Mus musculus GN=Nrap PE=1 SV=2

**Observed Mr(expt) Mr(calc) ppm Start End Miss Ions Peptide**

804.4262 803.4190 803.4025 20.5 591 - 598 0 --- R.ALGATDSK.L + Acetyl (N-term)  
 1109.6245 1108.6173 1108.5876 26.7 1652 - 1660 1 --- K.YKSDLNLTR.G  
 1502.7816 1501.7743 1501.7123 41.3 653 - 664 0 --- K.LHDYTVLPEDMK.T + Acetyl (N-term)  
 1542.7924 1541.7851 1541.8090 -15.48 1453 - 1466 0 --- K.FTTVVVDSPLIHAK.E  
 1653.8659 1652.8586 1652.8344 14.6 166 - 180 1 --- K.GSFPAMITPAYQRAK.A + Oxidation (M)  
 1687.9394 1686.9321 1686.8829 29.2 199 - 213 0 --- R.VSTFTVPVADTPELLR.A + Acetyl (N-term)  
 1710.9420 1709.9347 1709.9135 12.4 1175 - 1190 1 --- R.GVPCVVPGTLEIEGRK.K  
 1751.9679 1750.9607 1750.9941 -19.10 591 - 607 1 --- R.ALGATDSKLLHSLQVAK.M

1982.0462 1981.0390 1980.9662 36.7 623 - 638 1 --- K.T~~H~~F~~N~~L~~P~~M~~D~~M~~V~~N~~L~~R~~H~~A~~K~~.K + Acetyl (N-term); Oxidation (M)

2691.2918 2690.2845 2690.3300 -16.89 1210 - 1232 1 --- K.Y~~T~~A~~V~~T~~D~~T~~P~~N~~L~~L~~H~~A~~K~~Y~~S~~N~~Q~~I~~T~~N~~E~~R.L + Acetyl (N-term)

2981.4769 2980.4696 2980.5076 -12.76 1000 - 1025 1 --- K.H~~H~~Y~~T~~Q~~T~~A~~D~~L~~P~~E~~V~~L~~L~~A~~K~~L~~N~~A~~M~~N~~I~~S~~E~~T~~R~~.Y + Oxidation (M)

**No match to:** 832.4582, 1110.6181, 1183.6895, 1197.7358, 1210.6660, 1390.7797, 1428.7622, 1465.8545, 1480.8111, 1487.7390, 1552.8628, 1592.9945, 1675.7697, 1776.9783, 1782.9238, 2774.3263

#### Search Parameters

Type of search : MS/MS Ion Search

Enzyme : Trypsin

Fixed modifications : Carbamidomethyl (C)

Variable modifications : Acetyl (N-term), Oxidation (M)

Mass values : Monoisotopic

Protein Mass : Unrestricted

Peptide Mass Tolerance :  $\pm 50$  ppm

Fragment Mass Tolerance:  $\pm 0.5$  Da

Max Missed Cleavages : 1

Instrument type : MALDI-TOF-TOF

Query1 (804.4262,1+) : <no title>

Query2 (832.4582,1+) : <no title>

Query3 (1109.6245,1+) : <no title>

Query4 (1110.6181,1+) : <no title>

Query5 (1183.6895,1+) : <no title>

Query6 (1197.7358,1+) : <no title>

Query7 (1210.6660,1+) : <no title>

Query8 (1390.7797,1+) : <no title>

Query9 (1428.7622,1+) : <no title>

Query10 (1465.8545,1+) : <no title>

Query11 (1480.8111,1+) : <no title>

Query12 (1487.7390,1+) : <no title>

Query13 (1502.7816,1+) : <no title>

Query14 (1542.7924,1+) : <no title>

Query15 (1552.8628,1+) : <no title>

Query16 (1592.9945,1+) : <no title>

Query17 (1653.8659,1+) : <no title>

Query18 (1675.7697,1+) : <no title>

Query19 (1687.9394,1+) : <no title>

Query20 (1710.9420,1+) : <no title>

Query21 (1751.9679,1+) : <no title>

Query22 (1776.9783,1+) : <no title>

Query23 (1782.9238,1+) : <no title>

Query24 (1982.0462,1+) : <no title>

Query25 (2691.2918,1+) : <no title>

Query26 (2774.3263,1+) : <no title>

Query27 (2981.4769,1+) : <no title>

**Mascot:** <http://www.matrixscience.com/>

# **MASCOT** Mascot Search Results **SCIENCE**

User :  
Email :  
Search title : Auto submitted by BioTools  
Database : SwissProt 57.15 (515203 sequences; 181334896 residues)  
Taxonomy : Mus. (16281 sequences)  
Timestamp : 20 May 2013 at 01:32:58 GMT  
Warning : A Peptide summary report will usually give a much clearer picture of MS/MS search results.  
Top Score : 331 for HS71A\_MOUSE, Heat shock 70 kDa protein 1A OS=Mus musculus GN=Hspa1a PE=1 SV=2

## Mascot Score Histogram

Protein score is  $-10 \cdot \log(P)$ , where P is the probability that the observed match is a random event.

Protein scores greater than 55 are significant ( $p < 0.05$ ).

Protein scores are derived from ions scores as a non-probabilistic basis for ranking protein hits.

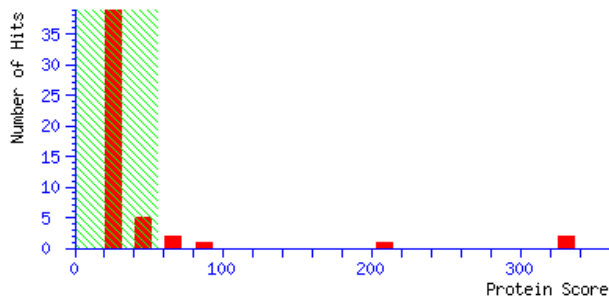

## Protein Summary Report

### Index

| Accession                      | Mass   | Score | Description                                                                   |
|--------------------------------|--------|-------|-------------------------------------------------------------------------------|
| 1. <a href="#">HS71A_MOUSE</a> | 70321  | 331   | Heat shock 70 kDa protein 1A OS=Mus musculus GN=Hspa1a PE=1 SV=2              |
| 2. <a href="#">HS71B_MOUSE</a> | 70418  | 330   | Heat shock 70 kDa protein 1B OS=Mus musculus GN=Hspa1b PE=1 SV=3              |
| 3. <a href="#">HS71L_MOUSE</a> | 70992  | 200   | Heat shock 70 kDa protein 1-like OS=Mus musculus GN=Hspa1l PE=2 SV=4          |
| 4. <a href="#">HSP7C_MOUSE</a> | 71055  | 90    | Heat shock cognate 71 kDa protein OS=Mus musculus GN=Hspa8 PE=1 SV=1          |
| 5. <a href="#">HSP72_MOUSE</a> | 69983  | 71    | Heat shock-related 70 kDa protein 2 OS=Mus musculus GN=Hspa2 PE=1 SV=1        |
| 6. <a href="#">ALBU_MOUSE</a>  | 70700  | 71    | Serum albumin OS=Mus musculus GN=Alb PE=1 SV=3                                |
| 7. <a href="#">NRAP_MOUSE</a>  | 196735 | 50    | Nebulin-related-anchoring protein OS=Mus musculus GN=Nrap PE=1 SV=2           |
| 8. <a href="#">NIBAN_MOUSE</a> | 103440 | 45    | Protein Niban OS=Mus musculus GN=Niban PE=1 SV=2                              |
| 9. <a href="#">MOB2_MOUSE</a>  | 27176  | 43    | Mps one binder kinase activator-like 2 OS=Mus musculus GN=Mob2 PE=2 SV=1      |
| 10. <a href="#">UBA6_MOUSE</a> | 119430 | 37    | Ubiquitin-like modifier-activating enzyme 6 OS=Mus musculus GN=Uba6 PE=2 SV=1 |

## Results List

1. HS71A\_MOUSE Mass: 70321 Score: 331 Expect: 1.3e-029 Matches: 20

Heat shock 70 kDa protein 1A OS=Mus musculus GN=Hsp1a PE=1 SV=2

| Observed  | Mr(expt)  | Mr(calc)  | ppm    | Start | End | Miss | Ions | Peptide |                                          |
|-----------|-----------|-----------|--------|-------|-----|------|------|---------|------------------------------------------|
| 1017.5586 | 1016.5513 | 1016.5614 | -10.00 | 501   | -   | 509  | 1    | ---     | K.ITITNDKGR.L                            |
| 1109.5740 | 1108.5667 | 1108.5665 | 0.17   | 349   | -   | 357  | 0    | ---     | K.LLQDFNQR.D                             |
| 1137.5575 | 1136.5502 | 1136.5462 | 3.58   | 525   | -   | 533  | 1    | ---     | R.YKAEDEVQR.D                            |
| 1183.6450 | 1182.6378 | 1182.6397 | -1.64  | 459   | -   | 469  | 0    | ---     | R.FELSGIPPAPR.G                          |
| 1197.6930 | 1196.6858 | 1196.6877 | -1.64  | 160   | -   | 171  | 0    | 54      | K.DAGVIAGLNVLR.I                         |
| 1228.6365 | 1227.6292 | 1227.6207 | 6.88   | 26    | -   | 36   | 0    | ---     | K.VEIIANDQGNR.T                          |
| 1315.6157 | 1314.6084 | 1314.5914 | 12.9   | 302   | -   | 311  | 0    | ---     | R.FEELCSDLFR.G                           |
| 1390.7523 | 1389.7450 | 1389.7405 | 3.28   | 237   | -   | 247  | 1    | 41      | R.LVSHFVEEFKR.K                          |
| 1465.8145 | 1464.8072 | 1464.8049 | 1.60   | 329   | -   | 342  | 0    | ---     | K.AQIHDLVLVGGSTR.I                       |
| 1487.7107 | 1486.7035 | 1486.6940 | 6.36   | 37    | -   | 49   | 0    | 58      | R.TTPSYVAFTDTER.L                        |
| 1542.7437 | 1541.7364 | 1541.7296 | 4.41   | 300   | -   | 311  | 1    | ---     | R.ARFEELCSDLFR.G                         |
| 1666.8360 | 1665.8287 | 1665.8264 | 1.43   | 89    | -   | 102  | 0    | ---     | K.HWPFQVVNDGDKPK.V                       |
| 1675.7421 | 1674.7348 | 1674.7234 | 6.81   | 221   | -   | 236  | 0    | ---     | K.ATAGDTHLGGEDFDNR.L                     |
| 1687.9037 | 1686.8964 | 1686.8940 | 1.40   | 172   | -   | 187  | 0    | 36      | R.IINEPTAAAIAYGLDR.T                     |
| 1814.9604 | 1813.9531 | 1813.9435 | 5.32   | 57    | -   | 72   | 1    | ---     | K.NQVALNPQNTVFDAGR.L                     |
| 2232.1237 | 2231.1164 | 2231.0416 | 33.6   | 540   | -   | 559  | 1    | ---     | K.NALESYAFNMKSAVEDEGLK.G + Oxidation (M) |
| 2774.3164 | 2773.3092 | 2773.3195 | -3.74  | 424   | -   | 447  | 0    | ---     | K.QTQIFTTYSNDQPGVLIQVYEGER.A             |
| 2975.4818 | 2974.4745 | 2974.4825 | -2.66  | 129   | -   | 155  | 0    | ---     | K.EIAEAYLGHVPTNAVITVPAYFNDSQR.Q          |
| 2981.4505 | 2980.4432 | 2980.4553 | -4.07  | 273   | -   | 299  | 0    | ---     | R.TLSSSTQASLEIDSLFEGIDFYTSITR.A          |
| 3234.6126 | 3233.6053 | 3233.6179 | -3.88  | 127   | -   | 155  | 1    | ---     | K.MKEIAEAYLGHVPTNAVITVPAYFNDSQR.Q        |

**No match to:** 1033.4768, 1110.5576, 1208.6312, 1250.6984, 1367.7083, 1380.6566, 1439.7722, 1455.8158, 1479.7960, 1481.7844, 1512.8508, 1516.7153, 1552.8426, 1609.7908, 1653.8350, 1662.8532, 1681.8354, 1882.9362, 1901.9165, 1981.9916, 2033.0248, 2650.3123, 2691.2971, 2748.3236, 2757.3156, 2804.3653

2. HS71B\_MOUSE Mass: 70418 Score: 330 Expect: 1.6e-029 Matches: 20

Heat shock 70 kDa protein 1B OS=Mus musculus GN=Hsp1b PE=1 SV=3

| Observed  | Mr(expt)  | Mr(calc)  | ppm    | Start | End | Miss | Ions | Peptide |                      |
|-----------|-----------|-----------|--------|-------|-----|------|------|---------|----------------------|
| 1017.5586 | 1016.5513 | 1016.5614 | -10.00 | 501   | -   | 509  | 1    | ---     | K.ITITNDKGR.L        |
| 1109.5740 | 1108.5667 | 1108.5665 | 0.17   | 349   | -   | 357  | 0    | ---     | K.LLQDFNQR.D         |
| 1137.5575 | 1136.5502 | 1136.5462 | 3.58   | 525   | -   | 533  | 1    | ---     | R.YKAEDEVQR.D        |
| 1183.6450 | 1182.6378 | 1182.6397 | -1.64  | 459   | -   | 469  | 0    | ---     | R.FELSGIPPAPR.G      |
| 1197.6930 | 1196.6858 | 1196.6877 | -1.64  | 160   | -   | 171  | 0    | 54      | K.DAGVIAGLNVLR.I     |
| 1228.6365 | 1227.6292 | 1227.6207 | 6.88   | 26    | -   | 36   | 0    | ---     | K.VEIIANDQGNR.T      |
| 1315.6157 | 1314.6084 | 1314.5914 | 12.9   | 302   | -   | 311  | 0    | ---     | R.FEELCSDLFR.G       |
| 1390.7523 | 1389.7450 | 1389.7405 | 3.28   | 237   | -   | 247  | 1    | 41      | R.LVSHFVEEFKR.K      |
| 1465.8145 | 1464.8072 | 1464.8049 | 1.60   | 329   | -   | 342  | 0    | ---     | K.AQIHDLVLVGGSTR.I   |
| 1487.7107 | 1486.7035 | 1486.6940 | 6.36   | 37    | -   | 49   | 0    | 58      | R.TTPSYVAFTDTER.L    |
| 1542.7437 | 1541.7364 | 1541.7296 | 4.41   | 300   | -   | 311  | 1    | ---     | R.ARFEELCSDLFR.G     |
| 1666.8360 | 1665.8287 | 1665.8264 | 1.43   | 89    | -   | 102  | 0    | ---     | K.HWPFQVVNDGDKPK.V   |
| 1675.7421 | 1674.7348 | 1674.7234 | 6.81   | 221   | -   | 236  | 0    | ---     | K.ATAGDTHLGGEDFDNR.L |
| 1687.9037 | 1686.8964 | 1686.8940 | 1.40   | 172   | -   | 187  | 0    | 36      | R.IINEPTAAAIAYGLDR.T |



1814.9604 1813.9531 1813.9435 5.32 57 - 72 1 --- K.NQVALNPQNTVFDAGR.L  
 2232.1237 2231.1164 2231.0416 33.6 540 - 559 1 --- K.NALESYAFNMKSAVEDEGLK.G + Oxidation (M)  
 2774.3164 2773.3092 2773.3195 -3.74 424 - 447 0 --- K.QTQIFFTYSDNQPGVLIQVYEGGER.A  
 2975.4818 2974.4745 2974.4825 -2.66 129 - 155 0 --- K.EIAEAYLGHPVTVNAVITVPAYFNDSQR.Q  
 2981.4505 2980.4432 2980.4553 -4.07 273 - 299 0 --- R.TLSSSTQASLEIDSLFEGIDFYTSITR.A  
 3234.6126 3233.6053 3233.6179 -3.88 127 - 155 1 --- K.MKEIAEAYLGHPVTVNAVITVPAYFNDSQR.Q

**No match to:** 1033.4768, 1110.5576, 1208.6312, 1250.6984, 1367.7083, 1380.6566, 1439.7722, 1455.8158, 1479.7960, 1481.7844, 1512.8508, 1516.7153, 1552.8426, 1609.7908, 1653.8350, 1662.8532, 1681.8354, 1882.9362, 1901.9165, 1981.9916, 2033.0248, 2650.3123, 2691.2971, 2748.3236, 2757.3156, 2804.3653

**3. HS71L\_MOUSE Mass: 70992 Score: 200 Expect: 1.6e-016 Matches: 11**

Heat shock 70 kDa protein 1-like OS=Mus musculus GN=Hspall PE=2 SV=4

| Observed  | Mr(expt)  | Mr(calc)  | ppm    | Start | End   | Miss | Ions | Peptide                                            |
|-----------|-----------|-----------|--------|-------|-------|------|------|----------------------------------------------------|
| 1017.5586 | 1016.5513 | 1016.5614 | -10.00 | 503   | - 511 | 1    | ---  | K.ITITNDKGR.L                                      |
| 1137.5575 | 1136.5502 | 1136.5098 | 35.6   | 527   | - 535 | 1    | ---  | R.YKAEDEGQR.E + Acetyl (N-term)                    |
| 1183.6450 | 1182.6378 | 1182.6397 | -1.65  | 461   | - 471 | 0    | ---  | R.FDLTGIPPAPR.G                                    |
| 1197.6930 | 1196.6858 | 1196.6877 | -1.64  | 162   | - 173 | 0    | 54   | K.DAGVIAGLNVLR.I                                   |
| 1228.6365 | 1227.6292 | 1227.6207 | 6.88   | 28    | - 38  | 0    | ---  | K.VEIIANDQGNR.T                                    |
| 1390.7523 | 1389.7450 | 1389.7405 | 3.28   | 239   | - 249 | 1    | 41   | R.LVSHFVEEFKR.K                                    |
| 1465.8145 | 1464.8072 | 1464.8413 | -23.23 | 331   | - 344 | 1    | ---  | K.AKIHDIVLVGGSTR.I                                 |
| 1487.7107 | 1486.7035 | 1486.6940 | 6.36   | 39    | - 51  | 0    | 58   | R.TTPSYVAFTDTER.L                                  |
| 1675.7421 | 1674.7348 | 1674.7234 | 6.81   | 223   | - 238 | 0    | ---  | K.ATAGDTHLGGEDFDNR.L                               |
| 2774.3164 | 2773.3092 | 2773.3956 | -31.17 | 360   | - 386 | 1    | ---  | R.DLNKSINPDEAVAYGAAVQAAILMGDK.S                    |
| 2975.4818 | 2974.4745 | 2974.4958 | -7.13  | 472   | - 499 | 1    | ---  | R.GVPQIEVTFDIDANGILNVTAMDKSTGK.A + Acetyl (N-term) |

**No match to:** 1033.4768, 1109.5740, 1110.5576, 1208.6312, 1250.6984, 1315.6157, 1367.7083, 1380.6566, 1439.7722, 1455.8158, 1479.7960, 1481.7844, 1512.8508, 1516.7153, 1542.7437, 1552.8426, 1609.7908, 1653.8350, 1662.8532, 1666.8360, 1681.8354, 1687.9037, 1814.9604, 1882.9362, 1901.9165, 1981.9916, 2033.0248, 2232.1237, 2650.3123, 2691.2971, 2748.3236, 2757.3156, 2804.3653, 2981.4505, 3234.6126

**4. HSP7C\_MOUSE Mass: 71055 Score: 90 Expect: 1.8e-005 Matches: 8**

Heat shock cognate 71 kDa protein OS=Mus musculus GN=Hspa8 PE=1 SV=1

| Observed  | Mr(expt)  | Mr(calc)  | ppm    | Start | End   | Miss | Ions | Peptide                       |
|-----------|-----------|-----------|--------|-------|-------|------|------|-------------------------------|
| 1017.5586 | 1016.5513 | 1016.5614 | -10.00 | 501   | - 509 | 1    | ---  | K.ITITNDKGR.L                 |
| 1197.6930 | 1196.6858 | 1196.6554 | 25.4   | 459   | - 469 | 0    | 5    | K.FELTGIPPAPR.G               |
| 1228.6365 | 1227.6292 | 1227.6207 | 6.88   | 26    | - 36  | 0    | ---  | K.VEIIANDQGNR.T               |
| 1481.7844 | 1480.7771 | 1480.7998 | -15.33 | 329   | - 342 | 0    | ---  | K.SQIHDIVLVGGSTR.I            |
| 1487.7107 | 1486.7035 | 1486.6940 | 6.36   | 37    | - 49  | 0    | 58   | R.TTPSYVAFTDTER.L             |
| 1653.8350 | 1652.8277 | 1652.8246 | 1.92   | 89    | - 102 | 0    | ---  | K.HWPFMNVNDAGRPK.V            |
| 1981.9916 | 1980.9844 | 1980.9905 | -3.11  | 138   | - 155 | 0    | ---  | K.TVTNAVVTVPAYFNDSQR.Q        |
| 2774.3164 | 2773.3092 | 2773.3195 | -3.74  | 424   | - 447 | 0    | ---  | K.QTQIFFTYSDNQPGVLIQVYEGGER.A |

**No match to:** 1033.4768, 1109.5740, 1110.5576, 1137.5575, 1183.6450, 1208.6312, 1250.6984, 1315.6157, 1367.7083, 1380.6566, 1390.7523, 1439.7722, 1455.8158, 1465.8145, 1479.7960, 1512.8508, 1516.7153, 1542.7437, 1552.8426, 1609.7908, 1662.8532, 1666.8360, 1675.7421, 1681.8354, 1687.9037, 1814.9604, 1882.9362, 1901.9165, 2033.0248, 2232.1237, 2650.3123, 2691.2971, 2748.3236, 2757.3156, 2804.3653, 2975.4818, 2981.4505, 3234.6126

5. HSP72\_MOUSE Mass: 69983 Score: 71 Expect: 0.0012 Matches: 6

Heat shock-related 70 kDa protein 2 OS=Mus musculus GN=Hspa2 PE=1 SV=1

**Observed Mr(expt) Mr(calc) ppm Start End Miss Ions Peptide**

1017.5586 1016.5513 1016.5614 -10.00 504 - 512 1 --- K.ITIFNDKGR.L  
 1183.6450 1182.6378 1182.6397 -1.65 462 - 472 0 --- K.FDLTGIPPAPR.G  
 1228.6365 1227.6292 1227.6207 6.88 27 - 37 0 --- K.VEIIANDQGNR.T  
 1367.7083 1366.7010 1366.6802 15.2 128 - 139 1 --- K.MKEIAEAYLGK.V + Acetyl (N-term); Oxidation (M)  
 1487.7107 1486.7035 1486.6940 6.36 38 - 50 0 58 R.TTPSYVAFTDTER.L  
 1662.8532 1661.8459 1661.7831 37.8 58 - 71 0 --- K.NQVAMNPTNTIFDR.K + Acetyl (N-term)

**No match to:** 1033.4768, 1109.5740, 1110.5576, 1137.5575, 1197.6930, 1208.6312, 1250.6984, 1315.6157, 1380.6566, 1390.7523, 1439.7722, 1455.8158, 1465.8145, 1479.7960, 1481.7844, 1512.8508, 1516.7153, 1542.7437, 1552.8426, 1609.7908, 1653.8350, 1666.8360, 1675.7421, 1681.8354, 1687.9037, 1814.9604, 1882.9362, 1901.9165, 1981.9916, 2033.0248, 2232.1237, 2650.3123, 2691.2971, 2748.3236, 2757.3156, 2774.3164, 2804.3653, 2975.4818, 2981.4505, 3234.6126

6. ALBU\_MOUSE Mass: 70700 Score: 71 Expect: 0.0013 Matches: 14

Serum albumin OS=Mus musculus GN=Alb PE=1 SV=3

**Observed Mr(expt) Mr(calc) ppm Start End Miss Ions Peptide**

1017.5586 1016.5513 1016.5291 21.8 89 - 97 0 --- K.SLHTLFGDK.L  
 1250.6984 1249.6912 1249.7142 -18.46 559 - 569 1 --- K.HKPKATAEQLK.T  
 1439.7722 1438.7649 1438.7780 -9.11 439 - 452 0 --- K.APQVSTPTLVEAAR.N  
 1455.8158 1454.8085 1454.7994 6.28 361 - 372 1 --- R.RHPDYSVSLLLR.L  
 1479.7960 1478.7887 1478.7881 0.39 422 - 434 0 --- K.LGEYGFQNAIVR.Y  
 1481.7844 1480.7771 1480.7885 -7.73 439 - 452 0 --- K.APQVSTPTLVEAAR.N + Acetyl (N-term)  
 1609.7908 1608.7835 1608.7824 0.68 348 - 360 0 --- K.DVFLGTFLYEYSR.R  
 1662.8532 1661.8459 1661.8447 0.76 470 - 483 0 --- R.LPCVEDYLSAILNR.V  
 1681.8354 1680.8281 1680.8359 -4.63 243 - 257 0 --- R.LSQTFPNADFAEITK.L  
 1882.9362 1881.9289 1881.9295 -0.29 509 - 524 0 --- R.RPCFSALTVDETYVPK.E  
 1901.9165 1900.9092 1900.8890 10.6 153 - 168 0 --- K.ENPTTFMGHYLHEVAR.R  
 1981.9916 1980.9844 1980.9211 31.9 585 - 602 1 --- K.AADKDTCFSTEGPNLVTR.C  
 2650.3123 2649.3050 2649.1761 48.7 563 - 584 1 --- K.ATAEQLKTVMDFAQFLDTCKK  
 A + Acetyl (N-term); Oxidation (M)  
 2804.3653 2803.3580 2803.3013 20.3 287 - 309 1 --- K.YMCENQATISSKLQCCDKPLK.  
 K + Oxidation (M)

**No match to:** 1033.4768, 1109.5740, 1110.5576, 1137.5575, 1183.6450, 1197.6930, 1208.6312, 1228.6365, 1315.6157, 1367.7083, 1380.6566, 1390.7523, 1465.8145, 1487.7107, 1512.8508, 1516.7153, 1542.7437, 1552.8426, 1653.8350, 1666.8360, 1675.7421, 1687.9037, 1814.9604, 2033.0248, 2232.1237, 2691.2971, 2748.3236, 2757.3156, 2774.3164, 2975.4818, 2981.4505, 3234.6126

7. NRAP\_MOUSE Mass: 196735 Score: 50 Expect: 0.17 Matches: 19

Nebulin-related-anchoring protein OS=Mus musculus GN=Nrap PE=1 SV=2

**Observed Mr(expt) Mr(calc) ppm Start End Miss Ions Peptide**

|           |           |           |        |      |   |      |   |     |                                                                        |
|-----------|-----------|-----------|--------|------|---|------|---|-----|------------------------------------------------------------------------|
| 1017.5586 | 1016.5513 | 1016.5251 | 25.8   | 589  | - | 598  | 1 | --- | <u>K</u> _GRALGATDSK.L + Acetyl (N-term)                               |
| 1109.5740 | 1108.5667 | 1108.5876 | -18.87 | 1652 | - | 1660 | 1 | --- | K.YKSDLNLTR.G                                                          |
| 1228.6365 | 1227.6292 | 1227.6360 | -5.54  | 1399 | - | 1408 | 1 | --- | <u>K</u> _KAHALQSEFR.Y + Acetyl (N-term)                               |
| 1315.6157 | 1314.6084 | 1314.6172 | -6.72  | 1500 | - | 1510 | 1 | --- | R_2ARMNAMHLSDK.V + Acetyl (N-term)                                     |
| 1439.7722 | 1438.7649 | 1438.7238 | 28.5   | 1016 | - | 1027 | 1 | --- | K.LNAMNISETRYK.E                                                       |
| 1481.7844 | 1480.7771 | 1480.7344 | 28.9   | 1016 | - | 1027 | 1 | --- | <u>K</u> _LNAMNISETRYK.E + Acetyl (N-term)                             |
| 1542.7437 | 1541.7364 | 1541.8090 | -47.05 | 1453 | - | 1466 | 0 | --- | K.FTTVVDSPDLIHAK.E                                                     |
| 1653.8350 | 1652.8277 | 1652.8344 | -4.05  | 166  | - | 180  | 1 | --- | K.GSFPAMITPAYQRAK.A + Oxidation (M)                                    |
| 1666.8360 | 1665.8287 | 1665.8470 | -10.94 | 555  | - | 569  | 1 | --- | <u>K</u> _GFEMKLDAMSLAAK.A + Acetyl (N-term)                           |
| 1681.8354 | 1680.8281 | 1680.7777 | 30.0   | 724  | - | 738  | 1 | --- | K.FTSVADSSQMEHAKK.S + Oxidation (M)                                    |
| 1687.9037 | 1686.8964 | 1686.8829 | 8.03   | 199  | - | 213  | 0 | --- | R_2VSTFTPVADTPELLR.A + Acetyl (N-term)                                 |
| 1882.9362 | 1881.9289 | 1881.8527 | 40.5   | 144  | - | 159  | 1 | --- | R_2MVEARQSLGEGYTEDR.E + Acetyl (N-term)                                |
| 1901.9165 | 1900.9092 | 1900.9101 | -0.48  | 1160 | - | 1174 | 1 | --- | K.LQSENLYRSDLNFM.R.G + Oxidation (M)                                   |
| 1981.9916 | 1980.9844 | 1980.9662 | 9.16   | 623  | - | 638  | 1 | --- | <u>K</u> _THFNLPMDMVNLRHAK.K + Acetyl (N-term); Oxidation (M)          |
| 2650.3123 | 2649.3050 | 2649.2540 | 19.2   | 860  | - | 881  | 1 | --- | <u>K</u> _GFEDTRSQCCHISLDMVHLVHAR.Q + Acetyl (N-term)                  |
| 2691.2971 | 2690.2898 | 2690.3300 | -14.93 | 1210 | - | 1232 | 1 | --- | <u>K</u> _YTAVTDTPNLLHAKYSNQITNER.L + Acetyl (N-term)                  |
| 2748.3236 | 2747.3164 | 2747.2288 | 31.9   | 1346 | - | 1368 | 1 | --- | <u>K</u> _EAASSQAQCHLPMDMMYLVHARK.A + Acetyl (N-term); 2 Oxidation (M) |
| 2757.3156 | 2756.3083 | 2756.3617 | -19.35 | 1078 | - | 1102 | 1 | --- | R.SLEDDLSLAHSVHATSLQSDVNYKK.G                                          |
| 2981.4505 | 2980.4432 | 2980.5076 | -21.62 | 1000 | - | 1025 | 1 | --- | K.HHYTQTADLPEVLLAKLNAMNISETR.Y + Oxidation (M)                         |

**No match to:** 1033.4768, 1110.5576, 1137.5575, 1183.6450, 1197.6930, 1208.6312, 1250.6984, 1367.7083, 1380.6566, 1390.7523, 1455.8158, 1465.8145, 1479.7960, 1487.7107, 1512.8508, 1516.7153, 1552.8426, 1609.7908, 1662.8532, 1675.7421, 1814.9604, 2033.0248, 2232.1237, 2774.3164, 2804.3653, 2975.4818, 3234.6126

**8. NIBAN MOUSE Mass: 103440 Score: 45 Expect: 0.51 Matches: 7**

Protein Niban OS=Mus musculus GN=Niban PE=1 SV=2

**Observed Mr(expt) Mr(calc) ppm Start End Miss Ions Peptide**

|           |           |           |      |     |   |     |   |     |                       |
|-----------|-----------|-----------|------|-----|---|-----|---|-----|-----------------------|
| 1033.4768 | 1032.4696 | 1032.4665 | 2.98 | 27  | - | 34  | 0 | --- | K.NFSPYYSR.Q          |
| 1208.6312 | 1207.6239 | 1207.6019 | 18.2 | 186 | - | 195 | 0 | --- | K.FSALLNDCIR.H        |
| 1380.6566 | 1379.6493 | 1379.6405 | 6.41 | 35  | - | 45  | 0 | --- | R.QYSVAFCNHVR.S       |
| 1512.8508 | 1511.8436 | 1511.8361 | 4.91 | 426 | - | 437 | 1 | --- | R.FRFPHVLDLVVQR.T     |
| 1552.8426 | 1551.8353 | 1551.8238 | 7.40 | 160 | - | 171 | 0 | 33  | K.AFPVYLWQPYLR.H      |
| 1662.8532 | 1661.8459 | 1661.8049 | 24.7 | 21  | - | 34  | 1 | --- | K.TEASIKNFSPYYSR.Q    |
| 2033.0248 | 2032.0175 | 2032.0054 | 5.96 | 204 | - | 220 | 0 | --- | K.QTTFEAQAFLEAVQFFR.Q |

**No match to:** 1017.5586, 1109.5740, 1110.5576, 1137.5575, 1183.6450, 1197.6930, 1228.6365, 1250.6984, 1315.6157, 1367.7083, 1390.7523, 1439.7722, 1455.8158, 1465.8145, 1479.7960, 1481.7844, 1487.7107, 1516.7153, 1542.7437, 1609.7908, 1653.8350, 1666.8360, 1675.7421, 1681.8354, 1687.9037, 1814.9604, 1882.9362, 1901.9165, 1981.9916, 2232.1237, 2650.3123, 2691.2971, 2748.3236, 2757.3156, 2774.3164, 2804.3653, 2975.4818, 2981.4505, 3234.6126

9. MOB2\_MOUSE Mass: 27176 Score: 43 Expect: 0.76 Matches: 7

Mps one binder kinase activator-like 2 OS=Mus musculus GN=Mob2 PE=2 SV=1

**Observed Mr(expt) Mr(calc) ppm Start End Miss Ions Peptide**

1017.5586 1016.5513 1016.5178 32.9 188 - 195 0 --- R\_EFNLLDPK.E + Acetyl (N-term)  
1137.5575 1136.5502 1136.5358 12.7 1 - 9 1 --- \_MDWLMGKSK.A + Acetyl (N-term)  
1367.7083 1366.7010 1366.7568 -40.82 10 - 22 1 --- K.AKPNGKKPAAEK.K  
1439.7722 1438.7649 1438.7344 21.2 135 - 146 1 --- R\_EFPSSFESLVKK.I + Acetyl (N-term)  
1681.8354 1680.8281 1680.8359 -4.63 121 - 134 1 --- K\_LVTDEDVFPTKYGR.E + Acetyl (N-term)  
1687.9037 1686.8964 1686.8253 42.1 132 - 145 1 --- K\_YGREFPSSFESLVK.K + Acetyl (N-term)  
1901.9165 1900.9092 1900.8699 20.7 105 - 120 0 --- K\_CTAPQYVDFVMSSVQK.L + Acetyl (N-term)

**No match to:** 1033.4768, 1109.5740, 1110.5576, 1183.6450, 1197.6930, 1208.6312, 1228.6365, 1250.6984, 1315.6157, 1380.6566, 1390.7523, 1455.8158, 1465.8145, 1479.7960, 1481.7844, 1487.7107, 1512.8508, 1516.7153, 1542.7437, 1552.8426, 1609.7908, 1653.8350, 1662.8532, 1666.8360, 1675.7421, 1814.9604, 1882.9362, 1981.9916, 2033.0248, 2232.1237, 2650.3123, 2691.2971, 2748.3236, 2757.3156, 2774.3164, 2804.3653, 2975.4818, 2981.4505, 3234.6126

10. UBA6\_MOUSE Mass: 119430 Score: 37 Expect: 3 Matches: 8

Ubiquitin-like modifier-activating enzyme 6 OS=Mus musculus GN=Uba6 PE=2 SV=1

**Observed Mr(expt) Mr(calc) ppm Start End Miss Ions Peptide**

1208.6312 1207.6239 1207.5986 21.0 948 - 957 0 --- R.NGISFTIWR.W  
1439.7722 1438.7649 1438.7014 44.1 840 - 851 0 --- K\_SDLQMTVLSFEK.D + Acetyl (N-term)  
1487.7107 1486.7035 1486.7160 -8.42 49 - 61 1 18 R.YVLGDTAMQKMAK.S + 2 Oxidation (M)  
1662.8532 1661.8459 1661.8546 -5.20 777 - 791 0 --- K.DLSVNSLMDILSEVK.I  
1681.8354 1680.8281 1680.8148 7.95 659 - 672 0 --- K.FWQAYPSAEDVLQK.I  
1981.9916 1980.9844 1981.0421 -29.16 730 - 746 1 --- K\_DGSLFWQSPKRPPSPIK.F + Acetyl (N-term)  
2232.1237 2231.1164 2231.1732 -25.45 673 - 691 1 --- K\_IQNGQSLEGCFQVIKLLSR.R + Acetyl (N-term)  
3234.6126 3233.6053 3233.6240 -5.76 764 - 791 1 --- K.LYATVYCIPIFSEKDLVNSLMDILSEVK.I

**No match to:** 1017.5586, 1033.4768, 1109.5740, 1110.5576, 1137.5575, 1183.6450, 1197.6930, 1228.6365, 1250.6984, 1315.6157, 1367.7083, 1380.6566, 1390.7523, 1455.8158, 1465.8145, 1479.7960, 1481.7844, 1512.8508, 1516.7153, 1542.7437, 1552.8426, 1609.7908, 1653.8350, 1666.8360, 1675.7421, 1687.9037, 1814.9604, 1882.9362, 1901.9165, 2033.0248, 2650.3123, 2691.2971, 2748.3236, 2757.3156, 2774.3164, 2804.3653, 2975.4818, 2981.4505

**Search Parameters**

**Type of search** : MS/MS Ion Search  
**Enzyme** : Trypsin  
**Fixed modifications** : Carbamidomethyl (C)  
**Variable modifications** : Acetyl (N-term), Oxidation (M)  
**Mass values** : Monoisotopic  
**Protein Mass** : Unrestricted  
**Peptide Mass Tolerance** : ±50 ppm  
**Fragment Mass Tolerance**: ±0.5 Da  
**Max Missed Cleavages** : 1  
**Instrument type** : MALDI-TOF-TOF

Query1 (1017.5586,1+) : <no title>  
Query2 (1033.4768,1+) : <no title>  
Query3 (1109.5740,1+) : <no title>  
Query4 (1110.5576,1+) : <no title>  
Query5 (1137.5575,1+) : <no title>  
Query6 (1183.6450,1+) : <no title>  
Query7 (1197.6930,1+) : <no title>  
Query8 (1208.6312,1+) : <no title>  
Query9 (1228.6365,1+) : <no title>  
Query10 (1250.6984,1+) : <no title>  
Query11 (1315.6157,1+) : <no title>  
Query12 (1367.7083,1+) : <no title>  
Query13 (1380.6566,1+) : <no title>  
Query14 (1390.7523,1+) : <no title>  
Query15 (1439.7722,1+) : <no title>  
Query16 (1455.8158,1+) : <no title>  
Query17 (1465.8145,1+) : <no title>  
Query18 (1479.7960,1+) : <no title>  
Query19 (1481.7844,1+) : <no title>  
Query20 (1487.7107,1+) : <no title>  
Query21 (1512.8508,1+) : <no title>  
Query22 (1516.7153,1+) : <no title>  
Query23 (1542.7437,1+) : <no title>  
Query24 (1552.8426,1+) : <no title>  
Query25 (1609.7908,1+) : <no title>  
Query26 (1653.8350,1+) : <no title>  
Query27 (1662.8532,1+) : <no title>  
Query28 (1666.8360,1+) : <no title>  
Query29 (1675.7421,1+) : <no title>  
Query30 (1681.8354,1+) : <no title>  
Query31 (1687.9037,1+) : <no title>  
Query32 (1814.9604,1+) : <no title>  
Query33 (1882.9362,1+) : <no title>  
Query34 (1901.9165,1+) : <no title>  
Query35 (1981.9916,1+) : <no title>  
Query36 (2033.0248,1+) : <no title>  
Query37 (2232.1237,1+) : <no title>  
Query38 (2650.3123,1+) : <no title>  
Query39 (2691.2971,1+) : <no title>  
Query40 (2748.3236,1+) : <no title>  
Query41 (2757.3156,1+) : <no title>  
Query42 (2774.3164,1+) : <no title>  
Query43 (2804.3653,1+) : <no title>  
Query44 (2975.4818,1+) : <no title>

Query45 (2981.4505,1+) : <no title>

Query46 (3234.6126,1+) : <no title>

**Mascot:** <http://www.matrixscience.com/>

# MASCOT Search Results

**User** :  
**Email** :  
**Search title** : Auto submitted by BioTools  
**Database** : SwissProt 57.15 (515203 sequences; 181334896 residues)  
**Taxonomy** : Mus. (16281 sequences)  
**Timestamp** : 20 May 2013 at 01:33:23 GMT  
**Warning** : A Peptide summary report will usually give a much clearer picture of MS/MS search results.  
**Top Score** : 84 for ODO2\_MOUSE, Dihydropolyllysine-residue succinyltransferase component of 2-oxoglutarate dehydrogenase complex, mitochondrial OS=Mus musculus GN=Dlst PE=1 SV=1

## Mascot Score Histogram

Protein score is  $-10 \cdot \log(P)$ , where P is the probability that the observed match is a random event.

Protein scores greater than 55 are significant ( $p < 0.05$ ).

Protein scores are derived from ions scores as a non-probabilistic basis for ranking protein hits.

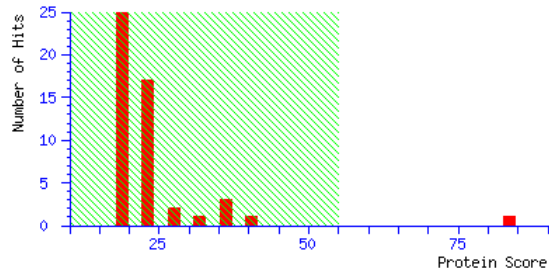

## Protein Summary Report

### Index

|     | Accession                          | Mass  | Score | Description                                                                                                                                       |
|-----|------------------------------------|-------|-------|---------------------------------------------------------------------------------------------------------------------------------------------------|
| 1.  | <u><a href="#">ODO2_MOUSE</a></u>  | 49306 | 84    | Dihydropolyllysine-residue succinyltransferase component of 2-oxoglutarate dehydrogenase complex, mitochondrial OS=Mus musculus GN=Dlst PE=1 SV=1 |
| 2.  | <u><a href="#">RASL2_MOUSE</a></u> | 91087 | 40    | Ras GTPase-activating protein 4 OS=Mus musculus GN=Rasa4 PE=2 SV=1                                                                                |
| 3.  | <u><a href="#">TDGF1_MOUSE</a></u> | 19539 | 36    | Teratocarcinoma-derived growth factor OS=Mus musculus GN=Tdgfl PE=1 SV=1                                                                          |
| 4.  | <u><a href="#">EBP2_MOUSE</a></u>  | 34795 | 35    | Probable rRNA-processing protein EBP2 OS=Mus musculus GN=Ebna1bp2 PE=2 SV=1                                                                       |
| 5.  | <u><a href="#">NLE1_MOUSE</a></u>  | 53628 | 34    | Notchless protein homolog 1 OS=Mus musculus GN=Nle1 PE=2 SV=3                                                                                     |
| 6.  | <u><a href="#">ICAL_MOUSE</a></u>  | 85099 | 31    | Calpastatin OS=Mus musculus GN=Cast PE=1 SV=2                                                                                                     |
| 7.  | <u><a href="#">GLTL1_MOUSE</a></u> | 63721 | 27    | Putative polypeptide N-acetylgalactosaminyltransferase-like protein 1 OS=Mus musculus GN=Galnt11 PE=2 SV=1                                        |
| 8.  | <u><a href="#">SYT1_MOUSE</a></u>  | 47730 | 25    | Synaptotagmin-1 OS=Mus musculus GN=Syt1 PE=1 SV=1                                                                                                 |
| 9.  | <u><a href="#">GLO2_MOUSE</a></u>  | 34519 | 25    | Hydroxyacylglutathione hydrolase, mitochondrial OS=Mus musculus GN=Hagh PE=2 SV=2                                                                 |
| 10. | <u><a href="#">GSTK1_MOUSE</a></u> | 25801 | 24    | Glutathione S-transferase kappa 1 OS=Mus musculus GN=Gstk1 PE=1 SV=3                                                                              |

## Results List

1.

ODO2\_MOUSE Mass: 49306 Score: 84 Expect: 7.1e-005 Matches: 6

Dihydrolypoyllysine-residue succinyltransferase component of 2-oxoglutarate dehydrogenase complex, mitochondrial OS=Mus musculus  
GN=D1st PE=1 SV=1

| Observed  | Mr(expt)  | Mr(calc)  | ppm    | Start | End   | Miss | Ions | Peptide                      |
|-----------|-----------|-----------|--------|-------|-------|------|------|------------------------------|
| 1189.6680 | 1188.6607 | 1188.6503 | 8.78   | 135   | - 145 | 0    | ---  | K.VEGGTPLFTLR.K              |
| 1419.7576 | 1418.7503 | 1418.7405 | 6.87   | 314   | - 326 | 0    | 34   | R.DYIDISVAVATPR.G            |
| 1454.6781 | 1453.6708 | 1453.6507 | 13.8   | 335   | - 346 | 0    | ---  | R.NVETMNYADIER.T             |
| 1979.9956 | 1978.9883 | 1978.9757 | 6.35   | 411   | - 426 | 0    | ---  | K.VEVRPMMYVALTYDHR.L         |
| 2248.0877 | 2247.0805 | 2247.1019 | -9.56  | 69    | - 89  | 0    | ---  | K.NDVITVQTPAFAESVTEGDVR.W    |
| 2691.2968 | 2690.2896 | 2690.3188 | -10.86 | 69    | - 92  | 1    | ---  | K.NDVITVQTPAFAESVTEGDVRWEK.A |

No match to: 871.3026, 946.5851, 1167.6630, 1268.6204, 1338.8396, 1371.8134, 1587.8222, 1666.0132, 2748.3054

2. RASL2\_MOUSE Mass: 91087 Score: 40 Expect: 1.5 Matches: 6

Ras GTPase-activating protein 4 OS=Mus musculus GN=Rasa4 PE=2 SV=1

| Observed  | Mr(expt)  | Mr(calc)  | ppm    | Start | End   | Miss | Ions | Peptide                            |
|-----------|-----------|-----------|--------|-------|-------|------|------|------------------------------------|
| 946.5851  | 945.5778  | 945.5647  | 13.8   | 312   | - 320 | 0    | ---  | K.LFLGQGLAK.D                      |
| 1419.7576 | 1418.7503 | 1418.7592 | -6.26  | 533   | - 544 | 1    | ---  | R_QGVAQLKDFIMK.L + Acetyl (N-term) |
| 1454.6781 | 1453.6708 | 1453.6759 | -3.53  | 21    | - 33  | 0    | ---  | K.DITGSSDPYCIVK.V                  |
| 1666.0132 | 1665.0059 | 1664.9508 | 33.1   | 417   | - 431 | 1    | ---  | R.AHLVALLSAICRSVRT                 |
| 2691.2968 | 2690.2896 | 2690.3340 | -16.52 | 191   | - 214 | 1    | ---  | K.GASEALLVEAWDWDLVSRNDFLGK.V       |
| 2748.3054 | 2747.2982 | 2747.3304 | -11.72 | 100   | - 123 | 0    | ---  | K.GFSGWTHLVEVDPNEEVQGEIHLR.L       |

No match to: 871.3026, 1167.6630, 1189.6680, 1268.6204, 1338.8396, 1371.8134, 1587.8222, 1979.9956, 2248.0877

3. TDGF1\_MOUSE Mass: 19539 Score: 36 Expect: 4.5 Matches: 3

Teratocarcinoma-derived growth factor OS=Mus musculus GN=Tdglf PE=1 SV=1

| Observed  | Mr(expt)  | Mr(calc)  | ppm    | Start | End   | Miss | Ions | Peptide                                                                   |
|-----------|-----------|-----------|--------|-------|-------|------|------|---------------------------------------------------------------------------|
| 1979.9956 | 1978.9883 | 1979.0476 | -29.99 | 47    | - 64  | 1    | ---  | R.SFQFVPSVGIQNSKSLNK.T                                                    |
| 2691.2968 | 2690.2896 | 2690.3778 | -32.80 | 1     | - 26  | 0    | ---  | -.MGYFSSSVLLVAISSAFEGFPVAGR.D                                             |
| 2748.3054 | 2747.2982 | 2747.2679 | 11.0   | 147   | - 170 | 0    | ---  | R <sub>2</sub> TPCQIPSVTTTFMLAGACFLDMK.V + Acetyl (N-term); Oxidation (M) |

No match to: 871.3026, 946.5851, 1167.6630, 1189.6680, 1268.6204, 1338.8396, 1371.8134, 1419.7576, 1454.6781, 1587.8222, 1666.0132, 2248.0877

4. EBP2\_MOUSE Mass: 34795 Score: 35 Expect: 5 Matches: 4

Probable rRNA-processing protein EBP2 OS=Mus musculus GN=Ebn1bp2 PE=2 SV=1

| Observed  | Mr(expt)  | Mr(calc)  | ppm  | Start | End   | Miss | Ions | Peptide                                                      |
|-----------|-----------|-----------|------|-------|-------|------|------|--------------------------------------------------------------|
| 1189.6680 | 1188.6607 | 1188.6172 | 36.6 | 154   | - 163 | 1    | ---  | K.LQTKQAAMEK.S + Acetyl (N-term)                             |
| 1587.8222 | 1586.8149 | 1586.7940 | 13.2 | 210   | - 222 | 0    | ---  | K.LDFLEGDQKPVER.S + Acetyl (N-term)                          |
| 2248.0877 | 2247.0805 | 2246.9936 | 38.7 | 132   | - 149 | 1    | ---  | K.RPTDYFAEMAKSDQQMQK.I + Acetyl (N-term);<br>2 Oxidation (M) |



2748.3054 2747.2982 2747.3978 -36.26 70 - 94 1 --- R.LDVTLGPVPEVSETQPTPNQDQKK.G

**No match to:** 871.3026, 946.5851, 1167.6630, 1268.6204, 1338.8396, 1371.8134, 1419.7576, 1454.6781, 1666.0132, 1979.9956, 2691.2968

5. NLE1\_MOUSE Mass: 53628 Score: 34 Expect: 5.8 Matches: 4

Notchless protein homolog 1 OS=Mus musculus GN=Nle1 PE=2 SV=3

**Observed Mr(expt) Mr(calc) ppm Start End Miss Ions Peptide**

1268.6204 1267.6131 1267.6044 6.86 128 - 139 0 --- K\_YLASGSGDITVR.F + Acetyl (N-term)

1419.7576 1418.7503 1418.6903 42.3 225 - 237 1 5 K.DGSVRVWDITAGR.C

1587.8222 1586.8149 1586.7722 26.9 1 - 16 0 --- -.MAAAVVEEAAAGDVQR.L

2691.2968 2690.2896 2690.3334 -16.29 102 - 127 1 --- R.AVTRCTSSLEGHSEAVISVAFSPTGK.Y

**No match to:** 871.3026, 946.5851, 1167.6630, 1189.6680, 1338.8396, 1371.8134, 1454.6781, 1666.0132, 1979.9956, 2248.0877, 2748.3054

6. ICAL\_MOUSE Mass: 85099 Score: 31 Expect: 12 Matches: 5

Calpastatin OS=Mus musculus GN=Cast PE=1 SV=2

**Observed Mr(expt) Mr(calc) ppm Start End Miss Ions Peptide**

1167.6630 1166.6557 1166.6659 -8.75 706 - 715 1 --- K.DKPEKPPTKK.T

1189.6680 1188.6607 1188.6139 39.4 279 - 288 1 --- K.EGTIPPEYRK.L

1979.9956 1978.9883 1978.9960 -3.88 113 - 129 1 --- K\_TESKKPQSSEQPVVHEK.K + Acetyl (N-term)

2248.0877 2247.0805 2247.0880 -3.34 22 - 41 1 --- R\_HTQEHVNEKNIGSSSKPGEK.K + Acetyl (N-term)

2748.3054 2747.2982 2747.3250 -9.76 505 - 530 1 --- K\_GVVPEDAVETLAGSLGTREADPEHEK.T + Acetyl (N-term)

**No match to:** 871.3026, 946.5851, 1268.6204, 1338.8396, 1371.8134, 1419.7576, 1454.6781, 1587.8222, 1666.0132, 2691.2968

7. GLTL1\_MOUSE Mass: 63721 Score: 27 Expect: 33 Matches: 4

Putative polypeptide N-acetylgalactosaminyltransferase-like protein 1 OS=Mus musculus GN=Galnt11 PE=2 SV=1

**Observed Mr(expt) Mr(calc) ppm Start End Miss Ions Peptide**

1371.8134 1370.8061 1370.7810 18.4 289 - 301 0 --- R\_TPVIAGGIFVIDK.S + Acetyl (N-term)

1587.8222 1586.8149 1586.7729 26.5 380 - 392 0 --- K\_QYYVEARPSAIGK.A + Acetyl (N-term)

2248.0877 2247.0805 2247.1436 -28.12 466 - 485 0 --- K.SPPPAQAWLFSDDLIIQQGK.C

2691.2968 2690.2896 2690.2575 11.9 437 - 461 0 --- K.QGVNCLESQGQNTAGDLLLGMGICR.G

**No match to:** 871.3026, 946.5851, 1167.6630, 1189.6680, 1268.6204, 1338.8396, 1419.7576, 1454.6781, 1666.0132, 1979.9956, 2748.3054

8. SYT1\_MOUSE Mass: 47730 Score: 25 Expect: 48 Matches: 4

Synaptotagmin-1 OS=Mus musculus GN=Syt1 PE=1 SV=1

**Observed Mr(expt) Mr(calc) ppm Start End Miss Ions Peptide**

1268.6204 1267.6131 1267.5768 28.7 389 - 398 0 --- R\_HWSDMLANPR.R + Acetyl (N-term)

1419.7576 1418.7503 1418.7657 -10.88 355 - 366 0 --- K\_VQVVVTVLDYDK.I + Acetyl (N-term)

1454.6781 1453.6708 1453.7201 -33.95 376 - 388 0 --- K\_VFVGYNSTGAELR.H + Acetyl (N-term)

2691.2968 2690.2896 2690.4214 -48.99 399 - 421 1 --- R.RPIAQWHFLQVEEVDAMLA VKK.-

**No match to:** 871.3026, 946.5851, 1167.6630, 1189.6680, 1338.8396, 1371.8134, 1587.8222, 1666.0132, 1979.9956, 2248.0877, 2748.3054

9. GLO2\_MOUSE Mass: 34519 Score: 25 Expect: 53 Matches: 3

Hydroxyacylglutathione hydrolase, mitochondrial OS=Mus musculus GN=Hagh PE=2 SV=2

**Observed Mr(expt) Mr(calc) ppm Start End Miss Ions Peptide**

|           |           |           |       |     |   |     |   |     |                                                                        |
|-----------|-----------|-----------|-------|-----|---|-----|---|-----|------------------------------------------------------------------------|
| 1189.6680 | 1188.6607 | 1188.6172 | 36.6  | 42  | - | 51  | 0 | --- | K.NLTVQQDIMK.V                                                         |
| 2248.0877 | 2247.0805 | 2247.0994 | -8.43 | 212 | - | 230 | 1 | --- | R.LPPDTKVYCGHEYTVNNLK.F                                                |
| 2691.2968 | 2690.2896 | 2690.2574 | 12.0  | 253 | - | 275 | 0 | --- | <u>K.YAIGEPTVPSTLAEETFYNPFMR.V</u> + Acetyl<br>(N-term); Oxidation (M) |

**No match to:** 871.3026, 946.5851, 1167.6630, 1268.6204, 1338.8396, 1371.8134, 1419.7576, 1454.6781, 1587.8222, 1666.0132, 1979.9956, 2748.3054

**10. GSTK1\_MOUSE Mass: 25801 Score: 24 Expect: 60 Matches: 3**

Glutathione S-transferase kappa 1 OS=Mus musculus GN=Gstk1 PE=1 SV=3

| Observed  | Mr(expt)  | Mr(calc)  | ppm    | Start | End | Miss | Ions | Peptide                                                       |
|-----------|-----------|-----------|--------|-------|-----|------|------|---------------------------------------------------------------|
| 1268.6204 | 1267.6131 | 1267.5979 | 12.0   | 50    | -   | 61   | 0    | --- K.DSGNQPPAMVPR.K                                          |
| 1454.6781 | 1453.6708 | 1453.6983 | -18.97 | 50    | -   | 62   | 1    | --- <u>K.DSGNQPPAMVPRK.G</u> + Acetyl (N-term); Oxidation (M) |
| 2748.3054 | 2747.2982 | 2747.3589 | -22.10 | 168   | -   | 193  | 1    | --- K.LIENTDAACKYGAFGLPTTVAHVDGK.T                            |

**No match to:** 871.3026, 946.5851, 1167.6630, 1189.6680, 1338.8396, 1371.8134, 1419.7576, 1587.8222, 1666.0132, 1979.9956, 2248.0877, 2691.2968

**Search Parameters**

**Type of search** : MS/MS Ion Search

**Enzyme** : Trypsin

**Fixed modifications** : Carbamidomethyl (C)

**Variable modifications** : Acetyl (N-term), Oxidation (M)

**Mass values** : Monoisotopic

**Protein Mass** : Unrestricted

**Peptide Mass Tolerance** : ±50 ppm

**Fragment Mass Tolerance** : ±0.5 Da

**Max Missed Cleavages** : 1

**Instrument type** : MALDI-TOF-TOF

**Query1 (871.3026,1+)** : <no title>

**Query2 (946.5851,1+)** : <no title>

**Query3 (1167.6630,1+)** : <no title>

**Query4 (1189.6680,1+)** : <no title>

**Query5 (1268.6204,1+)** : <no title>

**Query6 (1338.8396,1+)** : <no title>

**Query7 (1371.8134,1+)** : <no title>

**Query8 (1419.7576,1+)** : <no title>

**Query9 (1454.6781,1+)** : <no title>

**Query10 (1587.8222,1+)** : <no title>

**Query11 (1666.0132,1+)** : <no title>

**Query12 (1979.9956,1+)** : <no title>

**Query13 (2248.0877,1+)** : <no title>

**Query14 (2691.2968,1+)** : <no title>

**Query15 (2748.3054,1+)** : <no title>

**Mascot:** <http://www.matrixscience.com/>

# **MASCOT** Mascot Search Results **SCIENCE**

User :  
 Email :  
 Search title : Auto submitted by BioTools  
 Database : SwissProt 57.15 (515203 sequences; 181334896 residues)  
 Taxonomy : Mus musculus (house mouse) (16230 sequences)  
 Timestamp : 20 Jun 2013 at 07:31:47 GMT  
 Warning : A Peptide summary report will usually give a much clearer picture of MS/MS search results.  
 Top Score : 238 for K2C8\_MOUSE, Keratin, type II cytoskeletal 8 OS=Mus musculus GN=Krt8 PE=1 SV=4

## Mascot Score Histogram

Protein score is  $-10 \cdot \log(P)$ , where P is the probability that the observed match is a random event.

Protein scores greater than 55 are significant ( $p < 0.05$ ).

Protein scores are derived from ions scores as a non-probabilistic basis for ranking protein hits.

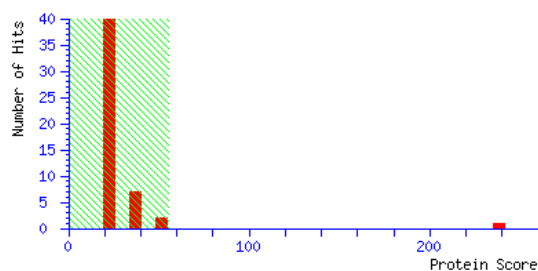

## Protein Summary Report

### Index

| Accession                       | Mass   | Score | Description                                                                    |
|---------------------------------|--------|-------|--------------------------------------------------------------------------------|
| 1. <a href="#">K2C8_MOUSE</a>   | 54531  | 238   | Keratin, type II cytoskeletal 8 OS=Mus musculus GN=Krt8 PE=1 SV=4              |
| 2. <a href="#">PRAM_MOUSE</a>   | 75844  | 47    | PML-RARA-regulated adapter molecule 1 OS=Mus musculus GN=Pram1 PE=1 SV=1       |
| 3. <a href="#">K2C71_MOUSE</a>  | 57860  | 45    | Keratin, type II cytoskeletal 71 OS=Mus musculus GN=Krt71 PE=1 SV=1            |
| 4. <a href="#">SPI2_MOUSE</a>   | 45861  | 42    | Serpin I2 OS=Mus musculus GN=Serpini2 PE=1 SV=1                                |
| 5. <a href="#">MYT1L_MOUSE</a>  | 135041 | 36    | Myelin transcription factor 1-like protein OS=Mus musculus GN=Myt11 PE=2 SV=2  |
| 6. <a href="#">RDH13_MOUSE</a>  | 36726  | 33    | Retinol dehydrogenase 13 OS=Mus musculus GN=Rdh13 PE=2 SV=1                    |
| 7. <a href="#">CC112_MOUSE</a>  | 52745  | 31    | Coiled-coil domain-containing protein 112 OS=Mus musculus GN=Ccdc112 PE=2 SV=2 |
| 8. <a href="#">GDF9_MOUSE</a>   | 50358  | 31    | Growth/differentiation factor 9 OS=Mus musculus GN=Gdf9 PE=2 SV=2              |
| 9. <a href="#">K1C19_MOUSE</a>  | 44515  | 30    | Keratin, type I cytoskeletal 19 OS=Mus musculus GN=Krt19 PE=2 SV=1             |
| 10. <a href="#">PLIN1_MOUSE</a> | 55904  | 30    | Perilipin-1 OS=Mus musculus GN=Plin1 PE=1 SV=2                                 |

## Results List

1. [K2C8\\_MOUSE](#) Mass: 54531 Score: 238 Expect: 2.6e-020 Matches: 18

Keratin, type II cytoskeletal 8 OS=Mus musculus GN=Krt8 PE=1 SV=4

| Observed  | Mr(expt)  | Mr(calc)  | ppm    | Start | End   | Miss | Ions | Peptide                          |
|-----------|-----------|-----------|--------|-------|-------|------|------|----------------------------------|
| 868.4658  | 867.4586  | 867.4311  | 31.7   | 302   | - 308 | 1    | ---  | K.HGDDLRR.T                      |
| 932.4739  | 931.4666  | 931.4610  | 5.97   | 400   | - 407 | 0    | ---  | K.LLEGEESR.L                     |
| 1053.5428 | 1052.5355 | 1052.5250 | 9.95   | 232   | - 239 | 0    | ---  | R.QIHEEEIR.E                     |
| 1079.4970 | 1078.4898 | 1078.5043 | -13.48 | 271   | - 279 | 0    | ---  | R.AQYEDIANR.S                    |
| 1082.5796 | 1081.5723 | 1081.5920 | -18.26 | 108   | - 116 | 1    | ---  | K.FASFIDKVR.F                    |
| 1113.6071 | 1112.5998 | 1112.6189 | -17.20 | 359   | - 368 | 0    | 15   | K.LAELEAALQR.A                   |
| 1208.5919 | 1207.5847 | 1207.5867 | -1.65  | 309   | - 318 | 1    | ---  | R.TKTEISEMNR.N                   |
| 1253.6564 | 1252.6491 | 1252.6775 | -22.68 | 84    | - 94  | 0    | ---  | K.LEVDPNIQAVR.T                  |
| 1318.6479 | 1317.6406 | 1317.6598 | -14.58 | 259   | - 270 | 0    | 34   | R.SLDMDGIIAEVR.A                 |
| 1334.6706 | 1333.6633 | 1333.6548 | 6.40   | 259   | - 270 | 0    | ---  | R.SLDMDGIIAEVR.A + Oxidation (M) |
| 1344.6612 | 1343.6539 | 1343.6681 | -10.50 | 335   | - 347 | 0    | ---  | R.ASLEAAIADAEQR.G                |
| 1355.7412 | 1354.7339 | 1354.7568 | -16.90 | 323   | - 334 | 1    | ---  | R.LQAEIEALKGQR.A                 |
| 1419.7340 | 1418.7267 | 1418.7405 | -9.76  | 220   | - 231 | 0    | 36   | R.LEGLTDEINFLR.Q                 |
| 1426.7080 | 1425.7007 | 1425.6922 | 5.99   | 280   | - 291 | 1    | ---  | R.SRAEAETMYQIK.Y                 |
| 1435.8002 | 1434.7929 | 1434.8082 | -10.65 | 388   | - 399 | 1    | ---  | K.LALDIEITTYRK.L                 |
| 1797.8345 | 1796.8272 | 1796.8250 | 1.22   | 205   | - 219 | 1    | ---  | K.DVDEAYMNKVELESR.L              |
| 1973.9912 | 1972.9839 | 1972.9887 | -2.43  | 335   | - 353 | 1    | ---  | R.ASLEAAIADAEQRGEMAIK.D          |
| 2109.0014 | 2107.9942 | 2108.0056 | -5.40  | 240   | - 258 | 0    | ---  | R.ELQSQISDTSVVLMDNSR.S           |

**No match to:** 995.6173, 1011.6164, 1029.5812, 1041.5766, 1148.6981, 1266.7140, 1303.6221, 1328.6632, 1330.6862, 1365.7061, 1401.7146, 1406.7604, 1447.7314, 1461.7788, 1471.7802, 1484.7771, 1497.7773, 1508.8584, 1572.8528

**2. PRAM\_MOUSE Mass: 75844 Score: 47 Expect: 0.31 Matches: 8**

PML-RARA-regulated adapter molecule 1 OS=Mus musculus GN=Pram1 PE=1 SV=1

| Observed  | Mr(expt)  | Mr(calc)  | ppm    | Start | End   | Miss | Ions | Peptide                          |
|-----------|-----------|-----------|--------|-------|-------|------|------|----------------------------------|
| 1082.5796 | 1081.5723 | 1081.6033 | -28.64 | 378   | - 386 | 1    | ---  | R.KFLQPQHGK.F                    |
| 1208.5919 | 1207.5847 | 1207.5689 | 13.0   | 599   | - 608 | 1    | ---  | K.MMIDPNAKTR.R + 2 Oxidation (M) |
| 1266.7140 | 1265.7068 | 1265.7132 | -5.08  | 105   | - 115 | 0    | ---  | R.KPLHPEFTGLK.K                  |
| 1303.6221 | 1302.6149 | 1302.6456 | -23.58 | 40    | - 50  | 0    | ---  | K.FPQTESEQPK.K                   |
| 1330.6862 | 1329.6789 | 1329.6598 | 14.3   | 330   | - 341 | 1    | ---  | R.ASSEPEVCCKVPK.K                |
| 1419.7340 | 1418.7267 | 1418.7630 | -25.60 | 318   | - 329 | 1    | ---  | K.KHPQLQPSDLTR.A                 |
| 1447.7314 | 1446.7241 | 1446.7871 | -43.55 | 587   | - 598 | 1    | ---  | K.FKFEGEIVHTK.M                  |
| 1797.8345 | 1796.8272 | 1796.8581 | -17.18 | 247   | - 262 | 0    | ---  | R.ELDSHSPQPDISTFPK.N             |

**No match to:** 868.4658, 932.4739, 995.6173, 1011.6164, 1029.5812, 1041.5766, 1053.5428, 1079.4970, 1113.6071, 1148.6981, 1253.6564, 1318.6479, 1328.6632, 1334.6706, 1344.6612, 1355.7412, 1365.7061, 1401.7146, 1406.7604, 1426.7080, 1435.8002, 1461.7788, 1471.7802, 1484.7771, 1497.7773, 1508.8584, 1572.8528, 1973.9912, 2109.0014

**3. K2C71\_MOUSE Mass: 57860 Score: 45 Expect: 0.51 Matches: 7**

Keratin, type II cytoskeletal 71 OS=Mus musculus GN=Krt71 PE=1 SV=1

| Observed  | Mr(expt)  | Mr(calc)  | ppm    | Start | End   | Miss | Ions | Peptide         |
|-----------|-----------|-----------|--------|-------|-------|------|------|-----------------|
| 932.4739  | 931.4666  | 931.4723  | -6.11  | 384   | - 392 | 1    | ---  | R.GDSALKDAR.A   |
| 1082.5796 | 1081.5723 | 1081.5920 | -18.26 | 142   | - 150 | 1    | ---  | K.FASFIDKVR.F   |
| 1318.6479 | 1317.6406 | 1317.6888 | -36.57 | 344   | - 354 | 1    | 2    | K.NTKNEITELTR.F |

1401.7146 1400.7073 1400.7147 -5.30 295 - 306 0 --- R.NLDLDSIIDEVR.A  
 1572.8528 1571.8455 1571.7687 48.9 412 - 423 1 --- R.MLREYQELMSLK.L + 2 Oxidation (M)  
 1797.8345 1796.8272 1796.9169 -49.92 328 - 343 1 --- K.FQELQLAAGRHGDDLK.N  
 1973.9912 1972.9839 1972.9425 21.0 55 - 74 1 --- R.SITLNMASGSGKNGGFGFGR.N + Oxidation (M)

**No match to:** 868.4658, 995.6173, 1011.6164, 1029.5812, 1041.5766, 1053.5428, 1079.4970, 1113.6071, 1148.6981, 1208.5919, 1253.6564, 1266.7140, 1303.6221, 1328.6632, 1330.6862, 1334.6706, 1344.6612, 1355.7412, 1365.7061, 1406.7604, 1419.7340, 1426.7080, 1435.8002, 1447.7314, 1461.7788, 1471.7802, 1484.7771, 1497.7773, 1508.8584, 2109.0014

4. SPI2\_MOUSE Mass: 45861 Score: 42 Expect: 1 Matches: 6

Serpin I2 OS=Mus musculus GN=Serpini2 PE=1 SV=1

| Observed  | Mr(expt)  | Mr(calc)  | ppm    | Start | End   | Miss | Ions | Peptide                          |
|-----------|-----------|-----------|--------|-------|-------|------|------|----------------------------------|
| 1041.5766 | 1040.5693 | 1040.5212 | 46.2   | 380   | - 388 | 0    | ---  | R.TESILFMGK.V + Oxidation (M)    |
| 1208.5919 | 1207.5847 | 1207.5941 | -7.80  | 207   | - 217 | 1    | ---  | K.DGSTVKVPMMK.A + Oxidation (M)  |
| 1330.6862 | 1329.6789 | 1329.6889 | -7.50  | 389   | - 400 | 1    | ---  | K.VTDPDIQTTKGR.D                 |
| 1344.6612 | 1343.6539 | 1343.5915 | 46.5   | 196   | - 206 | 1    | ---  | K.EDTEMTDFTKK.D                  |
| 1447.7314 | 1446.7241 | 1446.7653 | -28.49 | 377   | - 388 | 1    | ---  | K.HIRTESILFMGK.V + Oxidation (M) |
| 1797.8345 | 1796.8272 | 1796.8767 | -27.53 | 162   | - 176 | 1    | ---  | K.IKNMFSEEEFGLTR.L               |

**No match to:** 868.4658, 932.4739, 995.6173, 1011.6164, 1029.5812, 1053.5428, 1079.4970, 1082.5796, 1113.6071, 1148.6981, 1253.6564, 1266.7140, 1303.6221, 1318.6479, 1328.6632, 1334.6706, 1355.7412, 1365.7061, 1401.7146, 1406.7604, 1419.7340, 1426.7080, 1435.8002, 1461.7788, 1471.7802, 1484.7771, 1497.7773, 1508.8584, 1572.8528, 1973.9912, 2109.0014

5. MYT1L\_MOUSE Mass: 135041 Score: 36 Expect: 4.6 Matches: 7

Myelin transcription factor 1-like protein OS=Mus musculus GN=Myt1l PE=2 SV=2

| Observed  | Mr(expt)  | Mr(calc)  | ppm    | Start | End    | Miss | Ions | Peptide                          |
|-----------|-----------|-----------|--------|-------|--------|------|------|----------------------------------|
| 1208.5919 | 1207.5847 | 1207.5721 | 10.4   | 670   | - 680  | 1    | ---  | R.DISPKGYDDAK.R                  |
| 1318.6479 | 1317.6406 | 1317.6048 | 27.2   | 1056  | - 1067 | 0    | ---  | R.ASNGIENDEEIK.Q                 |
| 1334.6706 | 1333.6633 | 1333.7275 | -48.15 | 1042  | - 1053 | 1    | ---  | K.AKLSGEQMLTIK.Q + Oxidation (M) |
| 1365.7061 | 1364.6989 | 1364.6540 | 32.8   | 1028  | - 1040 | 1    | ---  | R.SLSGCPRATSAMK.K                |
| 1419.7340 | 1418.7267 | 1418.7551 | -20.05 | 1044  | - 1055 | 1    | 7    | K.LSGEQMLTIKQR.A + Oxidation (M) |
| 1447.7314 | 1446.7241 | 1446.7202 | 2.68   | 248   | - 260  | 0    | ---  | K.SELSLLDSDVVR.E                 |
| 2109.0014 | 2107.9942 | 2108.0307 | -17.31 | 1092  | - 1109 | 1    | ---  | R.TQITMESNLKTIEEENK.V            |

**No match to:** 868.4658, 932.4739, 995.6173, 1011.6164, 1029.5812, 1041.5766, 1053.5428, 1079.4970, 1082.5796, 1113.6071, 1148.6981, 1253.6564, 1266.7140, 1303.6221, 1328.6632, 1330.6862, 1344.6612, 1355.7412, 1401.7146, 1406.7604, 1426.7080, 1435.8002, 1461.7788, 1471.7802, 1484.7771, 1497.7773, 1508.8584, 1572.8528, 1797.8345, 1973.9912

6. RDH13\_MOUSE Mass: 36726 Score: 33 Expect: 7.4 Matches: 5

Retinol dehydrogenase 13 OS=Mus musculus GN=Rdh13 PE=2 SV=1

| Observed  | Mr(expt)  | Mr(calc)  | ppm    | Start | End   | Miss | Ions | Peptide                          |
|-----------|-----------|-----------|--------|-------|-------|------|------|----------------------------------|
| 1029.5812 | 1028.5739 | 1028.5978 | -23.26 | 53    | - 61  | 1    | ---  | K.QTALELAKR.G                    |
| 1041.5766 | 1040.5693 | 1040.5727 | -3.21  | 84    | - 92  | 1    | ---  | R.GETLNPRVR.A                    |
| 1330.6862 | 1329.6789 | 1329.7075 | -21.49 | 118   | - 129 | 0    | ---  | R.VDILVNNAAVMR.C + Oxidation (M) |
| 1334.6706 | 1333.6633 | 1333.5972 | 49.5   | 194   | - 204 | 1    | ---  | K.YDTKAAAYCQSK.L                 |
| 2109.0014 | 2107.9942 | 2108.0949 | -47.79 | 309   | - 328 | 1    | ---  | R.LWTESARLVGLAMAHGSPGR.G         |

**No match to:** 868.4658, 932.4739, 995.6173, 1011.6164, 1053.5428, 1079.4970, 1082.5796, 1113.6071, 1148.6981, 1208.5919, 1253.6564, 1266.7140, 1303.6221, 1318.6479, 1328.6632, 1344.6612, 1355.7412, 1365.7061, 1401.7146, 1406.7604, 1419.7340, 1426.7080, 1435.8002, 1447.7314, 1461.7788, 1471.7802, 1484.7771, 1497.7773, 1508.8584, 1572.8528, 1797.8345, 1973.9912

**7. CC112\_MOUSE Mass: 52745 Score: 31 Expect: 13 Matches: 6**

Coiled-coil domain-containing protein 112 OS=Mus musculus GN=Ccdc112 PE=2 SV=2

**Observed Mr(expt) Mr(calc) ppm Start End Miss Ions Peptide**

995.6173 994.6101 994.5811 29.1 362 - 369 1 --- R.DLHKLELK.I  
1041.5766 1040.5693 1040.5767 -7.08 434 - 442 1 --- R.AIPTWRQGL-  
1318.6479 1317.6406 1317.6816 -31.12 145 - 155 0 --- R.TLPEQVVEFEK.F  
1406.7604 1405.7532 1405.7677 -10.37 316 - 326 1 --- K.LLLESYTQRR.E  
1484.7771 1483.7698 1483.7711 -0.84 210 - 220 1 --- K.WYQKFLTLEEK.K  
1797.8345 1796.8272 1796.9156 -49.18 246 - 262 1 --- K.VDTVPLPSQSKAEDSPK.Q

**No match to:** 868.4658, 932.4739, 1011.6164, 1029.5812, 1053.5428, 1079.4970, 1082.5796, 1113.6071, 1148.6981, 1208.5919, 1253.6564, 1266.7140, 1303.6221, 1328.6632, 1330.6862, 1334.6706, 1344.6612, 1355.7412, 1365.7061, 1401.7146, 1419.7340, 1426.7080, 1435.8002, 1447.7314, 1461.7788, 1471.7802, 1497.7773, 1508.8584, 1572.8528, 1973.9912, 2109.0014

**8. GDF9\_MOUSE Mass: 50358 Score: 31 Expect: 14 Matches: 5**

Growth/differentiation factor 9 OS=Mus musculus GN=Gd9 PE=2 SV=2

**Observed Mr(expt) Mr(calc) ppm Start End Miss Ions Peptide**

932.4739 931.4666 931.4837 -18.34 85 - 91 1 --- R.ALYYMKK.L + Oxidation (M)  
1041.5766 1040.5693 1040.5688 0.48 147 - 155 0 --- R.VTAMEHLLK.S  
1406.7604 1405.7532 1405.7024 36.1 223 - 234 0 --- R.SIHLSVNFTCTK.D  
1484.7771 1483.7698 1483.7493 13.8 79 - 90 1 --- K.LQPDSRALYYMK.K  
1508.8584 1507.8512 1507.7817 46.1 397 - 410 0 --- K.LDPSVPRPSCVPGK.Y

**No match to:** 868.4658, 995.6173, 1011.6164, 1029.5812, 1053.5428, 1079.4970, 1082.5796, 1113.6071, 1148.6981, 1208.5919, 1253.6564, 1266.7140, 1303.6221, 1318.6479, 1328.6632, 1330.6862, 1334.6706, 1344.6612, 1355.7412, 1365.7061, 1401.7146, 1419.7340, 1426.7080, 1435.8002, 1447.7314, 1461.7788, 1471.7802, 1497.7773, 1572.8528, 1797.8345, 1973.9912, 2109.0014

**9. K1C19\_MOUSE Mass: 44515 Score: 30 Expect: 14 Matches: 5**

Keratin, type I cytoskeletal 19 OS=Mus musculus GN=Krt19 PE=2 SV=1

**Observed Mr(expt) Mr(calc) ppm Start End Miss Ions Peptide**

1029.5812 1028.5739 1028.5866 -12.35 192 - 200 0 --- R.VLDELTLART  
1041.5766 1040.5693 1040.5978 -27.38 154 - 162 0 --- K.IVLQIDNAR.L  
1303.6221 1302.6149 1302.6205 -4.30 52 - 64 0 --- R.FVTSSSGSYGGVR.G  
1365.7061 1364.6989 1364.7048 -4.35 374 - 384 1 --- K.SRLEQEIATYR.S  
1973.9912 1972.9839 1973.0615 -39.32 304 - 320 1 --- R.RTLQGLEIELQSLSMK.A

**No match to:** 868.4658, 932.4739, 995.6173, 1011.6164, 1053.5428, 1079.4970, 1082.5796, 1113.6071, 1148.6981, 1208.5919, 1253.6564, 1266.7140, 1318.6479, 1328.6632, 1330.6862, 1334.6706, 1344.6612, 1355.7412, 1401.7146, 1406.7604, 1419.7340, 1426.7080, 1435.8002, 1447.7314, 1461.7788, 1471.7802, 1484.7771, 1497.7773, 1508.8584, 1572.8528, 1797.8345, 2109.0014

**10. PLIN1\_MOUSE Mass: 55904 Score: 30 Expect: 15 Matches: 5**

Perilipin-1 OS=Mus musculus GN=Plin1 PE=1 SV=2

| Observed                                                                                                                                                                                                                                                                                                                                                                        | Mr(expt)  | Mr(calc)  | ppm    | Start | End | Miss | Ions | Peptide                                   |
|---------------------------------------------------------------------------------------------------------------------------------------------------------------------------------------------------------------------------------------------------------------------------------------------------------------------------------------------------------------------------------|-----------|-----------|--------|-------|-----|------|------|-------------------------------------------|
| 1303.6221                                                                                                                                                                                                                                                                                                                                                                       | 1302.6149 | 1302.6391 | -18.57 | 231   | -   | 241  | 0    | --- R.HTMQTTAWALK.Q + Oxidation (M)       |
| 1318.6479                                                                                                                                                                                                                                                                                                                                                                       | 1317.6406 | 1317.6776 | -28.06 | 129   | -   | 141  | 0    | --- R.NSISVPIASTSDK.V                     |
| 1344.6612                                                                                                                                                                                                                                                                                                                                                                       | 1343.6539 | 1343.6317 | 16.6   | 420   | -   | 431  | 1    | --- R.DIDNPSAEAERK.G                      |
| 1401.7146                                                                                                                                                                                                                                                                                                                                                                       | 1400.7073 | 1400.7511 | -31.26 | 172   | -   | 186  | 0    | --- R.LASGGADLALGSIEK.V                   |
| 2109.0014                                                                                                                                                                                                                                                                                                                                                                       | 2107.9942 | 2108.0837 | -42.47 | 490   | -   | 507  | 1    | --- R.RVSDSFFRPSVMEPIGR.A + Oxidation (M) |
| <b>No match to:</b> 868.4658, 932.4739, 995.6173, 1011.6164, 1029.5812, 1041.5766, 1053.5428, 1079.4970, 1082.5796, 1113.6071, 1148.6981, 1208.5919, 1253.6564, 1266.7140, 1328.6632, 1330.6862, 1334.6706, 1355.7412, 1365.7061, 1406.7604, 1419.7340, 1426.7080, 1435.8002, 1447.7314, 1461.7788, 1471.7802, 1484.7771, 1497.7773, 1508.8584, 1572.8528, 1797.8345, 1973.9912 |           |           |        |       |     |      |      |                                           |

#### Search Parameters

**Type of search** : MS/MS Ion Search  
**Enzyme** : Trypsin  
**Fixed modifications** : Carbamidomethyl (C)  
**Variable modifications** : Oxidation (M)  
**Mass values** : Monoisotopic  
**Protein Mass** : Unrestricted  
**Peptide Mass Tolerance** :  $\pm 50$  ppm  
**Fragment Mass Tolerance**:  $\pm 0.6$  Da  
**Max Missed Cleavages** : 1  
**Instrument type** : MALDI-TOF-TOF  
**Query1 (868.4658,1+)** : <no title>  
**Query2 (932.4739,1+)** : <no title>  
**Query3 (995.6173,1+)** : <no title>  
**Query4 (1011.6164,1+)** : <no title>  
**Query5 (1029.5812,1+)** : <no title>  
**Query6 (1041.5766,1+)** : <no title>  
**Query7 (1053.5428,1+)** : <no title>  
**Query8 (1079.4970,1+)** : <no title>  
**Query9 (1082.5796,1+)** : <no title>  
**Query10 (1113.6071,1+)** : <no title>  
**Query11 (1148.6981,1+)** : <no title>  
**Query12 (1208.5919,1+)** : <no title>  
**Query13 (1253.6564,1+)** : <no title>  
**Query14 (1266.7140,1+)** : <no title>  
**Query15 (1303.6221,1+)** : <no title>  
**Query16 (1318.6479,1+)** : <no title>  
**Query17 (1328.6632,1+)** : <no title>  
**Query18 (1330.6862,1+)** : <no title>  
**Query19 (1334.6706,1+)** : <no title>  
**Query20 (1344.6612,1+)** : <no title>  
**Query21 (1355.7412,1+)** : <no title>  
**Query22 (1365.7061,1+)** : <no title>  
**Query23 (1401.7146,1+)** : <no title>



Query24 (1406.7604,1+) : <no title>

Query25 (1419.7340,1+) : <no title>

Query26 (1426.7080,1+) : <no title>

Query27 (1435.8002,1+) : <no title>

Query28 (1447.7314,1+) : <no title>

Query29 (1461.7788,1+) : <no title>

Query30 (1471.7802,1+) : <no title>

Query31 (1484.7771,1+) : <no title>

Query32 (1497.7773,1+) : <no title>

Query33 (1508.8584,1+) : <no title>

Query34 (1572.8528,1+) : <no title>

Query35 (1797.8345,1+) : <no title>

Query36 (1973.9912,1+) : <no title>

Query37 (2109.0014,1+) : <no title>

**Mascot:** <http://www.matrixscience.com/>

# **MASCOT** Mascot Search Results **SCIENCE**

User :  
 Email :  
 Search title : Auto submitted by BioTools  
 Database : SwissProt 57.15 (515203 sequences; 181334896 residues)  
 Taxonomy : Mus. (16281 sequences)  
 Timestamp : 20 May 2013 at 01:33:47 GMT  
 Warning : A Peptide summary report will usually give a much clearer picture of MS/MS search results.  
 Top Score : 285 for K1C18\_MOUSE, Keratin, type I cytoskeletal 18 OS=Mus musculus GN=Krt18 PE=1 SV=5

## Mascot Score Histogram

Protein score is  $-10 \cdot \log(P)$ , where P is the probability that the observed match is a random event.

Protein scores greater than 55 are significant ( $p < 0.05$ ).

Protein scores are derived from ions scores as a non-probabilistic basis for ranking protein hits.

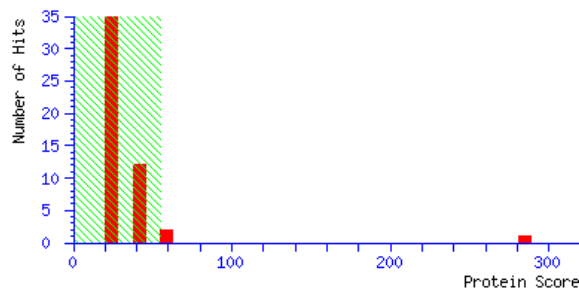

| Protein                        | Summary |       |                                                                                            | ReportIndex |
|--------------------------------|---------|-------|--------------------------------------------------------------------------------------------|-------------|
| Accession                      | Mass    | Score | Description                                                                                |             |
| 1. <a href="#">K1C18_MOUSE</a> | 47509   | 285   | Keratin, type I cytoskeletal 18 OS=Mus musculus GN=Krt18 PE=1 SV=5                         |             |
| 2. <a href="#">RSSA_MOUSE</a>  | 32931   | 64    | 40S ribosomal protein SA OS=Mus musculus GN=Rpsa PE=1 SV=4                                 |             |
| 3. <a href="#">K1C19_MOUSE</a> | 44515   | 56    | Keratin, type I cytoskeletal 19 OS=Mus musculus GN=Krt19 PE=2 SV=1                         |             |
| 4. <a href="#">FYCO1_MOUSE</a> | 164060  | 38    | FYVE and coiled-coil domain-containing protein 1 OS=Mus musculus GN=Fyco1 PE=1 SV=1        |             |
| 5. <a href="#">HS3SB_MOUSE</a> | 43641   | 37    | Heparan sulfate glucosamine 3-O-sulfotransferase 3B1 OS=Mus musculus GN=Hs3st3b1 PE=2 SV=1 |             |
| 6. <a href="#">ARHG3_MOUSE</a> | 60230   | 37    | Rho guanine nucleotide exchange factor 3 OS=Mus musculus GN=Arhgef3 PE=1 SV=1              |             |
| 7. <a href="#">NDKM_MOUSE</a>  | 20707   | 36    | Nucleoside diphosphate kinase, mitochondrial OS=Mus musculus GN=Nme4 PE=1 SV=1             |             |
| 8. <a href="#">CA194_MOUSE</a> | 18977   | 35    | Uncharacterized protein C1orf194 homolog OS=Mus musculus PE=2 SV=1                         |             |
| 9. <a href="#">ALAT1_MOUSE</a> | 55905   | 35    | Alanine aminotransferase 1 OS=Mus musculus GN=Gpt PE=2 SV=3                                |             |
| 10. <a href="#">RM47_MOUSE</a> | 29992   | 35    | 39S ribosomal protein L47, mitochondrial OS=Mus musculus GN=Mrlp47 PE=2 SV=2               |             |

## Results List

1. [K1C18\\_MOUSE](#) Mass: 47509 Score: 285 Expect: 5.1e-025 Matches: 19

Keratin, type I cytoskeletal 18 OS=Mus musculus GN=Krt18 PE=1 SV=5

Observed Mr(expt) Mr(calc) ppm Start End Miss Ions Peptide

|           |           |           |       |           |   |     |                                  |
|-----------|-----------|-----------|-------|-----------|---|-----|----------------------------------|
| 924.5554  | 923.5482  | 923.5188  | 31.8  | 104 - 110 | 1 | --- | K.IREHLEK.K                      |
| 1004.5424 | 1003.5351 | 1003.5046 | 30.4  | 92 - 99   | 1 | --- | K.SLETENRR.L                     |
| 1020.5184 | 1019.5112 | 1019.4884 | 22.4  | 411 - 419 | 0 | --- | R.VVSETNDTR.V                    |
| 1032.5694 | 1031.5621 | 1031.5248 | 36.2  | 181 - 189 | 0 | --- | K.VVDDTNITR.L                    |
| 1041.6334 | 1040.6261 | 1040.5978 | 27.2  | 143 - 151 | 0 | 52  | R.IVLQIDNAR.L                    |
| 1065.5734 | 1064.5661 | 1064.5502 | 15.0  | 366 - 374 | 0 | --- | K.LEAEIATYR.R                    |
| 1121.5294 | 1120.5221 | 1120.4819 | 35.9  | 74 - 82   | 0 | --- | K.ETMQDLNDR.L                    |
| 1148.6002 | 1147.5929 | 1147.5721 | 18.1  | 284 - 293 | 0 | --- | R.DAETTLTEL.R                    |
| 1160.6539 | 1159.6467 | 1159.6197 | 23.2  | 180 - 189 | 1 | --- | R.KVVDDTNITR.L                   |
| 1239.6715 | 1238.6643 | 1238.6329 | 25.3  | 159 - 168 | 1 | 10  | R.VKYETELAMR.Q                   |
| 1240.6244 | 1239.6171 | 1239.6208 | -2.97 | 169 - 179 | 0 | --- | R.QSVESDIHGLR.K                  |
| 1255.6655 | 1254.6583 | 1254.6278 | 24.3  | 159 - 168 | 1 | --- | R.VKYETELAMR.Q + Oxidation (M)   |
| 1281.6652 | 1280.6579 | 1280.6434 | 11.3  | 159 - 168 | 1 | --- | R.VKYETELAMR.Q + Acetyl (N-term) |
| 1292.7494 | 1291.7421 | 1291.7136 | 22.1  | 364 - 374 | 1 | 25  | K.VKLEAEIATYR.R                  |
| 1305.6937 | 1304.6864 | 1304.6473 | 30.0  | 131 - 142 | 0 | 33  | R.AQIFANSVDNAR.I                 |
| 1368.7634 | 1367.7562 | 1367.7157 | 29.6  | 169 - 180 | 1 | --- | R.QSVESDIHGLR.K.V                |
| 1419.7856 | 1418.7783 | 1418.7405 | 26.7  | 352 - 363 | 0 | --- | R.QAQEYALLNIK.V                  |
| 1785.9151 | 1784.9079 | 1784.8653 | 23.9  | 308 - 323 | 0 | 48  | K.NQNINLENSLGDVEAR.Y             |
| 2380.2064 | 2379.1991 | 2379.2216 | -9.46 | 326 - 346 | 0 | --- | K.AQMEQLNGVLLHLESELAQTR.A        |

**No match to:** 834.3310, 912.5618, 1012.5287, 1203.6746, 1223.6482, 1268.6342, 1351.7259, 1441.7466, 1556.8021, 1561.8613, 1571.8028, 1614.8077, 1633.9167, 1673.8781, 1698.8648, 1740.9933, 1799.9349, 2081.0386, 2395.2224, 2691.2733, 2749.3154, 2773.3573, 2784.3592, 2996.4764

**2. RSSA\_MOUSE Mass: 32931 Score: 64 Expect: 0.0058 Matches: 9**

40S ribosomal protein SA OS=Mus musculus GN=Rpsa PE=1 SV=4

| Observed  | Mr(expt)  | Mr(calc)  | ppm    | Start     | End | Miss | Ions                               | Peptide |
|-----------|-----------|-----------|--------|-----------|-----|------|------------------------------------|---------|
| 912.5618  | 911.5546  | 911.5440  | 11.6   | 121 - 128 | 0   | ---  | R.LLVVTDPR.A                       |         |
| 1203.6746 | 1202.6673 | 1202.6408 | 22.1   | 90 - 102  | 0   | ---  | K.FAAATGATPIAGR.F                  |         |
| 1305.6937 | 1304.6864 | 1304.7340 | -36.43 | 42 - 52   | 1   | ---  | R_KSDGIYIINL.K.R + Acetyl (N-term) |         |
| 1614.8077 | 1613.8004 | 1613.7959 | 2.78   | 167 - 180 | 0   | ---  | K.GAHSVGLMWWMLAR.E                 |         |
| 1698.8648 | 1697.8575 | 1697.8526 | 2.92   | 103 - 117 | 0   | ---  | R.FTPGFTFNQIQAAR.E                 |         |
| 1740.9933 | 1739.9860 | 1739.9417 | 25.4   | 64 - 80   | 0   | ---  | R.AIVAIENPADVSVISSR.N              |         |
| 2081.0386 | 2080.0313 | 2080.0490 | -8.50  | 103 - 120 | 1   | ---  | R.FTPGFTFNQIQAAREPR.L              |         |
| 2773.3573 | 2772.3501 | 2772.3694 | -6.96  | 18 - 41   | 1   | ---  | K.FLAAGTHLGGTNLDFQMEQYIYKR.K       |         |
| 2996.4764 | 2995.4691 | 2995.4709 | -0.60  | 129 - 155 | 0   | ---  | R.ADHQPLTEASYVNLPTIALCNTDSPLR.Y    |         |

**No match to:** 834.3310, 924.5554, 1004.5424, 1012.5287, 1020.5184, 1032.5694, 1041.6334, 1065.5734, 1121.5294, 1148.6002, 1160.6539, 1223.6482, 1239.6715, 1240.6244, 1255.6655, 1268.6342, 1281.6652, 1292.7494, 1351.7259, 1368.7634, 1419.7856, 1441.7466, 1556.8021, 1561.8613, 1571.8028, 1633.9167, 1673.8781, 1785.9151, 1799.9349, 2380.2064, 2395.2224, 2691.2733, 2749.3154, 2784.3592

**3. K1C19\_MOUSE Mass: 44515 Score: 56 Expect: 0.038 Matches: 2**

Keratin, type I cytoskeletal 19 OS=Mus musculus GN=Krt19 PE=2 SV=1

| Observed  | Mr(expt)  | Mr(calc)  | ppm  | Start     | End | Miss | Ions                           | Peptide |
|-----------|-----------|-----------|------|-----------|-----|------|--------------------------------|---------|
| 1032.5694 | 1031.5621 | 1031.5433 | 18.2 | 368 - 375 | 1   | ---  | K_QLMDIKSR.L + Acetyl (N-term) |         |
| 1041.6334 | 1040.6261 | 1040.5978 | 27.2 | 154 - 162 | 0   | 52   | K.IVLQIDNAR.L                  |         |

**No match to:** 834.3310, 912.5618, 924.5554, 1004.5424, 1012.5287, 1020.5184, 1065.5734, 1121.5294, 1148.6002, 1160.6539, 1203.6746, 1223.6482, 1239.6715, 1240.6244, 1255.6655, 1268.6342, 1281.6652, 1292.7494, 1305.6937, 1351.7259, 1368.7634, 1419.7856, 1441.7466, 1556.8021, 1561.8613, 1571.8028, 1614.8077, 1633.9167, 1673.8781, 1698.8648, 1740.9933, 1785.9151, 1799.9349, 2081.0386, 2380.2064, 2395.2224, 2691.2733, 2749.3154, 2773.3573, 2784.3592, 2996.4764

**4. FYCO1\_MOUSE Mass: 164060 Score: 38 Expect: 2.8 Matches: 15**

FYVE and coiled-coil domain-containing protein 1 OS=Mus musculus GN=Fyco1 PE=1 SV=1

| Observed  | Mr(expt)  | Mr(calc)  | ppm    | Start | End | Miss | Ions | Peptide                                                          |
|-----------|-----------|-----------|--------|-------|-----|------|------|------------------------------------------------------------------|
| 1020.5184 | 1019.5112 | 1019.4706 | 39.8   | 588   | -   | 595  | 0    | --- K.ELQNMVDR.N + Oxidation (M)                                 |
| 1032.5694 | 1031.5621 | 1031.5248 | 36.2   | 301   | -   | 310  | 0    | --- K.QGDVQATVK.K                                                |
| 1041.6334 | 1040.6261 | 1040.6230 | 3.02   | 1100  | -   | 1107 | 1    | --- R.LIELLRDK.D + Acetyl (N-term)                               |
| 1065.5734 | 1064.5661 | 1064.5138 | 49.1   | 1114  | -   | 1122 | 0    | --- K.SDALEFQQK.L                                                |
| 1121.5294 | 1120.5221 | 1120.5764 | -48.47 | 603   | -   | 611  | 0    | --- K.LQALQTDYK.A + Acetyl (N-term)                              |
| 1148.6002 | 1147.5929 | 1147.6349 | -36.64 | 90    | -   | 98   | 1    | --- R.FVRSISELR.T + Acetyl (N-term)                              |
| 1160.6539 | 1159.6467 | 1159.6197 | 23.2   | 301   | -   | 311  | 1    | --- K.QGDVQATVKK.L                                               |
| 1441.7466 | 1440.7394 | 1440.7824 | -29.87 | 442   | -   | 454  | 1    | --- K.DVVPQEEELSGKK.Q                                            |
| 1556.8021 | 1555.7948 | 1555.7525 | 27.2   | 529   | -   | 540  | 1    | --- K.QLMQERDHLQR.V + Oxidation (M)                              |
| 1614.8077 | 1613.8004 | 1613.8559 | -34.41 | 265   | -   | 278  | 1    | --- R.MLVSRQGGQLQVEK.E + Acetyl (N-term)                         |
| 1673.8781 | 1672.8709 | 1672.8090 | 37.0   | 989   | -   | 1002 | 0    | --- R.AQLEEQQQLQMTK.E + Acetyl (N-term)                          |
| 1698.8648 | 1697.8575 | 1697.9312 | -43.38 | 766   | -   | 780  | 1    | --- R.DKLQSLGVAETVLR.E + Acetyl (N-term)                         |
| 2380.2064 | 2379.1991 | 2379.2243 | -10.60 | 279   | -   | 300  | 0    | --- K.EMGYLAVEDSIGLVSLVAELQK.Q + Oxidation (M)                   |
| 2395.2224 | 2394.2151 | 2394.2139 | 0.54   | 462   | -   | 482  | 1    | --- R.RQLQESLAHLSSVEELAEAR.Q                                     |
| 2691.2733 | 2690.2660 | 2690.2462 | 7.38   | 1013  | -   | 1035 | 1    | --- K.AAMEEKLNCTSSHLAECQATLLR.K + Acetyl (N-term); Oxidation (M) |

**No match to:** 834.3310, 912.5618, 924.5554, 1004.5424, 1012.5287, 1203.6746, 1223.6482, 1239.6715, 1240.6244, 1255.6655, 1268.6342, 1281.6652, 1292.7494, 1305.6937, 1351.7259, 1368.7634, 1419.7856, 1561.8613, 1571.8028, 1633.9167, 1740.9933, 1785.9151, 1799.9349, 2081.0386, 2749.3154, 2773.3573, 2784.3592, 2996.4764

**5. HS3SB\_MOUSE Mass: 43641 Score: 37 Expect: 3 Matches: 10**

Heparan sulfate glucosamine 3-O-sulfotransferase 3B1 OS=Mus musculus GN=Hs3st3b1 PE=2 SV=1

| Observed  | Mr(expt)  | Mr(calc)  | ppm    | Start | End | Miss | Ions | Peptide                                   |
|-----------|-----------|-----------|--------|-------|-----|------|------|-------------------------------------------|
| 1012.5287 | 1011.5214 | 1011.5025 | 18.7   | 201   | -   | 208  | 0    | --- K.TPSYFVTR.E + Acetyl (N-term)        |
| 1148.6002 | 1147.5929 | 1147.6271 | -29.79 | 191   | -   | 200  | 1    | --- R.TLKGQITMEK.T                        |
| 1160.6539 | 1159.6467 | 1159.6019 | 38.6   | 209   | -   | 219  | 1    | --- R.EAPARISAMSK.D                       |
| 1239.6715 | 1238.6643 | 1238.6619 | 1.94   | 92    | -   | 104  | 1    | --- R.APPANSLAAGKDK.T                     |
| 1240.6244 | 1239.6171 | 1239.6030 | 11.4   | 340   | -   | 351  | 0    | --- K.AEGSGKPHCLGK.T                      |
| 1268.6342 | 1267.6270 | 1267.6296 | -2.07  | 234   | -   | 244  | 0    | --- R.AISDYTQTLRK.R + Acetyl (N-term)     |
| 1281.6652 | 1280.6579 | 1280.6724 | -11.31 | 92    | -   | 104  | 1    | --- R.APPANSLAAGKDK.T + Acetyl (N-term)   |
| 1368.7634 | 1367.7562 | 1367.6980 | 42.6   | 339   | -   | 351  | 1    | --- K.KAEGSGKPHCLGK.T                     |
| 1419.7856 | 1418.7783 | 1418.7129 | 46.2   | 180   | -   | 190  | 1    | --- K.GLAWYRDLMPRT + Acetyl (N-term)      |
| 1799.9349 | 1798.9276 | 1798.8924 | 19.6   | 194   | -   | 208  | 1    | --- K.GQITMEKTPSYFVTR.E + Acetyl (N-term) |

**No match to:** 834.3310, 912.5618, 924.5554, 1004.5424, 1020.5184, 1032.5694, 1041.6334, 1065.5734, 1121.5294, 1203.6746, 1223.6482, 1255.6655, 1292.7494, 1305.6937, 1351.7259, 1441.7466, 1556.8021, 1561.8613, 1571.8028, 1614.8077, 1633.9167, 1673.8781, 1698.8648, 1740.9933, 1785.9151, 2081.0386, 2380.2064, 2395.2224, 2691.2733, 2749.3154, 2773.3573, 2784.3592, 2996.4764

6. ARHG3\_MOUSE Mass: 60230 Score: 37 Expect: 3 Matches: 8

Rho guanine nucleotide exchange factor 3 OS=Mus musculus GN=ArhgeB PE=1 SV=1

**Observed Mr(expt) Mr(calc) ppm Start End Miss Ions Peptide**

1121.5294 1120.5221 1120.5625 -36.05 401 - 410 1 --- R.GAFSNNERVK.N  
1240.6244 1239.6171 1239.6571 -32.30 74 - 84 0 --- R.SESRPDILAPR.A  
1419.7856 1418.7783 1418.7405 26.7 314 - 324 1 --- K.ERLLYLEEGQK.D + Acetyl (N-term)  
1441.7466 1440.7394 1440.7222 11.9 229 - 239 1 --- K.QDHRVQDFLQR.C  
1571.8028 1570.7956 1570.8507 -35.12 248 - 259 1 --- R\_lKLDLWNFLDIPR.S + Acetyl (N-term)  
1740.9933 1739.9860 1739.9067 45.6 74 - 88 1 --- R.SESRPDILAPRAWSR.N  
2380.2064 2379.1991 2379.2144 -6.45 102 - 121 1 --- K.LWSETFDVCVNQVLTAKEIK.R  
2996.4764 2995.4691 2995.5210 -17.33 445 - 474 1 --- R.QAKETVLSAAGQAGLLDSEGLVQGPGENR.E

**No match to:** 834.3310, 912.5618, 924.5554, 1004.5424, 1012.5287, 1020.5184, 1032.5694, 1041.6334, 1065.5734, 1148.6002, 1160.6539, 1203.6746, 1223.6482, 1239.6715, 1255.6655, 1268.6342, 1281.6652, 1292.7494, 1305.6937, 1351.7259, 1368.7634, 1556.8021, 1561.8613, 1614.8077, 1633.9167, 1673.8781, 1698.8648, 1785.9151, 1799.9349, 2081.0386, 2395.2224, 2691.2733, 2749.3154, 2773.3573, 2784.3592

7. NDKM\_MOUSE Mass: 20707 Score: 36 Expect: 4.4 Matches: 4

Nucleoside diphosphate kinase, mitochondrial OS=Mus musculus GN=Nme4 PE=1 SV=1

**Observed Mr(expt) Mr(calc) ppm Start End Miss Ions Peptide**

1041.6334 1040.6261 1040.6455 -18.60 51 - 59 1 11 R.RLVGTVIQR.F  
1673.8781 1672.8709 1672.8242 27.9 72 - 85 0 --- K.MLQAPESILAEHYR.D + Oxidation (M)  
1785.9151 1784.9079 1784.8363 40.1 121 - 137 0 --- R\_AMITGTDSTEAPGTIR.G + Acetyl (N-term); Oxidation (M)  
2784.3592 2783.3520 2783.3297 8.00 121 - 146 1 --- R\_AMITGTDSTEAPGTIRGDFSVHISR.N + Acetyl (N-term); Oxidation (M)

**No match to:** 834.3310, 912.5618, 924.5554, 1004.5424, 1012.5287, 1020.5184, 1032.5694, 1065.5734, 1121.5294, 1148.6002, 1160.6539, 1203.6746, 1223.6482, 1239.6715, 1240.6244, 1255.6655, 1268.6342, 1281.6652, 1292.7494, 1305.6937, 1351.7259, 1368.7634, 1419.7856, 1441.7466, 1556.8021, 1561.8613, 1571.8028, 1614.8077, 1633.9167, 1698.8648, 1740.9933, 1799.9349, 2081.0386, 2380.2064, 2395.2224, 2691.2733, 2749.3154, 2773.3573, 2996.4764

8. CA194\_MOUSE Mass: 18977 Score: 35 Expect: 4.7 Matches: 5

Uncharacterized protein C1orf194 homolog OS=Mus musculus PE=2 SV=1

**Observed Mr(expt) Mr(calc) ppm Start End Miss Ions Peptide**

1020.5184 1019.5112 1019.5247 -13.31 47 - 56 0 --- R.LSSTPTATSR.S  
1239.6715 1238.6643 1238.6183 37.1 59 - 68 1 --- R\_DTFFDSKIPK.D + Acetyl (N-term)  
1305.6937 1304.6864 1304.6684 13.8 47 - 58 1 --- R\_LLSSTPTATSRSR.D + Acetyl (N-term)  
1673.8781 1672.8709 1672.8243 27.9 1 - 14 0 --- \_MLQPQETFSNPALR.D + Acetyl (N-term)  
2691.2733 2690.2660 2690.3161 -18.60 33 - 56 1 --- K.NPAHLAQQDPWSRSLSTPTATSR.S + Acetyl (N-term)

**No match to:** 834.3310, 912.5618, 924.5554, 1004.5424, 1012.5287, 1032.5694, 1041.6334, 1065.5734, 1121.5294, 1148.6002, 1160.6539, 1203.6746, 1223.6482, 1240.6244, 1255.6655, 1268.6342, 1281.6652, 1292.7494, 1351.7259, 1368.7634, 1419.7856, 1441.7466, 1556.8021, 1561.8613, 1571.8028, 1614.8077, 1633.9167, 1698.8648, 1740.9933, 1785.9151, 1799.9349, 2081.0386, 2380.2064, 2395.2224, 2749.3154, 2773.3573, 2784.3592, 2996.4764

9. ALAT1\_MOUSE Mass: 55905 Score: 35 Expect: 4.8 Matches: 4

Alanine aminotransferase 1 OS=Mus musculus GN=Gpt PE=2 SV=3

**Observed Mr(expt) Mr(calc) ppm Start End Miss Ions Peptide**

912.5618 911.5546 911.5804 -28.32 479 - 485 1 --- R\_VLLEKLR.H+ Acetyl (N-term)  
 1041.6334 1040.6261 1040.6091 16.4 170 - 179 1 23 K.LLVAGEGRAR.T  
 1121.5294 1120.5221 1120.5733 -45.65 339 - 347 1 --- K\_QMAKLMSVR.L+ Acetyl (N-term); Oxidation (M)  
 2773.3573 2772.3501 2772.4116 -22.21 143 - 169 1 --- R.RDGGIPADPNNIFLSTGASDAIVTMLK.L  
**No match to:** 834.3310, 924.5554, 1004.5424, 1012.5287, 1020.5184, 1032.5694, 1065.5734, 1148.6002, 1160.6539, 1203.6746, 1223.6482,  
 1239.6715, 1240.6244, 1255.6655, 1268.6342, 1281.6652, 1292.7494, 1305.6937, 1351.7259, 1368.7634, 1419.7856, 1441.7466, 1556.8021,  
 1561.8613, 1571.8028, 1614.8077, 1633.9167, 1673.8781, 1698.8648, 1740.9933, 1785.9151, 1799.9349, 2081.0386, 2380.2064, 2395.2224,  
 2691.2733, 2749.3154, 2784.3592, 2996.4764

**10. RM47\_MOUSE Mass: 29992 Score: 35 Expect: 5.3 Matches: 7**

39S ribosomal protein L47, mitochondrial OS=Mus musculus GN=Mrp147 PE=2 SV=2

**Observed Mr(expt) Mr(calc) ppm Start End Miss Ions Peptide**

1121.5294 1120.5221 1120.5070 13.4 137 - 146 0 --- K.VVDSMDNVDK.V  
 1203.6746 1202.6673 1202.6554 9.93 2 - 12 1 --- M.AATSLVGICRR.A  
 1268.6342 1267.6270 1267.6343 -5.78 124 - 133 1 --- R\_QRLPMPSPER.L+ Acetyl (N-term); Oxidation (M)  
 1305.6937 1304.6864 1304.6646 16.8 112 - 122 0 --- R.NMLLTLEQEAK.R+ Oxidation (M)  
 1561.8613 1560.8540 1560.7911 40.3 201 - 212 1 --- R.FFAMPYVDRFIR.L  
 1799.9349 1798.9276 1798.9617 -18.96 96 - 109 1 --- K\_SNEDLHKLWYVLLK.E+ Acetyl (N-term)  
 2395.2224 2394.2151 2394.2478 -13.64 44 - 63 1 --- K\_NTPHVTSFLQCKLLHTTISR.K+ Acetyl (N-term)  
**No match to:** 834.3310, 912.5618, 924.5554, 1004.5424, 1012.5287, 1020.5184, 1032.5694, 1041.6334, 1065.5734, 1148.6002, 1160.6539,  
 1223.6482, 1239.6715, 1240.6244, 1255.6655, 1281.6652, 1292.7494, 1351.7259, 1368.7634, 1419.7856, 1441.7466, 1556.8021, 1571.8028,  
 1614.8077, 1633.9167, 1673.8781, 1698.8648, 1740.9933, 1785.9151, 2081.0386, 2380.2064, 2691.2733, 2749.3154, 2773.3573, 2784.3592,  
 2996.4764

**Search Parameters**

**Type of search** : MS/MS Ion Search  
**Enzyme** : Trypsin  
**Fixed modifications** : Carbamidomethyl (C)  
**Variable modifications** : Acetyl (N-term), Oxidation (M)  
**Mass values** : Monoisotopic  
**Protein Mass** : Unrestricted  
**Peptide Mass Tolerance** : ±50 ppm  
**Fragment Mass Tolerance**: ±0.5 Da  
**Max Missed Cleavages** : 1  
**Instrument type** : MALDI-TOF-TOF  
**Query1 (834.3310,1+)** : <no title>  
**Query2 (912.5618,1+)** : <no title>  
**Query3 (924.5554,1+)** : <no title>  
**Query4 (1004.5424,1+)** : <no title>  
**Query5 (1012.5287,1+)** : <no title>  
**Query6 (1020.5184,1+)** : <no title>  
**Query7 (1032.5694,1+)** : <no title>  
**Query8 (1041.6334,1+)** : <no title>

Query9 (1065.5734,1+) : <no title>  
Query10 (1121.5294,1+) : <no title>  
Query11 (1148.6002,1+) : <no title>  
Query12 (1160.6539,1+) : <no title>  
Query13 (1203.6746,1+) : <no title>  
Query14 (1223.6482,1+) : <no title>  
Query15 (1239.6715,1+) : <no title>  
Query16 (1240.6244,1+) : <no title>  
Query17 (1255.6655,1+) : <no title>  
Query18 (1268.6342,1+) : <no title>  
Query19 (1281.6652,1+) : <no title>  
Query20 (1292.7494,1+) : <no title>  
Query21 (1305.6937,1+) : <no title>  
Query22 (1351.7259,1+) : <no title>  
Query23 (1368.7634,1+) : <no title>  
Query24 (1419.7856,1+) : <no title>  
Query25 (1441.7466,1+) : <no title>  
Query26 (1556.8021,1+) : <no title>  
Query27 (1561.8613,1+) : <no title>  
Query28 (1571.8028,1+) : <no title>  
Query29 (1614.8077,1+) : <no title>  
Query30 (1633.9167,1+) : <no title>  
Query31 (1673.8781,1+) : <no title>  
Query32 (1698.8648,1+) : <no title>  
Query33 (1740.9933,1+) : <no title>  
Query34 (1785.9151,1+) : <no title>  
Query35 (1799.9349,1+) : <no title>  
Query36 (2081.0386,1+) : <no title>  
Query37 (2380.2064,1+) : <no title>  
Query38 (2395.2224,1+) : <no title>  
Query39 (2691.2733,1+) : <no title>  
Query40 (2749.3154,1+) : <no title>  
Query41 (2773.3573,1+) : <no title>  
Query42 (2784.3592,1+) : <no title>  
Query43 (2996.4764,1+) : <no title>

**Mascot:** <http://www.matrixscience.com/>

# **MASCOT** Mascot Search Results **SCIENCE**

User :  
Email :  
Search title : Auto submitted by BioTools  
Database : SwissProt 57.15 (515203 sequences; 181334896 residues)  
Taxonomy : Mus. (16281 sequences)  
Timestamp : 20 May 2013 at 01:33:56 GMT  
Warning : A Peptide summary report will usually give a much clearer picture of MS/MS search results.  
Top Score : 58 for FPPS\_MOUSE, Farnesyl pyrophosphate synthase OS=Mus musculus GN=Fdps PE=2 SV=1

## Mascot Score Histogram

Protein score is  $-10 \cdot \log(P)$ , where P is the probability that the observed match is a random event.

Protein scores greater than 55 are significant ( $p < 0.05$ ).

Protein scores are derived from ions scores as a non-probabilistic basis for ranking protein hits.

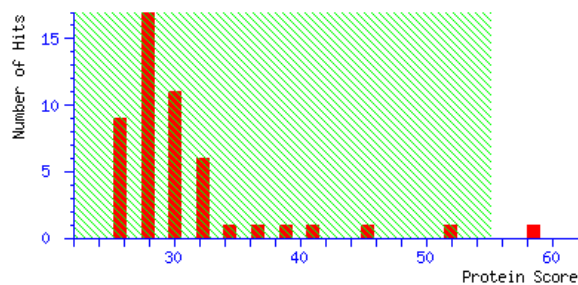

## Protein Summary Report

### Index

| Accession                              | Mass   | Score | Description                                                                                |
|----------------------------------------|--------|-------|--------------------------------------------------------------------------------------------|
| <a href="#">1. <u>FPPS_MOUSE</u></a>   | 40898  | 58    | Farnesyl pyrophosphate synthase OS=Mus musculus GN=Fdps PE=2 SV=1                          |
| <a href="#">2. <u>CSN4_MOUSE</u></a>   | 46541  | 51    | COP9 signalosome complex subunit 4 OS=Mus musculus GN=Cops4 PE=1 SV=1                      |
| <a href="#">3. <u>PUS3_MOUSE</u></a>   | 56138  | 44    | tRNA pseudouridine synthase 3 OS=Mus musculus GN=Pus3 PE=1 SV=2                            |
| <a href="#">4. <u>RT33_MOUSE</u></a>   | 12452  | 42    | 28S ribosomal protein S33, mitochondrial OS=Mus musculus GN=Mtpps33 PE=2 SV=1              |
| <a href="#">5. <u>RAB21_MOUSE</u></a>  | 24490  | 39    | Ras-related protein Rab-21 OS=Mus musculus GN=Rab21 PE=1 SV=4                              |
| <a href="#">6. <u>GRID1_MOUSE</u></a>  | 113142 | 37    | Glutamate receptor delta-1 subunit OS=Mus musculus GN=Grid1 PE=1 SV=1                      |
| <a href="#">7. <u>ELL2_MOUSE</u></a>   | 72681  | 35    | RNA polymerase II elongation factor ELL2 OS=Mus musculus GN=Ell2 PE=2 SV=1                 |
| <a href="#">8. <u>ENC1_MOUSE</u></a>   | 67240  | 33    | Ectoderm-neural cortex protein 1 OS=Mus musculus GN=Enc1 PE=2 SV=1                         |
| <a href="#">9. <u>CKP2L_MOUSE</u></a>  | 83689  | 32    | Cytoskeleton-associated protein 2-like OS=Mus musculus GN=Ckap2l PE=2 SV=1                 |
| <a href="#">10. <u>ZUFSP_MOUSE</u></a> | 66863  | 32    | Zinc finger with UFM1-specific peptidase domain protein OS=Mus musculus GN=Zufsp PE=2 SV=2 |

## Results List



1. FPPS\_MOUSE Mass: 40898 Score: 58 Expect: 0.024 Matches: 6

Famesyl pyrophosphate synthase OS=Mus musculus GN=Fdps PE=2 SV=1

**Observed Mr(expt) Mr(calc) ppm Start End Miss Ions Peptide**

1074.5422 1073.5349 1073.5465 -10.80 76 - 84 1 --- K.KQDAESLQR.A  
1377.7060 1376.6988 1376.7048 -4.40 32 - 44 0 --- K.ELGHPEIGDAIAR.L  
1433.7494 1432.7421 1432.7319 7.12 267 - 277 0 12 K.CSWLVVQCLLR.A  
1948.0534 1947.0461 1947.0425 1.87 27 - 44 1 --- K.VLTEKELGHPEIGDAIAR.L  
2672.2597 2671.2524 2671.2442 3.09 303 - 324 1 --- K.ALYEALDLSAFFKYEEDSYNR.L  
3177.6461 3176.6388 3176.6328 1.89 114 - 141 0 --- R.GQICWYQKPGIGLDINDALLEASIYR.L

**No match to:** 1076.4446, 1130.5526, 1216.6058, 1249.5702, 1359.7067, 1416.7192, 1487.8390, 1489.7779, 1501.7393, 1510.7817, 1515.7510, 1637.8400, 1679.8974, 1701.9053, 1790.8998, 2691.2894, 2748.3168

2. CSN4\_MOUSE Mass: 46541 Score: 51 Expect: 0.13 Matches: 7

COP9 signalosome complex subunit 4 OS=Mus musculus GN=Cops4 PE=1 SV=1

**Observed Mr(expt) Mr(calc) ppm Start End Miss Ions Peptide**

1130.5526 1129.5454 1129.5767 -27.77 108 - 116 0 --- R.QHLASIYEK.E + Acetyl (N-term)  
1377.7060 1376.6988 1376.7300 -22.67 96 - 107 0 --- R.VISFEEQVASIR.Q  
1433.7494 1432.7421 1432.7344 5.41 335 - 347 1 --- K.AEKIASQMITEGR.M  
1515.7510 1514.7437 1514.7147 19.2 7 - 20 0 --- R.QDLAQLMNSSGSHK.D  
1679.8974 1678.8901 1678.9254 -20.99 122 - 137 0 --- R.NAAQVLVGIPILETGQK.Q + Acetyl (N-term)  
1701.9053 1700.8981 1700.8886 5.58 83 - 95 1 --- K.EVYHFTLEKIQR.V + Acetyl (N-term)  
1948.0534 1947.0461 1946.9857 31.1 228 - 244 1 --- K.HALHCTILASAGQQRSR.M + Acetyl (N-term)

**No match to:** 1074.5422, 1076.4446, 1216.6058, 1249.5702, 1359.7067, 1416.7192, 1487.8390, 1489.7779, 1501.7393, 1510.7817, 1637.8400, 1790.8998, 2672.2597, 2691.2894, 2748.3168, 3177.6461

3. PUS3\_MOUSE Mass: 56138 Score: 44 Expect: 0.6 Matches: 7

tRNA pseudouridine synthase 3 OS=Mus musculus GN=Pus3 PE=1 SV=2

**Observed Mr(expt) Mr(calc) ppm Start End Miss Ions Peptide**

1074.5422 1073.5349 1073.5506 -14.58 399 - 408 0 --- K.HTSAFVEGVK.M  
1359.7067 1358.6995 1358.6751 17.9 470 - 481 0 --- R.VCIIDAEINSIA.- + Acetyl (N-term)  
1377.7060 1376.6988 1376.6871 8.48 399 - 410 1 --- K.HTSAFVEGVKMR.T + Oxidation (M)  
1416.7192 1415.7119 1415.7004 8.14 32 - 43 1 --- K.EQANNIKDSSIR.E + Acetyl (N-term)  
1489.7779 1488.7706 1488.7433 18.3 103 - 114 1 --- R.LVESRQTSNYHR.C  
1515.7510 1514.7437 1514.7762 -21.46 469 - 481 1 --- K.RVCIIDAEINSIA.- + Acetyl (N-term)  
2748.3168 2747.3096 2747.2715 13.9 70 - 93 0 --- K.IAYLGWGYQGFASQENTSENTIEEK.L + Acetyl (N-term)

**No match to:** 1076.4446, 1130.5526, 1216.6058, 1249.5702, 1433.7494, 1487.8390, 1501.7393, 1510.7817, 1637.8400, 1679.8974, 1701.9053, 1790.8998, 1948.0534, 2672.2597, 2691.2894, 3177.6461

4. RT33\_MOUSE Mass: 12452 Score: 42 Expect: 1.1 Matches: 4

28S ribosomal protein S33, mitochondrial OS=Mus musculus GN=Mps33 PE=2 SV=1

**Observed Mr(expt) Mr(calc) ppm Start End Miss Ions Peptide**

1359.7067 1358.6995 1358.7446 -33.19 33 - 44 0 --- K.VVSLFSEQPLAK.K + Acetyl (N-term)  
1487.8390 1486.8317 1486.8395 -5.22 33 - 45 1 --- K.VVSLFSEQPLAKK.K + Acetyl (N-term)

1679.8974 1678.8901 1678.8964 -3.72 30 - 44 1 --- K.SMKVVSLFSEQPLAK.K + Oxidation (M)  
 2691.2894 2690.2821 2690.2223 22.2 46 - 66 1 --- K.KETYDWPYHNHTYFALMGNLR.F + Acetyl (N-term); Oxidation (M)  
**No match to:** 1074.5422, 1076.4446, 1130.5526, 1216.6058, 1249.5702, 1377.7060, 1416.7192, 1433.7494, 1489.7779, 1501.7393, 1510.7817, 1515.7510, 1637.8400, 1701.9053, 1790.8998, 1948.0534, 2672.2597, 2748.3168, 3177.6461

5. RAB21\_MOUSE Mass: 24490 Score: 39 Expect: 2.2 Matches: 5

Ras-related protein Rab-21 OS=Mus musculus GN=Rab21 PE=1 SV=4

**Observed Mr(expt) Mr(calc) ppm Start End Miss Ions Peptide**

1216.6058 1215.5985 1215.5956 2.42 188 - 200 1 --- R<sub>2</sub>AKNGSSQAGAAR.R + Acetyl (N-term)  
 1249.5702 1248.5629 1248.5656 -2.14 178 - 187 0 --- R<sub>2</sub>MIETAQVDER.A + Acetyl (N-term); Oxidation (M)  
 1359.7067 1358.6995 1358.7558 -41.46 46 - 57 0 --- K.HITTLQASFLTK.K  
 1487.8390 1486.8317 1486.8508 -12.78 46 - 58 1 --- K.HITTLQASFLTKK.L  
 1790.8998 1789.8926 1789.8889 2.07 117 - 131 1 --- R<sub>2</sub>KMLGNEICLCIVGNK.I + Acetyl (N-term)

**No match to:** 1074.5422, 1076.4446, 1130.5526, 1377.7060, 1416.7192, 1433.7494, 1489.7779, 1501.7393, 1510.7817, 1515.7510, 1637.8400, 1679.8974, 1701.9053, 1948.0534, 2672.2597, 2691.2894, 2748.3168, 3177.6461

6. GRID1\_MOUSE Mass: 113142 Score: 37 Expect: 3.3 Matches: 8

Glutamate receptor delta-1 subunit OS=Mus musculus GN=Grid1 PE=1 SV=1

**Observed Mr(expt) Mr(calc) ppm Start End Miss Ions Peptide**

1130.5526 1129.5454 1129.5992 -47.69 354 - 363 1 --- R.KSTKPWNGGR.S  
 1359.7067 1358.6995 1358.6792 14.9 536 - 546 0 --- R<sub>2</sub>YMDYSVGILIK.K + Acetyl (N-term); Oxidation (M)  
 1416.7192 1415.7119 1415.6438 48.1 343 - 353 0 --- K<sub>2</sub>WHSMASLNCIR.K + Acetyl (N-term)  
 1433.7494 1432.7421 1432.7133 20.1 372 - 384 0 --- K.GHITGLTGVMEFR.E + Oxidation (M)  
 1501.7393 1500.7321 1500.7467 -9.74 420 - 433 0 --- K.GLNGSLQERPMGSR.L  
 1515.7510 1514.7437 1514.7803 -24.12 535 - 546 1 --- K<sub>2</sub>RYMDYSVGILIK.K + Acetyl (N-term); Oxidation (M)  
 1790.8998 1789.8926 1789.9145 -12.25 355 - 370 1 --- K.STKPWNGGRSMLDTIK.K  
 2748.3168 2747.3096 2747.3840 -27.12 983 - 1009 0 --- K.TPIPMSPQVPPGGVLPEALDTSHGTSI.-

**No match to:** 1074.5422, 1076.4446, 1216.6058, 1249.5702, 1377.7060, 1487.8390, 1489.7779, 1510.7817, 1637.8400, 1679.8974, 1701.9053, 1948.0534, 2672.2597, 2691.2894, 3177.6461

7. ELL2\_MOUSE Mass: 72681 Score: 35 Expect: 4.9 Matches: 5

RNA polymerase II elongation factor ELL2 OS=Mus musculus GN=Ell2 PE=2 SV=1

**Observed Mr(expt) Mr(calc) ppm Start End Miss Ions Peptide**

1074.5422 1073.5349 1073.5717 -34.24 281 - 289 0 --- R.QTLDLELSR.K  
 1216.6058 1215.5985 1215.5844 11.7 291 - 301 0 --- K<sub>2</sub>LNPSQNASTR.S + Acetyl (N-term)  
 1416.7192 1415.7119 1415.6939 12.7 1 - 14 1 14 -.MAAGGAAGLREEQR.Y  
 1501.7393 1500.7321 1500.7208 7.49 599 - 610 1 --- K<sub>2</sub>IKQSSPNYHEEK.Y + Acetyl (N-term)  
 1679.8974 1678.8901 1678.9366 -27.67 239 - 254 0 --- K.NSLGAILQQVANLNPK.D

**No match to:** 1076.4446, 1130.5526, 1249.5702, 1359.7067, 1377.7060, 1433.7494, 1487.8390, 1489.7779, 1510.7817, 1515.7510, 1637.8400, 1701.9053, 1790.8998, 1948.0534, 2672.2597, 2691.2894, 2748.3168, 3177.6461

8. ENC1\_MOUSE Mass: 67240 Score: 33 Expect: 7.6 Matches: 6

Ectoderm-neural cortex protein 1 OS=Mus musculus GN=Enc1 PE=2 SV=1

**Observed Mr(expt) Mr(calc) ppm Start End Miss Ions Peptide**

1074.5422 1073.5349 1073.4924 39.6 1 - 9 0 -- -.MSVSVHENR.K + Oxidation (M)  
1249.5702 1248.5629 1248.5849 -17.59 70 - 80 0 -- R.YFEAMFSGGLK.E  
1377.7060 1376.6988 1376.7663 -49.08 319 - 330 1 -- K.EIIPKADIPSPR.K + Acetyl (N-term)  
1679.8974 1678.8901 1678.8791 6.59 11 - 25 1 -- K.SRASSGSINIYLFHK.S  
1701.9053 1700.8981 1700.8709 16.0 540 - 553 1 -- K.LYVVGGYFGIQRCK.T + Acetyl (N-term)  
2748.3168 2747.3096 2747.3323 -8.29 110 - 133 0 -- R.VIINEENAESLLEAGDMLEFQDIR.D

**No match to:** 1076.4446, 1130.5526, 1216.6058, 1359.7067, 1416.7192, 1433.7494, 1487.8390, 1489.7779, 1501.7393, 1510.7817, 1515.7510, 1637.8400, 1790.8998, 1948.0534, 2672.2597, 2691.2894, 3177.6461

**9. CKP2L\_MOUSE Mass: 83689 Score: 32 Expect: 9.4 Matches: 7**

Cytoskeleton-associated protein 2-like OS=Mus musculus GN=Ckap2l PE=2 SV=1

**Observed Mr(expt) Mr(calc) ppm Start End Miss Ions Peptide**

1130.5526 1129.5454 1129.5437 1.43 138 - 146 0 -- R.QCPDIQELK.T  
1249.5702 1248.5629 1248.6020 -31.29 523 - 532 0 -- K.IDSTLTECLR.L + Acetyl (N-term)  
1359.7067 1358.6995 1358.6864 9.62 138 - 148 1 -- R.QCPDIQELKTK.Q  
1377.7060 1376.6988 1376.6969 1.31 522 - 532 1 -- K.KIDSTLTECLR.L + Acetyl (N-term)  
1416.7192 1415.7119 1415.7270 -10.61 446 - 459 1 -- R.KGAPSATQTHPHGK.K  
1501.7393 1500.7321 1500.6878 29.5 1 - 15 0 -- \_MVGPPTASAAAEER.W + Acetyl (N-term); Oxidation (M)  
1637.8400 1636.8327 1636.8757 -26.27 255 - 268 0 -- K.SRPRPTVADSTRPR.E + Acetyl (N-term)

**No match to:** 1074.5422, 1076.4446, 1216.6058, 1433.7494, 1487.8390, 1489.7779, 1510.7817, 1515.7510, 1679.8974, 1701.9053, 1790.8998, 1948.0534, 2672.2597, 2691.2894, 2748.3168, 3177.6461

**10. ZUFSP\_MOUSE Mass: 66863 Score: 32 Expect: 10 Matches: 4**

Zinc finger with UFM1-specific peptidase domain protein OS=Mus musculus GN=Zufsp PE=2 SV=2

**Observed Mr(expt) Mr(calc) ppm Start End Miss Ions Peptide**

1130.5526 1129.5454 1129.5702 -22.02 439 - 446 1 -- K.CRIIDFHK.S + Acetyl (N-term)  
1216.6058 1215.5985 1215.5996 -0.91 65 - 75 0 -- K.LAAVQYGHSDR.K  
1433.7494 1432.7421 1432.7092 23.0 525 - 536 1 16 K.QDMEASSLRQLR.K  
1790.8998 1789.8926 1789.8339 32.8 161 - 175 1 -- K.IEGCSQDMEIHVKTK.H + Oxidation (M)

**No match to:** 1074.5422, 1076.4446, 1249.5702, 1359.7067, 1377.7060, 1416.7192, 1487.8390, 1489.7779, 1501.7393, 1510.7817, 1515.7510, 1637.8400, 1679.8974, 1701.9053, 1948.0534, 2672.2597, 2691.2894, 2748.3168, 3177.6461

**Search Parameters**

**Type of search** : MS/MS Ion Search  
**Enzyme** : Trypsin  
**Fixed modifications** : Carbamidomethyl (C)  
**Variable modifications** : Acetyl (N-term), Oxidation (M)  
**Mass values** : Monoisotopic  
**Protein Mass** : Unrestricted  
**Peptide Mass Tolerance** :  $\pm 50$  ppm  
**Fragment Mass Tolerance** :  $\pm 0.5$  Da  
**Max Missed Cleavages** : 1

**Instrument type** : MALDI-TOF-TOF

**Query1 (1074.5422,1+)** : <no title>

**Query2 (1076.4446,1+)** : <no title>

**Query3 (1130.5526,1+)** : <no title>

**Query4 (1216.6058,1+)** : <no title>

**Query5 (1249.5702,1+)** : <no title>

**Query6 (1359.7067,1+)** : <no title>

**Query7 (1377.7060,1+)** : <no title>

**Query8 (1416.7192,1+)** : <no title>

**Query9 (1433.7494,1+)** : <no title>

**Query10 (1487.8390,1+)** : <no title>

**Query11 (1489.7779,1+)** : <no title>

**Query12 (1501.7393,1+)** : <no title>

**Query13 (1510.7817,1+)** : <no title>

**Query14 (1515.7510,1+)** : <no title>

**Query15 (1637.8400,1+)** : <no title>

**Query16 (1679.8974,1+)** : <no title>

**Query17 (1701.9053,1+)** : <no title>

**Query18 (1790.8998,1+)** : <no title>

**Query19 (1948.0534,1+)** : <no title>

**Query20 (2672.2597,1+)** : <no title>

**Query21 (2691.2894,1+)** : <no title>

**Query22 (2748.3168,1+)** : <no title>

**Query23 (3177.6461,1+)** : <no title>

**Mascot:** <http://www.matrixscience.com/>

# **MASCOT** Mascot Search Results **SCIENCE**

User :  
Email :  
Search title : Auto submitted by BioTools  
Database : IPI\_mouse (59534 sequences; 26627161 residues)  
Timestamp : 20 May 2013 at 02:36:18 GMT  
Warning : A Peptide summary report will usually give a much clearer picture of MS/MS search results.  
Top Score : 128 for IPI00828912, Tax\_Id=10090 Gene\_Symbol=1810030J14Rik mucosal pentraxin precursor

## Mascot Score Histogram

Protein score is  $-10 \cdot \log(P)$ , where P is the probability that the observed match is a random event.

Protein scores greater than 60 are significant ( $p < 0.05$ ).

Protein scores are derived from ions scores as a non-probabilistic basis for ranking protein hits.

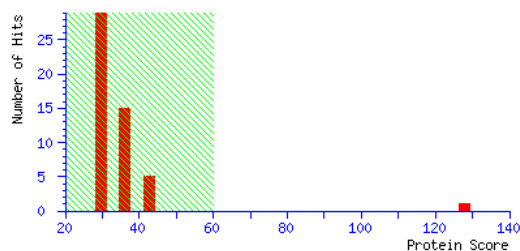

## Protein Summary Report

### Index

| Accession                       | Mass  | Score | Description                                                                             |
|---------------------------------|-------|-------|-----------------------------------------------------------------------------------------|
| 1. <a href="#">IPI00828912</a>  | 24679 | 128   | Tax_Id=10090 Gene_Symbol=1810030J14Rik mucosal pentraxin precursor                      |
| 2. <a href="#">IPI00918331</a>  | 68855 | 44    | Tax_Id=10090 Gene_Symbol=Brwd1 Uncharacterized protein                                  |
| 3. <a href="#">IPI00886417</a>  | 46246 | 44    | Tax_Id=10090 Gene_Symbol=Brwd1 Uncharacterized protein                                  |
| 4. <a href="#">IPI00987122</a>  | 20749 | 42    | Tax_Id=10090 Gene_Symbol=Gm6744 uncharacterized protein C3orf24 homolog                 |
| 5. <a href="#">IPI00989199</a>  | 20849 | 41    | Tax_Id=10090 Gene_Symbol=Gm6744 uncharacterized protein C3orf24 homolog                 |
| 6. <a href="#">IPI00885883</a>  | 20677 | 40    | Tax_Id=10090 Gene_Symbol=Dohh Uncharacterized protein                                   |
| 7. <a href="#">IPI00380894</a>  | 59017 | 37    | Tax_Id=10090 Gene_Symbol=Shisa6 Protein shisa-6 homolog                                 |
| 8. <a href="#">IPI00970738</a>  | 27889 | 37    | Tax_Id=10090 Gene_Symbol=Ccdc127 Uncharacterized protein                                |
| 9. <a href="#">IPI00131843</a>  | 30661 | 36    | Tax_Id=10090 Gene_Symbol=Ccdc127 Isoform 1 of Coiled-coil domain-containing protein 127 |
| 10. <a href="#">IPI00112297</a> | 27692 | 36    | Tax_Id=10090 Gene_Symbol=Ces7 Uncharacterized protein                                   |

### Results List

1. [IPI00828912](#) Mass: 24679 Score: 128 Expect: 9.4e-009 Matches: 4  
Tax\_Id=10090 Gene\_Symbol=1810030J14Rik mucosal pentraxin precursor

**Observed Mr(expt) Mr(calc) ppm Start End Miss Ions Peptide**

1051.5584 1050.5511 1050.5458 5.06 103 - 112 0 25 K.APTNLPDPAR.I  
2082.0179 2081.0106 2081.0218 -5.37 58 - 74 0 30 K.TFTDLTRPYSIFSYNTR.N  
2483.2254 2482.2181 2482.2533 -14.18 167 - 187 0 --- K.QSFVGEIWDVSLWDHVPLEK.V  
2590.2700 2589.2627 2589.2798 -6.61 113 - 135 0 33 R.ICVNWESGSGIAEFWLNKPLGR.K

**No match to:** 987.5062, 1113.5603, 1558.8171, 1927.0615, 1999.0384, 2020.0256, 2036.0083, 2045.0380, 2067.3556, 2505.2273, 2572.2604, 2605.2673, 2691.2646, 2748.2878

**2. IPI00918331 Mass: 68855 Score: 44 Expect: 2.4 Matches: 6**

Tax\_Id=10090 Gene\_Symbol=Brwd1 Uncharacterized protein

**Observed Mr(expt) Mr(calc) ppm Start End Miss Ions Peptide**

987.5062 986.4989 986.5257 -27.20 433 - 441 1 --- R.RSQVEGVR.Q  
2020.0256 2019.0183 2019.0135 2.36 206 - 223 0 1 R.IMLSAGHDGSIFIWDITK.G + Oxidation (M)  
2036.0083 2035.0010 2035.0197 -9.15 120 - 135 1 --- R.FEQLEWRSILLDMSAR.I + Acetyl (N-term)  
2483.2254 2482.2181 2482.1726 18.3 73 - 93 1 --- R.MYFLGFDAPEKIAELESHTDK.V + Acetyl (N-term)  
2572.2604 2571.2531 2571.2639 -4.22 152 - 174 0 --- K.VTMIAWNQDDSTVVAVNDHVLK.V + Oxidation (M)  
2590.2700 2589.2627 2589.1765 33.3 84 - 105 1 --- K.IAELESHTDKVDSIQFCNNGDR.F + Acetyl (N-term)

**No match to:** 1051.5584, 1113.5603, 1558.8171, 1927.0615, 1999.0384, 2045.0380, 2067.3556, 2082.0179, 2505.2273, 2605.2673, 2691.2646, 2748.2878

**3. IPI00886417 Mass: 46246 Score: 44 Expect: 2.6 Matches: 5**

Tax\_Id=10090 Gene\_Symbol=Brwd1 Uncharacterized protein

**Observed Mr(expt) Mr(calc) ppm Start End Miss Ions Peptide**

2020.0256 2019.0183 2019.0135 2.36 195 - 212 0 1 R.IMLSAGHDGSIFIWDITK.G + Oxidation (M)  
2036.0083 2035.0010 2035.0197 -9.15 109 - 124 1 --- R.FEQLEWRSILLDMSAR.I + Acetyl (N-term)  
2483.2254 2482.2181 2482.1726 18.3 62 - 82 1 --- R.MYFLGFDAPEKIAELESHTDK.V + Acetyl (N-term)  
2572.2604 2571.2531 2571.2639 -4.22 141 - 163 0 --- K.VTMIAWNQDDSTVVAVNDHVLK.V + Oxidation (M)  
2590.2700 2589.2627 2589.1765 33.3 73 - 94 1 --- K.IAELESHTDKVDSIQFCNNGDR.F + Acetyl (N-term)

**No match to:** 987.5062, 1051.5584, 1113.5603, 1558.8171, 1927.0615, 1999.0384, 2045.0380, 2067.3556, 2082.0179, 2505.2273, 2605.2673, 2691.2646, 2748.2878

**4. IPI00987122 Mass: 20749 Score: 42 Expect: 3.8 Matches: 4**

Tax\_Id=10090 Gene\_Symbol=Gm6744 uncharacterized protein C3orf24 homolog

**Observed Mr(expt) Mr(calc) ppm Start End Miss Ions Peptide**

2020.0256 2019.0183 2018.9983 9.93 64 - 81 1 --- R.MEAVKGSELGYPQPQK.G + Acetyl (N-term); Oxidation (M)  
2505.2273 2504.2200 2504.2610 -16.34 22 - 41 1 --- R.HITPIFPPRHPFVLPFCFPR.S + Acetyl (N-term); Oxidation (M)  
2590.2700 2589.2627 2589.2474 5.90 1 - 21 0 --- -.MAGYQLWSPWNPLDESLQWLR.H  
2605.2673 2604.2600 2604.2854 -9.74 42 - 63 1 --- R.SSSDLEVQQCFREVAVILETPR.M + Acetyl (N-term)

**No match to:** 987.5062, 1051.5584, 1113.5603, 1558.8171, 1927.0615, 1999.0384, 2036.0083, 2045.0380, 2067.3556, 2082.0179, 2483.2254, 2572.2604, 2691.2646, 2748.2878

**5. IPI00989199 Mass: 20849 Score: 41 Expect: 5.1 Matches: 4**

Tax\_Id=10090 Gene\_Symbol=Gm6744 uncharacterized protein C3orf24 homolog

| Observed  | Mr(expt)  | Mr(calc)  | ppm    | Start | End | Miss | Ions | Peptide                                                   |
|-----------|-----------|-----------|--------|-------|-----|------|------|-----------------------------------------------------------|
| 2020.0256 | 2019.0183 | 2018.9983 | 9.93   | 64    | 81  | 1    | --   | R_MEAVKGSSELSGYLPQPQK.G + Acetyl (N-term); Oxidation (M)  |
| 2505.2273 | 2504.2200 | 2504.2610 | -16.34 | 22    | 41  | 1    | --   | R_HITPIFPRHPFVLPVPCFPR.S + Acetyl (N-term); Oxidation (M) |
| 2590.2700 | 2589.2627 | 2589.2474 | 5.90   | 1     | 21  | 0    | --   | -.MAGYQLWSPWNPLDESLQWLR.H                                 |
| 2605.2673 | 2604.2600 | 2604.2854 | -9.74  | 42    | 63  | 1    | --   | R_SSSDLEVQQCFREVAVILETPR.M + Acetyl (N-term)              |

**No match to:** 987.5062, 1051.5584, 1113.5603, 1558.8171, 1927.0615, 1999.0384, 2036.0083, 2045.0380, 2067.3556, 2082.0179, 2483.2254, 2572.2604, 2691.2646, 2748.2878

**6. [IPI00885883](#) Mass: 20677 Score: 40 Expect: 6.5 Matches: 4**

Tax\_Id=10090 Gene\_Symbol=Dohh Uncharacterized protein

| Observed  | Mr(expt)  | Mr(calc)  | ppm    | Start | End | Miss | Ions | Peptide                                                    |
|-----------|-----------|-----------|--------|-------|-----|------|------|------------------------------------------------------------|
| 1051.5584 | 1050.5511 | 1050.5280 | 21.9   | 179   | 188 | 1    | --   | R_AMFALRNVGG.- + Oxidation (M)                             |
| 1558.8171 | 1557.8099 | 1557.8151 | -3.35  | 164   | 176 | 0    | --   | R_EALLDEARPLFER.Y                                          |
| 2082.0179 | 2081.0106 | 2081.0827 | -34.63 | 70    | 88  | 0    | --   | R_AIPVLADVLQDTSQEPMVR.H                                    |
| 2483.2254 | 2482.2181 | 2482.1620 | 22.6   | 46    | 66  | 1    | --   | R_GFEDSSALLKHELAYCLGQMR.D + Acetyl (N-term); Oxidation (M) |

**No match to:** 987.5062, 1113.5603, 1927.0615, 1999.0384, 2020.0256, 2036.0083, 2045.0380, 2067.3556, 2505.2273, 2572.2604, 2590.2700, 2605.2673, 2691.2646, 2748.2878

**7. [IPI00380894](#) Mass: 59017 Score: 37 Expect: 12 Matches: 5**

Tax\_Id=10090 Gene\_Symbol=Shisa6 Protein shisa-6 homolog

| Observed  | Mr(expt)  | Mr(calc)  | ppm    | Start | End | Miss | Ions | Peptide                                        |
|-----------|-----------|-----------|--------|-------|-----|------|------|------------------------------------------------|
| 1113.5603 | 1112.5530 | 1112.6050 | -46.75 | 39    | 49  | 1    | --   | R_TLNAGAVGGRR.A + Acetyl (N-term)              |
| 1558.8171 | 1557.8099 | 1557.7675 | 27.2   | 164   | 177 | 1    | --   | K_VVSPGPENKYDPEK.D                             |
| 2590.2700 | 2589.2627 | 2589.2857 | -8.87  | 227   | 249 | 1    | --   | R_QQGPIPIAH CERETISAIDTSPK.E + Acetyl (N-term) |
| 2691.2646 | 2690.2573 | 2690.2772 | -7.39  | 499   | 520 | 1    | --   | R_RHNTVEQLHYIPGHHTCYTASKT + Acetyl (N-term)    |
| 2748.2878 | 2747.2806 | 2747.2755 | 1.83   | 466   | 491 | 1    | --   | R_MTKMHSHPSASNNSYATLGQSQAAR                    |

**No match to:** 987.5062, 1051.5584, 1927.0615, 1999.0384, 2020.0256, 2036.0083, 2045.0380, 2067.3556, 2082.0179, 2483.2254, 2505.2273, 2572.2604, 2605.2673

**8. [IPI00970738](#) Mass: 27889 Score: 37 Expect: 13 Matches: 4**

Tax\_Id=10090 Gene\_Symbol=Ccdc127 Uncharacterized protein

| Observed  | Mr(expt)  | Mr(calc)  | ppm    | Start | End | Miss | Ions | Peptide                                       |
|-----------|-----------|-----------|--------|-------|-----|------|------|-----------------------------------------------|
| 987.5062  | 986.4989  | 986.5396  | -41.26 | 181   | 188 | 1    | --   | R_SARLELEK.S + Acetyl (N-term)                |
| 2036.0083 | 2035.0010 | 2034.9806 | 10.1   | 1     | 17  | 0    | --   | -.MNNLNDPPNWNIRPNAR.A                         |
| 2572.2604 | 2571.2531 | 2571.2527 | 0.17   | 194   | 217 | 1    | --   | R_TSVDPVAADLEMAAGLSDFKHDK.H + Acetyl (N-term) |
| 2605.2673 | 2604.2600 | 2604.3827 | -47.13 | 26    | 46  | 1    | --   | K_WNYALLVPMLGLAAFRWIWSR.E + Acetyl (N-term)   |

**No match to:** 1051.5584, 1113.5603, 1558.8171, 1927.0615, 1999.0384, 2020.0256, 2045.0380, 2067.3556, 2082.0179, 2483.2254, 2505.2273, 2590.2700, 2691.2646, 2748.2878

**9. [IPI00131843](#) Mass: 30661 Score: 36 Expect: 16 Matches: 4**

Tax\_Id=10090 Gene\_Symbol=Ccdc127 Isoform 1 of Coiled-coil domain-containing protein 127

| Observed  | Mr(expt)  | Mr(calc)  | ppm    | Start | End | Miss | Ions | Peptide                                       |
|-----------|-----------|-----------|--------|-------|-----|------|------|-----------------------------------------------|
| 987.5062  | 986.4989  | 986.5396  | -41.26 | 181   | 188 | 1    | --   | R_SARLELEK.S + Acetyl (N-term)                |
| 2036.0083 | 2035.0010 | 2034.9806 | 10.1   | 1     | 17  | 0    | --   | -.MNNLNDPPNWNIRPNAR.A                         |
| 2572.2604 | 2571.2531 | 2571.2527 | 0.17   | 194   | 217 | 1    | --   | R_TSVDPVAADLEMAAGLSDFKHDK.H + Acetyl (N-term) |

2605.2673 2604.2600 2604.3827 -47.13 26 - 46 1 --- K.WNYALLVPMLGLAAFRWIWSR.E + Acetyl (N-term)

**No match to:** 1051.5584, 1113.5603, 1558.8171, 1927.0615, 1999.0384, 2020.0256, 2045.0380, 2067.3556, 2082.0179, 2483.2254, 2505.2273, 2590.2700, 2691.2646, 2748.2878

**10. IPI00112297 Mass: 27692 Score: 36 Expect: 17 Matches: 3**

Tax\_Id=10090 Gene\_Symbol=Ces7 Uncharacterized protein

**Observed Mr(expt) Mr(calc) ppm Start End Miss Ions Peptide**

2082.0179 2081.0106 2080.9987 5.75 138 - 155 1 --- K.GDVVMFEEATEEEKLLSR.K

2590.2700 2589.2627 2589.2681 -2.10 1 - 22 0 8 -.MSSMVLFI~~S~~ITCLYVFSSFSVR.T + Oxidation (M)

2605.2673 2604.2600 2604.2458 5.45 129 - 151 1 --- R.FVFGGPFLKGDVVMFEEATEEEK.L

**No match to:** 987.5062, 1051.5584, 1113.5603, 1558.8171, 1927.0615, 1999.0384, 2020.0256, 2036.0083, 2045.0380, 2067.3556, 2483.2254, 2505.2273, 2572.2604, 2691.2646, 2748.2878

**Search Parameters**

**Type of search** : MS/MS Ion Search

**Enzyme** : Trypsin

**Fixed modifications** : Carbamidomethyl (C)

**Variable modifications** : Acetyl (N-term),Oxidation (M)

**Mass values** : Monoisotopic

**Protein Mass** : Unrestricted

**Peptide Mass Tolerance** :  $\pm 50$  ppm

**Fragment Mass Tolerance**:  $\pm 0.5$  Da

**Max Missed Cleavages** : 1

**Instrument type** : MALDI-TOF-TOF

**Query1 (987.5062,1+)** : <no title>

**Query2 (1051.5584,1+)** : <no title>

**Query3 (1113.5603,1+)** : <no title>

**Query4 (1558.8171,1+)** : <no title>

**Query5 (1927.0615,1+)** : <no title>

**Query6 (1999.0384,1+)** : <no title>

**Query7 (2020.0256,1+)** : <no title>

**Query8 (2036.0083,1+)** : <no title>

**Query9 (2045.0380,1+)** : <no title>

**Query10 (2067.3556,1+)** : <no title>

**Query11 (2082.0179,1+)** : <no title>

**Query12 (2483.2254,1+)** : <no title>

**Query13 (2505.2273,1+)** : <no title>

**Query14 (2572.2604,1+)** : <no title>

**Query15 (2590.2700,1+)** : <no title>

**Query16 (2605.2673,1+)** : <no title>

**Query17 (2691.2646,1+)** : <no title>

**Query18 (2748.2878,1+)** : <no title>



**Mascot:** <http://www.matrixscience.com/>

# **MASCOT** Mascot Search Results **SCIENCE**

User :  
Email :  
Search title : Auto submitted by BioTools  
Database : IPI\_mouse (59534 sequences; 26627161 residues)  
Timestamp : 20 May 2013 at 02:36:23 GMT  
Warning : A Peptide summary report will usually give a much clearer picture of MS/MS search results.  
Top Score : 109 for IPI00828912, Tax\_Id=10090 Gene\_Symbol=1810030J14Rik mucosal pentraxin precursor

## Mascot Score Histogram

Protein score is  $-10 \cdot \log(P)$ , where P is the probability that the observed match is a random event.

Protein scores greater than 60 are significant ( $p < 0.05$ ).

Protein scores are derived from ions scores as a non-probabilistic basis for ranking protein hits.

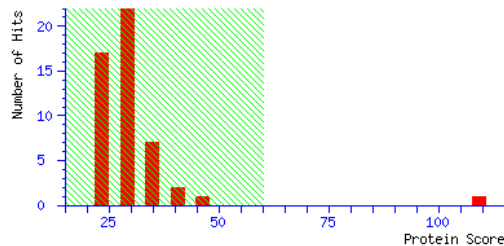

## Protein Summary Report

### Index

| Accession                       | Mass   | Score | Description                                                                                   |
|---------------------------------|--------|-------|-----------------------------------------------------------------------------------------------|
| 1. <a href="#">IPI00828912</a>  | 24679  | 109   | Tax_Id=10090 Gene_Symbol=1810030J14Rik mucosal pentraxin precursor                            |
| 2. <a href="#">IPI00970738</a>  | 27889  | 44    | Tax_Id=10090 Gene_Symbol=Ccdc127 Uncharacterized protein                                      |
| 3. <a href="#">IPI00131843</a>  | 30661  | 43    | Tax_Id=10090 Gene_Symbol=Ccdc127 Isoform 1 of Coiled-coil domain-containing protein 127       |
| 4. <a href="#">IPI00136152</a>  | 12409  | 40    | Tax_Id=10090 Gene_Symbol=5430411C19Rik Putative uncharacterized protein                       |
| 5. <a href="#">IPI00515393</a>  | 71996  | 37    | Tax_Id=10090 Gene_Symbol=Rpa1 replication protein A 70 kDa DNA-binding subunit isoform 1      |
| 6. <a href="#">IPI00975060</a>  | 128420 | 37    | Tax_Id=10090 Gene_Symbol=Kif1a Uncharacterized protein (Fragment)                             |
| 7. <a href="#">IPI00895307</a>  | 76327  | 36    | Tax_Id=10090 Gene_Symbol=Ccdc30 Isoform 2 of Coiled-coil domain-containing protein 30         |
| 8. <a href="#">IPI00224237</a>  | 105043 | 35    | Tax_Id=10090 Gene_Symbol=Tmtc3 Isoform 1 of Transmembrane and TPR repeat-containing protein 3 |
| 9. <a href="#">IPI00649923</a>  | 14695  | 34    | Tax_Id=10090 Gene_Symbol=Tgtp2;Tgtp1 Uncharacterized protein                                  |
| 10. <a href="#">IPI01027494</a> | 14245  | 33    | Tax_Id=10090 Gene_Symbol=Wdfy3 Protein                                                        |

### Results List

1. [IPI00828912](#) Mass: 24679 Score: 109 Expect: 7.5e-007 Matches: 2  
Tax\_Id=10090 Gene\_Symbol=1810030J14Rik mucosal pentraxin precursor

**Observed Mr(expt) Mr(calc) ppm Start End Miss Ions Peptide**

2082.0797 2081.0725 2081.0218 24.3 58 - 74 0 57 K.TFTDLTRPYSIFSYNTR.N

2590.3160 2589.3087 2589.2798 11.2 113 - 135 0 32 R.ICVNWESGSGIAEFWLNKPLGR.K

**No match to:** 987.5855, 1113.1180, 1113.6457, 1247.6863, 2020.0703, 2036.0456, 2045.8648, 2067.3899, 2505.2555, 2572.2969, 2592.2864

**2. IPI00970738 Mass: 27889 Score: 44 Expect: 2.2 Matches: 4**

Tax\_Id=10090 Gene\_Symbol=Ccdc127 Uncharacterized protein

**Observed Mr(expt) Mr(calc) ppm Start End Miss Ions Peptide**

987.5855 986.5783 986.5396 39.2 181 - 188 1 --- R<sub>2</sub>SARLELEK.S + Acetyl (N-term)

2036.0456 2035.0383 2034.9806 28.4 1 - 17 0 --- -.MNNLNDPPNWNIRPNAR.A

2572.2969 2571.2896 2571.2527 14.4 194 - 217 1 --- R<sub>2</sub>TSVDPVAADLEMAAGLSDFKHDK.H + Acetyl (N-term)

2592.2864 2591.2791 2591.2225 21.9 2 - 25 1 --- M.NNLNDPPNWNIRPNARADGGDGSK.W

**No match to:** 1113.1180, 1113.6457, 1247.6863, 2020.0703, 2045.8648, 2067.3899, 2082.0797, 2505.2555, 2590.3160

**3. IPI00131843 Mass: 30661 Score: 43 Expect: 3.1 Matches: 4**

Tax\_Id=10090 Gene\_Symbol=Ccdc127 Isoform 1 of Coiled-coil domain-containing protein 127

**Observed Mr(expt) Mr(calc) ppm Start End Miss Ions Peptide**

987.5855 986.5783 986.5396 39.2 181 - 188 1 --- R<sub>2</sub>SARLELEK.S + Acetyl (N-term)

2036.0456 2035.0383 2034.9806 28.4 1 - 17 0 --- -.MNNLNDPPNWNIRPNAR.A

2572.2969 2571.2896 2571.2527 14.4 194 - 217 1 --- R<sub>2</sub>TSVDPVAADLEMAAGLSDFKHDK.H + Acetyl (N-term)

2592.2864 2591.2791 2591.2225 21.9 2 - 25 1 --- M.NNLNDPPNWNIRPNARADGGDGSK.W

**No match to:** 1113.1180, 1113.6457, 1247.6863, 2020.0703, 2045.8648, 2067.3899, 2082.0797, 2505.2555, 2590.3160

**4. IPI00136152 Mass: 12409 Score: 40 Expect: 6.4 Matches: 3**

Tax\_Id=10090 Gene\_Symbol=5430411C19Rik Putative uncharacterized protein

**Observed Mr(expt) Mr(calc) ppm Start End Miss Ions Peptide**

2020.0703 2019.0630 2018.9765 42.9 1 - 19 0 --- -.MSQPDALCSQSTAQALLAK.N

2036.0456 2035.0383 2035.0633 -12.28 49 - 65 1 --- K.SHRACEEILPSQQLVLR.L

2082.0797 2081.0725 2080.9881 40.5 20 - 38 1 --- K.NASVSSVLAMRSCDLSEQK.F

**No match to:** 987.5855, 1113.1180, 1113.6457, 1247.6863, 2045.8648, 2067.3899, 2505.2555, 2572.2969, 2590.3160, 2592.2864

**5. IPI00515393 Mass: 71996 Score: 37 Expect: 11 Matches: 5**

Tax\_Id=10090 Gene\_Symbol=Rpa1 replication protein A 70 kDa DNA-binding subunit isoform 1

**Observed Mr(expt) Mr(calc) ppm Start End Miss Ions Peptide**

987.5855 986.5783 986.5509 27.8 233 - 240 1 --- R<sub>2</sub>VTNKSQIR.T + Acetyl (N-term)

1247.6863 1246.6790 1246.6306 38.9 520 - 529 0 --- K.VIDQQNGLYR.C + Acetyl (N-term)

2020.0703 2019.0630 2019.0160 23.3 247 - 264 1 --- R<sub>2</sub>GEGKLSLELVDESGEIR.A + Acetyl (N-term)

2082.0797 2081.0725 2081.0476 11.9 92 - 109 1 --- R.MQPKPHGNPYGEQSVLRK.L + Oxidation (M)

2505.2555 2504.2482 2504.3023 -21.61 188 - 213 0 --- K.AYGASKPFGKPA GTGLLQPSGGTQSK.V

**No match to:** 1113.1180, 1113.6457, 2036.0456, 2045.8648, 2067.3899, 2572.2969, 2590.3160, 2592.2864

**6. IPI00975060 Mass: 128420 Score: 37 Expect: 11 Matches: 7**

Tax\_Id=10090 Gene\_Symbol=Kif1a Uncharacterized protein (Fragment)

| Observed  | Mr(expt)  | Mr(calc)  | ppm    | Start | End | Miss | Ions | Peptide                                                               |
|-----------|-----------|-----------|--------|-------|-----|------|------|-----------------------------------------------------------------------|
| 987.5855  | 986.5783  | 986.5913  | -13.20 | 1     | 8   | 0    | ---  | -SVLTWLLR.E                                                           |
| 1113.6457 | 1112.6384 | 1112.6454 | -6.32  | 839   | 846 | 1    | ---  | K <sub>2</sub> TRHYLLR.E + Acetyl (N-term)                            |
| 2020.0703 | 2019.0630 | 2019.0306 | 16.1   | 95    | 114 | 0    | ---  | K <sub>2</sub> LTNALVGMSPSSSLALSSR.A + Acetyl (N-term)                |
| 2036.0456 | 2035.0383 | 2035.0255 | 6.26   | 95    | 114 | 0    | ---  | K <sub>2</sub> LTNALVGMSPSSSLALSSR.A + Acetyl (N-term); Oxidation (M) |
| 2045.8648 | 2044.8575 | 2044.9313 | -36.07 | 308   | 325 | 0    | ---  | R.TPCAETPAEPVDWAFQRE                                                  |
| 2572.2969 | 2571.2896 | 2571.1852 | 40.6   | 684   | 704 | 0    | ---  | R <sub>2</sub> TFYQFEAAWDSSMHNSLLNR.V + Acetyl (N-term)               |
| 2592.2864 | 2591.2791 | 2591.2321 | 18.1   | 712   | 733 | 0    | ---  | K.IYMTLSAYIEMENCTQPAVITK.D + Oxidation (M)                            |

**No match to:** 1113.1180, 1247.6863, 2067.3899, 2082.0797, 2505.2555, 2590.3160

7. [IPI00895307](#) Mass: 76327 Score: 36 Expect: 16 Matches: 5

Tax\_Id=10090 Gene\_Symbol=Ccdc30 Isoform 2 of Coiled-coil domain-containing protein 30

| Observed  | Mr(expt)  | Mr(calc)  | ppm    | Start | End | Miss | Ions | Peptide                                             |
|-----------|-----------|-----------|--------|-------|-----|------|------|-----------------------------------------------------|
| 1113.6457 | 1112.6384 | 1112.6077 | 27.6   | 144   | 152 | 0    | ---  | R <sub>2</sub> LDEEILALR.N + Acetyl (N-term)        |
| 1247.6863 | 1246.6790 | 1246.6517 | 21.9   | 126   | 136 | 1    | ---  | K.LKESGTTDLQR.A                                     |
| 2020.0703 | 2019.0630 | 2019.0194 | 21.6   | 499   | 515 | 1    | ---  | R.KLLEQVTDQEELICSSK.C                               |
| 2036.0456 | 2035.0383 | 2034.9429 | 46.9   | 164   | 180 | 1    | ---  | K <sub>2</sub> YLTSGEKTSQHQGELR.E + Acetyl (N-term) |
| 2590.3160 | 2589.3087 | 2589.3546 | -17.70 | 476   | 497 | 1    | ---  | K.IEMEKVFQIQMAQNDILLEK.R                            |

**No match to:** 987.5855, 1113.1180, 2045.8648, 2067.3899, 2082.0797, 2505.2555, 2572.2969, 2592.2864

8. [IPI00224237](#) Mass: 105043 Score: 35 Expect: 17 Matches: 4

Tax\_Id=10090 Gene\_Symbol=Tmtc3 Isoform 1 of Transmembrane and TPR repeat-containing protein 3

| Observed  | Mr(expt)  | Mr(calc)  | ppm    | Start | End | Miss | Ions | Peptide                                                    |
|-----------|-----------|-----------|--------|-------|-----|------|------|------------------------------------------------------------|
| 987.5855  | 986.5783  | 986.5582  | 20.3   | 581   | 588 | 1    | ---  | K <sub>2</sub> MNKPLKAK.E + Acetyl (N-term); Oxidation (M) |
| 2505.2555 | 2504.2482 | 2504.3611 | -45.08 | 528   | 549 | 1    | ---  | R.IAPNHLNVYINLANLIRANESR.L                                 |
| 2572.2969 | 2571.2896 | 2571.3842 | -36.80 | 637   | 659 | 1    | ---  | K.LALFNSAILMQESGEVKLRPEAR.K                                |
| 2592.2864 | 2591.2791 | 2591.3894 | -42.56 | 124   | 148 | 0    | 12   | R.SSMIAALLFAVHPIHTEAVTGVVGR.A + Oxidation (M)              |

**No match to:** 1113.1180, 1113.6457, 1247.6863, 2020.0703, 2036.0456, 2045.8648, 2067.3899, 2082.0797, 2590.3160

9. [IPI00649923](#) Mass: 14695 Score: 34 Expect: 26 Matches: 3

Tax\_Id=10090 Gene\_Symbol=Tgtp2;Tgtp1 Uncharacterized protein

| Observed  | Mr(expt)  | Mr(calc)  | ppm    | Start | End | Miss | Ions | Peptide                                                                |
|-----------|-----------|-----------|--------|-------|-----|------|------|------------------------------------------------------------------------|
| 1113.6457 | 1112.6384 | 1112.6917 | -47.92 | 41    | 50  | 1    | ---  | K.AVSVIEKVL.R.D                                                        |
| 1247.6863 | 1246.6790 | 1246.6227 | 45.2   | 85    | 97  | 0    | ---  | K.GAAPTGAIEETMKR                                                       |
| 2590.3160 | 2589.3087 | 2589.2771 | 12.2   | 17    | 37  | 1    | ---  | R <sub>2</sub> ESKIIEYDITLIMTYIEENK.L + Acetyl (N-term); Oxidation (M) |

**No match to:** 987.5855, 1113.1180, 2020.0703, 2036.0456, 2045.8648, 2067.3899, 2082.0797, 2505.2555, 2572.2969, 2592.2864

10. [IPI01027494](#) Mass: 14245 Score: 33 Expect: 32 Matches: 2

Tax\_Id=10090 Gene\_Symbol=Wdfy3 Protein

| Observed  | Mr(expt)  | Mr(calc)  | ppm  | Start | End | Miss | Ions | Peptide                                                             |
|-----------|-----------|-----------|------|-------|-----|------|------|---------------------------------------------------------------------|
| 2082.0797 | 2081.0725 | 2081.0258 | 22.4 | 31    | 47  | 1    | ---  | R <sub>2</sub> NQQVMCEAGLHARLLQR.C + Acetyl (N-term); Oxidation (M) |
| 2592.2864 | 2591.2791 | 2591.2009 | 30.2 | 48    | 69  | 1    | 10   | R <sub>2</sub> CGAALADEDHSLHPPLQRMFER.L + Acetyl (N-term)           |

**No match to:** 987.5855, 1113.1180, 1113.6457, 1247.6863, 2020.0703, 2036.0456, 2045.8648, 2067.3899, 2505.2555, 2572.2969, 2590.3160

## Search Parameters

Type of search : MS/MS Ion Search  
Enzyme : Trypsin  
Fixed modifications : Carbamidomethyl (C)  
Variable modifications : Acetyl (N-term), Oxidation (M)  
Mass values : Monoisotopic  
Protein Mass : Unrestricted  
Peptide Mass Tolerance :  $\pm 50$  ppm  
Fragment Mass Tolerance:  $\pm 0.5$  Da  
Max Missed Cleavages : 1  
Instrument type : MALDI-TOF-TOF  
Query1 (987.5855,1+) : <no title>  
Query2 (1113.1180,1+) : <no title>  
Query3 (1113.6457,1+) : <no title>  
Query4 (1247.6863,1+) : <no title>  
Query5 (2020.0703,1+) : <no title>  
Query6 (2036.0456,1+) : <no title>  
Query7 (2045.8648,1+) : <no title>  
Query8 (2067.3899,1+) : <no title>  
Query9 (2082.0797,1+) : <no title>  
Query10 (2505.2555,1+) : <no title>  
Query11 (2572.2969,1+) : <no title>  
Query12 (2590.3160,1+) : <no title>  
Query13 (2592.2864,1+) : <no title>

**Mascot:** <http://www.matrixscience.com/>

# MASCOT Search Results

**User** :  
**Email** :  
**Search title** : Auto submitted by BioTools  
**Database** : SwissProt 57.15 (515203 sequences; 181334896 residues)  
**Taxonomy** : Mus. (16281 sequences)  
**Timestamp** : 20 May 2013 at 01:34:21 GMT  
**Warning** : A Peptide summary report will usually give a much clearer picture of MS/MS search results.  
**Top Score** : 90 for 1433Z\_MOUSE, 14-3-3 protein zeta/delta OS=Mus musculus GN=Ywhaz PE=1 SV=1

## Mascot Score Histogram

Protein score is  $-10 \cdot \log(P)$ , where P is the probability that the observed match is a random event.

Protein scores greater than 55 are significant ( $p < 0.05$ ).

Protein scores are derived from ions scores as a non-probabilistic basis for ranking protein hits.

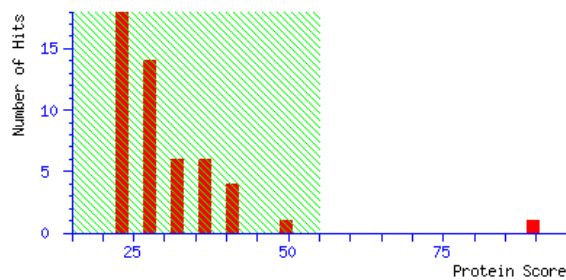

## Protein Summary Report

### Index

| Accession                       | Mass   | Score | Description                                                                                                                                        |
|---------------------------------|--------|-------|----------------------------------------------------------------------------------------------------------------------------------------------------|
| 1. <a href="#">1433Z_MOUSE</a>  | 27925  | 90    | 14-3-3 protein zeta/delta OS=Mus musculus GN=Ywhaz PE=1 SV=1                                                                                       |
| 2. <a href="#">1433B_MOUSE</a>  | 28183  | 50    | 14-3-3 protein beta/alpha OS=Mus musculus GN=Ywhab PE=1 SV=3                                                                                       |
| 3. <a href="#">1433F_MOUSE</a>  | 28365  | 43    | 14-3-3 protein eta OS=Mus musculus GN=Ywhah PE=1 SV=2                                                                                              |
| 4. <a href="#">ODO2_MOUSE</a>   | 49306  | 41    | Dihydrolipoyllysine-residue succinyltransferase component of 2-oxoglutarate dehydrogenase complex, mitochondrial OS=Mus musculus GN=Dlst PE=1 SV=1 |
| 5. <a href="#">PMS2_MOUSE</a>   | 96192  | 39    | Mismatch repair endonuclease PMS2 OS=Mus musculus GN=Pms2 PE=1 SV=1                                                                                |
| 6. <a href="#">CR034_MOUSE</a>  | 103669 | 39    | Uncharacterized protein C18orf34 homolog OS=Mus musculus PE=2 SV=1                                                                                 |
| 7. <a href="#">EGFR_MOUSE</a>   | 138187 | 37    | Epidermal growth factor receptor OS=Mus musculus GN=Egfr PE=1 SV=1                                                                                 |
| 8. <a href="#">1433E_MOUSE</a>  | 29326  | 36    | 14-3-3 protein epsilon OS=Mus musculus GN=Ywhae PE=1 SV=1                                                                                          |
| 9. <a href="#">DIDO1_MOUSE</a>  | 248621 | 35    | Death-inducer obliterator 1 OS=Mus musculus GN=Dido1 PE=1 SV=4                                                                                     |
| 10. <a href="#">1433G_MOUSE</a> | 28456  | 35    | 14-3-3 protein gamma OS=Mus musculus GN=Ywhag PE=1 SV=2                                                                                            |

### Results List

1. 1433Z\_MOUSE Mass: 27925 Score: 90 Expect: 1.8e-005 Matches: 7

14-3-3 protein zeta/delta OS=Mus musculus GN=Ywhaz PE=1 SV=1

| Observed  | Mr(expt)  | Mr(calc)  | ppm  | Start | End   | Miss | Ions | Peptide                       |
|-----------|-----------|-----------|------|-------|-------|------|------|-------------------------------|
| 804.4280  | 803.4207  | 803.4025  | 22.7 | 69    | - 75  | 1    | ---  | K_TEGAEKK.Q + Acetyl (N-term) |
| 1108.5937 | 1107.5864 | 1107.5495 | 33.3 | 159   | - 167 | 0    | ---  | K.EMQPTHPIR.L                 |
| 1124.5862 | 1123.5789 | 1123.5444 | 30.7 | 159   | - 167 | 0    | ---  | K.EMQPTHPIR.L + Oxidation (M) |
| 1189.6879 | 1188.6806 | 1188.6536 | 22.7 | 213   | - 222 | 0    | 24   | K.DSTLIMQLLR.D                |
| 1548.7299 | 1547.7226 | 1547.7063 | 10.5 | 28    | - 41  | 0    | 19   | K.SVTEQGAELSNEER.N            |
| 2160.1359 | 2159.1286 | 2159.1143 | 6.62 | 86    | - 103 | 1    | ---  | K.IETELRDICNDVLSLEK.F         |
| 2317.2136 | 2316.2064 | 2316.2041 | 0.96 | 168   | - 187 | 0    | ---  | R.LGLALNFSVFYYEILNSPEK.A      |

No match to: 848.3718, 854.4174, 932.5303, 1352.6935, 1419.7566, 1440.7325, 1557.9011, 1576.7662, 2062.9930, 2331.2228, 2339.2135, 2355.1820, 2691.2805, 2748.3076, 2780.4173

2. 1433B\_MOUSE Mass: 28183 Score: 50 Expect: 0.17 Matches: 5

14-3-3 protein beta/alpha OS=Mus musculus GN=Ywhab PE=1 SV=3

| Observed  | Mr(expt)  | Mr(calc)  | ppm   | Start | End   | Miss | Ions | Peptide                       |
|-----------|-----------|-----------|-------|-------|-------|------|------|-------------------------------|
| 1108.5937 | 1107.5864 | 1107.5495 | 33.3  | 161   | - 169 | 0    | ---  | K.EMQPTHPIR.L                 |
| 1124.5862 | 1123.5789 | 1123.5444 | 30.7  | 161   | - 169 | 0    | ---  | K.EMQPTHPIR.L + Oxidation (M) |
| 1189.6879 | 1188.6806 | 1188.6536 | 22.7  | 215   | - 224 | 0    | 24   | K.DSTLIMQLLR.D                |
| 1419.7566 | 1418.7494 | 1418.7518 | -1.69 | 59    | - 70  | 1    | ---  | R.SSWRVISSIEQK.T              |
| 2317.2136 | 2316.2064 | 2316.2041 | 0.96  | 170   | - 189 | 0    | ---  | R.LGLALNFSVFYYEILNSPEK.A      |

No match to: 804.4280, 848.3718, 854.4174, 932.5303, 1352.6935, 1440.7325, 1548.7299, 1557.9011, 1576.7662, 2062.9930, 2160.1359, 2331.2228, 2339.2135, 2355.1820, 2691.2805, 2748.3076, 2780.4173

3. 1433F\_MOUSE Mass: 28365 Score: 43 Expect: 0.85 Matches: 3

14-3-3 protein eta OS=Mus musculus GN=Ywhah PE=1 SV=2

| Observed  | Mr(expt)  | Mr(calc)  | ppm   | Start | End   | Miss | Ions | Peptide                          |
|-----------|-----------|-----------|-------|-------|-------|------|------|----------------------------------|
| 1108.5937 | 1107.5864 | 1107.5448 | 37.6  | 133   | - 142 | 0    | ---  | R_YLAEVASGEK.K + Acetyl (N-term) |
| 1189.6879 | 1188.6806 | 1188.6536 | 22.7  | 218   | - 227 | 0    | 24   | K.DSTLIMQLLR.D                   |
| 1419.7566 | 1418.7494 | 1418.7518 | -1.69 | 58    | - 69  | 1    | ---  | R.SSWRVISSIEQK.T                 |

No match to: 804.4280, 848.3718, 854.4174, 932.5303, 1124.5862, 1352.6935, 1440.7325, 1548.7299, 1557.9011, 1576.7662, 2062.9930, 2160.1359, 2317.2136, 2331.2228, 2339.2135, 2355.1820, 2691.2805, 2748.3076, 2780.4173

4. ODO2\_MOUSE Mass: 49306 Score: 41 Expect: 1.3 Matches: 7

Dihydrolypoyllysine-residue succinyltransferase component of 2-oxoglutarate dehydrogenase complex, mitochondrial OS=Mus musculus GN=Dlst PE=1 SV=1

| Observed  | Mr(expt)  | Mr(calc)  | ppm    | Start | End   | Miss | Ions | Peptide                             |
|-----------|-----------|-----------|--------|-------|-------|------|------|-------------------------------------|
| 854.4174  | 853.4101  | 853.4518  | -48.90 | 219   | - 225 | 1    | 2    | K.GLRSEHR.E                         |
| 1189.6879 | 1188.6806 | 1188.6503 | 25.5   | 135   | - 145 | 0    | ---  | K.VEGGTPLFTLR.K                     |
| 1419.7566 | 1418.7494 | 1418.7405 | 6.22   | 314   | - 326 | 0    | ---  | R.DYIDISVAVATPR.G                   |
| 1576.7662 | 1575.7589 | 1575.7827 | -15.12 | 15    | - 28  | 1    | ---  | R_SLSAFQKGNCPGR.R + Acetyl (N-term) |
| 2339.2135 | 2338.2062 | 2338.1110 | 40.7   | 335   | - 354 | 1    | ---  | R.NVETMNYADIERTINELGEK.A            |

2355.1820 2354.1747 2354.1060 29.2 335 - 354 1 --- R.NVETMNYADIERTINELGEK.A + Oxidation (M)

2691.2805 2690.2732 2690.3188 -16.94 69 - 92 1 --- K.NDVITVQTPAFAESVTEGDVREK.A

**No match to:** 804.4280, 848.3718, 932.5303, 1108.5937, 1124.5862, 1352.6935, 1440.7325, 1548.7299, 1557.9011, 2062.9930, 2160.1359, 2317.2136, 2331.2228, 2748.3076, 2780.4173

5. PMS2\_MOUSE Mass: 96192 Score: 39 Expect: 2.1 Matches: 8

Mismatch repair endonuclease PMS2 OS=Mus musculus GN=Pms2 PE=1 SV=1

**Observed Mr(expt) Mr(calc) ppm Start End Miss Ions Peptide**

804.4280 803.4207 803.3926 35.0 638 - 643 0 --- K.HELSYR.K

848.3718 847.3646 847.4035 -45.98 408 - 414 1 --- K.STADEKR.V + Acetyl (N-term)

932.5303 931.5230 931.4875 38.1 638 - 644 1 --- K.HELSYRK.F

1440.7325 1439.7252 1439.6602 45.1 357 - 369 0 --- K.TSLIGMFSDANK.L + Acetyl (N-term)

1548.7299 1547.7226 1547.7185 2.68 211 - 224 1 --- K.RHAVVCTSGTSGMK.E + Acetyl (N-term); Oxidation (M)

2317.2136 2316.2064 2316.1534 22.9 668 - 687 0 --- K.SMFAEMEILGQFNLFIVTK.L + Acetyl (N-term)

2331.2228 2330.2155 2330.1763 16.8 180 - 199 1 --- K.EYSKMQVQLQAYCIISAGVR.V + Oxidation (M)

2748.3076 2747.3003 2747.3914 -33.16 664 - 687 1 --- K.EISKSMFAEMEILGQFNLFIVTK.L + Oxidation (M)

**No match to:** 854.4174, 1108.5937, 1124.5862, 1189.6879, 1352.6935, 1419.7566, 1557.9011, 1576.7662, 2062.9930, 2160.1359, 2339.2135, 2355.1820, 2691.2805, 2780.4173

6. CR034\_MOUSE Mass: 103669 Score: 39 Expect: 2.2 Matches: 5

Uncharacterized protein C18orf34 homolog OS=Mus musculus PE=2 SV=1

**Observed Mr(expt) Mr(calc) ppm Start End Miss Ions Peptide**

804.4280 803.4207 803.4211 -0.49 23 - 28 0 --- K.TCLQIK.E + Acetyl (N-term)

1189.6879 1188.6806 1188.6284 43.9 673 - 681 1 22 K.EIRIMNLER.T + Oxidation (M)

1419.7566 1418.7494 1418.7405 6.23 425 - 436 1 --- K.KTWDIELSNVSK.D

1548.7299 1547.7226 1547.7315 -5.72 377 - 389 0 --- R.ETQSTTNELENL.K + Acetyl (N-term)

2160.1359 2159.1286 2159.0609 31.4 554 - 570 0 --- R.LYAIETQFIEMQEFIR.R

**No match to:** 848.3718, 854.4174, 932.5303, 1108.5937, 1124.5862, 1352.6935, 1440.7325, 1557.9011, 1576.7662, 2062.9930, 2317.2136, 2331.2228, 2339.2135, 2355.1820, 2691.2805, 2748.3076, 2780.4173

7. EGFR\_MOUSE Mass: 138187 Score: 37 Expect: 3.2 Matches: 6

Epidermal growth factor receptor OS=Mus musculus GN=Egfr PE=1 SV=1

**Observed Mr(expt) Mr(calc) ppm Start End Miss Ions Peptide**

1189.6879 1188.6806 1188.6350 38.4 347 - 357 0 12 K.DTSLINATNIK.H

1352.6935 1351.6862 1351.7169 -22.73 965 - 975 1 --- R.ELILEFSKMAR.D + Oxidation (M)

2317.2136 2316.2064 2316.2089 -1.09 358 - 377 1 --- K.HFKYCTAISGDLHILPVAFK.G

2331.2228 2330.2155 2330.1035 48.1 54 - 72 0 --- R.MYNNCEVVLGNLEITYVQR.N + Oxidation (M)

2339.2135 2338.2062 2338.3121 -45.31 430 - 451 1 --- R.TKQHQFSLAVVGLNITSLGLR.S

2780.4173 2779.4100 2779.3341 27.3 1034 - 1059 1 --- R.TPLLSLSATSNNSTVACINRNGSCR.V

**No match to:** 804.4280, 848.3718, 854.4174, 932.5303, 1108.5937, 1124.5862, 1419.7566, 1440.7325, 1548.7299, 1557.9011, 1576.7662, 2062.9930, 2160.1359, 2355.1820, 2691.2805, 2748.3076

8. 1433E\_MOUSE Mass: 29326 Score: 36 Expect: 3.7 Matches: 2



14-3-3 protein epsilon OS=Mus musculus GN=Ywhae PE=1 SV=1

**Observed Mr(expt) Mr(calc) ppm Start End Miss Ions Peptide**

1189.6879 1188.6806 1188.6536 22.7 216 - 225 0 24 K.DSTLIMQLLR.D

2331.2228 2330.2155 2330.1947 8.95 171 - 190 0 --- R.LGLALNFSVFYIEILNSPDR.A

**No match to:** 804.4280, 848.3718, 854.4174, 932.5303, 1108.5937, 1124.5862, 1352.6935, 1419.7566, 1440.7325, 1548.7299, 1557.9011, 1576.7662, 2062.9930, 2160.1359, 2317.2136, 2339.2135, 2355.1820, 2691.2805, 2748.3076, 2780.4173

**9. DIDO1\_MOUSE Mass: 248621 Score: 35 Expect: 4.8 Matches: 11**

Death-inducer obliterator 1 OS=Mus musculus GN=Dido1 PE=1 SV=4

**Observed Mr(expt) Mr(calc) ppm Start End Miss Ions Peptide**

804.4280 803.4207 803.3926 35.0 2178 - 2183 1 --- R.AKEWDR.S

848.3718 847.3646 847.3936 -34.31 2180 - 2185 1 --- K.EWDRSR.E

932.5303 931.5230 931.5338 -11.58 780 - 787 1 --- R.TKLLNESK.K

1352.6935 1351.6862 1351.7500 -47.18 381 - 393 0 --- K.IFQPVVEAPGAPK.C

1419.7566 1418.7494 1418.7042 31.9 1035 - 1047 0 --- R.SPPEGDTTLFLSR.L

1557.9011 1556.8938 1556.8384 35.5 571 - 585 0 --- K.LPPYSNMAGAKPAIK.K

2062.9930 2061.9857 2062.0405 -26.56 763 - 779 1 --- K.ELSMWTEKPTKSVIESR.T + Acetyl (N-term)

2317.2136 2316.2064 2316.1233 35.9 2103 - 2123 1 --- R.FEAGSKEKPLDEPEAQGLSR.Q

2339.2135 2338.2062 2338.1720 14.6 1916 - 1938 1 --- R.GGPPPSQFGAQRGPPPGHFVGPGR.G + Acetyl (N-term)

2691.2805 2690.2732 2690.2644 3.26 38 - 61 1 --- R.EGAGDTEVDPSEQPQQHNLRLRR.S

2780.4173 2779.4100 2779.3375 26.1 1345 - 1369 1 --- K.GEDTMSAAPLLDPVQQFGQFSKDK.A + Acetyl (N-term); Oxidation (M)

**No match to:** 854.4174, 1108.5937, 1124.5862, 1189.6879, 1440.7325, 1548.7299, 1576.7662, 2160.1359, 2331.2228, 2355.1820, 2748.3076

**10. 1433G\_MOUSE Mass: 28456 Score: 35 Expect: 5.3 Matches: 2**

14-3-3 protein gamma OS=Mus musculus GN=Ywhag PE=1 SV=2

**Observed Mr(expt) Mr(calc) ppm Start End Miss Ions Peptide**

1189.6879 1188.6806 1188.6536 22.7 218 - 227 0 24 K.DSTLIMQLLR.D

1419.7566 1418.7494 1418.7518 -1.69 58 - 69 1 --- R.SSWRVISSIEQK.T

**No match to:** 804.4280, 848.3718, 854.4174, 932.5303, 1108.5937, 1124.5862, 1352.6935, 1440.7325, 1548.7299, 1557.9011, 1576.7662, 2062.9930, 2160.1359, 2317.2136, 2331.2228, 2339.2135, 2355.1820, 2691.2805, 2748.3076, 2780.4173

**Search Parameters**

**Type of search** : MS/MS Ion Search

**Enzyme** : Trypsin

**Fixed modifications** : Carbamidomethyl (C)

**Variable modifications** : Acetyl (N-term), Oxidation (M)

**Mass values** : Monoisotopic

**Protein Mass** : Unrestricted

**Peptide Mass Tolerance** :  $\pm 50$  ppm

**Fragment Mass Tolerance**:  $\pm 0.5$  Da

**Max Missed Cleavages** : 1

**Instrument type** : MALDI-TOF-TOF

**Query1 (804.4280,1+)** : <no title>

**Query2 (848.3718,1+)** : <no title>

**Query3 (854.4174,1+)** : <no title>

**Query4 (932.5303,1+)** : <no title>

**Query5 (1108.5937,1+)** : <no title>

**Query6 (1124.5862,1+)** : <no title>

**Query7 (1189.6879,1+)** : <no title>

**Query8 (1352.6935,1+)** : <no title>

**Query9 (1419.7566,1+)** : <no title>

**Query10 (1440.7325,1+)** : <no title>

**Query11 (1548.7299,1+)** : <no title>

**Query12 (1557.9011,1+)** : <no title>

**Query13 (1576.7662,1+)** : <no title>

**Query14 (2062.9930,1+)** : <no title>

**Query15 (2160.1359,1+)** : <no title>

**Query16 (2317.2136,1+)** : <no title>

**Query17 (2331.2228,1+)** : <no title>

**Query18 (2339.2135,1+)** : <no title>

**Query19 (2355.1820,1+)** : <no title>

**Query20 (2691.2805,1+)** : <no title>

**Query21 (2748.3076,1+)** : <no title>

**Query22 (2780.4173,1+)** : <no title>

**Mascot:** <http://www.matrixscience.com/>

# **MASCOT** Mascot Search Results

**User** :  
**Email** :  
**Search title** : Auto submitted by BioTools  
**Database** : SwissProt 57.15 (515203 sequences; 181334896 residues)  
**Taxonomy** : Mus. (16281 sequences)  
**Timestamp** : 20 May 2013 at 01:29:19 GMT  
**Warning** : A Peptide summary report will usually give a much clearer picture of MS/MS search results.  
**Top Score** : 131 for GRP78\_MOUSE, 78 kDa glucose-regulated protein OS=Mus musculus GN=Hspa5 PE=1 SV=3

## Mascot Score Histogram

Protein score is  $-10 \cdot \log(P)$ , where P is the probability that the observed match is a random event.

Protein scores greater than 55 are significant ( $p < 0.05$ ).

Protein scores are derived from ions scores as a non-probabilistic basis for ranking protein hits.

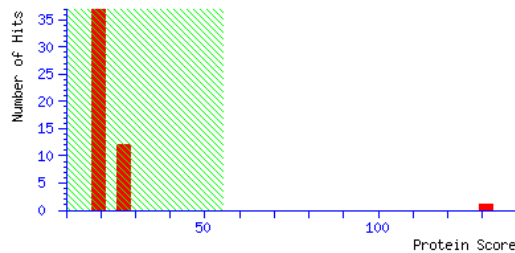

## Protein Summary Report

### Index

| Accession                       | Mass   | Score | Description                                                                                                       |
|---------------------------------|--------|-------|-------------------------------------------------------------------------------------------------------------------|
| 1. <a href="#">GRP78_MOUSE</a>  | 72492  | 131   | 78 kDa glucose-regulated protein OS=Mus musculus GN=Hspa5 PE=1 SV=3                                               |
| 2. <a href="#">PRS10_MOUSE</a>  | 44430  | 30    | 26S protease regulatory subunit S10B OS=Mus musculus GN=Psmc6 PE=1 SV=1                                           |
| 3. <a href="#">FA18B_MOUSE</a>  | 23575  | 30    | Protein FAM18B OS=Mus musculus GN=Fam18b PE=1 SV=1                                                                |
| 4. <a href="#">P3C2A_MOUSE</a>  | 192462 | 28    | Phosphatidylinositol-4-phosphate 3-kinase C2 domain-containing subunit alpha OS=Mus musculus GN=Pik3c2a PE=1 SV=2 |
| 5. <a href="#">IL18_MOUSE</a>   | 22349  | 28    | Interleukin-18 OS=Mus musculus GN=Il18 PE=1 SV=2                                                                  |
| 6. <a href="#">TRHDE_MOUSE</a>  | 117897 | 27    | Thyrotropin-releasing hormone-degrading ectoenzyme OS=Mus musculus GN=Trhde PE=2 SV=1                             |
| 7. <a href="#">KLDC9_MOUSE</a>  | 38845  | 25    | Kelch domain-containing protein 9 OS=Mus musculus GN=Klhdc9 PE=2 SV=1                                             |
| 8. <a href="#">TSYL5_MOUSE</a>  | 44504  | 25    | Testis-specific Y-encoded-like protein 5 OS=Mus musculus GN=Tspy15 PE=2 SV=2                                      |
| 9. <a href="#">KCD12_MOUSE</a>  | 36155  | 25    | BTB/POZ domain-containing protein KCTD12 OS=Mus musculus GN=Kctd12 PE=1 SV=1                                      |
| 10. <a href="#">MCF2L_MOUSE</a> | 130493 | 24    | Guanine nucleotide exchange factor DBS OS=Mus musculus GN=Mcf2l PE=1 SV=1                                         |

## Results List

1. GRP78\_MOUSE Mass: 72492 Score: 131 Expect: 1.3e-009 Matches: 9

78 kDa glucose-regulated protein OS=Mus musculus GN=Hspa5 PE=1 SV=3

| Observed  | Mr(expt)  | Mr(calc)  | ppm  | Start | End   | Miss | Ions | Peptide                |
|-----------|-----------|-----------|------|-------|-------|------|------|------------------------|
| 1191.6687 | 1190.6615 | 1190.6295 | 26.8 | 466   | - 475 | 0    | ---  | K.VYEGERPLTK.D         |
| 1217.6661 | 1216.6588 | 1216.6234 | 29.1 | 187   | - 198 | 0    | ---  | K.DAGTIAGLNVMR.I       |
| 1512.8098 | 1511.8026 | 1511.7442 | 38.6 | 326   | - 337 | 1    | ---  | R.AKFEELNMDLFR.S       |
| 1566.8356 | 1565.8283 | 1565.7726 | 35.6 | 62    | - 75  | 0    | ---  | R.ITPSYVAFTPEGER.L     |
| 1588.9333 | 1587.9260 | 1587.8468 | 49.9 | 354   | - 368 | 1    | ---  | K.KSDIDEIVLVGGSTR.I    |
| 1816.0400 | 1815.0327 | 1814.9890 | 24.1 | 199   | - 215 | 1    | ---  | R.IINEPTAAAIAYGLDKR.E  |
| 1888.0319 | 1887.0246 | 1886.9639 | 32.1 | 166   | - 182 | 0    | ---  | K.VTHAVVTVPAYFNDAQR.Q  |
| 1934.0600 | 1933.0527 | 1933.0058 | 24.3 | 476   | - 493 | 0    | 38   | K.DNHLLGTFDLTGIPPAPR.G |
| 1999.1357 | 1998.1284 | 1998.0786 | 24.9 | 494   | - 511 | 0    | ---  | R.GVPQIEVTFEIDVNGILR.V |

No match to: 997.5797, 1460.8365, 2691.3421

2. PRS10\_MOUSE Mass: 44430 Score: 30 Expect: 17 Matches: 4

26S protease regulatory subunit S10B OS=Mus musculus GN=Psmc6 PE=1 SV=1

| Observed  | Mr(expt)  | Mr(calc)  | ppm    | Start | End   | Miss | Ions | Peptide                                 |
|-----------|-----------|-----------|--------|-------|-------|------|------|-----------------------------------------|
| 1191.6687 | 1190.6615 | 1190.6547 | 5.70   | 380   | - 389 | 1    | ---  | K.LESKLDYKPV.-                          |
| 1460.8365 | 1459.8293 | 1459.8762 | -32.17 | 310   | - 322 | 1    | ---  | R.LDILKIHAGPITK.H + Acetyl (N-term)     |
| 1816.0400 | 1815.0327 | 1814.9713 | 33.8   | 169   | - 185 | 1    | ---  | K.GCLLYGPPGTGKTLRAR.A + Acetyl (N-term) |
| 1888.0319 | 1887.0246 | 1887.0578 | -17.58 | 299   | - 314 | 1    | ---  | K.IHIDLPNQARLDILK.I                     |

No match to: 997.5797, 1217.6661, 1512.8098, 1566.8356, 1588.9333, 1934.0600, 1999.1357, 2691.3421

3. FA18B\_MOUSE Mass: 23575 Score: 30 Expect: 17 Matches: 3

Protein FAM18B OS=Mus musculus GN=Fam18b PE=1 SV=1

| Observed  | Mr(expt)  | Mr(calc)  | ppm  | Start | End   | Miss | Ions | Peptide                                               |
|-----------|-----------|-----------|------|-------|-------|------|------|-------------------------------------------------------|
| 1217.6661 | 1216.6588 | 1216.5989 | 49.3 | 102   | - 110 | 1    | ---  | K.SHWVFESRK.S + Acetyl (N-term)                       |
| 1816.0400 | 1815.0327 | 1814.9733 | 32.7 | 31    | - 44  | 1    | ---  | K.IRHPVASFFHLFFR.V + Acetyl (N-term)                  |
| 1888.0319 | 1887.0246 | 1886.9560 | 36.3 | 181   | - 196 | 1    | ---  | K.NLTSMATSYLGKQFLR.Q + Acetyl (N-term); Oxidation (M) |

No match to: 997.5797, 1191.6687, 1460.8365, 1512.8098, 1566.8356, 1588.9333, 1934.0600, 1999.1357, 2691.3421

4. P3C2A\_MOUSE Mass: 192462 Score: 28 Expect: 23 Matches: 6

Phosphatidylinositol-4-phosphate 3-kinase C2 domain-containing subunit alpha OS=Mus musculus GN=Pik3c2a PE=1 SV=2

| Observed  | Mr(expt)  | Mr(calc)  | ppm    | Start | End    | Miss | Ions | Peptide                                                 |
|-----------|-----------|-----------|--------|-------|--------|------|------|---------------------------------------------------------|
| 1217.6661 | 1216.6588 | 1216.6598 | -0.78  | 1072  | - 1081 | 1    | ---  | R.QVVLQKSMER.V                                          |
| 1512.8098 | 1511.8026 | 1511.8235 | -13.87 | 226   | - 238  | 1    | ---  | K.LFEKIASTSEFLK.N                                       |
| 1566.8356 | 1565.8283 | 1565.7990 | 18.7   | 1436  | - 1447 | 1    | ---  | K.YNPDKHYTYVVR.I                                        |
| 1888.0319 | 1887.0246 | 1886.9825 | 22.3   | 905   | - 920  | 1    | ---  | K.HPNCLPKILASAPNWK.W + Acetyl (N-term)                  |
| 1934.0600 | 1933.0527 | 1932.9649 | 45.5   | 1139  | - 1154 | 1    | ---  | K.VGEDLRQDMLALQMIK.I + Acetyl (N-term); 2 Oxidation (M) |
| 2691.3421 | 2690.3348 | 2690.4142 | -29.49 | 927   | - 949  | 0    | ---  | K.TYSLHQWPPLCPLAALELLDAK.F + Acetyl (N-term)            |

No match to: 997.5797, 1191.6687, 1460.8365, 1588.9333, 1816.0400, 1999.1357

5. IL18\_MOUSE Mass: 22349 Score: 28 Expect: 28 Matches: 3

Interleukin-18 OS=Mus musculus GN=Il18 PE=1 SV=2

**Observed Mr(expt) Mr(calc) ppm Start End Miss Ions Peptide**

1191.6687 1190.6615 1190.6547 5.70 163 - 172 1 --- K.EDDAFKLILK.K  
1217.6661 1216.6588 1216.7027 -36.05 93 - 104 1 --- R.GLAVTLSVKDSK.M  
1460.8365 1459.8293 1459.7783 34.9 49 - 60 1 --- R.NINDQVLFVDKR.Q  
**No match to:** 997.5797, 1512.8098, 1566.8356, 1588.9333, 1816.0400, 1888.0319, 1934.0600, 1999.1357, 2691.3421

**6. TRHDE\_MOUSE Mass: 117897 Score: 27 Expect: 35 Matches: 5**

Thyrotropin-releasing hormone-degrading ectoenzyme OS=Mus musculus GN=Trhde PE=2 SV=1

**Observed Mr(expt) Mr(calc) ppm Start End Miss Ions Peptide**

1191.6687 1190.6615 1190.6520 7.95 29 - 38 1 --- R.TTERHIAVHK.R  
1460.8365 1459.8293 1459.7572 49.4 262 - 274 0 --- R.FLGVTQFSPTHAR.K  
1512.8098 1511.8026 1511.8460 -28.73 180 - 192 1 --- R\_YVVLHASRVAVEK.V + Acetyl (N-term)  
1566.8356 1565.8283 1565.7694 37.6 816 - 828 1 --- R\_REVIMLACSFNGK.H + Acetyl (N-term)  
1588.9333 1587.9260 1587.8522 46.5 262 - 275 1 --- R.FLGVTQFSPTHARK.A  
**No match to:** 997.5797, 1217.6661, 1816.0400, 1888.0319, 1934.0600, 1999.1357, 2691.3421

**7. KLDC9\_MOUSE Mass: 38845 Score: 25 Expect: 50 Matches: 3**

Kelch domain-containing protein 9 OS=Mus musculus GN=Klhdc9 PE=2 SV=1

**Observed Mr(expt) Mr(calc) ppm Start End Miss Ions Peptide**

1217.6661 1216.6588 1216.6346 19.9 1 - 11 1 --- \_MAGVQTLGRAR.G + Acetyl (N-term); Oxidation (M)  
1566.8356 1565.8283 1565.7800 30.9 338 - 350 0 --- R\_TASPVQCILEFFL.+ Acetyl (N-term)  
2691.3421 2690.3348 2690.2660 25.6 315 - 337 1 --- R\_VGHRTCLWNDQLYLVGFGEDGR.T + Acetyl (N-term)  
**No match to:** 997.5797, 1191.6687, 1460.8365, 1512.8098, 1588.9333, 1816.0400, 1888.0319, 1934.0600, 1999.1357

**8. TSYL5\_MOUSE Mass: 44504 Score: 25 Expect: 55 Matches: 3**

Testis-specific Y-encoded-like protein 5 OS=Mus musculus GN=Tspyl5 PE=2 SV=2

**Observed Mr(expt) Mr(calc) ppm Start End Miss Ions Peptide**

1191.6687 1190.6615 1190.6407 17.4 396 - 406 1 --- K\_LSPAPAVRQPN.+ Acetyl (N-term)  
1566.8356 1565.8283 1565.8301 -1.17 110 - 125 0 --- R.LTSDTSFVGTVGALAK.L  
2691.3421 2690.3348 2690.2891 17.0 180 - 205 1 --- K.MTEKHAGAGSPATVGSMDTLETVQLK.L + 2 Oxidation (M)  
**No match to:** 997.5797, 1217.6661, 1460.8365, 1512.8098, 1588.9333, 1816.0400, 1888.0319, 1934.0600, 1999.1357

**9. KCD12\_MOUSE Mass: 36155 Score: 25 Expect: 56 Matches: 3**

BTB/POZ domain-containing protein KCTD12 OS=Mus musculus GN=Kctd12 PE=1 SV=1

**Observed Mr(expt) Mr(calc) ppm Start End Miss Ions Peptide**

997.5797 996.5725 996.5280 44.6 91 - 97 0 --- R\_YILDYLR.D + Acetyl (N-term)  
1888.0319 1887.0246 1886.9864 20.3 128 - 145 1 --- R\_RLGAPQQPGPPPPHSR.R + Acetyl (N-term)  
1934.0600 1933.0527 1932.9945 30.1 113 - 127 1 --- R\_LQREAEYFELPELVR.R + Acetyl (N-term)  
**No match to:** 1191.6687, 1217.6661, 1460.8365, 1512.8098, 1566.8356, 1588.9333, 1816.0400, 1999.1357, 2691.3421

**10. MCF2L\_MOUSE Mass: 130493 Score: 24 Expect: 65 Matches: 5**

Guanine nucleotide exchange factor DBS OS=Mus musculus GN=Mcf2l PE=1 SV=1

| Observed  | Mr(expt)  | Mr(calc)  | ppm    | Start | End   | Miss | Ions | Peptide                                     |
|-----------|-----------|-----------|--------|-------|-------|------|------|---------------------------------------------|
| 1191.6687 | 1190.6615 | 1190.6183 | 36.3   | 511   | - 519 | 0    | --   | <u>K</u> .IQELNEIYK.E + Acetyl (N-term)     |
| 1217.6661 | 1216.6588 | 1216.6234 | 29.1   | 944   | - 953 | 0    | --   | <u>K</u> .VLTSQLQACR.E + Acetyl (N-term)    |
| 1512.8098 | 1511.8026 | 1511.7943 | 5.44   | 410   | - 422 | 0    | --   | <u>R</u> .ALSLEGQQLIENR.H + Acetyl (N-term) |
| 1888.0319 | 1887.0246 | 1887.0690 | -23.55 | 561   | - 577 | 0    | --   | K.QTRPVQPVAPRPEALTKS                        |
| 2691.3421 | 2690.3348 | 2690.2615 | 27.3   | 696   | - 718 | 1    | --   | R.NIPAGVESCIDCEPELVGRCFLER.M                |

**No match to:** 997.5797, 1460.8365, 1566.8356, 1588.9333, 1816.0400, 1934.0600, 1999.1357

#### Search Parameters

**Type of search** : MS/MS Ion Search  
**Enzyme** : Trypsin  
**Fixed modifications** : Carbamidomethyl (C)  
**Variable modifications** : Acetyl (N-term), Oxidation (M)  
**Mass values** : Monoisotopic  
**Protein Mass** : Unrestricted  
**Peptide Mass Tolerance** :  $\pm 50$  ppm  
**Fragment Mass Tolerance**:  $\pm 0.5$  Da  
**Max Missed Cleavages** : 1  
**Instrument type** : MALDI-TOF-TOF  
**Query1 (997.5797,1+)** : <no title>  
**Query2 (1191.6687,1+)** : <no title>  
**Query3 (1217.6661,1+)** : <no title>  
**Query4 (1460.8365,1+)** : <no title>  
**Query5 (1512.8098,1+)** : <no title>  
**Query6 (1566.8356,1+)** : <no title>  
**Query7 (1588.9333,1+)** : <no title>  
**Query8 (1816.0400,1+)** : <no title>  
**Query9 (1888.0319,1+)** : <no title>  
**Query10 (1934.0600,1+)** : <no title>  
**Query11 (1999.1357,1+)** : <no title>  
**Query12 (2691.3421,1+)** : <no title>

**Mascot:** <http://www.matrixscience.com/>

# **MASCOT** Mascot Search Results **SCIENCE**

User :  
Email :  
Search title : Auto submitted by BioTools  
Database : SwissProt 57.15 (515203 sequences; 181334896 residues)  
Taxonomy : Mus. (16281 sequences)  
Timestamp : 20 May 2013 at 01:29:44 GMT  
Warning : A Peptide summary report will usually give a much clearer picture of MS/MS search results.  
Top Score : 156 for VIME\_MOUSE, Vimentin OS=Mus musculus GN=Vim PE=1 SV=3

## Mascot Score Histogram

Protein score is  $-10 \cdot \log(P)$ , where P is the probability that the observed match is a random event.

Protein scores greater than 55 are significant ( $p < 0.05$ ).

Protein scores are derived from ions scores as a non-probabilistic basis for ranking protein hits.

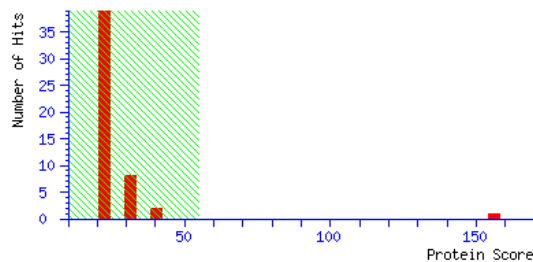

## Protein Summary Report

### Index

| Accession                       | Mass   | Score | Description                                                                   |
|---------------------------------|--------|-------|-------------------------------------------------------------------------------|
| 1. <a href="#">VIME_MOUSE</a>   | 53712  | 156   | Vimentin OS=Mus musculus GN=Vim PE=1 SV=3                                     |
| 2. <a href="#">CCD42_MOUSE</a>  | 37965  | 37    | Coiled-coil domain-containing protein 42A OS=Mus musculus GN=Ccdc42 PE=2 SV=2 |
| 3. <a href="#">CCD56_MOUSE</a>  | 11979  | 36    | Coiled-coil domain-containing protein 56 OS=Mus musculus GN=Ccdc56 PE=2 SV=1  |
| 4. <a href="#">SPIN1_MOUSE</a>  | 29738  | 33    | Spindlin-1 OS=Mus musculus GN=Spin1 PE=1 SV=2                                 |
| 5. <a href="#">GEM15_MOUSE</a>  | 169080 | 33    | Gem-associated protein 5 OS=Mus musculus GN=Gemin5 PE=1 SV=1                  |
| 6. <a href="#">HBAZ_MOUSE</a>   | 16338  | 32    | Hemoglobin subunit zeta OS=Mus musculus GN=Hbz PE=2 SV=2                      |
| 7. <a href="#">MBL1_MOUSE</a>   | 25836  | 30    | Mannose-binding protein A OS=Mus musculus GN=Mbl1 PE=2 SV=1                   |
| 8. <a href="#">KRT36_MOUSE</a>  | 54011  | 29    | Keratin, type I cuticular Ha6 OS=Mus musculus GN=Krt36 PE=1 SV=1              |
| 9. <a href="#">ANXA2_MOUSE</a>  | 38937  | 29    | Annexin A2 OS=Mus musculus GN=Anxa2 PE=1 SV=2                                 |
| 10. <a href="#">MEP1B_MOUSE</a> | 80467  | 28    | Mepripin A subunit beta OS=Mus musculus GN=Mep1b PE=1 SV=1                    |

## Results List

1. [VIME\\_MOUSE](#) Mass: 53712 Score: 156 Expect: 4.1e-012 Matches: 16

Vimentin OS=Mus musculus GN=Vim PE=1 SV=3

| Observed  | Mr(expt)  | Mr(calc)  | ppm  | Start | End | Miss | Ions | Peptide                                |
|-----------|-----------|-----------|------|-------|-----|------|------|----------------------------------------|
| 1046.5487 | 1045.5414 | 1045.5226 | 18.0 | 189   | -   | 196  | 0    | --- K.LQEEMLQR.E                       |
| 1081.5468 | 1080.5395 | 1080.4948 | 41.4 | 314   | -   | 321  | 1    | --- K.QESNEYRR.Q                       |
| 1088.5551 | 1087.5478 | 1087.5332 | 13.4 | 189   | -   | 196  | 0    | --- K.LQEEMLQR.E + Acetyl (N-term)     |
| 1093.5404 | 1092.5331 | 1092.5200 | 12.0 | 295   | -   | 304  | 0    | --- K.FADLSEAANR.N                     |
| 1115.5872 | 1114.5799 | 1114.5618 | 16.2 | 105   | -   | 113  | 0    | --- K.VELQELNDR.F                      |
| 1254.5991 | 1253.5918 | 1253.5598 | 25.6 | 146   | -   | 155  | 0    | --- R.LGDLYEEEMR.E                     |
| 1295.6729 | 1294.6656 | 1294.6591 | 5.03 | 391   | -   | 401  | 0    | --- K.MALDIEIATYR.K                    |
| 1296.6617 | 1295.6544 | 1295.5993 | 42.5 | 197   | -   | 207  | 0    | --- R.EEAESTLQSFR.Q                    |
| 1423.7716 | 1422.7643 | 1422.7540 | 7.23 | 391   | -   | 402  | 1    | --- K.MALDIEIATYRK.L                   |
| 1444.7188 | 1443.7116 | 1443.6994 | 8.42 | 51    | -   | 64   | 0    | 10 R.SLYSSPPGGAYVTR.S                  |
| 1495.7935 | 1494.7862 | 1494.7790 | 4.78 | 37    | -   | 50   | 0    | --- R.TYSLGALRPSTR.S                   |
| 1557.9111 | 1556.9038 | 1556.8926 | 7.21 | 411   | -   | 424  | 0    | 25 R.ISLPLTFSSLNLR.E                   |
| 1587.8070 | 1586.7997 | 1586.7900 | 6.11 | 101   | -   | 113  | 1    | --- R.TNEKVELQELNDR.F                  |
| 1704.8557 | 1703.8484 | 1703.8148 | 19.7 | 171   | -   | 184  | 1    | --- R.VEVERDNLAEDIMR.L + Oxidation (M) |
| 1734.8304 | 1733.8232 | 1733.8076 | 8.97 | 365   | -   | 378  | 1    | --- R.LQDEIQNMKEEMAR.H                 |
| 2200.9913 | 2199.9841 | 2199.9742 | 4.48 | 346   | -   | 364  | 0    | --- R.EMEENFALEAANYQDTIGR.L            |

**No match to:** 854.3130, 1284.7435, 1513.8696, 1542.7860, 1641.7796, 1674.8641, 1723.5763, 2003.0019, 2301.0261, 2330.1460, 2691.3014, 2748.3381

2. CCD42\_MOUSE Mass: 37965 Score: 37 Expect: 3 Matches: 7

Coiled-coil domain-containing protein 42A OS=Mus musculus GN=Ccdc42 PE=2 SV=2

| Observed  | Mr(expt)  | Mr(calc)  | ppm    | Start | End | Miss | Ions | Peptide                                                 |
|-----------|-----------|-----------|--------|-------|-----|------|------|---------------------------------------------------------|
| 1081.5468 | 1080.5395 | 1080.5273 | 11.3   | 203   | -   | 210  | 1    | --- R.LARYMEEK.D + Acetyl (N-term)                      |
| 1093.5404 | 1092.5331 | 1092.5419 | -8.10  | 128   | -   | 136  | 1    | --- K.AKQEMMALR.L + Oxidation (M)                       |
| 1444.7188 | 1443.7116 | 1443.6850 | 18.4   | 50    | -   | 61   | 1    | --- K.EAKIMQEAMEHK.K                                    |
| 1587.8070 | 1586.7997 | 1586.7545 | 28.5   | 130   | -   | 141  | 1    | --- K.QEMMALRLEHQK.L + Acetyl (N-term); 2 Oxidation (M) |
| 2003.0019 | 2001.9946 | 2001.9908 | 1.89   | 88    | -   | 103  | 1    | --- K.AHIQFEQFIQENDQK.R                                 |
| 2200.9913 | 2199.9841 | 2199.9889 | -2.18  | 177   | -   | 195  | 0    | --- K.TLVSMHHDLMQSAQEGQEK.I + 2 Oxidation (M)           |
| 2301.0261 | 2300.0188 | 2300.1338 | -49.99 | 233   | -   | 251  | 1    | --- R.SDVIFWESRWAHIQNTAAK.K + Acetyl (N-term)           |

**No match to:** 854.3130, 1046.5487, 1088.5551, 1115.5872, 1254.5991, 1284.7435, 1295.6729, 1296.6617, 1423.7716, 1495.7935, 1513.8696, 1542.7860, 1557.9111, 1641.7796, 1674.8641, 1704.8557, 1723.5763, 1734.8304, 2330.1460, 2691.3014, 2748.3381

3. CCD56\_MOUSE Mass: 11979 Score: 36 Expect: 4.3 Matches: 4

Coiled-coil domain-containing protein 56 OS=Mus musculus GN=Ccdc56 PE=2 SV=1

| Observed  | Mr(expt)  | Mr(calc)  | ppm    | Start | End | Miss | Ions | Peptide                                     |
|-----------|-----------|-----------|--------|-------|-----|------|------|---------------------------------------------|
| 1081.5468 | 1080.5395 | 1080.5564 | -15.59 | 2     | -   | 13   | 0    | --- M.AAPGAGDPLNAK.N                        |
| 1254.5991 | 1253.5918 | 1253.6074 | -12.42 | 1     | -   | 13   | 0    | --- MAAPGAGDPLNAK.N + Acetyl (N-term)       |
| 1542.7860 | 1541.7787 | 1541.7699 | 5.74   | 14    | -   | 27   | 1    | --- K.NGNAPFAQRIDPSR.E                      |
| 2330.1460 | 2329.1388 | 2329.2365 | -41.96 | 30    | -   | 48   | 1    | --- K.LTPAQLQFMRQVQLAQWQK.T + Oxidation (M) |

**No match to:** 854.3130, 1046.5487, 1088.5551, 1093.5404, 1115.5872, 1284.7435, 1295.6729, 1296.6617, 1423.7716, 1444.7188, 1495.7935, 1513.8696, 1557.9111, 1587.8070, 1641.7796, 1674.8641, 1704.8557, 1723.5763, 1734.8304, 2003.0019, 2200.9913, 2301.0261, 2691.3014,



2748.3381

4. SPIN1\_MOUSE Mass: 29738 Score: 33 Expect: 7.8 Matches: 6

Spindlin-1 OS=Mus musculus GN=Spin1 PE=1 SV=2

**Observed Mr(expt) Mr(calc) ppm Start EndMiss Ions Peptide**

1088.5551 1087.5478 1087.5775 -27.28 3 - 12 1 --- K.TPFGKTPGQR.S  
1115.5872 1114.5799 1114.5407 35.2 64 - 73 0 --- R.EGNGPVTQWK.G  
1295.6729 1294.6656 1294.6041 47.5 217 - 227 1 --- K.QVEYAKEDGSK.R + Acetyl (N-term)  
1495.7935 1494.7862 1494.7626 15.7 52 - 63 1 --- R.NIVGCRIQHGWR.E  
1674.8641 1673.8568 1673.8961 -23.49 36 - 50 1 --- K.HRTSVGSPKPVSQPR.R + Acetyl (N-term)  
1734.8304 1733.8232 1733.7607 36.0 91 - 104 0 --- K.YDGFDCVYGLELNK.D + Acetyl (N-term)

**No match to:** 854.3130, 1046.5487, 1081.5468, 1093.5404, 1254.5991, 1284.7435, 1296.6617, 1423.7716, 1444.7188, 1513.8696, 1542.7860, 1557.9111, 1587.8070, 1641.7796, 1704.8557, 1723.5763, 2003.0019, 2200.9913, 2301.0261, 2330.1460, 2691.3014, 2748.3381

5. GEM5\_MOUSE Mass: 169080 Score: 33 Expect: 8.2 Matches: 10

Gem-associated protein 5 OS=Mus musculus GN=Gemin5 PE=1 SV=1

**Observed Mr(expt) Mr(calc) ppm Start EndMiss Ions Peptide**

1093.5404 1092.5331 1092.5240 8.34 672 - 679 0 --- R.EEPLFNFR.G + Acetyl (N-term)  
1115.5872 1114.5799 1114.6095 -26.48 525 - 533 1 --- K.LVRDTNSIR.Y + Acetyl (N-term)  
1295.6729 1294.6656 1294.6153 38.8 1408 - 1419 0 --- R.APSQPPSPTEER.N  
1495.7935 1494.7862 1494.7388 31.7 1260 - 1273 1 --- R.DKLGDLSPAMAAYK.S + Oxidation (M)  
1513.8696 1512.8623 1512.8048 38.0 999 - 1011 1 --- K.SNHLYREAIAVAK.A + Acetyl (N-term)  
1542.7860 1541.7787 1541.8242 -29.49 534 - 545 1 --- R.YKLPVHTEISWK.G + Acetyl (N-term)  
1587.8070 1586.7997 1586.8086 -5.64 845 - 858 1 --- R.SMLPLSTSLDHRSK.E + Oxidation (M)  
1641.7796 1640.7723 1640.8304 -35.39 843 - 856 1 --- K.ARSMPLSTSLDHR.S + Acetyl (N-term); Oxidation (M)  
2200.9913 2199.9841 2200.0888 -47.59 911 - 928 0 --- K.GHLESGHPELFHQLMLWK.G + Acetyl (N-term)  
2748.3381 2747.3308 2747.4565 -45.77 1062 - 1089 1 --- K.GDAASLRTAAELAAIAGEHELAASLALR.C

**No match to:** 854.3130, 1046.5487, 1081.5468, 1088.5551, 1254.5991, 1284.7435, 1296.6617, 1423.7716, 1444.7188, 1557.9111, 1674.8641, 1704.8557, 1723.5763, 1734.8304, 2003.0019, 2301.0261, 2330.1460, 2691.3014

6. HBAZ\_MOUSE Mass: 16338 Score: 32 Expect: 10 Matches: 4

Hemoglobin subunit zeta OS=Mus musculus GN=Hbz PE=2 SV=2

**Observed Mr(expt) Mr(calc) ppm Start EndMiss Ions Peptide**

1046.5487 1045.5414 1045.5478 -6.08 63 - 72 0 --- K.IMTAVGDAVK.S + Acetyl (N-term)  
1542.7860 1541.7787 1541.8058 -17.55 101 - 113 0 --- K.LLSHCLLVMAAR.F + Acetyl (N-term); Oxidation (M)  
1674.8641 1673.8568 1673.7930 38.1 18 - 32 0 --- K.MAAQAEPIGTETLER.L + Acetyl (N-term); Oxidation (M)  
2748.3381 2747.3308 2747.3332 -0.87 9 - 32 1 --- R.AIIMSMWEKMAAQAEPIGTETLER.L + Acetyl (N-term)

**No match to:** 854.3130, 1081.5468, 1088.5551, 1093.5404, 1115.5872, 1254.5991, 1284.7435, 1295.6729, 1296.6617, 1423.7716, 1444.7188, 1495.7935, 1513.8696, 1557.9111, 1587.8070, 1641.7796, 1704.8557, 1723.5763, 1734.8304, 2003.0019, 2200.9913, 2301.0261, 2330.1460, 2691.3014

7. MBL1\_MOUSE Mass: 25836 Score: 30 Expect: 17 Matches: 6

Mannose-binding protein A OS=Mus musculus GN=Mbl1 PE=2 SV=1

**Observed Mr(expt) Mr(calc) ppm Start End Miss Ions Peptide**

1046.5487 1045.5414 1045.5226 18.0 96 - 104 0 -- K.LANMEAEIR.I  
 1081.5468 1080.5395 1080.5604 -19.30 194 - 201 1 -- R\_LTYSNWKK.D + Acetyl (N-term)  
 1088.5551 1087.5478 1087.5331 13.5 96 - 104 0 -- K\_LANMEAEIR.I + Acetyl (N-term)  
 1115.5872 1114.5799 1114.6135 -30.09 128 - 136 1 -- K.KLFVTNHEK.M  
 1587.8070 1586.7997 1586.8603 -38.18 110 - 123 1 -- K.LQLTNKLFHAFSMGK.K  
 1674.8641 1673.8568 1673.8294 16.4 91 - 104 1 -- R\_AIEEKLANMEAEIR.I + Acetyl (N-term); Oxidation (M)  
**No match to:** 854.3130, 1093.5404, 1254.5991, 1284.7435, 1295.6729, 1296.6617, 1423.7716, 1444.7188, 1495.7935, 1513.8696, 1542.7860, 1557.9111, 1641.7796, 1704.8557, 1723.5763, 1734.8304, 2003.0019, 2200.9913, 2301.0261, 2330.1460, 2691.3014, 2748.3381

**8. KRT36\_MOUSE Mass: 54011 Score: 29 Expect: 20 Matches: 5**

Keratin, type I cuticular Ha6 OS=Mus musculus GN=Krt36 PE=1 SV=1

**Observed Mr(expt) Mr(calc) ppm Start End Miss Ions Peptide**

1081.5468 1080.5395 1080.5451 -5.18 386 - 394 0 -- R.LESEIATYR.R  
 2003.0019 2001.9946 2002.0265 -15.95 314 - 330 1 -- R.RTVNSLEIELQAQSMR.N  
 2200.9913 2199.9841 2200.0582 -33.72 367 - 383 1 -- R\_CDLERQNHAYQVLLDVK.A + Acetyl (N-term)  
 2330.1460 2329.1388 2329.2086 -30.00 202 - 221 1 -- R\_ILDELTLCADLEAQVESLK.E + Acetyl (N-term)  
 2691.3014 2690.2941 2690.2429 19.1 2 - 27 1 -- M\_ATQICTPTFSAGSAKGLCGTSGSFSR.I + Acetyl (N-term)  
**No match to:** 854.3130, 1046.5487, 1088.5551, 1093.5404, 1115.5872, 1254.5991, 1284.7435, 1295.6729, 1296.6617, 1423.7716, 1444.7188, 1495.7935, 1513.8696, 1542.7860, 1557.9111, 1587.8070, 1641.7796, 1674.8641, 1704.8557, 1723.5763, 1734.8304, 2301.0261, 2748.3381

**9. ANXA2\_MOUSE Mass: 38937 Score: 29 Expect: 22 Matches: 6**

Annexin A2 OS=Mus musculus GN=Anxa2 PE=1 SV=2

**Observed Mr(expt) Mr(calc) ppm Start End Miss Ions Peptide**

1093.5404 1092.5331 1092.5274 5.25 213 - 220 0 -- K\_WISIMTER.S + Acetyl (N-term); Oxidation (M)  
 1115.5872 1114.5799 1114.5870 -6.31 38 - 47 0 -- R\_DALNIETAVK.T + Acetyl (N-term)  
 1423.7716 1422.7643 1422.7211 30.4 291 - 302 1 -- R.IMVSRSEVDMLK.I + Oxidation (M)  
 1444.7188 1443.7116 1443.7293 -12.26 221 - 231 1 -- R\_SVCHLQKVFYR.Y + Acetyl (N-term)  
 1542.7860 1541.7787 1541.8413 -40.60 50 - 63 0 -- K.GVDEVTIVNLTNR.S  
 1674.8641 1673.8568 1673.8447 7.26 207 - 220 1 -- K\_GTDVDPKWISIMTER.S + Acetyl (N-term)  
**No match to:** 854.3130, 1046.5487, 1081.5468, 1088.5551, 1254.5991, 1284.7435, 1295.6729, 1296.6617, 1495.7935, 1513.8696, 1557.9111, 1587.8070, 1641.7796, 1704.8557, 1723.5763, 1734.8304, 2003.0019, 2200.9913, 2301.0261, 2330.1460, 2691.3014, 2748.3381

**10. MEP1B\_MOUSE Mass: 80467 Score: 28 Expect: 24 Matches: 6**

Mep1b subunit beta OS=Mus musculus GN=Mep1b PE=1 SV=1

**Observed Mr(expt) Mr(calc) ppm Start End Miss Ions Peptide**

1081.5468 1080.5395 1080.5676 -25.98 63 - 71 1 -- K\_NSIIGDHKR.W + Acetyl (N-term)  
 1284.7435 1283.7362 1283.6874 38.0 555 - 566 0 -- R.GIGYGTTFVIFR.E  
 1495.7935 1494.7862 1494.7790 4.79 57 - 70 1 -- K.LEANGKNSIIGDHKR  
 2200.9913 2199.9841 2200.0510 -30.43 72 - 89 0 -- R\_WPHITIPYVLEDSLEMNAK.G + Acetyl (N-term); Oxidation (M)  
 2691.3014 2690.2941 2690.2105 31.1 308 - 331 0 -- K.DSGFFMHFNTSILNEGATAMLESRL + Oxidation (M)  
 2748.3381 2747.3308 2747.3681 -13.57 148 - 170 1 -- R.IATVQHEFLHALGFWHEQSRADR.D  
**No match to:** 854.3130, 1046.5487, 1088.5551, 1093.5404, 1115.5872, 1254.5991, 1295.6729, 1296.6617, 1423.7716, 1444.7188, 1513.8696,

1542.7860, 1557.9111, 1587.8070, 1641.7796, 1674.8641, 1704.8557, 1723.5763, 1734.8304, 2003.0019, 2301.0261, 2330.1460

#### Search Parameters

Type of search : MS/MS Ion Search  
Enzyme : Trypsin  
Fixed modifications : Carbamidomethyl (C)  
Variable modifications : Acetyl (N-term), Oxidation (M)  
Mass values : Monoisotopic  
Protein Mass : Unrestricted  
Peptide Mass Tolerance :  $\pm 50$  ppm  
Fragment Mass Tolerance:  $\pm 0.5$  Da  
Max Missed Cleavages : 1  
Instrument type : MALDI-TOF-TOF  
Query1 (854.3130,1+) : <no title>  
Query2 (1046.5487,1+) : <no title>  
Query3 (1081.5468,1+) : <no title>  
Query4 (1088.5551,1+) : <no title>  
Query5 (1093.5404,1+) : <no title>  
Query6 (1115.5872,1+) : <no title>  
Query7 (1254.5991,1+) : <no title>  
Query8 (1284.7435,1+) : <no title>  
Query9 (1295.6729,1+) : <no title>  
Query10 (1296.6617,1+) : <no title>  
Query11 (1423.7716,1+) : <no title>  
Query12 (1444.7188,1+) : <no title>  
Query13 (1495.7935,1+) : <no title>  
Query14 (1513.8696,1+) : <no title>  
Query15 (1542.7860,1+) : <no title>  
Query16 (1557.9111,1+) : <no title>  
Query17 (1587.8070,1+) : <no title>  
Query18 (1641.7796,1+) : <no title>  
Query19 (1674.8641,1+) : <no title>  
Query20 (1704.8557,1+) : <no title>  
Query21 (1723.5763,1+) : <no title>  
Query22 (1734.8304,1+) : <no title>  
Query23 (2003.0019,1+) : <no title>  
Query24 (2200.9913,1+) : <no title>  
Query25 (2301.0261,1+) : <no title>  
Query26 (2330.1460,1+) : <no title>  
Query27 (2691.3014,1+) : <no title>  
Query28 (2748.3381,1+) : <no title>

Mascot: <http://www.matrixscience.com/>



# **MASCOT** Mascot Search Results

**User** :  
**Email** :  
**Search title** : Auto submitted by BioTools  
**Database** : SwissProt 57.15 (515203 sequences; 181334896 residues)  
**Taxonomy** : Mus musculus (house mouse) (16230 sequences)  
**Timestamp** : 20 Jun 2013 at 07:31:12 GMT  
**Warning** : A Peptide summary report will usually give a much clearer picture of MS/MS search results.  
**Top Score** : 247 for PDIA1\_MOUSE, Protein disulfide-isomerase OS=Mus musculus GN=P4hb PE=1 SV=1

## Mascot Score Histogram

Protein score is  $-10 \cdot \log(P)$ , where P is the probability that the observed match is a random event.

Protein scores greater than 55 are significant ( $p < 0.05$ ).

Protein scores are derived from ions scores as a non-probabilistic basis for ranking protein hits.

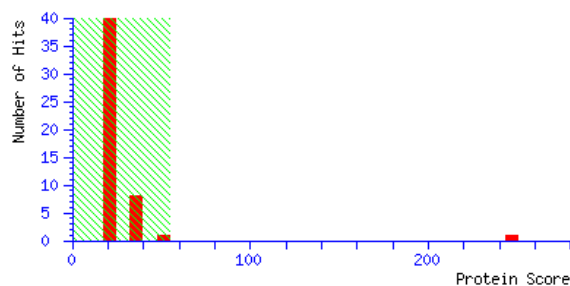

## Protein Summary Report

### Index

| Accession             | Mass  | Score | Description                                                                     |
|-----------------------|-------|-------|---------------------------------------------------------------------------------|
| <u>1. PDIA1_MOUSE</u> | 57507 | 247   | Protein disulfide-isomerase OS=Mus musculus GN=P4hb PE=1 SV=1                   |
| <u>2. KLC1_MOUSE</u>  | 61868 | 44    | Kinesin light chain 1 OS=Mus musculus GN=Klc1 PE=1 SV=3                         |
| <u>3. MSRA_MOUSE</u>  | 26200 | 37    | Peptide methionine sulfoxide reductase OS=Mus musculus GN=Msra PE=1 SV=1        |
| <u>4. TKN4_MOUSE</u>  | 14042 | 34    | Tachykinin-4 OS=Mus musculus GN=Tac4 PE=2 SV=1                                  |
| <u>5. TRFL_MOUSE</u>  | 79698 | 32    | Lactotransferrin OS=Mus musculus GN=Ltf PE=2 SV=3                               |
| <u>6. K2C4_MOUSE</u>  | 56590 | 31    | Keratin, type II cytoskeletal 4 OS=Mus musculus GN=Krt4 PE=1 SV=2               |
| <u>7. EVG1_MOUSE</u>  | 24950 | 30    | UPF0193 protein EVG1 homolog OS=Mus musculus PE=2 SV=1                          |
| <u>8. ANT3_MOUSE</u>  | 52484 | 29    | Antithrombin-III OS=Mus musculus GN=Serpinc1 PE=1 SV=1                          |
| <u>9. PTC2_MOUSE</u>  | 44443 | 29    | Pentatricopeptide repeat-containing protein 2 OS=Mus musculus GN=Ptc2 PE=2 SV=1 |
| <u>10. CMP_MOUSE</u>  | 84217 | 29    | C-Maf-inducing protein OS=Mus musculus GN=Cmip PE=2 SV=2                        |

## Results List

1. PDIA1\_MOUSE Mass: 57507 Score: 247 Expect: 3.2e-021 Matches: 8

Protein disulfide-isomerase OS=Mus musculus GN=P4hb PE=1 SV=1

| Observed  | Mr(expt)  | Mr(calc)  | ppm    | Start | End   | Miss | Ions | Peptide               |
|-----------|-----------|-----------|--------|-------|-------|------|------|-----------------------|
| 910.4453  | 909.4380  | 909.4345  | 3.87   | 447   | - 454 | 0    | ---  | K.FFPASADR.T          |
| 962.4547  | 961.4474  | 961.4440  | 3.55   | 341   | - 347 | 0    | ---  | K.ITEFCHR.F           |
| 988.5036  | 987.4963  | 987.4807  | 15.8   | 311   | - 318 | 1    | ---  | K.KEECPAVR.L          |
| 1002.5440 | 1001.5368 | 1001.5505 | -13.74 | 72    | - 80  | 1    | ---  | K.LKAEGSEIR.L         |
| 1780.8259 | 1779.8186 | 1779.8275 | -4.99  | 84    | - 99  | 0    | 116  | K.VDATEESDLAQQYGV.R   |
| 1794.8603 | 1793.8530 | 1793.9200 | -37.32 | 373   | - 388 | 1    | ---  | K.VLVGANFEEVAFDEKK.N  |
| 1833.9070 | 1832.8998 | 1832.9057 | -3.24  | 288   | - 302 | 0    | 85   | K.ILFIFIDSHTDNQR.I    |
| 1965.0339 | 1964.0266 | 1964.0367 | -5.16  | 233   | - 249 | 0    | ---  | K.HNQLPLVIEFTEQTAPK.I |

No match to: 849.4577, 898.5651, 904.4875, 995.6075, 1011.6115, 1013.5103, 1038.6180, 1050.6515, 1063.5526, 1067.4996, 1079.6272, 1081.6179, 1115.5621, 1123.6529, 1135.7007, 1137.6952, 1141.5987, 1148.7229, 1155.6580, 1192.7180, 1199.6618, 1205.7614, 1216.6582, 1219.6600, 1234.7284, 1265.7695, 1268.6940, 1319.7837, 1327.7302, 1359.7409, 1446.7783, 1508.8300, 1660.9003, 1663.9440, 1700.8843, 1861.9038, 1882.1205, 1933.9415, 1947.9824, 1987.0257, 1999.0176, 2140.1287

2. KLC1\_MOUSE Mass: 61868 Score: 44 Expect: 0.6 Matches: 7

Kinesin light chain 1 OS=Mus musculus GN=Klc1 PE=1 SV=3

| Observed  | Mr(expt)  | Mr(calc)  | ppm    | Start | End   | Miss | Ions | Peptide                |
|-----------|-----------|-----------|--------|-------|-------|------|------|------------------------|
| 910.4453  | 909.4380  | 909.4668  | -31.71 | 495   | - 502 | 0    | ---  | K.QGLDNVHK.Q           |
| 1002.5440 | 1001.5368 | 1001.4964 | 40.3   | 313   | - 320 | 1    | ---  | K.EAEPLCKR.A           |
| 1038.6180 | 1037.6108 | 1037.5618 | 47.2   | 494   | - 502 | 1    | ---  | R.KQGLDNVHK.Q          |
| 1327.7302 | 1326.7229 | 1326.7871 | -48.34 | 28    | - 39  | 1    | ---  | K.TKQVIQGLEALK.N       |
| 1660.9003 | 1659.8930 | 1659.8944 | -0.83  | 269   | - 283 | 1    | ---  | K.YKDAANLLNDALAIR.E    |
| 1780.8259 | 1779.8186 | 1779.8461 | -15.43 | 476   | - 491 | 1    | 15   | R.QGKFEAAETLEEAAMR.S   |
| 2140.1287 | 2139.1215 | 2139.1357 | -6.68  | 40    | - 57  | 1    | ---  | K.NEHSILQSLLLETLKCLK.K |

No match to: 849.4577, 898.5651, 904.4875, 962.4547, 988.5036, 995.6075, 1011.6115, 1013.5103, 1050.6515, 1063.5526, 1067.4996, 1079.6272, 1081.6179, 1115.5621, 1123.6529, 1135.7007, 1137.6952, 1141.5987, 1148.7229, 1155.6580, 1192.7180, 1199.6618, 1205.7614, 1216.6582, 1219.6600, 1234.7284, 1265.7695, 1268.6940, 1319.7837, 1359.7409, 1446.7783, 1508.8300, 1663.9440, 1700.8843, 1794.8603, 1833.9070, 1861.9038, 1882.1205, 1933.9415, 1947.9824, 1965.0339, 1987.0257, 1999.0176

3. MSRA\_MOUSE Mass: 26200 Score: 37 Expect: 3.4 Matches: 5

Peptide methionine sulfoxide reductase OS=Mus musculus GN=Msra PE=1 SV=1

| Observed  | Mr(expt)  | Mr(calc)  | ppm    | Start | End   | Miss | Ions | Peptide                               |
|-----------|-----------|-----------|--------|-------|-------|------|------|---------------------------------------|
| 1123.6529 | 1122.6456 | 1122.5921 | 47.7   | 175   | - 183 | 1    | ---  | K.EEYQKVLK.H                          |
| 1141.5987 | 1140.5914 | 1140.6139 | -19.69 | 28    | - 38  | 0    | ---  | K.VISAEALPGR.T                        |
| 1268.6940 | 1267.6867 | 1267.7248 | -30.03 | 8     | - 19  | 0    | ---  | R.ALQLSSANPVR.R                       |
| 1833.9070 | 1832.8998 | 1832.8938 | 3.26   | 21    | - 38  | 1    | ---  | R.MGDSASKVISAEALPGR.T + Oxidation (M) |
| 2140.1287 | 2139.1215 | 2139.0498 | 33.5   | 85    | - 104 | 1    | ---  | K.GVYSTQVGFAGGHTRNPTYK.E              |

No match to: 849.4577, 898.5651, 904.4875, 910.4453, 962.4547, 988.5036, 995.6075, 1002.5440, 1011.6115, 1013.5103, 1038.6180, 1050.6515, 1063.5526, 1067.4996, 1079.6272, 1081.6179, 1115.5621, 1135.7007, 1137.6952, 1148.7229, 1155.6580, 1192.7180, 1199.6618, 1205.7614, 1216.6582, 1219.6600, 1234.7284, 1265.7695, 1319.7837, 1327.7302, 1359.7409, 1446.7783, 1508.8300, 1660.9003, 1663.9440, 1700.8843, 1780.8259, 1794.8603, 1861.9038, 1882.1205, 1933.9415, 1947.9824, 1965.0339, 1987.0257, 1999.0176

4. TKN4\_MOUSE Mass: 14042 Score: 34 Expect: 5.9 Matches: 4

Tachykinin-4 OS=Mus musculus GN=Tac4 PE=2 SV=1

**Observed Mr(expt) Mr(calc) ppm Start End Miss Ions Peptide**

849.4577 848.4504 848.4505 -0.02 70 - 77 0 --- R.VGGYQLGR.I  
1115.5621 1114.5549 1114.5593 -4.03 61 - 69 1 --- R.QFYGLMGKR.V + Oxidation (M)  
1216.6582 1215.6509 1215.6070 36.1 59 - 68 1 --- R.TRQFYGLMGK.R + Oxidation (M)  
1663.9440 1662.9367 1662.9920 -33.22 41 - 55 1 --- K.GIPVPSIELKLQELK.R

**No match to:** 898.5651, 904.4875, 910.4453, 962.4547, 988.5036, 995.6075, 1002.5440, 1011.6115, 1013.5103, 1038.6180, 1050.6515, 1063.5526, 1067.4996, 1079.6272, 1081.6179, 1123.6529, 1135.7007, 1137.6952, 1141.5987, 1148.7229, 1155.6580, 1192.7180, 1199.6618, 1205.7614, 1219.6600, 1234.7284, 1265.7695, 1268.6940, 1319.7837, 1327.7302, 1359.7409, 1446.7783, 1508.8300, 1660.9003, 1700.8843, 1780.8259, 1794.8603, 1833.9070, 1861.9038, 1882.1205, 1933.9415, 1947.9824, 1965.0339, 1987.0257, 1999.0176, 2140.1287

5. TRFL\_MOUSE Mass: 79698 Score: 32 Expect: 11 Matches: 7

Lactotransferrin OS=Mus musculus GN=LtfPE=2 SV=3

**Observed Mr(expt) Mr(calc) ppm Start End Miss Ions Peptide**

1013.5103 1012.5031 1012.5376 -34.08 47 - 56 0 --- K.VGGPPLSCVK.K  
1115.5621 1114.5549 1114.6095 -48.99 353 - 362 1 --- K.QQDVIASKAR.V  
1141.5987 1140.5914 1140.6325 -36.06 47 - 57 1 --- K.VGGPPLSCVKK.S  
1327.7302 1326.7229 1326.6966 19.9 423 - 434 0 --- K.CGLVPVLAENQK.S  
1660.9003 1659.8930 1659.8733 11.9 104 - 117 1 --- K.EQPRTHYYAVAVVK.N  
1780.8259 1779.8186 1779.8825 -35.88 654 - 668 1 --- K.TKNLLFNDNTECLAQ.I  
1999.0176 1998.0103 1998.0898 -39.81 622 - 638 0 --- K.VEVLQQVLLDQQVQFGR.N

**No match to:** 849.4577, 898.5651, 904.4875, 910.4453, 962.4547, 988.5036, 995.6075, 1002.5440, 1011.6115, 1038.6180, 1050.6515, 1063.5526, 1067.4996, 1079.6272, 1081.6179, 1123.6529, 1135.7007, 1137.6952, 1148.7229, 1155.6580, 1192.7180, 1199.6618, 1205.7614, 1216.6582, 1219.6600, 1234.7284, 1265.7695, 1268.6940, 1319.7837, 1359.7409, 1446.7783, 1508.8300, 1663.9440, 1700.8843, 1794.8603, 1833.9070, 1861.9038, 1882.1205, 1933.9415, 1947.9824, 1965.0339, 1987.0257, 2140.1287

6. K2C4\_MOUSE Mass: 56590 Score: 31 Expect: 14 Matches: 5

Keratin, type II cytoskeletal 4 OS=Mus musculus GN=Krt4 PE=1 SV=2

**Observed Mr(expt) Mr(calc) ppm Start End Miss Ions Peptide**

988.5036 987.4963 987.5138 -17.67 51 - 59 0 --- R.SLYNLGGHK.S  
1002.5440 1001.5368 1001.5393 -2.53 411 - 419 0 --- R.AELETALQK.A  
1063.5526 1062.5454 1062.5604 -14.15 1 - 9 1 8 -.MIARQSSVR.G + Oxidation (M)  
1327.7302 1326.7229 1326.7143 6.51 310 - 321 0 --- R.NLDLDGIIAEVR.A  
1508.8300 1507.8228 1507.7743 32.1 10 - 26 1 --- R.GASRGFSSGSAIAGGVK.R

**No match to:** 849.4577, 898.5651, 904.4875, 910.4453, 962.4547, 995.6075, 1011.6115, 1013.5103, 1038.6180, 1050.6515, 1067.4996, 1079.6272, 1081.6179, 1115.5621, 1123.6529, 1135.7007, 1137.6952, 1141.5987, 1148.7229, 1155.6580, 1192.7180, 1199.6618, 1205.7614, 1216.6582, 1219.6600, 1234.7284, 1265.7695, 1268.6940, 1319.7837, 1359.7409, 1446.7783, 1660.9003, 1663.9440, 1700.8843, 1780.8259, 1794.8603, 1833.9070, 1861.9038, 1882.1205, 1933.9415, 1947.9824, 1965.0339, 1987.0257, 1999.0176, 2140.1287

7. EVG1\_MOUSE Mass: 24950 Score: 30 Expect: 17 Matches: 5

UPF0193 protein EVG1 homolog OS=Mus musculus PE=2 SV=1

**Observed Mr(expt) Mr(calc) ppm Start End Miss Ions Peptide**

1063.5526 1062.5454 1062.4950 47.4 49 - 56 1 --- R.HIMDTMKR.G + 2 Oxidation (M)  
 1219.6600 1218.6527 1218.6204 26.5 2 - 12 1 --- M.ASQERVDSVTK.G  
 1234.7284 1233.7211 1233.6717 40.1 126 - 136 1 --- R.LQNIFATGKDK.E  
 1794.8603 1793.8530 1793.8553 -1.26 42 - 55 1 --- K.LTNFQQRHIMDTMKR + 2 Oxidation (M)  
 1987.0257 1986.0184 1985.9373 40.9 22 - 38 1 --- K.QAGYTPGTCELLRVMME + 2 Oxidation (M)

**No match to:** 849.4577, 898.5651, 904.4875, 910.4453, 962.4547, 988.5036, 995.6075, 1002.5440, 1011.6115, 1013.5103, 1038.6180, 1050.6515, 1067.4996, 1079.6272, 1081.6179, 1115.5621, 1123.6529, 1135.7007, 1137.6952, 1141.5987, 1148.7229, 1155.6580, 1192.7180, 1199.6618, 1205.7614, 1216.6582, 1265.7695, 1268.6940, 1319.7837, 1327.7302, 1359.7409, 1446.7783, 1508.8300, 1660.9003, 1663.9440, 1700.8843, 1780.8259, 1833.9070, 1861.9038, 1882.1205, 1933.9415, 1947.9824, 1965.0339, 1999.0176, 2140.1287

**8. ANT3\_MOUSE Mass: 52484 Score: 29 Expect: 20 Matches: 6**

Antithrombin-III OS=Mus musculus GN=Serpinc1 PE=1 SV=1

| Observed  | Mr(expt)  | Mr(calc)  | ppm    | Start | End | Miss | Ions | Peptide                     |
|-----------|-----------|-----------|--------|-------|-----|------|------|-----------------------------|
| 910.4453  | 909.4380  | 909.4630  | -27.48 | 134   | 140 | 0    | ---  | K.QLMEVFK.F + Oxidation (M) |
| 1199.6618 | 1198.6545 | 1198.5982 | 47.0   | 356   | 365 | 1    | ---  | R.FRTEDGFSLK.E              |
| 1359.7409 | 1358.7336 | 1358.7016 | 23.5   | 47    | 57  | 0    | ---  | R.DIPVNPLCIYR.S             |
| 1508.8300 | 1507.8228 | 1507.7631 | 39.6   | 170   | 183 | 1    | ---  | K.SSDLVSANRFLGDK.S          |
| 1700.8843 | 1699.8770 | 1699.8529 | 14.2   | 203   | 216 | 1    | ---  | K.LQPLDFKENPEQSR.V          |
| 1999.0176 | 1998.0103 | 1997.9919 | 9.23   | 210   | 226 | 1    | ---  | K.ENPEQSRVTINNWVANK.T       |

**No match to:** 849.4577, 898.5651, 904.4875, 962.4547, 988.5036, 995.6075, 1002.5440, 1011.6115, 1013.5103, 1038.6180, 1050.6515, 1063.5526, 1067.4996, 1079.6272, 1081.6179, 1115.5621, 1123.6529, 1135.7007, 1137.6952, 1141.5987, 1148.7229, 1155.6580, 1192.7180, 1205.7614, 1216.6582, 1219.6600, 1234.7284, 1265.7695, 1268.6940, 1319.7837, 1327.7302, 1446.7783, 1660.9003, 1663.9440, 1780.8259, 1794.8603, 1833.9070, 1861.9038, 1882.1205, 1933.9415, 1947.9824, 1965.0339, 1987.0257, 2140.1287

**9. PTCD2\_MOUSE Mass: 44443 Score: 29 Expect: 20 Matches: 6**

Pentatricopeptide repeat-containing protein 2 OS=Mus musculus GN=Ptcd2 PE=2 SV=1

| Observed  | Mr(expt)  | Mr(calc)  | ppm    | Start | End | Miss | Ions | Peptide                          |
|-----------|-----------|-----------|--------|-------|-----|------|------|----------------------------------|
| 1216.6582 | 1215.6509 | 1215.6459 | 4.16   | 72    | 81  | 1    | ---  | R.NLEEKLTQNK.L                   |
| 1219.6600 | 1218.6527 | 1218.6543 | -1.30  | 1     | 10  | 0    | ---  | -.MATVFRPLER.L                   |
| 1234.7284 | 1233.7211 | 1233.7081 | 10.6   | 38    | 47  | 1    | ---  | K.RYLLTDNIVK.L                   |
| 1319.7837 | 1318.7764 | 1318.7860 | -7.28  | 39    | 49  | 1    | ---  | R.YLLTDNIVKLE                    |
| 1446.7783 | 1445.7710 | 1445.7912 | -13.96 | 214   | 225 | 1    | ---  | K.ICTTLREEALIK.G                 |
| 1508.8300 | 1507.8228 | 1507.8068 | 10.6   | 174   | 185 | 1    | ---  | K.YERALQVLIEMK.N + Oxidation (M) |

**No match to:** 849.4577, 898.5651, 904.4875, 910.4453, 962.4547, 988.5036, 995.6075, 1002.5440, 1011.6115, 1013.5103, 1038.6180, 1050.6515, 1063.5526, 1067.4996, 1079.6272, 1081.6179, 1115.5621, 1123.6529, 1135.7007, 1137.6952, 1141.5987, 1148.7229, 1155.6580, 1192.7180, 1199.6618, 1205.7614, 1265.7695, 1268.6940, 1327.7302, 1359.7409, 1660.9003, 1663.9440, 1700.8843, 1780.8259, 1794.8603, 1833.9070, 1861.9038, 1882.1205, 1933.9415, 1947.9824, 1965.0339, 1987.0257, 1999.0176, 2140.1287

**10. CMIP\_MOUSE Mass: 84217 Score: 29 Expect: 21 Matches: 7**

C-MaF inducing protein OS=Mus musculus GN=Cmip PE=2 SV=2

| Observed  | Mr(expt)  | Mr(calc)  | ppm    | Start | End | Miss | Ions | Peptide                       |
|-----------|-----------|-----------|--------|-------|-----|------|------|-------------------------------|
| 962.4547  | 961.4474  | 961.4586  | -11.64 | 1     | 8   | 1    | ---  | -.MGAVPCRR.A + Oxidation (M)  |
| 1063.5526 | 1062.5454 | 1062.5314 | 13.1   | 9     | 17  | 0    | ---  | R.ALLLCNGMR.Y + Oxidation (M) |



1137.6952 1136.6879 1136.6805 6.53 36 - 45 1 --- R.TFLSKILTSK.F  
1219.6600 1218.6527 1218.6325 16.6 8 - 17 1 --- R.RALLCNGMR.Y + Oxidation (M)  
1327.7302 1326.7229 1326.6714 38.8 475 - 485 0 --- R.QEVHSCLLSVR.A  
1833.9070 1832.8998 1832.9818 -44.78 18 - 32 1 --- R.YKLLQEGDIQVCVIR.H  
1987.0257 1986.0184 1985.9465 36.2 272 - 288 1 --- K.KFIQSMHGPTGHCPHR.V

**No match to:** 849.4577, 898.5651, 904.4875, 910.4453, 988.5036, 995.6075, 1002.5440, 1011.6115, 1013.5103, 1038.6180, 1050.6515, 1067.4996, 1079.6272, 1081.6179, 1115.5621, 1123.6529, 1135.7007, 1141.5987, 1148.7229, 1155.6580, 1192.7180, 1199.6618, 1205.7614, 1216.6582, 1234.7284, 1265.7695, 1268.6940, 1319.7837, 1359.7409, 1446.7783, 1508.8300, 1660.9003, 1663.9440, 1700.8843, 1780.8259, 1794.8603, 1861.9038, 1882.1205, 1933.9415, 1947.9824, 1965.0339, 1999.0176, 2140.1287

#### Search Parameters

Type of search : MS/MS Ion Search  
Enzyme : Trypsin  
Fixed modifications : Carbamidomethyl (C)  
Variable modifications : Oxidation (M)  
Mass values : Monoisotopic  
Protein Mass : Unrestricted  
Peptide Mass Tolerance :  $\pm 50$  ppm  
Fragment Mass Tolerance:  $\pm 0.6$  Da  
Max Missed Cleavages : 1  
Instrument type : MALDI-TOF-TOF  
Query1 (849.4577,1+) : <no title>  
Query2 (898.5651,1+) : <no title>  
Query3 (904.4875,1+) : <no title>  
Query4 (910.4453,1+) : <no title>  
Query5 (962.4547,1+) : <no title>  
Query6 (988.5036,1+) : <no title>  
Query7 (995.6075,1+) : <no title>  
Query8 (1002.5440,1+) : <no title>  
Query9 (1011.6115,1+) : <no title>  
Query10 (1013.5103,1+) : <no title>  
Query11 (1038.6180,1+) : <no title>  
Query12 (1050.6515,1+) : <no title>  
Query13 (1063.5526,1+) : <no title>  
Query14 (1067.4996,1+) : <no title>  
Query15 (1079.6272,1+) : <no title>  
Query16 (1081.6179,1+) : <no title>  
Query17 (1115.5621,1+) : <no title>  
Query18 (1123.6529,1+) : <no title>  
Query19 (1135.7007,1+) : <no title>  
Query20 (1137.6952,1+) : <no title>  
Query21 (1141.5987,1+) : <no title>  
Query22 (1148.7229,1+) : <no title>  
Query23 (1155.6580,1+) : <no title>

Query24 (1192.7180,1+) : <no title>  
Query25 (1199.6618,1+) : <no title>  
Query26 (1205.7614,1+) : <no title>  
Query27 (1216.6582,1+) : <no title>  
Query28 (1219.6600,1+) : <no title>  
Query29 (1234.7284,1+) : <no title>  
Query30 (1265.7695,1+) : <no title>  
Query31 (1268.6940,1+) : <no title>  
Query32 (1319.7837,1+) : <no title>  
Query33 (1327.7302,1+) : <no title>  
Query34 (1359.7409,1+) : <no title>  
Query35 (1446.7783,1+) : <no title>  
Query36 (1508.8300,1+) : <no title>  
Query37 (1660.9003,1+) : <no title>  
Query38 (1663.9440,1+) : <no title>  
Query39 (1700.8843,1+) : <no title>  
Query40 (1780.8259,1+) : <no title>  
Query41 (1794.8603,1+) : <no title>  
Query42 (1833.9070,1+) : <no title>  
Query43 (1861.9038,1+) : <no title>  
Query44 (1882.1205,1+) : <no title>  
Query45 (1933.9415,1+) : <no title>  
Query46 (1947.9824,1+) : <no title>  
Query47 (1965.0339,1+) : <no title>  
Query48 (1987.0257,1+) : <no title>  
Query49 (1999.0176,1+) : <no title>  
Query50 (2140.1287,1+) : <no title>

**Mascot:** <http://www.matrixscience.com/>

# **MASCOT** Mascot Search Results

**User** :  
**Email** :  
**Search title** : Auto submitted by BioTools  
**Database** : SwissProt 57.15 (515203 sequences; 181334896 residues)  
**Taxonomy** : Mus. (16281 sequences)  
**Timestamp** : 20 May 2013 at 01:29:59 GMT  
**Warning** : A Peptide summary report will usually give a much clearer picture of MS/MS search results.  
**Top Score** : 147 for PTRF\_MOUSE, Polymerase I and transcript release factor OS=Mus musculus GN=Ptrf PE=1 SV=1

## Mascot Score Histogram

Protein score is  $-10 \cdot \log(P)$ , where P is the probability that the observed match is a random event.

Protein scores greater than 55 are significant ( $p < 0.05$ ).

Protein scores are derived from ions scores as a non-probabilistic basis for ranking protein hits.

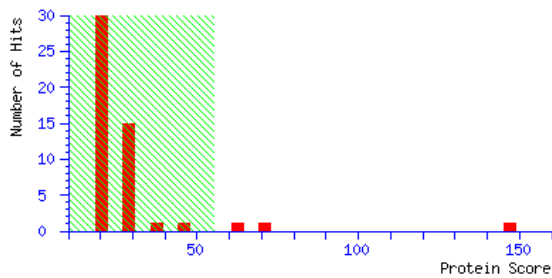

## Protein Summary Report

### Index

| Accession                       | Mass   | Score | Description                                                                                                               |
|---------------------------------|--------|-------|---------------------------------------------------------------------------------------------------------------------------|
| 1. <a href="#">PTRF_MOUSE</a>   | 43927  | 147   | Polymerase I and transcript release factor OS=Mus musculus GN=Ptrf PE=1 SV=1                                              |
| 2. <a href="#">AIAT3_MOUSE</a>  | 45966  | 70    | Alpha-1-antitrypsin 1-3 OS=Mus musculus GN=Serpinalc PE=1 SV=2                                                            |
| 3. <a href="#">AIAT1_MOUSE</a>  | 46145  | 62    | Alpha-1-antitrypsin 1-1 OS=Mus musculus GN=Serpinala PE=1 SV=4                                                            |
| 4. <a href="#">TFRI_MOUSE</a>   | 86076  | 49    | Transferrin receptor protein 1 OS=Mus musculus GN=Tfrc PE=1 SV=1                                                          |
| 5. <a href="#">GCNT7_MOUSE</a>  | 49291  | 38    | Beta-1,3-galactosyl-O-glycosyl-glycoprotein beta-1,6-N-acetylglucosaminyltransferase 7 OS=Mus musculus GN=Gcnt7 PE=2 SV=1 |
| 6. <a href="#">CAND2_MOUSE</a>  | 137086 | 33    | Cullin-associated NEDD8-dissociated protein 2 OS=Mus musculus GN=Cand2 PE=1 SV=2                                          |
| 7. <a href="#">SC6A3_MOUSE</a>  | 69502  | 30    | Sodium-dependent dopamine transporter OS=Mus musculus GN=Slc6a3 PE=1 SV=2                                                 |
| 8. <a href="#">PPM1L_MOUSE</a>  | 41251  | 29    | Protein phosphatase 1L OS=Mus musculus GN=Ppm1l PE=1 SV=1                                                                 |
| 9. <a href="#">AIAT2_MOUSE</a>  | 46117  | 29    | Alpha-1-antitrypsin 1-2 OS=Mus musculus GN=Serpinalb PE=1 SV=2                                                            |
| 10. <a href="#">DCST1_MOUSE</a> | 85646  | 28    | DC-STAMP domain-containing protein 1 OS=Mus musculus GN=Dcst1 PE=2 SV=1                                                   |

## Results List

1. PTRF\_MOUSE Mass: 43927 Score: 147 Expect: 3.2e-011 Matches: 7

Polymerase I and transcript release factor OS=Mus musculus GN=Ptrf PE=1 SV=1

| Observed  | Mr(expt)  | Mr(calc)  | ppm    | Start | End   | Miss | Ions | Peptide                |
|-----------|-----------|-----------|--------|-------|-------|------|------|------------------------|
| 1071.5989 | 1070.5916 | 1070.5913 | 0.30   | 320   | - 328 | 0    | ---  | K.VPPPTFHVK.K          |
| 1171.6428 | 1170.6355 | 1170.6608 | -21.59 | 330   | - 339 | 1    | ---  | K.IREGEVEVLK.A         |
| 1291.6387 | 1290.6315 | 1290.6357 | -3.27  | 302   | - 312 | 0    | 49   | K.SFTPDHVVYAR.S        |
| 1313.7321 | 1312.7248 | 1312.7350 | -7.75  | 139   | - 149 | 1    | 32   | K.KLEVNEALLR.R         |
| 1419.7260 | 1418.7187 | 1418.7307 | -8.44  | 301   | - 312 | 1    | ---  | R.KSFTPDHVVYAR.S       |
| 1932.8634 | 1931.8561 | 1931.8418 | 7.39   | 340   | - 357 | 0    | ---  | K.ATEMVEVGPEDEVAER.G   |
| 2025.1038 | 2024.0965 | 2024.0902 | 3.11   | 63    | - 80  | 0    | 15   | K.IIGAVDQIQLTQAQLEER.Q |

No match to: 981.5416, 1088.5817, 1093.6234, 1338.8345, 1701.5426, 1723.5341, 1724.5839, 2021.0898, 2179.1374, 2405.1854

2. AIAT3\_MOUSE Mass: 45966 Score: 70 Expect: 0.0015 Matches: 4

Alpha-1-antitrypsin 1-3 OS=Mus musculus GN=Serpina1c PE=1 SV=2

| Observed  | Mr(expt)  | Mr(calc)  | ppm    | Start | End   | Miss | Ions | Peptide                                   |
|-----------|-----------|-----------|--------|-------|-------|------|------|-------------------------------------------|
| 981.5416  | 980.5344  | 980.5556  | -21.63 | 301   | - 308 | 0    | 44   | R.LAQIHFPRL                               |
| 1088.5817 | 1087.5744 | 1087.6060 | -28.99 | 319   | - 328 | 0    | ---  | K.TLMSPLGITR.I                            |
| 1171.6428 | 1170.6355 | 1170.6608 | -21.60 | 182   | - 192 | 1    | ---  | <u>K</u> .GTQGKIVEAVK.K + Acetyl (N-term) |
| 2405.1854 | 2404.1781 | 2404.1659 | 5.09   | 36    | - 57  | 0    | ---  | K.DQSPASHEIATNLGDF AISLYR.E               |

No match to: 1071.5989, 1093.6234, 1291.6387, 1313.7321, 1338.8345, 1419.7260, 1701.5426, 1723.5341, 1724.5839, 1932.8634, 2021.0898, 2025.1038, 2179.1374

3. AIAT1\_MOUSE Mass: 46145 Score: 62 Expect: 0.011 Matches: 3

Alpha-1-antitrypsin 1-1 OS=Mus musculus GN=Serpina1a PE=1 SV=4

| Observed  | Mr(expt)  | Mr(calc)  | ppm    | Start | End   | Miss | Ions | Peptide                     |
|-----------|-----------|-----------|--------|-------|-------|------|------|-----------------------------|
| 981.5416  | 980.5344  | 980.5556  | -21.63 | 301   | - 308 | 0    | 44   | R.LAQIHFPRL                 |
| 1088.5817 | 1087.5744 | 1087.6060 | -28.99 | 319   | - 328 | 0    | ---  | K.TLMSPLGITR.I              |
| 2405.1854 | 2404.1781 | 2404.1659 | 5.09   | 36    | - 57  | 0    | ---  | K.DQSPASHEIATNLGDF AISLYR.E |

No match to: 1071.5989, 1093.6234, 1171.6428, 1291.6387, 1313.7321, 1338.8345, 1419.7260, 1701.5426, 1723.5341, 1724.5839, 1932.8634, 2021.0898, 2025.1038, 2179.1374

4. TFR1\_MOUSE Mass: 86076 Score: 49 Expect: 0.2 Matches: 6

Transferrin receptor protein 1 OS=Mus musculus GN=Tfrc PE=1 SV=1

| Observed  | Mr(expt)  | Mr(calc)  | ppm    | Start | End   | Miss | Ions | Peptide                                                              |
|-----------|-----------|-----------|--------|-------|-------|------|------|----------------------------------------------------------------------|
| 981.5416  | 980.5344  | 980.4862  | 49.1   | 669   | - 675 | 1    | ---  | <u>K</u> .TNR FVMR.E + Acetyl (N-term); Oxidation (M)                |
| 1171.6428 | 1170.6355 | 1170.6145 | 17.9   | 518   | - 527 | 1    | ---  | K.HPVDGKSLYR.D                                                       |
| 1291.6387 | 1290.6315 | 1290.6568 | -19.62 | 627   | - 636 | 1    | ---  | <u>K</u> .DLNQFKTDIR.D + Acetyl (N-term)                             |
| 1932.8634 | 1931.8561 | 1931.9160 | -30.97 | 23    | - 39  | 1    | ---  | R.FSLARQVDGDN SHVEMK.L                                               |
| 2025.1038 | 2024.0965 | 2024.0149 | 40.3   | 633   | - 649 | 1    | 14   | K.TDIRDMGLSLQWLYSAR.G                                                |
| 2405.1854 | 2404.1781 | 2404.1117 | 27.6   | 2     | - 22  | 1    | ---  | <u>M</u> .MDQARS AFSNLFGGEP LSYTR.F + Acetyl (N-term); Oxidation (M) |

No match to: 1071.5989, 1088.5817, 1093.6234, 1313.7321, 1338.8345, 1419.7260, 1701.5426, 1723.5341, 1724.5839, 2021.0898, 2179.1374

5. GCNT7\_MOUSE Mass: 49291 Score: 38 Expect: 2.4 Matches: 5

Beta-1,3-galactosyl-O-glycosyl-glycoprotein beta-1,6-N-acetylglucosaminyltransferase 7 OS=Mus musculus GN=Gcnt7 PE=2 SV=1

**Observed Mr(expt) Mr(calc) ppm Start EndMiss Ions Peptide**

1088.5817 1087.5744 1087.5563 16.7 318 - 325 0 -- K.HYWVTLNR.L  
1291.6387 1290.6315 1290.6172 11.0 184 - 193 1 -- R.RLQAEIDCMR.D  
1932.8634 1931.8561 1931.9490 -48.05 326 - 343 1 -- R\_LKDAPGATPDAGWEGHIR.A + Acetyl (N-term)  
2179.1374 2178.1301 2178.0818 22.2 271 - 290 0 -- K\_QSPPHNLTISSGSAHYALTR.K + Acetyl (N-term)  
2405.1854 2404.1781 2404.2469 -28.62 6 - 26 1 -- R.TTKAGLVACGMICAFIFLYLR.N

**No match to:** 981.5416, 1071.5989, 1093.6234, 1171.6428, 1313.7321, 1338.8345, 1419.7260, 1701.5426, 1723.5341, 1724.5839, 2021.0898, 2025.1038

**6. CAND2\_MOUSE Mass: 137086 Score: 33 Expect: 8.2 Matches: 7**

Cullin-associated NEDD8-dissociated protein 2 OS=Mus musculus GN=Cand2 PE=1 SV=2

**Observed Mr(expt) Mr(calc) ppm Start EndMiss Ions Peptide**

1088.5817 1087.5744 1087.5873 -11.85 1163 - 1172 1 -- K.AGSVKQELEK.Q  
1171.6428 1170.6355 1170.6794 -37.50 632 - 642 0 -- K.ALTLVAMSPLR.L  
1291.6387 1290.6315 1290.6568 -19.63 1196 - 1207 0 -- K.SPTVADFSAQIR.S  
1419.7260 1418.7187 1418.7518 -23.32 1195 - 1207 1 -- R.KSPTVADFSAQIR.S  
1932.8634 1931.8561 1931.8829 -13.87 806 - 824 0 -- R\_CVAALSAACPQEAAGTASR.L + Acetyl (N-term)  
2021.0898 2020.0826 2019.9823 49.6 559 - 576 0 -- R\_LLDPEPYVGEMSTATLAR.L + Acetyl (N-term); Oxidation (M)  
2025.1038 2024.0965 2024.0976 -0.54 605 - 621 1 -- R\_LGDDLEPTLMLLDRLR.N + Acetyl (N-term)

**No match to:** 981.5416, 1071.5989, 1093.6234, 1313.7321, 1338.8345, 1701.5426, 1723.5341, 1724.5839, 2179.1374, 2405.1854

**7. SC6A3\_MOUSE Mass: 69502 Score: 30 Expect: 16 Matches: 4**

Sodium-dependent dopamine transporter OS=Mus musculus GN=Slc6a3 PE=1 SV=2

**Observed Mr(expt) Mr(calc) ppm Start EndMiss Ions Peptide**

981.5416 980.5344 980.4927 42.5 228 - 236 0 11 R\_GIDDLGPPR.W + Acetyl (N-term)  
1071.5989 1070.5916 1070.5833 7.84 601 - 609 1 -- R.QLVDRGEVR.Q  
1088.5817 1087.5744 1087.5887 -13.09 219 - 227 0 -- R\_GVLHLHQS.R.G + Acetyl (N-term)  
2179.1374 2178.1301 2178.0615 31.5 509 - 524 1 -- K\_QMTGQRPNLYWRLCWK.L + Acetyl (N-term)

**No match to:** 1093.6234, 1171.6428, 1291.6387, 1313.7321, 1338.8345, 1419.7260, 1701.5426, 1723.5341, 1724.5839, 1932.8634, 2021.0898, 2025.1038, 2405.1854

**8. PPM1L\_MOUSE Mass: 41251 Score: 29 Expect: 20 Matches: 4**

Protein phosphatase 1L OS=Mus musculus GN=Ppm1l PE=1 SV=1

**Observed Mr(expt) Mr(calc) ppm Start EndMiss Ions Peptide**

1419.7260 1418.7187 1418.7293 -7.48 72 - 84 0 -- R\_LGGLDVLEAEFSK.T + Acetyl (N-term)  
1932.8634 1931.8561 1931.9047 -25.15 103 - 118 1 -- R.DHMEDRFEVLTDLANK.T  
2025.1038 2024.0965 2024.0468 24.5 1 - 17 1 -- -.MIEDTMTLLSLLGRIMR.Y + 2 Oxidation (M)  
2405.1854 2404.1781 2404.2485 -29.29 159 - 178 0 -- K\_ENSVLTYQTILEQQILSIDR.E + Acetyl (N-term)

**No match to:** 981.5416, 1071.5989, 1088.5817, 1093.6234, 1171.6428, 1291.6387, 1313.7321, 1338.8345, 1701.5426, 1723.5341, 1724.5839, 2021.0898, 2179.1374

**9. AIAT2\_MOUSE Mass: 46117 Score: 29 Expect: 21 Matches: 4**

Alpha-1-antitrypsin 1-2 OS=Mus musculus GN=Serpinalb PE=1 SV=2

**Observed Mr(expt) Mr(calc) ppm Start End Miss Ions Peptide**

1088.5817 1087.5744 1087.6060 -28.99 319 - 328 0 --- K.TLMSPLGITR.I  
1171.6428 1170.6355 1170.6608 -21.60 182 - 192 1 --- K.GTQGKIVEAVK.E + Acetyl (N-term)  
2179.1374 2178.1301 2178.1718 -19.14 309 - 328 1 --- R.LSISGDYLNKTLMSPLGITR.I  
2405.1854 2404.1781 2404.1659 5.09 36 - 57 0 --- K.DQSPASHEIATNLGDF AISLYR.E

**No match to:** 981.5416, 1071.5989, 1093.6234, 1291.6387, 1313.7321, 1338.8345, 1419.7260, 1701.5426, 1723.5341, 1724.5839, 1932.8634, 2021.0898, 2025.1038

**10. DCST1\_MOUSE Mass: 85646 Score: 28 Expect: 24 Matches: 5**

DC-STAMP domain-containing protein 1 OS=Mus musculus GN=Dcst1 PE=2 SV=1

**Observed Mr(expt) Mr(calc) ppm Start End Miss Ions Peptide**

1291.6387 1290.6315 1290.6648 -25.85 617 - 626 0 --- R.ALFFYNEFLK.K  
1313.7321 1312.7248 1312.7714 -35.48 533 - 544 1 10 K.VEGDSILAKLLR.K  
1419.7260 1418.7187 1418.7598 -28.98 617 - 627 1 --- R.ALFFYNEFLKK.R  
2025.1038 2024.0965 2024.0522 21.9 298 - 313 1 --- R\_RIHLPLFNNMICVPMK.F + Acetyl (N-term)  
2179.1374 2178.1301 2178.1507 -9.43 1 - 19 1 --- \_MAFLSSTLHSLGIFEKISR.I + Acetyl (N-term)

**No match to:** 981.5416, 1071.5989, 1088.5817, 1093.6234, 1171.6428, 1338.8345, 1701.5426, 1723.5341, 1724.5839, 1932.8634, 2021.0898, 2405.1854

#### Search Parameters

Type of search : MS/MS Ion Search

Enzyme : Trypsin

Fixed modifications : Carbamidomethyl (C)

Variable modifications : Acetyl (N-term), Oxidation (M)

Mass values : Monoisotopic

Protein Mass : Unrestricted

Peptide Mass Tolerance :  $\pm 50$  ppm

Fragment Mass Tolerance:  $\pm 0.5$  Da

Max Missed Cleavages : 1

Instrument type : MALDI-TOF-TOF

Query1 (981.5416,1+) : <no title>

Query2 (1071.5989,1+) : <no title>

Query3 (1088.5817,1+) : <no title>

Query4 (1093.6234,1+) : <no title>

Query5 (1171.6428,1+) : <no title>

Query6 (1291.6387,1+) : <no title>

Query7 (1313.7321,1+) : <no title>

Query8 (1338.8345,1+) : <no title>

Query9 (1419.7260,1+) : <no title>

Query10 (1701.5426,1+) : <no title>

Query11 (1723.5341,1+) : <no title>

Query12 (1724.5839,1+) : <no title>

Query13 (1932.8634,1+) : <no title>

Query14 (2021.0898,1+) : <no title>

Query15 (2025.1038,1+) : <no title>

Query16 (2179.1374,1+) : <no title>

Query17 (2405.1854,1+) : <no title>

**Mascot:** <http://www.matrixscience.com/>

# **MASCOT** Mascot Search Results **SCIENCE**

**User** :  
**Email** :  
**Search title** : Auto submitted by BioTools  
**Database** : SwissProt 57.15 (515203 sequences; 181334896 residues)  
**Taxonomy** : Mus musculus (house mouse) (16230 sequences)  
**Timestamp** : 20 Jun 2013 at 07:31:03 GMT  
**Warning** : A Peptide summary report will usually give a much clearer picture of MS/MS search results.  
**Top Score** : 92 for RD23A\_MOUSE, UV excision repair protein RAD23 homolog A OS=Mus musculus GN=Rad23a PE=1 SV=1

## Mascot Score Histogram

Protein score is  $-10 \cdot \log(P)$ , where P is the probability that the observed match is a random event.

Protein scores greater than 55 are significant ( $p < 0.05$ ).

Protein scores are derived from ions scores as a non-probabilistic basis for ranking protein hits.

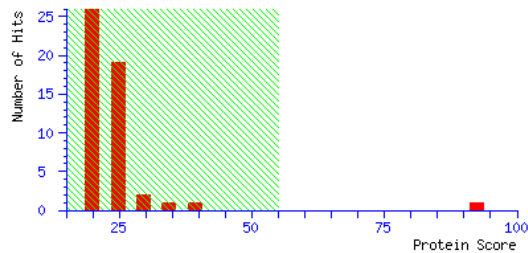

## Protein Summary Report

### Index

| Accession                      | Mass   | Score | Description                                                                                          |
|--------------------------------|--------|-------|------------------------------------------------------------------------------------------------------|
| 1. <a href="#">RD23A_MOUSE</a> | 39802  | 92    | UV excision repair protein RAD23 homolog A OS=Mus musculus GN=Rad23a PE=1 SV=1                       |
| 2. <a href="#">WDR38_MOUSE</a> | 33715  | 38    | WD repeat-containing protein 38 OS=Mus musculus GN=Wdr38 PE=2 SV=1                                   |
| 3. <a href="#">PPIA_MOUSE</a>  | 38257  | 35    | Serine/threonine-protein phosphatase PP1-alpha catalytic subunit OS=Mus musculus GN=Ppp1ca PE=1 SV=1 |
| 4. <a href="#">GLCTK_MOUSE</a> | 55543  | 30    | Glycerate kinase OS=Mus musculus GN=Glyctk PE=2 SV=1                                                 |
| 5. <a href="#">HYEP_MOUSE</a>  | 52713  | 28    | Epoxide hydrolase 1 OS=Mus musculus GN=Ephx1 PE=1 SV=1                                               |
| 6. <a href="#">SOS2_MOUSE</a>  | 154398 | 27    | Son of sevenless homolog 2 OS=Mus musculus GN=Sos2 PE=1 SV=2                                         |
| 7. <a href="#">HMCS2_MOUSE</a> | 57300  | 27    | Hydroxymethylglutaryl-CoA synthase, mitochondrial OS=Mus musculus GN=Hmgcs2 PE=1 SV=2                |
| 8. <a href="#">RAB5C_MOUSE</a> | 23626  | 26    | Ras-related protein Rab-5C OS=Mus musculus GN=Rab5c PE=1 SV=2                                        |
| 9. <a href="#">AP4S1_MOUSE</a> | 16978  | 26    | AP-4 complex subunit sigma-1 OS=Mus musculus GN=Ap4s1 PE=2 SV=1                                      |
| 10. <a href="#">BPI_MOUSE</a>  | 54191  | 26    | Bactericidal permeability-increasing protein OS=Mus musculus GN=Bpi PE=2 SV=1                        |

### Results List

1. [RD23A\\_MOUSE](#) Mass: 39802 Score: 92 Expect: 9.3e-006 Matches: 5



UV excision repair protein RAD23 homolog A OS=Mus musculus GN=Rad23a PE=1 SV=1

| Observed  | Mr(expt)  | Mr(calc)  | ppm   | Start | End   | Miss | Ions | Peptide                        |
|-----------|-----------|-----------|-------|-------|-------|------|------|--------------------------------|
| 958.4495  | 957.4422  | 957.4416  | 0.61  | 186   | - 193 | 0    | 6    | R.ASYNNPHR.A                   |
| 1145.6043 | 1144.5971 | 1144.5989 | -1.62 | 37    | - 47  | 1    | ---  | K.GRDAFPVAGQK.L                |
| 1163.5241 | 1162.5168 | 1162.5189 | -1.84 | 237   | - 245 | 0    | 39   | R.DQPQFQNMNR.Q                 |
| 1179.5331 | 1178.5259 | 1178.5139 | 10.2  | 237   | - 245 | 0    | ---  | R.DQPQFQNMNR.Q + Oxidation (M) |
| 1217.6272 | 1216.6199 | 1216.6122 | 6.41  | 17    | - 26  | 1    | ---  | K.IRMEPDETVK.V                 |

**No match to:** 1111.5682, 1115.5537, 1198.6607, 1913.9460, 2225.0629, 2248.0682

2. WDR38\_MOUSE Mass: 33715 Score: 38 Expect: 2.7 Matches: 4

WD repeat-containing protein 38 OS=Mus musculus GN=Wdr38 PE=2 SV=1

| Observed  | Mr(expt)  | Mr(calc)  | ppm    | Start | End   | Miss | Ions | Peptide                         |
|-----------|-----------|-----------|--------|-------|-------|------|------|---------------------------------|
| 1163.5241 | 1162.5168 | 1162.5263 | -8.18  | 1     | - 9   | 0    | ---  | -.MEWAPMNIR.A + Oxidation (M)   |
| 1179.5331 | 1178.5259 | 1178.5212 | 3.93   | 1     | - 9   | 0    | ---  | -.MEWAPMNIR.A + 2 Oxidation (M) |
| 1913.9460 | 1912.9387 | 1912.9683 | -15.46 | 236   | - 252 | 0    | ---  | K.GHTIWVNSLAFSPDELK.L           |
| 2225.0629 | 2224.0556 | 2224.0648 | -4.15  | 112   | - 132 | 1    | ---  | R.SVETVSFSPDSKQLASGGWDK.R       |

**No match to:** 958.4495, 1111.5682, 1115.5537, 1145.6043, 1198.6607, 1217.6272, 2248.0682

3. PP1A\_MOUSE Mass: 38257 Score: 35 Expect: 4.9 Matches: 3

Serine/threonine-protein phosphatase PP1-alpha catalytic subunit OS=Mus musculus GN=Ppp1ca PE=1 SV=1

| Observed  | Mr(expt)  | Mr(calc)  | ppm    | Start | End   | Miss | Ions | Peptide                 |
|-----------|-----------|-----------|--------|-------|-------|------|------|-------------------------|
| 1198.6607 | 1197.6534 | 1197.6182 | 29.4   | 114   | - 122 | 0    | ---  | R.YPENFFLLR.G           |
| 1913.9460 | 1912.9387 | 1912.9908 | -27.21 | 306   | - 323 | 0    | ---  | K.YGQFSGLNPGGRPITPPR.N  |
| 2248.0682 | 2247.0610 | 2247.0235 | 16.7   | 169   | - 187 | 0    | ---  | K.IFCCHGGLSPDLQSMEQIR.R |

**No match to:** 958.4495, 1111.5682, 1115.5537, 1145.6043, 1163.5241, 1179.5331, 1217.6272, 2225.0629

4. GLCTK\_MOUSE Mass: 55543 Score: 30 Expect: 16 Matches: 3

Glycerate kinase OS=Mus musculus GN=Glyctk PE=2 SV=1

| Observed  | Mr(expt)  | Mr(calc)  | ppm    | Start | End   | Miss | Ions | Peptide                       |
|-----------|-----------|-----------|--------|-------|-------|------|------|-------------------------------|
| 958.4495  | 957.4422  | 957.4702  | -29.18 | 118   | - 126 | 1    | ---  | R.AAMEHAGKK.E + Oxidation (M) |
| 1913.9460 | 1912.9387 | 1912.9829 | -23.10 | 40    | - 57  | 0    | ---  | R.QLFDSAVGAVQPGPMLQR.T        |
| 2248.0682 | 2247.0610 | 2247.1028 | -18.60 | 322   | - 342 | 0    | ---  | R.QAEVLGYHAMVLSTAMQGDVK.R     |

**No match to:** 1111.5682, 1115.5537, 1145.6043, 1163.5241, 1179.5331, 1198.6607, 1217.6272, 2225.0629

5. HYEP\_MOUSE Mass: 52713 Score: 28 Expect: 26 Matches: 3

Epoxide hydrolase 1 OS=Mus musculus GN=Ephx1 PE=1 SV=1

| Observed  | Mr(expt)  | Mr(calc)  | ppm    | Start | End   | Miss | Ions | Peptide                     |
|-----------|-----------|-----------|--------|-------|-------|------|------|-----------------------------|
| 958.4495  | 957.4422  | 957.4742  | -33.40 | 289   | - 295 | 0    | ---  | K.VFYNIMR.E + Oxidation (M) |
| 1145.6043 | 1144.5971 | 1144.5724 | 21.6   | 339   | - 348 | 1    | ---  | R.ELEDGGLERK.F              |
| 1217.6272 | 1216.6199 | 1216.6241 | -3.38  | 268   | - 277 | 1    | ---  | R.FGRFLGYTEK.D              |

**No match to:** 1111.5682, 1115.5537, 1163.5241, 1179.5331, 1198.6607, 1913.9460, 2225.0629, 2248.0682

6. SOS2\_MOUSE Mass: 154398 Score: 27 Expect: 32 Matches: 4

Son of sevenless homolog 2 OS=Mus musculus GN=Sos2 PE=1 SV=2

| Observed  | Mr(expt)  | Mr(calc)  | ppm    | Start | End   | Miss | Ions | Peptide              |
|-----------|-----------|-----------|--------|-------|-------|------|------|----------------------|
| 1111.5682 | 1110.5609 | 1110.5822 | -19.17 | 1314  | -1322 | 0    | --   | R.ELSHPLYRL          |
| 1179.5331 | 1178.5259 | 1178.5568 | -26.23 | 1169  | -1179 | 0    | --   | K.SDDPPAIPPR.Q       |
| 1913.9460 | 1912.9387 | 1912.9928 | -28.24 | 552   | -567  | 1    | --   | R.MLDSVLLKEENEQPLR.L |
| 2248.0682 | 2247.0610 | 2247.1373 | -33.97 | 341   | -357  | 0    | --   | R.LMLVPVYHCWHYFELK.Q |

**No match to:** 958.4495, 1115.5537, 1145.6043, 1163.5241, 1198.6607, 1217.6272, 2225.0629

7. HMCS2\_MOUSE Mass: 57300 Score: 27 Expect: 32 Matches: 3

Hydroxymethylglutaryl-CoA synthase, mitochondrial OS=Mus musculus GN=Hmgcs2 PE=1 SV=2

| Observed  | Mr(expt)  | Mr(calc)  | ppm    | Start | End  | Miss | Ions | Peptide                                  |
|-----------|-----------|-----------|--------|-------|------|------|------|------------------------------------------|
| 958.4495  | 957.4422  | 957.4450  | -2.93  | 495   | -501 | 1    | --   | R.VDEMHRK + Oxidation (M)                |
| 1217.6272 | 1216.6199 | 1216.6551 | -28.87 | 127   | -137 | 0    | --   | R.LEVGTETIDK.S                           |
| 2225.0629 | 2224.0556 | 2224.1382 | -37.15 | 16    | -35  | 1    | --   | K.RAMQETSLTPAHLLSAAQQR.F + Oxidation (M) |

**No match to:** 1111.5682, 1115.5537, 1145.6043, 1163.5241, 1179.5331, 1198.6607, 1913.9460, 2248.0682

8. RAB5C\_MOUSE Mass: 23626 Score: 26 Expect: 36 Matches: 2

Ras-related protein Rab-5C OS=Mus musculus GN=Rab5c PE=1 SV=2

| Observed  | Mr(expt)  | Mr(calc)  | ppm    | Start | End  | Miss | Ions | Peptide                   |
|-----------|-----------|-----------|--------|-------|------|------|------|---------------------------|
| 1913.9460 | 1912.9387 | 1912.9690 | -15.81 | 5     | -23  | 1    | --   | R.GGAARPNGPAAGNKICQFK.L   |
| 2225.0629 | 2224.0556 | 2224.1488 | -41.91 | 93    | -113 | 1    | --   | R.GAQAAIVVYDITNTDTFARAK.N |

**No match to:** 958.4495, 1111.5682, 1115.5537, 1145.6043, 1163.5241, 1179.5331, 1198.6607, 1217.6272, 2248.0682

9. AP4S1\_MOUSE Mass: 16978 Score: 26 Expect: 39 Matches: 2

AP-4 complex subunit sigma-1 OS=Mus musculus GN=Ap4s1 PE=2 SV=1

| Observed  | Mr(expt)  | Mr(calc)  | ppm    | Start | End  | Miss | Ions | Peptide                |
|-----------|-----------|-----------|--------|-------|------|------|------|------------------------|
| 1145.6043 | 1144.5971 | 1144.6452 | -42.02 | 28    | -37  | 1    | --   | K.RALLETEVSK.S         |
| 2225.0629 | 2224.0556 | 2224.1344 | -35.44 | 110   | -128 | 0    | --   | K.VHILDEMVLNGCIVETNR.A |

**No match to:** 958.4495, 1111.5682, 1115.5537, 1163.5241, 1179.5331, 1198.6607, 1217.6272, 1913.9460, 2248.0682

10. BPI\_MOUSE Mass: 54191 Score: 26 Expect: 40 Matches: 3

Bactericidal permeability-increasing protein OS=Mus musculus GN=Bpi PE=2 SV=1

| Observed  | Mr(expt)  | Mr(calc)  | ppm    | Start | End  | Miss | Ions | Peptide        |
|-----------|-----------|-----------|--------|-------|------|------|------|----------------|
| 958.4495  | 957.4422  | 957.4668  | -25.69 | 2     | -9   | 0    | --   | M.TWAPDNVR.K   |
| 1145.6043 | 1144.5971 | 1144.6492 | -45.53 | 411   | -419 | 1    | --   | R.WLLELKESK.F  |
| 1217.6272 | 1216.6199 | 1216.6023 | 14.5   | 1     | -10  | 1    | --   | -.MTWAPDNVRK.W |

**No match to:** 1111.5682, 1115.5537, 1163.5241, 1179.5331, 1198.6607, 1913.9460, 2225.0629, 2248.0682

Search Parameters

Type of search : MS/MS Ion Search  
Enzyme : Trypsin  
Fixed modifications : Carbamidomethyl (C)

Variable modifications : Oxidation (M)

Mass values : Monoisotopic

Protein Mass : Unrestricted

Peptide Mass Tolerance :  $\pm 50$  ppm

Fragment Mass Tolerance:  $\pm 0.6$  Da

Max Missed Cleavages : 1

Instrument type : MALDI-TOF-TOF

Query1 (958.4495,1+) : <no title>

Query2 (1111.5682,1+) : <no title>

Query3 (1115.5537,1+) : <no title>

Query4 (1145.6043,1+) : <no title>

Query5 (1163.5241,1+) : <no title>

Query6 (1179.5331,1+) : <no title>

Query7 (1198.6607,1+) : <no title>

Query8 (1217.6272,1+) : <no title>

Query9 (1913.9460,1+) : <no title>

Query10 (2225.0629,1+) : <no title>

Query11 (2248.0682,1+) : <no title>

Mascot: <http://www.matrixscience.com/>

# MASCOT Search Results

**User** :  
**Email** :  
**Search title** : Auto submitted by BioTools  
**Database** : SwissProt 57.15 (515203 sequences; 181334896 residues)  
**Taxonomy** : Mus. (16281 sequences)  
**Timestamp** : 20 May 2013 at 01:30:16 GMT  
**Warning** : A Peptide summary report will usually give a much clearer picture of MS/MS search results.  
**Top Score** : 127 for CALU\_MOUSE, Calumenin OS=Mus musculus GN=Calu PE=1 SV=1

## Mascot Score Histogram

Protein score is  $-10 \cdot \log(P)$ , where P is the probability that the observed match is a random event.

Protein scores greater than 55 are significant ( $p < 0.05$ ).

Protein scores are derived from ions scores as a non-probabilistic basis for ranking protein hits.

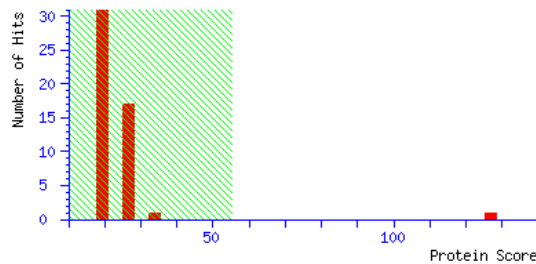

## Protein Summary Report

### Index

| Accession                      | Mass   | Score | Description                                                                                       |
|--------------------------------|--------|-------|---------------------------------------------------------------------------------------------------|
| 1. <a href="#">CALU_MOUSE</a>  | 37155  | 127   | Calumenin OS=Mus musculus GN=Calu PE=1 SV=1                                                       |
| 2. <a href="#">CENPX_MOUSE</a> | 8978   | 37    | Centromere protein X OS=Mus musculus GN=Stra13 PE=2 SV=1                                          |
| 3. <a href="#">GNPTG_MOUSE</a> | 34546  | 28    | N-acetylglucosamine-1-phosphotransferase subunit gamma OS=Mus musculus GN=Gnptg PE=2 SV=1         |
| 4. <a href="#">MUC18_MOUSE</a> | 72470  | 28    | Cell surface glycoprotein MUC18 OS=Mus musculus GN=Mcam PE=1 SV=1                                 |
| 5. <a href="#">ANO3_MOUSE</a>  | 115577 | 27    | Anoctamin-3 OS=Mus musculus GN=Ano3 PE=2 SV=1                                                     |
| 6. <a href="#">PTPA_MOUSE</a>  | 36972  | 26    | Serine/threonine-protein phosphatase 2A regulatory subunit B' OS=Mus musculus GN=Ppp2r4 PE=2 SV=1 |
| 7. <a href="#">MPPD2_MOUSE</a> | 33524  | 26    | Metallophosphoesterase MPPED2 OS=Mus musculus GN=Mpped2 PE=2 SV=1                                 |
| 8. <a href="#">S1PR4_MOUSE</a> | 43034  | 26    | Sphingosine 1-phosphate receptor 4 OS=Mus musculus GN=S1pr4 PE=2 SV=1                             |
| 9. <a href="#">ACYP1_MOUSE</a> | 11234  | 25    | Acylphosphatase-1 OS=Mus musculus GN=Acyp1 PE=2 SV=2                                              |
| 10. <a href="#">CBY3_MOUSE</a> | 26731  | 25    | Protein chibby homolog 3 OS=Mus musculus GN=Cby3 PE=2 SV=2                                        |

### Results List

1. [CALU\\_MOUSE](#) Mass: 37155 Score: 127 Expect: 3.2e-009 Matches: 6

Calumenin OS=Mus musculus GN=Calu PE=1 SV=1

| Observed  | Mr(expt)  | Mr(calc)  | ppm   | Start | End   | Miss | Ions | Peptide                      |
|-----------|-----------|-----------|-------|-------|-------|------|------|------------------------------|
| 954.4791  | 953.4718  | 953.4607  | 11.7  | 235   | - 241 | 0    | 38   | R.EQFVEFR.D                  |
| 1083.5353 | 1082.5280 | 1082.5145 | 12.5  | 104   | - 111 | 0    | ---  | R.WIHEDVER.Q                 |
| 1340.6512 | 1339.6439 | 1339.6521 | -6.08 | 232   | - 241 | 1    | ---  | K.TEREQFVEFR.D               |
| 1565.7432 | 1564.7359 | 1564.7369 | -0.61 | 60    | - 72  | 1    | 35   | K.SFDQLTPEESKER.L            |
| 1887.8437 | 1886.8364 | 1886.8435 | -3.76 | 256   | - 271 | 0    | ---  | K.DWILPSDYDHAEAEAR.H         |
| 2701.3165 | 2700.3092 | 2700.3283 | -7.07 | 288   | - 311 | 1    | ---  | K.EEIVDKYDLFVGSQATDFGEALVR.H |

**No match to:** 854.3019, 936.4669, 1338.8235, 1723.5453, 2691.2803, 2749.2675, 3043.5096

2. CENPX\_MOUSE Mass: 8978 Score: 37 Expect: 3.3 Matches: 3

Centromere protein X OS=Mus musculus GN=Stra13 PE=2 SV=1

| Observed  | Mr(expt)  | Mr(calc)  | ppm    | Start | End  | Miss | Ions | Peptide                                       |
|-----------|-----------|-----------|--------|-------|------|------|------|-----------------------------------------------|
| 936.4669  | 935.4596  | 935.4461  | 14.4   | 2     | - 9  | 1    | ---  | M_EGNSGFRK.E + Acetyl (N-term)                |
| 1083.5353 | 1082.5280 | 1082.4815 | 43.0   | 1     | - 9  | 1    | ---  | _MEGNSGFRK.E + Acetyl (N-term); Oxidation (M) |
| 1565.7432 | 1564.7359 | 1564.7919 | -35.77 | 27    | - 40 | 0    | ---  | K.VSGDALQLMAEFLR.I + Oxidation (M)            |

**No match to:** 854.3019, 954.4791, 1338.8235, 1340.6512, 1723.5453, 1887.8437, 2691.2803, 2701.3165, 2749.2675, 3043.5096

3. GNPTG\_MOUSE Mass: 34546 Score: 28 Expect: 25 Matches: 3

N-acetylglucosamine-1-phosphotransferase subunit gamma OS=Mus musculus GN=Gnptg PE=2 SV=1

| Observed  | Mr(expt)  | Mr(calc)  | ppm    | Start | End   | Miss | Ions | Peptide                                          |
|-----------|-----------|-----------|--------|-------|-------|------|------|--------------------------------------------------|
| 1083.5353 | 1082.5280 | 1082.5720 | -40.67 | 298   | - 307 | 1    | ---  | R_SDPGLRGNIL.- + Acetyl (N-term)                 |
| 2691.2803 | 2690.2730 | 2690.3281 | -20.49 | 98    | - 119 | 0    | ---  | R.WNAYSGLGIWHEWEIINNTFK.G                        |
| 2749.2675 | 2748.2602 | 2748.3501 | -32.71 | 221   | - 246 | 1    | ---  | K_VPGETHPTQLAGGSKGLGLETLDNCR.K + Acetyl (N-term) |

**No match to:** 854.3019, 936.4669, 954.4791, 1338.8235, 1340.6512, 1565.7432, 1723.5453, 1887.8437, 2701.3165, 3043.5096

4. MUC18\_MOUSE Mass: 72470 Score: 28 Expect: 28 Matches: 4

Cell surface glycoprotein MUC18 OS=Mus musculus GN=Mcam PE=1 SV=1

| Observed  | Mr(expt)  | Mr(calc)  | ppm    | Start | End   | Miss | Ions | Peptide                                         |
|-----------|-----------|-----------|--------|-------|-------|------|------|-------------------------------------------------|
| 936.4669  | 935.4596  | 935.4964  | -39.35 | 608   | - 615 | 0    | ---  | K.SEFVVEVK.S                                    |
| 1338.8235 | 1337.8162 | 1337.7932 | 17.2   | 72    | - 82  | 1    | ---  | R.QILIFRVHQGK.G                                 |
| 2691.2803 | 2690.2730 | 2690.2871 | -5.25  | 266   | - 288 | 1    | ---  | K_EGDHVTIRCLTDGNPQPHTINK.K + Acetyl (N-term)    |
| 2749.2675 | 2748.2602 | 2748.1807 | 28.9   | 290   | - 314 | 0    | ---  | K_DPSTGEMEEESTDENGLLSLEPAEK.H + Acetyl (N-term) |

**No match to:** 854.3019, 954.4791, 1083.5353, 1340.6512, 1565.7432, 1723.5453, 1887.8437, 2701.3165, 3043.5096

5. ANO3\_MOUSE Mass: 115577 Score: 27 Expect: 36 Matches: 5

Anoctamin-3 OS=Mus musculus GN=Ano3 PE=2 SV=1

| Observed  | Mr(expt)  | Mr(calc)  | ppm    | Start | End   | Miss | Ions | Peptide                                 |
|-----------|-----------|-----------|--------|-------|-------|------|------|-----------------------------------------|
| 954.4791  | 953.4718  | 953.5083  | -38.22 | 247   | - 253 | 1    | ---  | R.VQNYFKR.I                             |
| 1083.5353 | 1082.5280 | 1082.5066 | 19.7   | 454   | - 462 | 0    | ---  | R.LNDSCIYAK.V                           |
| 1340.6512 | 1339.6439 | 1339.6846 | -30.38 | 573   | - 583 | 0    | ---  | R_LVVMEQFASFK.W + Acetyl (N-term)       |
| 1887.8437 | 1886.8364 | 1886.9084 | -38.16 | 145   | - 161 | 1    | ---  | K_NDMSYIASSGLLFKDGK.K + Acetyl (N-term) |
| 2701.3165 | 2700.3092 | 2700.2312 | 28.9   | 863   | - 886 | 1    | ---  | K.GYVNNSLSFFDLSELGMGKSGYCR.Y            |

No match to: 854.3019, 936.4669, 1338.8235, 1565.7432, 1723.5453, 2691.2803, 2749.2675, 3043.5096

6. PTPA\_MOUSE Mass: 36972 Score: 26 Expect: 37 Matches: 3

Serine/threonine-protein phosphatase 2A regulatory subunit B' OS=Mus musculus GN=Ppp2r4 PE=2 SV=1

**Observed Mr(expt) Mr(calc) ppm Start End Miss Ions Peptide**

954.4791 953.4718 953.5004 -29.96 188 - 194 1 --- R.YLEVMRK.L + Oxidation (M)  
2691.2803 2690.2730 2690.3915 -44.06 77 - 99 1 --- K.LVALLDTLDRWIDETPPVDQPSR.F + Acetyl (N-term)  
2749.2675 2748.2602 2748.2961 -13.07 243 - 264 1 --- K.AVSENHKDYMFLQCILFITEMK.T + 2 Oxidation (M)

No match to: 854.3019, 936.4669, 1083.5353, 1338.8235, 1340.6512, 1565.7432, 1723.5453, 1887.8437, 2701.3165, 3043.5096

7. MPPD2\_MOUSE Mass: 33524 Score: 26 Expect: 40 Matches: 3

Metallophosphoesterase MPPED2 OS=Mus musculus GN=Mpped2 PE=2 SV=1

**Observed Mr(expt) Mr(calc) ppm Start End Miss Ions Peptide**

936.4669 935.4596 935.4825 -24.46 2 - 10 0 --- M<sub>2</sub>AHGIPSQGK.V + Acetyl (N-term)  
1083.5353 1082.5280 1082.5179 9.34 1 - 10 0 --- MAHGIPSQGK.V + Acetyl (N-term); Oxidation (M)  
3043.5096 3042.5023 3042.5790 -25.19 200 - 225 1 --- K<sub>2</sub>WNLPIEGIDILMTHGPPPLGFRDWVPK.E + Acetyl (N-term)

No match to: 854.3019, 954.4791, 1338.8235, 1340.6512, 1565.7432, 1723.5453, 1887.8437, 2691.2803, 2701.3165, 2749.2675

8. S1PR4\_MOUSE Mass: 43034 Score: 26 Expect: 44 Matches: 2

Sphingosine 1-phosphate receptor 4 OS=Mus musculus GN=S1pr4 PE=2 SV=1

**Observed Mr(expt) Mr(calc) ppm Start End Miss Ions Peptide**

954.4791 953.4718 953.4753 -3.59 368 - 374 1 14 R<sub>2</sub>SLSFRMR.E + Acetyl (N-term); Oxidation (M)  
1887.8437 1886.8364 1886.8945 -30.80 2 - 17 0 --- M.NISTWSTLVTPESCHR.L

No match to: 854.3019, 936.4669, 1083.5353, 1338.8235, 1340.6512, 1565.7432, 1723.5453, 2691.2803, 2701.3165, 2749.2675, 3043.5096

9. ACYP1\_MOUSE Mass: 11234 Score: 25 Expect: 49 Matches: 2

Acylphosphatase-1 OS=Mus musculus GN=Acyp1 PE=2 SV=2

**Observed Mr(expt) Mr(calc) ppm Start End Miss Ions Peptide**

1340.6512 1339.6439 1339.7096 -49.03 46 - 58 0 --- R<sub>2</sub>GTVQQLQGPVSK.V + Acetyl (N-term)  
2749.2675 2748.2602 2748.3469 -31.56 1 - 24 1 --- MAEAGDTLVSVDYEIFGKVQGVFFR.K + Acetyl (N-term)

No match to: 854.3019, 936.4669, 954.4791, 1083.5353, 1338.8235, 1565.7432, 1723.5453, 1887.8437, 2691.2803, 2701.3165, 3043.5096

10. CBY3\_MOUSE Mass: 26731 Score: 25 Expect: 55 Matches: 3

Protein chibby homolog 3 OS=Mus musculus GN=Cby3 PE=2 SV=2

**Observed Mr(expt) Mr(calc) ppm Start End Miss Ions Peptide**

1083.5353 1082.5280 1082.5397 -10.79 122 - 130 0 --- R.LSDEAFVFR.G  
1340.6512 1339.6439 1339.6884 -33.25 120 - 130 1 --- R.TRLSDEAFVFR.G  
2749.2675 2748.2602 2748.3694 -39.72 46 - 69 1 --- R<sub>2</sub>VAHITFTLEAFECLAASQAGRLWK.Q + Acetyl (N-term)

No match to: 854.3019, 936.4669, 954.4791, 1338.8235, 1565.7432, 1723.5453, 1887.8437, 2691.2803, 2701.3165, 3043.5096

Search Parameters

Type of search : MS/MS Ion Search

Enzyme : Trypsin  
Fixed modifications : Carbamidomethyl (C)  
Variable modifications : Acetyl (N-term), Oxidation (M)  
Mass values : Monoisotopic  
Protein Mass : Unrestricted  
Peptide Mass Tolerance :  $\pm 50$  ppm  
Fragment Mass Tolerance:  $\pm 0.5$  Da  
Max Missed Cleavages : 1  
Instrument type : MALDI-TOF-TOF  
Query1 (854.3019,1+) : <no title>  
Query2 (936.4669,1+) : <no title>  
Query3 (954.4791,1+) : <no title>  
Query4 (1083.5353,1+) : <no title>  
Query5 (1338.8235,1+) : <no title>  
Query6 (1340.6512,1+) : <no title>  
Query7 (1565.7432,1+) : <no title>  
Query8 (1723.5453,1+) : <no title>  
Query9 (1887.8437,1+) : <no title>  
Query10 (2691.2803,1+) : <no title>  
Query11 (2701.3165,1+) : <no title>  
Query12 (2749.2675,1+) : <no title>  
Query13 (3043.5096,1+) : <no title>

Mascot: <http://www.matrixscience.com/>

 **Mascot Search Results**

User :  
Email :  
Search title : Auto submitted by BioTools  
Database : SwissProt 57.15 (515203 sequences; 181334896 residues)  
Taxonomy : Mus musculus (house mouse) (16230 sequences)  
Timestamp : 20 Jun 2013 at 07:30:53 GMT  
Warning : A Peptide summary report will usually give a much clearer picture of MS/MS search results.  
Top Score : 78 for KCRB\_MOUSE, Creatine kinase B-type OS=Mus musculus GN=Ckb PE=1 SV=1

**Mascot Score Histogram**

Protein score is  $-10 \cdot \log(P)$ , where P is the probability that the observed match is a random event.

Protein scores greater than 55 are significant ( $p < 0.05$ ).

Protein scores are derived from ions scores as a non-probabilistic basis for ranking protein hits.

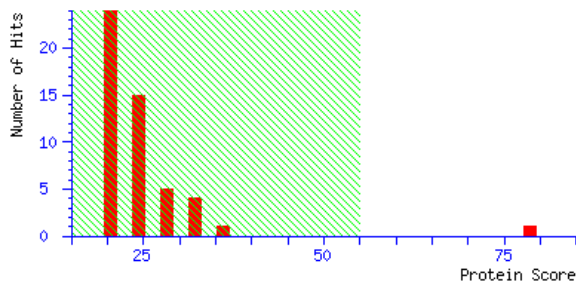

## Protein Summary Report

### Index

| Accession                             | Mass   | Score | Description                                                                                  |
|---------------------------------------|--------|-------|----------------------------------------------------------------------------------------------|
| 1. <u><a href="#">KCRB_MOUSE</a></u>  | 42971  | 78    | Creatine kinase B-type OS=Mus musculus GN=Ckb PE=1 SV=1                                      |
| 2. <u><a href="#">ALDOC_MOUSE</a></u> | 39769  | 36    | Fructose-bisphosphate aldolase C OS=Mus musculus GN=Aldoc PE=1 SV=4                          |
| 3. <u><a href="#">TBAL3_MOUSE</a></u> | 50625  | 34    | Tubulin alpha chain-like 3 OS=Mus musculus GN=Tubal3 PE=2 SV=1                               |
| 4. <u><a href="#">IFI4_MOUSE</a></u>  | 72347  | 33    | Interferon-activable protein 204 OS=Mus musculus GN=Ifi204 PE=1 SV=2                         |
| 5. <u><a href="#">TF3C4_MOUSE</a></u> | 92905  | 32    | General transcription factor 3C polypeptide 4 OS=Mus musculus GN=Gtf3c4 PE=1 SV=1            |
| 6. <u><a href="#">T11L2_MOUSE</a></u> | 58423  | 31    | T-complex protein 11-like protein 2 OS=Mus musculus GN=Tcp11l2 PE=2 SV=1                     |
| 7. <u><a href="#">CPSF3_MOUSE</a></u> | 78049  | 30    | Cleavage and polyadenylation specificity factor subunit 3 OS=Mus musculus GN=Cpsf3 PE=1 SV=1 |
| 8. <u><a href="#">MYO9B_MOUSE</a></u> | 240225 | 28    | Myosin-IXb OS=Mus musculus GN=Myo9b PE=1 SV=2                                                |
| 9. <u><a href="#">GCH1_MOUSE</a></u>  | 27168  | 28    | GTP cyclohydrolase 1 OS=Mus musculus GN=Gch1 PE=2 SV=1                                       |
| 10. <u><a href="#">P66B_MOUSE</a></u> | 65712  | 27    | Transcriptional repressor p66-beta OS=Mus musculus GN=Gatad2b PE=1 SV=1                      |

### Results List

1. [KCRB\\_MOUSE](#) Mass: 42971 Score: 78 Expect: 0.00023 Matches: 7

Creatine kinase B-type OS=Mus musculus GN=Ckb PE=1 SV=1

**Observed Mr(expt) Mr(calc) ppm Start End Miss Ions Peptide**

1031.5540 1030.5467 1030.5481 -1.36 359 - 366 0 --- K.LLIEMEQR.L  
 1230.5507 1229.5434 1229.5434 0.00 139 - 148 0 --- R.GFCLPPHCSR.G  
 1246.6227 1245.6154 1245.6241 -6.99 87 - 96 0 --- K.DLFDPIIEER.H  
 1303.7137 1302.7064 1302.7183 -9.15 33 - 43 0 2 K.VLTPELYAELR.A  
 1602.8152 1601.8079 1601.8260 -11.31 157 - 172 0 --- K.LAVEALSSLDGDLGR.Y  
 1671.8329 1670.8257 1670.8416 -9.56 224 - 236 0 --- K.TFLVWINEEDHLR.V  
 1964.9061 1963.8988 1963.9236 -12.63 321 - 341 0 --- R.GTGGVDTAAVGGVFDVSNADR.L

**No match to:** 955.4451, 1108.5378, 1198.6730, 1338.8166, 1348.6620, 1474.7198, 1665.9785, 1703.8146, 1755.9081, 1949.8964, 1981.8843, 1997.8835, 2247.0768

2. [ALDOC\\_MOUSE](#) Mass: 39769 Score: 36 Expect: 4.3 Matches: 4

Fructose-bisphosphate aldolase C OS=Mus musculus GN=Aldoc PE=1 SV=4

**Observed Mr(expt) Mr(calc) ppm Start End Miss Ions Peptide**

1348.6620 1347.6548 1347.6704 -11.60 29 - 42 0 --- K.GILAADESVGSMAR



1474.7198 1473.7125 1473.6922 13.8 1 - 13 0 --- -.MPHSPALSAEQK.K + Oxidation (M)  
 1602.8152 1601.8079 1601.7871 13.0 1 - 14 1 --- -.MPHSPALSAEQK.E + Oxidation (M)  
 1671.8329 1670.8257 1670.8702 -26.63 202 - 215 1 --- R.CQYVTEKVLAAVYK.A  
**No match to:** 955.4451, 1031.5540, 1108.5378, 1198.6730, 1230.5507, 1246.6227, 1303.7137, 1338.8166, 1665.9785, 1703.8146, 1755.9081, 1949.8964, 1964.9061, 1981.8843, 1997.8835, 2247.0768

3. TBAL3\_MOUSE Mass: 50625 Score: 34 Expect: 6.8 Matches: 4

Tubulin alpha chain-like 3 OS=Mus musculus GN=Tubal3 PE=2 SV=1

**Observed Mr(expt) Mr(calc) ppm Start End Miss Ions Peptide**

1031.5540 1030.5467 1030.5157 30.0 402 - 409 1 --- K.FDLMYAKK.A + Oxidation (M)  
 1671.8329 1670.8257 1670.7763 29.5 346 - 359 0 --- R.TSVQFVDWCPTGFK.V  
 1703.8146 1702.8074 1702.7985 5.21 147 - 163 0 --- R.SFGGGTSGSFTSLLMER.L  
 1949.8964 1948.8892 1948.8738 7.90 49 - 64 0 --- K.VEHMNASLDTFFHETR.A + Oxidation (M)

**No match to:** 955.4451, 1108.5378, 1198.6730, 1230.5507, 1246.6227, 1303.7137, 1338.8166, 1348.6620, 1474.7198, 1602.8152, 1665.9785, 1755.9081, 1964.9061, 1981.8843, 1997.8835, 2247.0768

4. IFI4\_MOUSE Mass: 72347 Score: 33 Expect: 8.7 Matches: 5

Interferon-activable protein 204 OS=Mus musculus GN=Ifi204 PE=1 SV=2

**Observed Mr(expt) Mr(calc) ppm Start End Miss Ions Peptide**

955.4451 954.4379 954.4593 -22.42 1 - 7 1 --- -.MVNEYKR.I + Oxidation (M)  
 1348.6620 1347.6548 1347.6347 14.9 578 - 589 0 --- K.FIYYGIGDDTGK.M  
 1474.7198 1473.7125 1473.7504 -25.68 302 - 313 0 --- K.NFIISNYFESK.G  
 1602.8152 1601.8079 1601.8453 -23.33 301 - 313 1 --- K.KNFIISNYFESK.G  
 1755.9081 1754.9008 1754.8814 11.1 13 - 26 1 --- R.GLECINKHYFSLFK.S

**No match to:** 1031.5540, 1108.5378, 1198.6730, 1230.5507, 1246.6227, 1303.7137, 1338.8166, 1665.9785, 1671.8329, 1703.8146, 1949.8964, 1964.9061, 1981.8843, 1997.8835, 2247.0768

5. TF3C4\_MOUSE Mass: 92905 Score: 32 Expect: 9.1 Matches: 5

General transcription factor 3C polypeptide 4 OS=Mus musculus GN=Gt3c4 PE=1 SV=1

**Observed Mr(expt) Mr(calc) ppm Start End Miss Ions Peptide**

955.4451 954.4379 954.4705 -34.22 239 - 246 0 --- R.HSMQTPVR.M  
 1198.6730 1197.6657 1197.6176 40.2 671 - 680 0 --- K.IEAVEMHLTR.E  
 1671.8329 1670.8257 1670.7683 34.4 430 - 444 1 --- K.QNGTVYTCSSDGKVR.Q  
 1755.9081 1754.9008 1754.8443 32.2 671 - 684 1 --- K.IEAVEMHLTREHMK.R + 2 Oxidation (M)  
 1949.8964 1948.8892 1948.9027 -6.96 222 - 238 1 --- K.NEAPEGNLGDAEFQRR.H

**No match to:** 1031.5540, 1108.5378, 1230.5507, 1246.6227, 1303.7137, 1338.8166, 1348.6620, 1474.7198, 1602.8152, 1665.9785, 1703.8146, 1964.9061, 1981.8843, 1997.8835, 2247.0768

6. T11L2\_MOUSE Mass: 58423 Score: 31 Expect: 13 Matches: 4

T-complex protein 11-like protein 2 OS=Mus musculus GN=Tcp11l2 PE=2 SV=1

**Observed Mr(expt) Mr(calc) ppm Start End Miss Ions Peptide**

1348.6620 1347.6548 1347.6275 20.2 429 - 439 1 --- K.DNPVCTLMDKR.I  
 1474.7198 1473.7125 1473.7405 -18.98 487 - 498 0 --- K.QVYGPFIYANIFR.K

1602.8152 1601.8079 1601.8354 -17.17 487 - 499 1 --- K.QVYGPFIYANIFRK.L  
 1755.9081 1754.9008 1754.8621 22.1 385 - 400 0 --- K.EALHSIGVQTCAEVVK.A  
**No match to:** 955.4451, 1031.5540, 1108.5378, 1198.6730, 1230.5507, 1246.6227, 1303.7137, 1338.8166, 1665.9785, 1671.8329, 1703.8146, 1949.8964, 1964.9061, 1981.8843, 1997.8835, 2247.0768

7. CPSF3\_MOUSE Mass: 78049 Score: 30 Expect: 18 Matches: 5

Cleavage and polyadenylation specificity factor subunit 3 OS=Mus musculus GN=Cps3 PE=1 SV=1

| Observed  | Mr(expt)  | Mr(calc)  | ppm    | Start | End | Miss | Ions | Peptide                                   |
|-----------|-----------|-----------|--------|-------|-----|------|------|-------------------------------------------|
| 1031.5540 | 1030.5467 | 1030.5407 | 5.81   | 643   | -   | 651  | 0    | --- K.TANINLETR.A                         |
| 1703.8146 | 1702.8074 | 1702.8825 | -44.10 | 466   | -   | 480  | 1    | --- K.VMGFLADKKPEQGQR.V                   |
| 1981.8843 | 1980.8770 | 1980.9537 | -38.68 | 614   | -   | 630  | 0    | --- R.LEVMLQDIFGEDCVSVK.D                 |
| 1997.8835 | 1996.8762 | 1996.9486 | -36.25 | 614   | -   | 630  | 0    | --- R.LEVMLQDIFGEDCVSVK.D + Oxidation (M) |
| 2247.0768 | 2246.0695 | 2246.1390 | -30.96 | 631   | -   | 651  | 1    | --- K.DDSVLSVTVDGKTANINLETR.A             |

**No match to:** 955.4451, 1108.5378, 1198.6730, 1230.5507, 1246.6227, 1303.7137, 1338.8166, 1348.6620, 1474.7198, 1602.8152, 1665.9785, 1671.8329, 1755.9081, 1949.8964, 1964.9061

8. MYO9B\_MOUSE Mass: 240225 Score: 28 Expect: 26 Matches: 7

Myosin-IXb OS=Mus musculus GN=Myo9b PE=1 SV=2

| Observed  | Mr(expt)  | Mr(calc)  | ppm    | Start | End | Miss | Ions | Peptide                                |
|-----------|-----------|-----------|--------|-------|-----|------|------|----------------------------------------|
| 1031.5540 | 1030.5467 | 1030.5910 | -43.02 | 447   | -   | 455  | 0    | --- R.ETLVEVLT.K.R                     |
| 1198.6730 | 1197.6657 | 1197.6540 | 9.84   | 801   | -   | 810  | 0    | --- R.LIISMTHDR.T                      |
| 1303.7137 | 1302.7064 | 1302.6788 | 21.2   | 2018  | -   | 2028 | 1    | --- R.RTPIMPANIK.L + 2 Oxidation (M)   |
| 1474.7198 | 1473.7125 | 1473.7385 | -17.63 | 1234  | -   | 1247 | 0    | --- R.VSPMLPSSLESPEK.D + Oxidation (M) |
| 1671.8329 | 1670.8257 | 1670.8046 | 12.6   | 230   | -   | 245  | 0    | --- K.HVNQCIVISGESGSK.T                |
| 1755.9081 | 1754.9008 | 1754.8257 | 42.8   | 722   | -   | 737  | 1    | --- R.SHMEELPRGASTPSEK.L               |
| 1964.9061 | 1963.8988 | 1963.9673 | -34.88 | 1523  | -   | 1539 | 0    | --- K.DLMENYQIVVSNLAAER.G              |

**No match to:** 955.4451, 1108.5378, 1230.5507, 1246.6227, 1338.8166, 1348.6620, 1602.8152, 1665.9785, 1703.8146, 1949.8964, 1981.8843, 1997.8835, 2247.0768

9. GCH1\_MOUSE Mass: 27168 Score: 28 Expect: 28 Matches: 3

GTP cyclohydrolase 1 OS=Mus musculus GN=Gch1 PE=2 SV=1

| Observed  | Mr(expt)  | Mr(calc)  | ppm    | Start | End | Miss | Ions | Peptide                                  |
|-----------|-----------|-----------|--------|-------|-----|------|------|------------------------------------------|
| 1348.6620 | 1347.6548 | 1347.7146 | -44.42 | 17    | -   | 29   | 0    | --- R.ELPRGASPPAEK.S                     |
| 1671.8329 | 1670.8257 | 1670.8239 | 1.07   | 85    | -   | 98   | 1    | --- K.TPWRAATAMQYFTK.G                   |
| 1703.8146 | 1702.8074 | 1702.8382 | -18.14 | 212   | -   | 226  | 1    | --- K.MNSKTVTSTMLGVFRE + 2 Oxidation (M) |

**No match to:** 955.4451, 1031.5540, 1108.5378, 1198.6730, 1230.5507, 1246.6227, 1303.7137, 1338.8166, 1474.7198, 1602.8152, 1665.9785, 1755.9081, 1949.8964, 1964.9061, 1981.8843, 1997.8835, 2247.0768

10. P66B\_MOUSE Mass: 65712 Score: 27 Expect: 34 Matches: 4

Transcriptional repressor p66-beta OS=Mus musculus GN=Gatad2b PE=1 SV=1

| Observed  | Mr(expt)  | Mr(calc)  | ppm    | Start | End | Miss | Ions | Peptide            |
|-----------|-----------|-----------|--------|-------|-----|------|------|--------------------|
| 1108.5378 | 1107.5305 | 1107.5746 | -39.86 | 149   | -   | 158  | 1    | --- K.AANLEMFKGK.G |
| 1246.6227 | 1245.6154 | 1245.6427 | -21.94 | 575   | -   | 584  | 0    | --- R.EYLLDMIPPR.S |

1703.8146 1702.8074 1702.8131 -3.35 251 - 265 0 --- R.SATNTTLPHTMLMSQR.V + Oxidation (M)

2247.0768 2246.0695 2246.1543 -37.74 53 - 73 1 --- K.DLANLEVPHELPTKQDGSQV.K

**No match to:** 955.4451, 1031.5540, 1198.6730, 1230.5507, 1303.7137, 1338.8166, 1348.6620, 1474.7198, 1602.8152, 1665.9785, 1671.8329, 1755.9081, 1949.8964, 1964.9061, 1981.8843, 1997.8835

#### Search Parameters

Type of search : MS/MS Ion Search

Enzyme : Trypsin

Fixed modifications : Carbamidomethyl (C)

Variable modifications : Oxidation (M)

Mass values : Monoisotopic

Protein Mass : Unrestricted

Peptide Mass Tolerance :  $\pm 50$  ppm

Fragment Mass Tolerance:  $\pm 0.6$  Da

Max Missed Cleavages : 1

Instrument type : MALDI-TOF-TOF

Query1 (955.4451,1+) : <no title>

Query2 (1031.5540,1+) : <no title>

Query3 (1108.5378,1+) : <no title>

Query4 (1198.6730,1+) : <no title>

Query5 (1230.5507,1+) : <no title>

Query6 (1246.6227,1+) : <no title>

Query7 (1303.7137,1+) : <no title>

Query8 (1338.8166,1+) : <no title>

Query9 (1348.6620,1+) : <no title>

Query10 (1474.7198,1+) : <no title>

Query11 (1602.8152,1+) : <no title>

Query12 (1665.9785,1+) : <no title>

Query13 (1671.8329,1+) : <no title>

Query14 (1703.8146,1+) : <no title>

Query15 (1755.9081,1+) : <no title>

Query16 (1949.8964,1+) : <no title>

Query17 (1964.9061,1+) : <no title>

Query18 (1981.8843,1+) : <no title>

Query19 (1997.8835,1+) : <no title>

Query20 (2247.0768,1+) : <no title>

**Mascot:** <http://www.matrixscience.com/>

# **MASCOT** Mascot Search Results **SCIENCE**

User :  
Email :  
Search title : Auto submitted by BioTools  
Database : IPI\_mouse (59534 sequences; 26627161 residues)  
Timestamp : 20 May 2013 at 02:33:54 GMT  
Warning : A Peptide summary report will usually give a much clearer picture of MS/MS search results.  
Top Score : 588 for IPI00169998, Tax\_Id=10090 Gene\_Symbol=Cbr3 carbonyl reductase 3

## Mascot Score Histogram

Protein score is  $-10 \cdot \log(P)$ , where P is the probability that the observed match is a random event.

Protein scores greater than 60 are significant ( $p < 0.05$ ).

Protein scores are derived from ions scores as a non-probabilistic basis for ranking protein hits.

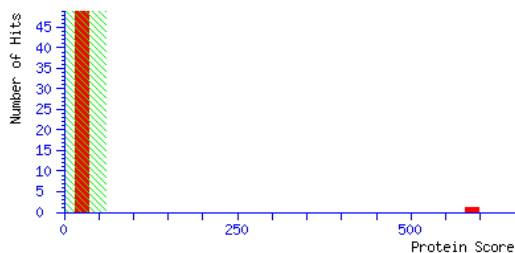

## Protein Summary Report

### Index

| Accession                       | Mass   | Score | Description                                                                                    |
|---------------------------------|--------|-------|------------------------------------------------------------------------------------------------|
| 1. <a href="#">IPI00169998</a>  | 31333  | 588   | Tax_Id=10090 Gene_Symbol=Cbr3 carbonyl reductase 3                                             |
| 2. <a href="#">IPI00458084</a>  | 9010   | 35    | Tax_Id=10090 Gene_Symbol=Fkbp1b FK506-binding protein                                          |
| 3. <a href="#">IPI00338579</a>  | 64341  | 34    | Tax_Id=10090 Gene_Symbol=Cdk2 Isoform 2 of Cyclin-dependent kinase-like 2                      |
| 4. <a href="#">IPI00131724</a>  | 64699  | 34    | Tax_Id=10090 Gene_Symbol=Cdk2 Isoform 1 of Cyclin-dependent kinase-like 2                      |
| 5. <a href="#">IPI00607992</a>  | 70919  | 33    | Tax_Id=10090 Gene_Symbol=Invs Isoform 6 of Inversin                                            |
| 6. <a href="#">IPI01007702</a>  | 70885  | 33    | Tax_Id=10090 Gene_Symbol=Invs Uncharacterized protein                                          |
| 7. <a href="#">IPI00607908</a>  | 105463 | 33    | Tax_Id=10090 Gene_Symbol=Invs Isoform 3 of Inversin                                            |
| 8. <a href="#">IPI00608108</a>  | 105461 | 33    | Tax_Id=10090 Gene_Symbol=Invs Uncharacterized protein                                          |
| 9. <a href="#">IPI00338570</a>  | 61511  | 33    | Tax_Id=10090 Gene_Symbol=Daam2 Isoform 2 of Disheveled-associated activator of morphogenesis 2 |
| 10. <a href="#">IPI00137096</a> | 15220  | 32    | Tax_Id=10090 Gene_Symbol=4933414I15Rik Putative uncharacterized protein (Fragment)             |

## Results List

1. [IPI00169998](#) Mass: 31333 Score: 588 Expect: 9.4e-055 Matches: 13  
Tax\_Id=10090 Gene\_Symbol=Cbr3 carbonyl reductase 3

| Observed  | Mr(expt)  | Mr(calc)  | ppm   | Start | End | Miss | Ions | Peptide                          |
|-----------|-----------|-----------|-------|-------|-----|------|------|----------------------------------|
| 834.4958  | 833.4886  | 833.4759  | 15.1  | 16    | 23  | 0    | ---  | K.GIGFAITR.D                     |
| 1192.7265 | 1191.7193 | 1191.6612 | 48.7  | 28    | 38  | 1    | ---  | R.KFSGDVVLTAR.D                  |
| 1430.7759 | 1429.7687 | 1429.7210 | 33.3  | 221   | 232 | 0    | ---  | R.ILLNACCPGWVK.T                 |
| 1467.8476 | 1466.8403 | 1466.7841 | 38.3  | 45    | 58  | 0    | 107  | R.AAVQQLQAEGLSPR.F               |
| 1502.7730 | 1501.7658 | 1501.7161 | 33.1  | 175   | 186 | 1    | ---  | K.FVEDTKNEVHER.E                 |
| 1504.7627 | 1503.7554 | 1503.6987 | 37.7  | 146   | 157 | 1    | ---  | K.ALENCREDLQEK.F                 |
| 1583.8329 | 1582.8256 | 1582.7740 | 32.6  | 59    | 71  | 0    | 92   | R.FHQLDIDDPQSIR.A                |
| 1764.9646 | 1763.9573 | 1763.9175 | 22.6  | 120   | 134 | 0    | 60   | R.NVCTELLPIMKPHGR.V              |
| 1779.9264 | 1778.9191 | 1778.8794 | 22.3  | 160   | 174 | 1    | ---  | R.CDTLTEVDLVLMKK.F               |
| 1806.9929 | 1805.9856 | 1805.9424 | 23.9  | 80    | 96  | 0    | 130  | K.EYGGLNVLVNNAGIAFR.M            |
| 1935.0814 | 1934.0741 | 1934.0374 | 19.0  | 79    | 96  | 1    | 63   | R.KEYGGLNVLVNNAGIAFR.M           |
| 1955.0025 | 1953.9953 | 1953.9540 | 21.1  | 158   | 173 | 1    | ---  | K.FRCDTLTEVDLVLMK.K              |
| 3002.5446 | 3001.5373 | 3001.5397 | -0.79 | 243   | 270 | 0    | ---  | R.TVEEGAETPVYLALLPPDATEPHGQLVR.D |

**No match to:** 855.3819, 856.5197, 1064.6435, 1332.7919, 1452.7712, 1454.7674, 1630.8647, 1725.9813, 1777.8799, 1788.9702, 1844.9402, 2086.1738, 3016.5633, 3030.5908

2. IPI00458084 Mass: 9010 Score: 35 Expect: 20 Matches: 3

Tax\_Id=10090 Gene\_Symbol=Fkbp1b FK506-binding protein

| Observed  | Mr(expt)  | Mr(calc)  | ppm  | Start | End | Miss | Ions | Peptide                                            |
|-----------|-----------|-----------|------|-------|-----|------|------|----------------------------------------------------|
| 1502.7730 | 1501.7658 | 1501.7083 | 38.3 | 1     | 14  | 0    | ---  | _MGVEIETISPGDGR.T + Acetyl (N-term)                |
| 1844.9402 | 1843.9329 | 1843.9316 | 0.72 | 2     | 18  | 1    | ---  | M_GVEIETISPGDGRTPK.K + Acetyl (N-term)             |
| 3016.5633 | 3015.5560 | 3015.4834 | 24.1 | 54    | 80  | 1    | ---  | K_QEVIKGFEEGT AQLGPLSPLPICPHPC.- + Acetyl (N-term) |

**No match to:** 834.4958, 855.3819, 856.5197, 1064.6435, 1192.7265, 1332.7919, 1430.7759, 1452.7712, 1454.7674, 1467.8476, 1504.7627, 1583.8329, 1630.8647, 1725.9813, 1764.9646, 1777.8799, 1779.9264, 1788.9702, 1806.9929, 1935.0814, 1955.0025, 2086.1738, 3002.5446, 3030.5908

3. IPI00338579 Mass: 64341 Score: 34 Expect: 23 Matches: 5

Tax\_Id=10090 Gene\_Symbol=Cdkl2 Isoform 2 of Cyclin-dependent kinase-like 2

| Observed  | Mr(expt)  | Mr(calc)  | ppm    | Start | End | Miss | Ions | Peptide                              |
|-----------|-----------|-----------|--------|-------|-----|------|------|--------------------------------------|
| 1430.7759 | 1429.7687 | 1429.7817 | -9.09  | 169   | 181 | 1    | ---  | R_APELLVGDVKYGK.A + Acetyl (N-term)  |
| 1467.8476 | 1466.8403 | 1466.8245 | 10.7   | 232   | 244 | 1    | 4    | K_NPVFAGVRLPEVK.D + Acetyl (N-term)  |
| 1504.7627 | 1503.7554 | 1503.7205 | 23.2   | 245   | 257 | 1    | ---  | K.DAEAEPLSRYPK.L                     |
| 1583.8329 | 1582.8256 | 1582.8566 | -19.59 | 336   | 349 | 1    | 8    | K_TLVVQDTNADPKIK.D + Acetyl (N-term) |
| 1725.9813 | 1724.9741 | 1724.9672 | 3.96   | 126   | 141 | 0    | ---  | R.DIKPENILVSQSGVVK.L                 |

**No match to:** 834.4958, 855.3819, 856.5197, 1064.6435, 1192.7265, 1332.7919, 1452.7712, 1454.7674, 1502.7730, 1630.8647, 1764.9646, 1777.8799, 1779.9264, 1788.9702, 1806.9929, 1844.9402, 1935.0814, 1955.0025, 2086.1738, 3002.5446, 3016.5633, 3030.5908

4. IPI00131724 Mass: 64699 Score: 34 Expect: 23 Matches: 5

Tax\_Id=10090 Gene\_Symbol=Cdkl2 Isoform 1 of Cyclin-dependent kinase-like 2

| Observed  | Mr(expt)  | Mr(calc)  | ppm   | Start | End | Miss | Ions | Peptide                             |
|-----------|-----------|-----------|-------|-------|-----|------|------|-------------------------------------|
| 1430.7759 | 1429.7687 | 1429.7817 | -9.09 | 169   | 181 | 1    | ---  | R_APELLVGDVKYGK.A + Acetyl (N-term) |
| 1467.8476 | 1466.8403 | 1466.8245 | 10.7  | 232   | 244 | 1    | 4    | K_NPVFAGVRLPEVK.D + Acetyl (N-term) |

1504.7627 1503.7554 1503.7205 23.2 245 - 257 1 --- K.DAEAEPLSRYPK.L  
 1583.8329 1582.8256 1582.8566 -19.59 336 - 349 1 8 K.TLVVQDTNADPKIK.D + Acetyl (N-term)  
 1725.9813 1724.9741 1724.9672 3.96 126 - 141 0 --- R.DIKPENILVSGVVK.L  
**No match to:** 834.4958, 855.3819, 856.5197, 1064.6435, 1192.7265, 1332.7919, 1452.7712, 1454.7674, 1502.7730, 1630.8647, 1764.9646,  
 1777.8799, 1779.9264, 1788.9702, 1806.9929, 1844.9402, 1935.0814, 1955.0025, 2086.1738, 3002.5446, 3016.5633, 3030.5908

5. IPI00607992 Mass: 70919 Score: 33 Expect: 28 Matches: 4

Tax\_Id=10090 Gene\_Symbol=Invs Isoform 6 of Inversin

| Observed  | Mr(expt)  | Mr(calc)  | ppm    | Start | End   | Miss | Ions | Peptide                                                                            |
|-----------|-----------|-----------|--------|-------|-------|------|------|------------------------------------------------------------------------------------|
| 1452.7712 | 1451.7639 | 1451.7296 | 23.6   | 525   | - 536 | 0    | ---  | R <sub>2</sub> YTPLDYALLGER.H + Acetyl (N-term)                                    |
| 1467.8476 | 1466.8403 | 1466.8681 | -18.96 | 28    | - 41  | 1    | 16   | K.GALQRLIVGNSALR.D                                                                 |
| 1583.8329 | 1582.8256 | 1582.7661 | 37.6   | 111   | - 123 | 0    | ---  | K <sub>2</sub> DLEEMTPLHLSTR.H + Acetyl (N-term)                                   |
| 3016.5633 | 3015.5560 | 3015.4608 | 31.6   | 346   | - 374 | 1    | ---  | K <sub>2</sub> SDIDINMSDKYGGTALHAAALSGHVSTVK.L + Acetyl (N-term);<br>Oxidation (M) |

**No match to:** 834.4958, 855.3819, 856.5197, 1064.6435, 1192.7265, 1332.7919, 1430.7759, 1454.7674, 1502.7730, 1504.7627, 1630.8647,  
 1725.9813, 1764.9646, 1777.8799, 1779.9264, 1788.9702, 1806.9929, 1844.9402, 1935.0814, 1955.0025, 2086.1738, 3002.5446, 3030.5908

6. IPI01007702 Mass: 70885 Score: 33 Expect: 28 Matches: 4

Tax\_Id=10090 Gene\_Symbol=Invs Uncharacterized protein

| Observed  | Mr(expt)  | Mr(calc)  | ppm    | Start | End   | Miss | Ions | Peptide                                                                            |
|-----------|-----------|-----------|--------|-------|-------|------|------|------------------------------------------------------------------------------------|
| 1452.7712 | 1451.7639 | 1451.7296 | 23.6   | 525   | - 536 | 0    | ---  | R <sub>2</sub> YTPLDYALLGER.H + Acetyl (N-term)                                    |
| 1467.8476 | 1466.8403 | 1466.8681 | -18.96 | 28    | - 41  | 1    | 16   | K.GALQRLIVGNSALR.D                                                                 |
| 1583.8329 | 1582.8256 | 1582.7661 | 37.6   | 111   | - 123 | 0    | ---  | K <sub>2</sub> DLEEMTPLHLSTR.H + Acetyl (N-term)                                   |
| 3016.5633 | 3015.5560 | 3015.4608 | 31.6   | 346   | - 374 | 1    | ---  | K <sub>2</sub> SDIDINMSDKYGGTALHAAALSGHVSTVK.L + Acetyl (N-term);<br>Oxidation (M) |

**No match to:** 834.4958, 855.3819, 856.5197, 1064.6435, 1192.7265, 1332.7919, 1430.7759, 1454.7674, 1502.7730, 1504.7627, 1630.8647,  
 1725.9813, 1764.9646, 1777.8799, 1779.9264, 1788.9702, 1806.9929, 1844.9402, 1935.0814, 1955.0025, 2086.1738, 3002.5446, 3030.5908

7. IPI00607908 Mass: 105463 Score: 33 Expect: 28 Matches: 5

Tax\_Id=10090 Gene\_Symbol=Invs Isoform 3 of Inversin

| Observed  | Mr(expt)  | Mr(calc)  | ppm    | Start | End   | Miss | Ions | Peptide                                                                            |
|-----------|-----------|-----------|--------|-------|-------|------|------|------------------------------------------------------------------------------------|
| 1452.7712 | 1451.7639 | 1451.7296 | 23.6   | 525   | - 536 | 0    | ---  | R <sub>2</sub> YTPLDYALLGER.H + Acetyl (N-term)                                    |
| 1467.8476 | 1466.8403 | 1466.8681 | -18.96 | 28    | - 41  | 1    | 16   | K.GALQRLIVGNSALR.D                                                                 |
| 1504.7627 | 1503.7554 | 1503.7351 | 13.5   | 730   | - 743 | 1    | ---  | R <sub>2</sub> GLPLSTEASRSGCK.Q + Acetyl (N-term)                                  |
| 1583.8329 | 1582.8256 | 1582.7661 | 37.6   | 111   | - 123 | 0    | ---  | K <sub>2</sub> DLEEMTPLHLSTR.H + Acetyl (N-term)                                   |
| 3016.5633 | 3015.5560 | 3015.4608 | 31.6   | 346   | - 374 | 1    | ---  | K <sub>2</sub> SDIDINMSDKYGGTALHAAALSGHVSTVK.L + Acetyl<br>(N-term); Oxidation (M) |

**No match to:** 834.4958, 855.3819, 856.5197, 1064.6435, 1192.7265, 1332.7919, 1430.7759, 1454.7674, 1502.7730, 1630.8647, 1725.9813,  
 1764.9646, 1777.8799, 1779.9264, 1788.9702, 1806.9929, 1844.9402, 1935.0814, 1955.0025, 2086.1738, 3002.5446, 3030.5908

8. IPI00608108 Mass: 105461 Score: 33 Expect: 28 Matches: 5

Tax\_Id=10090 Gene\_Symbol=Invs Uncharacterized protein

**Observed Mr(expt) Mr(calc) ppm Start End Miss Ions Peptide**

|           |           |           |        |     |   |     |   |     |                                                                            |
|-----------|-----------|-----------|--------|-----|---|-----|---|-----|----------------------------------------------------------------------------|
| 1452.7712 | 1451.7639 | 1451.7296 | 23.6   | 525 | - | 536 | 0 | --- | R <sub>2</sub> YTPLDYALLGER.H + Acetyl (N-term)                            |
| 1467.8476 | 1466.8403 | 1466.8681 | -18.96 | 28  | - | 41  | 1 | 16  | K.GALQRLIVGNSALR.D                                                         |
| 1504.7627 | 1503.7554 | 1503.7351 | 13.5   | 730 | - | 743 | 1 | --- | R <sub>2</sub> GLPLSTEASRSCK.Q + Acetyl (N-term)                           |
| 1583.8329 | 1582.8256 | 1582.7661 | 37.6   | 111 | - | 123 | 0 | --- | <u>K</u> .DLEEMTPLHLSTR.H + Acetyl (N-term)                                |
| 3016.5633 | 3015.5560 | 3015.4608 | 31.6   | 346 | - | 374 | 1 | --- | <u>K</u> .SDIDINMSDKYGGTALHAAALSGHVSTVK.L + Acetyl (N-term); Oxidation (M) |

**No match to:** 834.4958, 855.3819, 856.5197, 1064.6435, 1192.7265, 1332.7919, 1430.7759, 1454.7674, 1502.7730, 1630.8647, 1725.9813, 1764.9646, 1777.8799, 1779.9264, 1788.9702, 1806.9929, 1844.9402, 1935.0814, 1955.0025, 2086.1738, 3002.5446, 3030.5908

**9. IPI00338570 Mass: 61511 Score: 33 Expect: 29 Matches: 6**

Tax\_Id=10090 Gene\_Symbol=Daam2 Isoform 2 of Disheveled-associated activator of morphogenesis 2

| Observed  | Mr(expt)  | Mr(calc)  | ppm   | Start | End | Miss | Ions | Peptide |                                                                          |
|-----------|-----------|-----------|-------|-------|-----|------|------|---------|--------------------------------------------------------------------------|
| 1504.7627 | 1503.7554 | 1503.6810 | 49.5  | 454   | -   | 464  | 1    | ---     | <u>K</u> .EHMELMSRLER.K + Acetyl (N-term); 2 Oxidation (M)               |
| 1777.8799 | 1776.8726 | 1776.8894 | -9.44 | 52    | -   | 66   | 1    | ---     | R.FAELVDELDTDKNR.E                                                       |
| 1779.9264 | 1778.9191 | 1778.8774 | 23.5  | 236   | -   | 250  | 0    | ---     | K.VLQAMLHYQAYAAER.T + Oxidation (M)                                      |
| 1935.0814 | 1934.0741 | 1934.0699 | 2.17  | 302   | -   | 317  | 1    | ---     | R.YEFLMLGIQPVIDKLR.Q                                                     |
| 3002.5446 | 3001.5373 | 3001.5410 | -1.23 | 391   | -   | 414  | 1    | ---     | R <sub>2</sub> NGGYFQQWQLLDRILQQIVLQDER.G + Acetyl (N-term)              |
| 3030.5908 | 3029.5835 | 3029.5392 | 14.6  | 275   | -   | 301  | 1    | ---     | <u>K</u> .TAIMSFINAVLNAGAGEDNLEFRLHLR.Y + Acetyl (N-term); Oxidation (M) |

**No match to:** 834.4958, 855.3819, 856.5197, 1064.6435, 1192.7265, 1332.7919, 1430.7759, 1452.7712, 1454.7674, 1467.8476, 1502.7730, 1583.8329, 1630.8647, 1725.9813, 1764.9646, 1788.9702, 1806.9929, 1844.9402, 1955.0025, 2086.1738, 3016.5633

**10. IPI00137096 Mass: 15220 Score: 32 Expect: 36 Matches: 4**

Tax\_Id=10090 Gene\_Symbol=4933414I15Rik Putative uncharacterized protein (Fragment)

| Observed  | Mr(expt)  | Mr(calc)  | ppm  | Start | End | Miss | Ions | Peptide |                                                                |
|-----------|-----------|-----------|------|-------|-----|------|------|---------|----------------------------------------------------------------|
| 834.4958  | 833.4886  | 833.4508  | 45.3 | 124   | -   | 129  | 1    | ---     | R <sub>2</sub> FSNIRR.L + Acetyl (N-term)                      |
| 1777.8799 | 1776.8726 | 1776.8393 | 18.8 | 86    | -   | 101  | 0    | ---     | R.DSGFSSPKPMSYFLSK.R                                           |
| 1779.9264 | 1778.9191 | 1778.8444 | 42.0 | 102   | -   | 116  | 1    | ---     | <u>K</u> .RMVTDICISLPPYGGGR.C + Acetyl (N-term); Oxidation (M) |
| 1935.0814 | 1934.0741 | 1933.9832 | 47.0 | 70    | -   | 85   | 1    | ---     | K.VMWIITSQPSFPSRNR.D + Oxidation (M)                           |

**No match to:** 855.3819, 856.5197, 1064.6435, 1192.7265, 1332.7919, 1430.7759, 1452.7712, 1454.7674, 1467.8476, 1502.7730, 1504.7627, 1583.8329, 1630.8647, 1725.9813, 1764.9646, 1788.9702, 1806.9929, 1844.9402, 1955.0025, 2086.1738, 3002.5446, 3016.5633, 3030.5908

**Search Parameters**

**Type of search** : MS/MS Ion Search  
**Enzyme** : Trypsin  
**Fixed modifications** : Carbamidomethyl (C)  
**Variable modifications** : Acetyl (N-term), Oxidation (M)  
**Mass values** : Monoisotopic  
**Protein Mass** : Unrestricted  
**Peptide Mass Tolerance** : ±50 ppm  
**Fragment Mass Tolerance** : ±0.5 Da  
**Max Missed Cleavages** : 1

**Instrument type** : MALDI-TOF-TOF

**Query1 (834.4958,1+)** : <no title>

**Query2 (855.3819,1+)** : <no title>

**Query3 (856.5197,1+)** : <no title>

**Query4 (1064.6435,1+)** : <no title>

**Query5 (1192.7265,1+)** : <no title>

**Query6 (1332.7919,1+)** : <no title>

**Query7 (1430.7759,1+)** : <no title>

**Query8 (1452.7712,1+)** : <no title>

**Query9 (1454.7674,1+)** : <no title>

**Query10 (1467.8476,1+)** : <no title>

**Query11 (1502.7730,1+)** : <no title>

**Query12 (1504.7627,1+)** : <no title>

**Query13 (1583.8329,1+)** : <no title>

**Query14 (1630.8647,1+)** : <no title>

**Query15 (1725.9813,1+)** : <no title>

**Query16 (1764.9646,1+)** : <no title>

**Query17 (1777.8799,1+)** : <no title>

**Query18 (1779.9264,1+)** : <no title>

**Query19 (1788.9702,1+)** : <no title>

**Query20 (1806.9929,1+)** : <no title>

**Query21 (1844.9402,1+)** : <no title>

**Query22 (1935.0814,1+)** : <no title>

**Query23 (1955.0025,1+)** : <no title>

**Query24 (2086.1738,1+)** : <no title>

**Query25 (3002.5446,1+)** : <no title>

**Query26 (3016.5633,1+)** : <no title>

**Query27 (3030.5908,1+)** : <no title>

**Mascot:** <http://www.matrixscience.com/>



# **MASCOT** Mascot Search Results **SCIENCE**

User :  
Email :  
Search title : Auto submitted by BioTools  
Database : SwissProt 57.15 (515203 sequences; 181334896 residues)  
Taxonomy : Mus. (16281 sequences)  
Timestamp : 20 May 2013 at 01:30:40 GMT  
Warning : A Peptide summary report will usually give a much clearer picture of MS/MS search results.  
Top Score : 189 for TPM1\_MOUSE, Tropomyosin alpha-1 chain OS=Mus musculus GN=Tpm1 PE=1 SV=1

## Mascot Score Histogram

Protein score is  $-10 \cdot \log(P)$ , where P is the probability that the observed match is a random event.

Protein scores greater than 55 are significant ( $p < 0.05$ ).

Protein scores are derived from ions scores as a non-probabilistic basis for ranking protein hits.

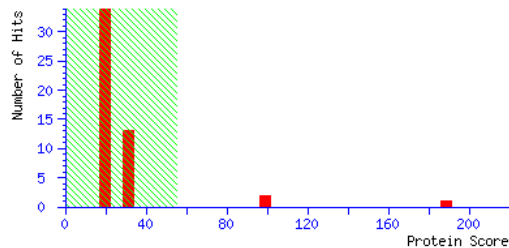

## Protein Summary Report

### Index

| Accession                      | Mass  | Score | Description                                                                                        |
|--------------------------------|-------|-------|----------------------------------------------------------------------------------------------------|
| 1. <a href="#">TPM1_MOUSE</a>  | 32718 | 189   | Tropomyosin alpha-1 chain OS=Mus musculus GN=Tpm1 PE=1 SV=1                                        |
| 2. <a href="#">TPM3_MOUSE</a>  | 32900 | 104   | Tropomyosin alpha-3 chain OS=Mus musculus GN=Tpm3 PE=1 SV=2                                        |
| 3. <a href="#">TPM2_MOUSE</a>  | 32931 | 101   | Tropomyosin beta chain OS=Mus musculus GN=Tpm2 PE=1 SV=1                                           |
| 4. <a href="#">TFB1M_MOUSE</a> | 39222 | 34    | Dimethyladenosine transferase 1, mitochondrial OS=Mus musculus GN=Tfb1m PE=2 SV=1                  |
| 5. <a href="#">DRG2_MOUSE</a>  | 41092 | 34    | Developmentally-regulated GTP-binding protein 2 OS=Mus musculus GN=Drg2 PE=1 SV=1                  |
| 6. <a href="#">FAKD5_MOUSE</a> | 87343 | 33    | FAST kinase domain-containing protein 5 OS=Mus musculus GN=Fastkd5 PE=2 SV=1                       |
| 7. <a href="#">TPM4_MOUSE</a>  | 28564 | 32    | Tropomyosin alpha-4 chain OS=Mus musculus GN=Tpm4 PE=2 SV=3                                        |
| 8. <a href="#">AIPL1_MOUSE</a> | 38678 | 31    | Aryl-hydrocarbon-interacting protein-like 1 OS=Mus musculus GN=Aipl1 PE=2 SV=1                     |
| 9. <a href="#">HIBCH_MOUSE</a> | 43295 | 31    | 3-hydroxyisobutyryl-CoA hydrolase, mitochondrial OS=Mus musculus GN=Hibch PE=1 SV=1                |
| 10. <a href="#">KAP0_MOUSE</a> | 43443 | 30    | cAMP-dependent protein kinase type I-alpha regulatory subunit OS=Mus musculus GN=Prkar1a PE=1 SV=3 |

## Results List

1. [TPM1\\_MOUSE](#) Mass: 32718 Score: 189 Expect: 2e-015 Matches: 5

Tropomyosin alpha-1 chain OS=Mus musculus GN=Tpm1 PE=1 SV=1

**Observed Mr(expt) Mr(calc) ppm Start End Miss Ions Peptide**

1186.7231 1185.7159 1185.6605 46.7 169 - 178 0 --- K.LVIIESDLER.A  
1243.7037 1242.6964 1242.6456 41.0 92 - 101 0 84 R.IQLVEEELDR.A  
1314.8203 1313.8130 1313.7554 43.8 168 - 178 1 86 R.KLVIIESDLER.A  
1671.9058 1670.8985 1670.8839 8.75 169 - 182 1 --- K.LVIIESDLERAEEER.A  
1727.9609 1726.9537 1726.8849 39.8 92 - 105 1 --- R.IQLVEEELDRAQER.L

**No match to:** 806.4246, 894.5205, 898.4999, 915.5359, 926.4952, 938.4736, 988.5624, 1018.5862, 1045.6290, 1174.6813, 1257.7003, 1271.7403, 1275.7345, 1298.7726, 1328.8479, 1346.7135, 1360.7309, 1374.7492, 1385.7668, 1399.8259, 1413.8658, 1431.8366, 1544.8971, 1701.6466, 1723.5980, 1800.0527, 1806.9897, 1820.9320, 1864.9909, 1960.0810

**2. TPM3\_MOUSE Mass: 32900 Score: 104 Expect: 6.5e-007 Matches: 4**

Tropomyosin alpha-3 chain OS=Mus musculus GN=Tpm3 PE=1 SV=2

**Observed Mr(expt) Mr(calc) ppm Start End Miss Ions Peptide**

988.5624 987.5551 987.5171 38.5 126 - 133 1 --- R\_GMKVIENR.A + Acetyl (N-term)  
1243.7037 1242.6964 1242.6456 41.0 92 - 101 0 84 R.IQLVEEELDR.A  
1671.9058 1670.8985 1670.8839 8.74 169 - 182 1 --- K.LVIIIEGDLERTEER.A  
1727.9609 1726.9537 1726.8849 39.8 92 - 105 1 --- R.IQLVEEELDRAQER.L

**No match to:** 806.4246, 894.5205, 898.4999, 915.5359, 926.4952, 938.4736, 1018.5862, 1045.6290, 1174.6813, 1186.7231, 1257.7003, 1271.7403, 1275.7345, 1298.7726, 1314.8203, 1328.8479, 1346.7135, 1360.7309, 1374.7492, 1385.7668, 1399.8259, 1413.8658, 1431.8366, 1544.8971, 1701.6466, 1723.5980, 1800.0527, 1806.9897, 1820.9320, 1864.9909, 1960.0810

**3. TPM2\_MOUSE Mass: 32931 Score: 101 Expect: 1.3e-006 Matches: 5**

Tropomyosin beta chain OS=Mus musculus GN=Tpm2 PE=1 SV=1

**Observed Mr(expt) Mr(calc) ppm Start End Miss Ions Peptide**

988.5624 987.5551 987.5171 38.5 126 - 133 1 --- R\_GMKVIENR.A + Acetyl (N-term)  
1243.7037 1242.6964 1242.6456 41.0 92 - 101 0 84 R.IQLVEEELDR.A  
1298.7726 1297.7653 1297.7605 3.71 168 - 178 1 --- R.KLVILEGELER.S  
1671.9058 1670.8985 1670.8839 8.75 169 - 182 1 --- K.LVILEGELERSEER.A  
1727.9609 1726.9537 1726.8849 39.8 92 - 105 1 --- R.IQLVEEELDRAQER.L

**No match to:** 806.4246, 894.5205, 898.4999, 915.5359, 926.4952, 938.4736, 1018.5862, 1045.6290, 1174.6813, 1186.7231, 1257.7003, 1271.7403, 1275.7345, 1314.8203, 1328.8479, 1346.7135, 1360.7309, 1374.7492, 1385.7668, 1399.8259, 1413.8658, 1431.8366, 1544.8971, 1701.6466, 1723.5980, 1800.0527, 1806.9897, 1820.9320, 1864.9909, 1960.0810

**4. TFB1M\_MOUSE Mass: 39222 Score: 34 Expect: 6.2 Matches: 6**

Dimethyladenosine transferase 1, mitochondrial OS=Mus musculus GN=Tfb1m PE=2 SV=1

**Observed Mr(expt) Mr(calc) ppm Start End Miss Ions Peptide**

926.4952 925.4879 925.4579 32.4 172 - 178 0 --- K\_MTLTFQK.E + Acetyl (N-term); Oxidation (M)  
988.5624 987.5551 987.5753 -20.41 240 - 247 1 --- K.QPFKLVEK.V  
1346.7135 1345.7062 1345.7354 -21.67 32 - 42 0 8 K.QLSQNFLDLR.L  
1360.7309 1359.7236 1359.7358 -8.96 179 - 191 1 --- K.EVAERLVATTGSK.Q  
1413.8658 1412.8586 1412.8140 31.6 105 - 116 1 --- K.LRIVHGDVLTYSK.I  
1431.8366 1430.8293 1430.8860 -39.63 12 - 23 1 --- R\_LPPLPTIREIILK.L + Acetyl (N-term)

**No match to:** 806.4246, 894.5205, 898.4999, 915.5359, 938.4736, 1018.5862, 1045.6290, 1174.6813, 1186.7231, 1243.7037, 1257.7003, 1271.7403, 1275.7345, 1298.7726, 1314.8203, 1328.8479, 1374.7492, 1385.7668, 1399.8259, 1544.8971, 1671.9058, 1701.6466, 1723.5980, 1727.9609, 1800.0527, 1806.9897, 1820.9320, 1864.9909, 1960.0810

**5. DRG2\_MOUSE Mass: 41092 Score: 34 Expect: 6.6 Matches: 7**

Developmentally-regulated GTP-binding protein 2 OS=Mus musculus GN=Drg2 PE=1 SV=1

**Observed Mr(expt) Mr(calc) ppm Start End Miss Ions Peptide**

1186.7231 1185.7159 1185.6618 45.6 322 - 331 1 --- R\_IHRSLASQFK.Y  
 1257.7003 1256.6930 1256.7088 -12.60 162 - 172 1 --- K\_ELESVGIRLNK.H  
 1271.7403 1270.7330 1270.7186 11.4 173 - 182 0 --- K\_HKPNIYFKPK.K  
 1385.7668 1384.7595 1384.7714 -8.61 22 - 33 1 --- K\_ATEYHLGLLKAK.L + Acetyl (N-term)  
 1399.8259 1398.8186 1398.8136 3.60 173 - 183 1 --- K\_HKPNIYFKPKK.G  
 1431.8366 1430.8293 1430.7690 42.2 1 - 12 1 --- \_MGILEKISEIEK.E + Acetyl (N-term)  
 1671.9058 1670.8985 1670.9104 -7.12 298 - 311 1 --- R\_GQRPDFTDAILRK.G + Acetyl (N-term)

**No match to:** 806.4246, 894.5205, 898.4999, 915.5359, 926.4952, 938.4736, 988.5624, 1018.5862, 1045.6290, 1174.6813, 1243.7037, 1275.7345, 1298.7726, 1314.8203, 1328.8479, 1346.7135, 1360.7309, 1374.7492, 1413.8658, 1544.8971, 1701.6466, 1723.5980, 1727.9609, 1800.0527, 1806.9897, 1820.9320, 1864.9909, 1960.0810

**6. FAKD5\_MOUSE Mass: 87343 Score: 33 Expect: 7.8 Matches: 9**

FAST kinase domain-containing protein 5 OS=Mus musculus GN=Fastkd5 PE=2 SV=1

**Observed Mr(expt) Mr(calc) ppm Start End Miss Ions Peptide**

894.5205 893.5132 893.4858 30.6 505 - 511 1 --- R\_SKFELTK.E + Acetyl (N-term)  
 915.5359 914.5287 914.4861 46.5 750 - 756 0 --- K\_LAYLHEK.V + Acetyl (N-term)  
 1018.5862 1017.5789 1017.5607 17.9 722 - 729 0 --- R\_QLVQIGYR.V + Acetyl (N-term)  
 1045.6290 1044.6217 1044.6219 -0.20 7 - 14 1 --- K\_LLEPLKYK.A + Acetyl (N-term)  
 1174.6813 1173.6740 1173.6618 10.4 721 - 729 1 --- R\_RQLVQIGYR.V + Acetyl (N-term)  
 1243.7037 1242.6964 1242.6972 -0.59 747 - 756 1 --- R\_LEKLAYLHEK.V  
 1820.9320 1819.9247 1819.9217 1.67 67 - 82 1 --- R\_RTFTASSAHLGLEFNK.A + Acetyl (N-term)  
 1864.9909 1863.9836 1863.9560 14.8 409 - 425 1 --- R\_VMNAVAASLPPRVAHCR.S + Oxidation (M)  
 1960.0810 1959.0737 1959.0195 27.6 260 - 273 1 --- R\_FFKIFFSYLNLHWR.E + Acetyl (N-term)

**No match to:** 806.4246, 898.4999, 926.4952, 938.4736, 988.5624, 1186.7231, 1257.7003, 1271.7403, 1275.7345, 1298.7726, 1314.8203, 1328.8479, 1346.7135, 1360.7309, 1374.7492, 1385.7668, 1399.8259, 1413.8658, 1431.8366, 1544.8971, 1671.9058, 1701.6466, 1723.5980, 1727.9609, 1800.0527, 1806.9897

**7. TPM4\_MOUSE Mass: 28564 Score: 32 Expect: 9.4 Matches: 4**

Tropomyosin alpha-4 chain OS=Mus musculus GN=Tpm4 PE=2 SV=3

**Observed Mr(expt) Mr(calc) ppm Start End Miss Ions Peptide**

988.5624 987.5551 987.5171 38.5 90 - 97 1 --- R\_GMKVIENR.A + Acetyl (N-term)  
 1257.7003 1256.6930 1256.6612 25.3 56 - 65 0 19 R\_IQLLEEELDR.A  
 1346.7135 1345.7062 1345.7023 2.88 1 - 12 1 --- \_MAGLNSLEAVKR.K + Acetyl (N-term); Oxidation (M)  
 1374.7492 1373.7419 1373.6926 36.0 213 - 223 1 --- K\_LEKTIDDLLEEK.L + Acetyl (N-term)

**No match to:** 806.4246, 894.5205, 898.4999, 915.5359, 926.4952, 938.4736, 1018.5862, 1045.6290, 1174.6813, 1186.7231, 1243.7037, 1271.7403, 1275.7345, 1298.7726, 1314.8203, 1328.8479, 1360.7309, 1385.7668, 1399.8259, 1413.8658, 1431.8366, 1544.8971, 1671.9058,

1701.6466, 1723.5980, 1727.9609, 1800.0527, 1806.9897, 1820.9320, 1864.9909, 1960.0810

8. AIPL1\_MOUSE Mass: 38678 Score: 31 Expect: 13 Matches: 6

Aryl-hydrocarbon-interacting protein-like 1 OS=Mus musculus GN=Aipl1 PE=2 SV=1

**Observed Mr(expt) Mr(calc) ppm Start End Miss Ions Peptide**

806.4246 805.4174 805.4235 -7.64 33 - 38 0 --- R.VTFHFR.T  
1243.7037 1242.6964 1242.6642 26.0 290 - 299 1 --- K.VLELEPSMRK.A + Acetyl (N-term)  
1385.7668 1384.7595 1384.7027 41.0 215 - 224 0 --- K.EKPWEVEWLK.L + Acetyl (N-term)  
1413.8658 1412.8586 1412.8239 24.6 2 - 14 1 --- M.DVSLLLNVGVK.T  
1544.8971 1543.8899 1543.8643 16.5 1 - 14 1 --- -.MDVSLLLNVGVK.T  
1671.9058 1670.8985 1670.8549 26.1 285 - 298 1 --- K.ADLEKVLELEPSMR.K + Acetyl (N-term)

**No match to:** 894.5205, 898.4999, 915.5359, 926.4952, 938.4736, 988.5624, 1018.5862, 1045.6290, 1174.6813, 1186.7231, 1257.7003, 1271.7403, 1275.7345, 1298.7726, 1314.8203, 1328.8479, 1346.7135, 1360.7309, 1374.7492, 1399.8259, 1431.8366, 1701.6466, 1723.5980, 1727.9609, 1800.0527, 1806.9897, 1820.9320, 1864.9909, 1960.0810

9. HIBCH\_MOUSE Mass: 43295 Score: 31 Expect: 13 Matches: 7

3-hydroxyisobutyryl-CoA hydrolase, mitochondrial OS=Mus musculus GN=Hibch PE=1 SV=1

**Observed Mr(expt) Mr(calc) ppm Start End Miss Ions Peptide**

806.4246 805.4174 805.4181 -0.95 377 - 384 0 --- K.SLGSSDLK.F  
898.4999 897.4926 897.5072 -16.23 358 - 364 0 --- K.WKPANLK.D + Acetyl (N-term)  
938.4736 937.4663 937.4328 35.8 92 - 100 0 --- K.AFCAGGDIK.A  
1271.7403 1270.7330 1270.6816 40.5 43 - 54 0 --- R.GCGGVITLNRPK.F  
1275.7345 1274.7272 1274.6904 28.9 297 - 307 1 --- K.VINKMSPTSLK.I + Acetyl (N-term); Oxidation (M)  
1346.7135 1345.7062 1345.7255 -14.31 2 - 12 1 0 M.GQPYAWRLLSR.V  
1820.9320 1819.9247 1819.9138 5.99 285 - 300 1 --- R.QDGSFAIEQMKVINK.M + Oxidation (M)

**No match to:** 894.5205, 915.5359, 926.4952, 988.5624, 1018.5862, 1045.6290, 1174.6813, 1186.7231, 1243.7037, 1257.7003, 1298.7726, 1314.8203, 1328.8479, 1360.7309, 1374.7492, 1385.7668, 1399.8259, 1413.8658, 1431.8366, 1544.8971, 1671.9058, 1701.6466, 1723.5980, 1727.9609, 1800.0527, 1806.9897, 1864.9909, 1960.0810

10. KAP0\_MOUSE Mass: 43443 Score: 30 Expect: 16 Matches: 4

cAMP-dependent protein kinase type I-alpha regulatory subunit OS=Mus musculus GN=Prkar1a PE=1 SV=3

**Observed Mr(expt) Mr(calc) ppm Start End Miss Ions Peptide**

1018.5862 1017.5789 1017.6005 -21.19 234 - 242 1 --- R.ILMGSTLRK.R  
1045.6290 1044.6217 1044.5703 49.2 253 - 261 0 --- K.VSILESLDK.W + Acetyl (N-term)  
1243.7037 1242.6964 1242.6721 19.6 219 - 228 1 8 K.TNVKLWGIDR.D + Acetyl (N-term)  
1257.7003 1256.6930 1256.6911 1.51 358 - 368 1 8 R.VLGPCSDILK.R.N

**No match to:** 806.4246, 894.5205, 898.4999, 915.5359, 926.4952, 938.4736, 988.5624, 1174.6813, 1186.7231, 1271.7403, 1275.7345, 1298.7726, 1314.8203, 1328.8479, 1346.7135, 1360.7309, 1374.7492, 1385.7668, 1399.8259, 1413.8658, 1431.8366, 1544.8971, 1671.9058, 1701.6466, 1723.5980, 1727.9609, 1800.0527, 1806.9897, 1820.9320, 1864.9909, 1960.0810

**Search Parameters**

Type of search : MS/MS Ion Search

Enzyme : Trypsin

**Fixed modifications** : Carbamidomethyl (C)  
**Variable modifications** : Acetyl (N-term), Oxidation (M)  
**Mass values** : Monoisotopic  
**Protein Mass** : Unrestricted  
**Peptide Mass Tolerance** :  $\pm 50$  ppm  
**Fragment Mass Tolerance**:  $\pm 0.5$  Da  
**Max Missed Cleavages** : 1  
**Instrument type** : MALDI-TOF-TOF  
**Query1 (806.4246,1+)** : <no title>  
**Query2 (894.5205,1+)** : <no title>  
**Query3 (898.4999,1+)** : <no title>  
**Query4 (915.5359,1+)** : <no title>  
**Query5 (926.4952,1+)** : <no title>  
**Query6 (938.4736,1+)** : <no title>  
**Query7 (988.5624,1+)** : <no title>  
**Query8 (1018.5862,1+)** : <no title>  
**Query9 (1045.6290,1+)** : <no title>  
**Query10 (1174.6813,1+)** : <no title>  
**Query11 (1186.7231,1+)** : <no title>  
**Query12 (1243.7037,1+)** : <no title>  
**Query13 (1257.7003,1+)** : <no title>  
**Query14 (1271.7403,1+)** : <no title>  
**Query15 (1275.7345,1+)** : <no title>  
**Query16 (1298.7726,1+)** : <no title>  
**Query17 (1314.8203,1+)** : <no title>  
**Query18 (1328.8479,1+)** : <no title>  
**Query19 (1346.7135,1+)** : <no title>  
**Query20 (1360.7309,1+)** : <no title>  
**Query21 (1374.7492,1+)** : <no title>  
**Query22 (1385.7668,1+)** : <no title>  
**Query23 (1399.8259,1+)** : <no title>  
**Query24 (1413.8658,1+)** : <no title>  
**Query25 (1431.8366,1+)** : <no title>  
**Query26 (1544.8971,1+)** : <no title>  
**Query27 (1671.9058,1+)** : <no title>  
**Query28 (1701.6466,1+)** : <no title>  
**Query29 (1723.5980,1+)** : <no title>  
**Query30 (1727.9609,1+)** : <no title>  
**Query31 (1800.0527,1+)** : <no title>  
**Query32 (1806.9897,1+)** : <no title>  
**Query33 (1820.9320,1+)** : <no title>  
**Query34 (1864.9909,1+)** : <no title>  
**Query35 (1960.0810,1+)** : <no title>



# **MASCOT** Mascot Search Results **SCIENCE**

**User** :  
**Email** :  
**Search title** : Auto submitted by BioTools  
**Database** : SwissProt 57.15 (515203 sequences; 181334896 residues)  
**Taxonomy** : Mus musculus (house mouse) (16230 sequences)  
**Timestamp** : 20 Jun 2013 at 07:30:43 GMT  
**Warning** : A Peptide summary report will usually give a much clearer picture of MS/MS search results.  
**Top Score** : 168 for SAMP\_MOUSE, Serum amyloid P-component OS=Mus musculus GN=Apcs PE=1 SV=2

## Mascot Score Histogram

Protein score is  $-10 \cdot \log(P)$ , where P is the probability that the observed match is a random event.

Protein scores greater than 55 are significant ( $p < 0.05$ ).

Protein scores are derived from ions scores as a non-probabilistic basis for ranking protein hits.

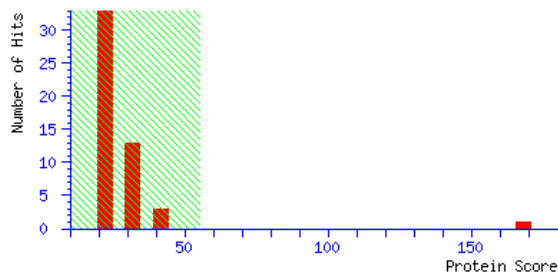

## Protein Summary Report

### Index

| Accession                      | Mass   | Score | Description                                                               |
|--------------------------------|--------|-------|---------------------------------------------------------------------------|
| 1. <a href="#">SAMP_MOUSE</a>  | 26401  | 168   | Serum amyloid P-component OS=Mus musculus GN=Apcs PE=1 SV=2               |
| 2. <a href="#">EPHA2_MOUSE</a> | 110236 | 44    | Ephrin type-A receptor 2 OS=Mus musculus GN=Epha2 PE=1 SV=2               |
| 3. <a href="#">MTPN_MOUSE</a>  | 13024  | 43    | Myotrophin OS=Mus musculus GN=Mtpn PE=2 SV=2                              |
| 4. <a href="#">KLH38_MOUSE</a> | 66577  | 38    | Kelch-like protein 38 OS=Mus musculus GN=Klh38 PE=2 SV=1                  |
| 5. <a href="#">H12_MOUSE</a>   | 21254  | 35    | Histone H1.2 OS=Mus musculus GN=Hist1h1c PE=1 SV=2                        |
| 6. <a href="#">TTL1_MOUSE</a>  | 49478  | 34    | Probable tubulin polyglutamylase TTL1 OS=Mus musculus GN=Ttl1 PE=1 SV=1   |
| 7. <a href="#">PHB_MOUSE</a>   | 29859  | 31    | Prohibitin OS=Mus musculus GN=Phb PE=1 SV=1                               |
| 8. <a href="#">UBE2K_MOUSE</a> | 22507  | 31    | Ubiquitin-conjugating enzyme E2 K OS=Mus musculus GN=Ube2k PE=2 SV=3      |
| 9. <a href="#">PDIA3_MOUSE</a> | 57099  | 30    | Protein disulfide-isomerase A3 OS=Mus musculus GN=Pdia3 PE=1 SV=2         |
| 10. <a href="#">BAI1_MOUSE</a> | 176664 | 30    | Brain-specific angiogenesis inhibitor 1 OS=Mus musculus GN=Bai1 PE=1 SV=1 |

### Results List

1. [SAMP\\_MOUSE](#) Mass: 26401 Score: 168 Expect: 2.6e-013 Matches: 4

Serum amyloid P-component OS=Mus musculus GN=Apcs PE=1 SV=2

**Observed Mr(expt) Mr(calc) ppm Start End Miss Ions Peptide**

892.5088 891.5016 891.5331 -35.34 27 - 33 1 --- R.KVVFVPR.E  
1220.6336 1219.6263 1219.6561 -24.37 76 - 85 1 19 K.GRDNELLYK.E  
1343.6510 1342.6437 1342.6769 -24.69 88 - 99 0 --- K.VGEYSLYIGQSK.V  
2133.0149 2132.0076 2132.0287 -9.88 147 - 166 0 116 K.APPSIVLGQEIQDNYGGGFQR.S

**No match to:** 856.5027, 917.5335, 924.4977, 982.5669, 995.5929, 1011.5950, 1147.5963, 1148.6080, 1150.5386, 1178.5773, 1185.6246, 1198.6361, 1235.6174, 1302.6634, 1338.7552, 1365.6472, 1367.6442, 1373.7315, 1427.6598, 1460.6511, 1486.7732, 1494.7413, 1606.8160, 1613.7661, 1682.7602, 1871.8721, 1959.9125, 1998.0530, 2117.4501, 2118.4078, 2147.0160, 2170.9748, 2225.0771, 2247.0610

2. EPHA2\_MOUSE Mass: 110236 Score: 44 Expect: 0.68 Matches: 6

Ephrin type-A receptor 2 OS=Mus musculus GN=Epha2 PE=1 SV=2

**Observed Mr(expt) Mr(calc) ppm Start End Miss Ions Peptide**

917.5335 916.5262 916.5164 10.7 168 - 175 1 --- R.MVGPLTRK.G + Oxidation (M)  
1178.5773 1177.5700 1177.5649 4.37 937 - 946 0 --- K.VVQMSNEDIK.R + Oxidation (M)  
1220.6336 1219.6263 1219.5689 47.1 200 - 209 0 20 K.CPEMLQSLAR.F + Oxidation (M)  
1235.6174 1234.6101 1234.6631 -42.91 27 - 37 0 --- K.EVVLLDFAAMK.G  
1682.7602 1681.7530 1681.7683 -9.10 764 - 779 0 --- R.VLEDDPEATYTTSGGK.I  
2147.0160 2146.0088 2146.0148 -2.82 686 - 703 0 --- K.YKPMMIITEYMENGALDK.F

**No match to:** 856.5027, 892.5088, 924.4977, 982.5669, 995.5929, 1011.5950, 1147.5963, 1148.6080, 1150.5386, 1185.6246, 1198.6361, 1302.6634, 1338.7552, 1343.6510, 1365.6472, 1367.6442, 1373.7315, 1427.6598, 1460.6511, 1486.7732, 1494.7413, 1606.8160, 1613.7661, 1871.8721, 1959.9125, 1998.0530, 2117.4501, 2118.4078, 2133.0149, 2170.9748, 2225.0771, 2247.0610

3. MTPN\_MOUSE Mass: 13024 Score: 43 Expect: 0.85 Matches: 4

Myotrophin OS=Mus musculus GN=Mtpn PE=2 SV=2

**Observed Mr(expt) Mr(calc) ppm Start End Miss Ions Peptide**

924.4977 923.4905 923.4575 35.7 5 - 11 0 --- K.EFMWALK.N  
1302.6634 1301.6561 1301.6324 18.2 25 - 36 1 --- K.GEDVNRTLEGGR.K  
1343.6510 1342.6437 1342.6050 28.9 2 - 11 1 --- M.CDKEFMWALK.N + Oxidation (M)  
2147.0160 2146.0088 2146.0994 -42.21 67 - 85 0 --- K.HHITPLLSAVYEGHVSCVK.L

**No match to:** 856.5027, 892.5088, 917.5335, 982.5669, 995.5929, 1011.5950, 1147.5963, 1148.6080, 1150.5386, 1178.5773, 1185.6246, 1198.6361, 1220.6336, 1235.6174, 1338.7552, 1365.6472, 1367.6442, 1373.7315, 1427.6598, 1460.6511, 1486.7732, 1494.7413, 1606.8160, 1613.7661, 1682.7602, 1871.8721, 1959.9125, 1998.0530, 2117.4501, 2118.4078, 2133.0149, 2170.9748, 2225.0771, 2247.0610

4. KLH38\_MOUSE Mass: 66577 Score: 38 Expect: 2.3 Matches: 7

Kelch-like protein 38 OS=Mus musculus GN=Klh38 PE=2 SV=1

**Observed Mr(expt) Mr(calc) ppm Start End Miss Ions Peptide**

924.4977 923.4905 923.4568 36.4 462 - 468 1 --- K.METRMILK.N + Oxidation (M)  
1148.6080 1147.6007 1147.5873 11.7 491 - 500 0 --- R.ILAYDPQSNK.F  
1185.6246 1184.6173 1184.6077 8.12 50 - 60 0 --- R.SVLASSPYFK.A  
1427.6598 1426.6525 1426.6234 20.4 61 - 71 1 --- K.AMFCSHFRESRE  
1486.7732 1485.7660 1485.7510 10.0 365 - 377 1 --- R.VGEPMLAARYSHR.S  
1613.7661 1612.7589 1612.7555 2.06 258 - 271 0 --- K.QIFSLYGPSAQDCK.L



1871.8721 1870.8648 1870.8189 24.5 174 - 188 1 --- K.ELCAMELRDYLGDDDR.L + Oxidation (M)

**No match to:** 856.5027, 892.5088, 917.5335, 982.5669, 995.5929, 1011.5950, 1147.5963, 1150.5386, 1178.5773, 1198.6361, 1220.6336, 1235.6174, 1302.6634, 1338.7552, 1343.6510, 1365.6472, 1367.6442, 1373.7315, 1460.6511, 1494.7413, 1606.8160, 1682.7602, 1959.9125, 1998.0530, 2117.4501, 2118.4078, 2133.0149, 2147.0160, 2170.9748, 2225.0771, 2247.0610

5. H12\_MOUSE Mass: 21254 Score: 35 Expect: 5.4 Matches: 5

Histone H1.2 OS=Mus musculus GN=Hist1h1c PE=1 SV=2

| Observed  | Mr(expt)  | Mr(calc)  | ppm    | Start | End | Miss | Ions  | Peptide          |
|-----------|-----------|-----------|--------|-------|-----|------|-------|------------------|
| 856.5027  | 855.4954  | 855.5178  | -26.17 | 160   | -   | 168  | 0 --- | K.KPAAAVTK.K     |
| 995.5929  | 994.5856  | 994.6287  | -43.33 | 130   | -   | 139  | 1 --- | K.KPAGAAKKPK.K   |
| 1185.6246 | 1184.6173 | 1184.6513 | -28.66 | 111   | -   | 122  | 1 --- | K.AASGEAKPQAKK.A |
| 1198.6361 | 1197.6289 | 1197.6605 | -26.42 | 35    | -   | 46   | 0 --- | K.ASGPPVSELITK.A |
| 1235.6174 | 1234.6101 | 1234.6557 | -36.91 | 64    | -   | 75   | 1 --- | K.KALAAAGYDVEK.N |

**No match to:** 892.5088, 917.5335, 924.4977, 982.5669, 1011.5950, 1147.5963, 1148.6080, 1150.5386, 1178.5773, 1220.6336, 1302.6634, 1338.7552, 1343.6510, 1365.6472, 1367.6442, 1373.7315, 1427.6598, 1460.6511, 1486.7732, 1494.7413, 1606.8160, 1613.7661, 1682.7602, 1871.8721, 1959.9125, 1998.0530, 2117.4501, 2118.4078, 2133.0149, 2147.0160, 2170.9748, 2225.0771, 2247.0610

6. TTL1\_MOUSE Mass: 49478 Score: 34 Expect: 7.1 Matches: 5

Probable tubulin polyglutamylase TTL1 OS=Mus musculus GN=Ttl1 PE=1 SV=1

| Observed  | Mr(expt)  | Mr(calc)  | ppm    | Start | End | Miss | Ions  | Peptide                          |
|-----------|-----------|-----------|--------|-------|-----|------|-------|----------------------------------|
| 856.5027  | 855.4954  | 855.4603  | 41.1   | 366   | -   | 372  | 1 --- | K.WNKSPPE                        |
| 1494.7413 | 1493.7340 | 1493.7007 | 22.3   | 130   | -   | 142  | 0 --- | K.SPSSWIMKPCGK.A + Oxidation (M) |
| 1606.8160 | 1605.8087 | 1605.8007 | 5.01   | 129   | -   | 142  | 1 --- | R.KSPSSWIMKPCGK.A                |
| 2225.0771 | 2224.0698 | 2224.1537 | -37.71 | 199   | -   | 215  | 1 --- | R.LYVLVSTYRPLRCYMYK.L            |
| 2247.0610 | 2246.0537 | 2246.0729 | -8.56  | 248   | -   | 266  | 1 --- | K.HGEDYNHIIHGKWTVNNLR.L          |

**No match to:** 892.5088, 917.5335, 924.4977, 982.5669, 995.5929, 1011.5950, 1147.5963, 1148.6080, 1150.5386, 1178.5773, 1185.6246, 1198.6361, 1220.6336, 1235.6174, 1302.6634, 1338.7552, 1343.6510, 1365.6472, 1367.6442, 1373.7315, 1427.6598, 1460.6511, 1486.7732, 1613.7661, 1682.7602, 1871.8721, 1959.9125, 1998.0530, 2117.4501, 2118.4078, 2133.0149, 2147.0160, 2170.9748

7. PHB\_MOUSE Mass: 29859 Score: 31 Expect: 13 Matches: 4

Prohibitin OS=Mus musculus GN=Phb PE=1 SV=1

| Observed  | Mr(expt)  | Mr(calc)  | ppm    | Start | End | Miss | Ions  | Peptide                  |
|-----------|-----------|-----------|--------|-------|-----|------|-------|--------------------------|
| 1185.6246 | 1184.6173 | 1184.6513 | -28.68 | 84    | -   | 93   | 0 --- | K.DLQNVNITLR.I           |
| 1460.6511 | 1459.6438 | 1459.6467 | -1.98  | 106   | -   | 117  | 0 --- | R.IYTSIGEDYDER.V         |
| 1606.8160 | 1605.8087 | 1605.8362 | -17.08 | 240   | -   | 253  | 1 --- | R.KLEAAEDIAYQLSR.S       |
| 1998.0530 | 1997.0458 | 1997.0793 | -16.78 | 220   | -   | 239  | 0 --- | K.AAELIANSLATAGDGLIELR.K |

**No match to:** 856.5027, 892.5088, 917.5335, 924.4977, 982.5669, 995.5929, 1011.5950, 1147.5963, 1148.6080, 1150.5386, 1178.5773, 1198.6361, 1220.6336, 1235.6174, 1302.6634, 1338.7552, 1343.6510, 1365.6472, 1367.6442, 1373.7315, 1427.6598, 1486.7732, 1494.7413, 1613.7661, 1682.7602, 1871.8721, 1959.9125, 2117.4501, 2118.4078, 2133.0149, 2147.0160, 2170.9748, 2225.0771, 2247.0610

8. UBE2K\_MOUSE Mass: 22507 Score: 31 Expect: 13 Matches: 4

Ubiquitin-conjugating enzyme E2 K OS=Mus musculus GN=Ube2k PE=2 SV=3

| Observed | Mr(expt) | Mr(calc) | ppm | Start | End | Miss | Ions | Peptide |
|----------|----------|----------|-----|-------|-----|------|------|---------|
|----------|----------|----------|-----|-------|-----|------|------|---------|

892.5088 891.5016 891.5065 -5.59 12 - 18 1 --- R.EFKEVLK.S  
 1178.5773 1177.5700 1177.5550 12.8 98 - 107 0 --- K.DQWAAAMTLRT + Oxidation (M)  
 1302.6634 1301.6561 1301.6656 -7.27 62 - 72 0 --- K.IPEYYPFNPPK.V  
 1365.6472 1364.6400 1364.6507 -7.85 136 - 146 1 --- K.QNPEMFKQTFAR.L + Oxidation (M)  
**No match to:** 856.5027, 917.5335, 924.4977, 982.5669, 995.5929, 1011.5950, 1147.5963, 1148.6080, 1150.5386, 1185.6246, 1198.6361,  
 1220.6336, 1235.6174, 1338.7552, 1343.6510, 1367.6442, 1373.7315, 1427.6598, 1460.6511, 1486.7732, 1494.7413, 1606.8160, 1613.7661,  
 1682.7602, 1871.8721, 1959.9125, 1998.0530, 2117.4501, 2118.4078, 2133.0149, 2147.0160, 2170.9748, 2225.0771, 2247.0610

**9. PDIA3\_MOUSE Mass: 57099 Score: 30 Expect: 15 Matches: 3**

Protein disulfide-isomerase A3 OS=Mus musculus GN=Pdia3 PE=1 SV=2

| Observed  | Mr(expt)  | Mr(calc)  | ppm    | Start | End | Miss | Ions | Peptide              |
|-----------|-----------|-----------|--------|-------|-----|------|------|----------------------|
| 995.5929  | 994.5856  | 994.5560  | 29.8   | 131   | 140 | 0    | 17   | K.QAGPASVPLR.T       |
| 1486.7732 | 1485.7660 | 1485.6922 | 49.6   | 333   | 344 | 1    | ---  | K.GEKFVMQEEFSR.D     |
| 1959.9125 | 1958.9052 | 1958.9486 | -22.14 | 467   | 482 | 1    | ---  | K.YEGGRELNDFISYLQR.E |

**No match to:** 856.5027, 892.5088, 917.5335, 924.4977, 982.5669, 1011.5950, 1147.5963, 1148.6080, 1150.5386, 1178.5773, 1185.6246,  
 1198.6361, 1220.6336, 1235.6174, 1302.6634, 1338.7552, 1343.6510, 1365.6472, 1367.6442, 1373.7315, 1427.6598, 1460.6511, 1494.7413,  
 1606.8160, 1613.7661, 1682.7602, 1871.8721, 1998.0530, 2117.4501, 2118.4078, 2133.0149, 2147.0160, 2170.9748, 2225.0771, 2247.0610

**10. BAI1\_MOUSE Mass: 176664 Score: 30 Expect: 16 Matches: 9**

Brain-specific angiogenesis inhibitor 1 OS=Mus musculus GN=Bai1 PE=1 SV=1

| Observed  | Mr(expt)  | Mr(calc)  | ppm    | Start | End  | Miss | Ions | Peptide                          |
|-----------|-----------|-----------|--------|-------|------|------|------|----------------------------------|
| 917.5335  | 916.5262  | 916.4879  | 41.8   | 1527  | 1533 | 1    | ---  | K.RAWESLR.K                      |
| 924.4977  | 923.4905  | 923.5188  | -30.72 | 1500  | 1507 | 1    | ---  | R.KLQHAAEK.E                     |
| 1147.5963 | 1146.5890 | 1146.5570 | 27.9   | 790   | 799  | 1    | ---  | K.GWRATGDWAK.V                   |
| 1148.6080 | 1147.6007 | 1147.5444 | 49.1   | 192   | 201  | 0    | ---  | R.WLDACLAGSR.S                   |
| 1185.6246 | 1184.6173 | 1184.5714 | 38.8   | 1315  | 1325 | 0    | ---  | K.SSFIGDGDIFK.K                  |
| 1220.6336 | 1219.6263 | 1219.5728 | 43.9   | 276   | 286  | 1    | ---  | R.DCGGGLQTRTR.T                  |
| 1343.6510 | 1342.6437 | 1342.6914 | -35.54 | 1255  | 1265 | 1    | ---  | K.RPSLPPEEKMK.L                  |
| 1460.6511 | 1459.6438 | 1459.6119 | 21.9   | 180   | 191  | 0    | ---  | R.NPSHAACQMLCR.W + Oxidation (M) |
| 2225.0771 | 2224.0698 | 2224.0146 | 24.8   | 616   | 633  | 0    | ---  | R.CELDEEGIAFWEPPTYIR.C           |

**No match to:** 856.5027, 892.5088, 982.5669, 995.5929, 1011.5950, 1150.5386, 1178.5773, 1198.6361, 1235.6174, 1302.6634, 1338.7552,  
 1365.6472, 1367.6442, 1373.7315, 1427.6598, 1486.7732, 1494.7413, 1606.8160, 1613.7661, 1682.7602, 1871.8721, 1959.9125, 1998.0530,  
 2117.4501, 2118.4078, 2133.0149, 2147.0160, 2170.9748, 2247.0610

**Search Parameters**

**Type of search** : MS/MS Ion Search  
**Enzyme** : Trypsin  
**Fixed modifications** : Carbamidomethyl (C)  
**Variable modifications** : Oxidation (M)  
**Mass values** : Monoisotopic  
**Protein Mass** : Unrestricted  
**Peptide Mass Tolerance** : ±50 ppm  
**Fragment Mass Tolerance** : ±0.6 Da

Max Missed Cleavages : 1  
Instrument type : MALDI-TOF-TOF  
Query1 (856.5027,1+) : <no title>  
Query2 (892.5088,1+) : <no title>  
Query3 (917.5335,1+) : <no title>  
Query4 (924.4977,1+) : <no title>  
Query5 (982.5669,1+) : <no title>  
Query6 (995.5929,1+) : <no title>  
Query7 (1011.5950,1+) : <no title>  
Query8 (1147.5963,1+) : <no title>  
Query9 (1148.6080,1+) : <no title>  
Query10 (1150.5386,1+) : <no title>  
Query11 (1178.5773,1+) : <no title>  
Query12 (1185.6246,1+) : <no title>  
Query13 (1198.6361,1+) : <no title>  
Query14 (1220.6336,1+) : <no title>  
Query15 (1235.6174,1+) : <no title>  
Query16 (1302.6634,1+) : <no title>  
Query17 (1338.7552,1+) : <no title>  
Query18 (1343.6510,1+) : <no title>  
Query19 (1365.6472,1+) : <no title>  
Query20 (1367.6442,1+) : <no title>  
Query21 (1373.7315,1+) : <no title>  
Query22 (1427.6598,1+) : <no title>  
Query23 (1460.6511,1+) : <no title>  
Query24 (1486.7732,1+) : <no title>  
Query25 (1494.7413,1+) : <no title>  
Query26 (1606.8160,1+) : <no title>  
Query27 (1613.7661,1+) : <no title>  
Query28 (1682.7602,1+) : <no title>  
Query29 (1871.8721,1+) : <no title>  
Query30 (1959.9125,1+) : <no title>  
Query31 (1998.0530,1+) : <no title>  
Query32 (2117.4501,1+) : <no title>  
Query33 (2118.4078,1+) : <no title>  
Query34 (2133.0149,1+) : <no title>  
Query35 (2147.0160,1+) : <no title>  
Query36 (2170.9748,1+) : <no title>  
Query37 (2225.0771,1+) : <no title>  
Query38 (2247.0610,1+) : <no title>

Mascot: <http://www.matrixscience.com/>



# **MASCOT** Mascot Search Results **SCIENCE**

User :  
Email :  
Search title : Auto submitted by BioTools  
Database : SwissProt 57.15 (515203 sequences; 181334896 residues)  
Taxonomy : Mus musculus (house mouse) (16230 sequences)  
Timestamp : 20 Jun 2013 at 07:30:34 GMT  
Warning : A Peptide summary report will usually give a much clearer picture of MS/MS search results.  
Top Score : 170 for MYL6\_MOUSE, Myosin light polypeptide 6 OS=Mus musculus GN=Myl6 PE=1 SV=3

## Mascot Score Histogram

Protein score is  $-10 \cdot \log(P)$ , where P is the probability that the observed match is a random event.

Protein scores greater than 55 are significant ( $p < 0.05$ ).

Protein scores are derived from ions scores as a non-probabilistic basis for ranking protein hits.

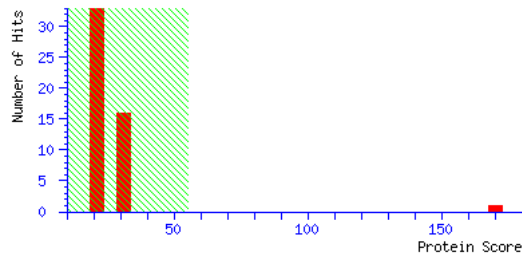

## Protein Summary Report

### Index

| Accession                       | Mass   | Score | Description                                                                             |
|---------------------------------|--------|-------|-----------------------------------------------------------------------------------------|
| 1. <a href="#">MYL6_MOUSE</a>   | 17090  | 170   | Myosin light polypeptide 6 OS=Mus musculus GN=Myl6 PE=1 SV=3                            |
| 2. <a href="#">CBLB_MOUSE</a>   | 110535 | 36    | E3 ubiquitin-protein ligase CBL-B OS=Mus musculus GN=Cblb PE=1 SV=2                     |
| 3. <a href="#">DNS2B_MOUSE</a>  | 41281  | 34    | Deoxyribonuclease-2-beta OS=Mus musculus GN=Dnase2b PE=2 SV=1                           |
| 4. <a href="#">SETX_MOUSE</a>   | 301621 | 33    | Probable helicase senataxin OS=Mus musculus GN=Setx PE=2 SV=1                           |
| 5. <a href="#">KCNB1_MOUSE</a>  | 96487  | 32    | Potassium voltage-gated channel subfamily B member 1 OS=Mus musculus GN=Kcnb1 PE=1 SV=1 |
| 6. <a href="#">SOSD1_MOUSE</a>  | 23730  | 32    | Sclerostin domain-containing protein 1 OS=Mus musculus GN=Sostdc1 PE=1 SV=1             |
| 7. <a href="#">CTNB1_MOUSE</a>  | 86043  | 32    | Catenin beta-1 OS=Mus musculus GN=Ctnnb1 PE=1 SV=1                                      |
| 8. <a href="#">PTN11_MOUSE</a>  | 68988  | 31    | Tyrosine-protein phosphatase non-receptor type 11 OS=Mus musculus GN=Ptpn11 PE=1 SV=2   |
| 9. <a href="#">RS24_MOUSE</a>   | 15413  | 30    | 40S ribosomal protein S24 OS=Mus musculus GN=Rps24 PE=1 SV=1                            |
| 10. <a href="#">DOC2A_MOUSE</a> | 45208  | 29    | Double C2-like domain-containing protein alpha OS=Mus musculus GN=Doc2a PE=2 SV=1       |

## Results List

1. [MYL6\\_MOUSE](#) Mass: 17090 Score: 170 Expect: 1.6e-013 Matches: 7

Myosin light polypeptide 6 OS=Mus musculus GN=Myl6 PE=1 SV=3

**Observed Mr(expt) Mr(calc) ppm Start End Miss Ions Peptide**

995.6080 994.6007 994.5811 19.7 111 - 119 0 --- R.HVLVTLGEK.M  
1025.4902 1024.4829 1024.4978 -14.52 14 - 21 0 22 K.EAFQLFDR.T  
1341.6168 1340.6096 1340.6217 -9.05 27 - 37 0 22 K.ILYSQCGDVMR.A  
1357.6120 1356.6047 1356.6166 -8.77 27 - 37 0 --- K.ILYSQCGDVMR.A + Oxidation (M)  
1446.7364 1445.7291 1445.7184 7.42 51 - 63 1 --- K.VLGNPKSDEMNVK.V + Oxidation (M)  
1544.6801 1543.6729 1543.6791 -4.01 82 - 94 0 --- K.DQGT YEDYVEGLR.V  
1786.8185 1785.8112 1785.8169 -3.19 80 - 94 1 66 K.NKDQGT YEDYVEGLR.V

**No match to:** 1007.4783, 1011.6284, 1075.5128, 1137.5381, 1160.5709, 1178.6055, 1206.6118, 1216.5676, 1234.6356, 1253.6032, 1293.6295, 1302.7943, 1338.7690, 1376.7063, 1387.6855, 1403.6965, 1455.8826, 1494.7340, 1510.7327, 1529.8186, 1532.6220, 1554.6007, 1697.7895, 1721.8494, 1723.8296, 1798.8191, 1836.8735, 1870.9058, 1876.9320, 1898.8765, 1926.9065, 1939.9283, 2539.0777, 3106.3151, 3154.3115

**2. CBLB\_MOUSE Mass: 110535 Score: 36 Expect: 3.9 Matches: 8**

E3 ubiquitin-protein ligase CBL-B OS=Mus musculus GN=Cblb PE=1 SV=2

**Observed Mr(expt) Mr(calc) ppm Start End Miss Ions Peptide**

1025.4902 1024.4829 1024.4317 50.0 456 - 463 0 2 R.EESLMMNR.L + Oxidation (M)  
1178.6055 1177.5982 1177.5947 2.96 631 - 640 1 --- R.MGSEQVLMRK.H  
1216.5676 1215.5603 1215.5560 3.54 326 - 335 0 --- R.EGFYLYPDGR.S  
1341.6168 1340.6096 1340.6612 -38.51 98 - 108 0 --- K.LAQLSENEYFK.I  
1357.6120 1356.6047 1356.5728 23.5 132 - 141 1 --- R.MYEEQSQDRR.N + Oxidation (M)  
1446.7364 1445.7291 1445.6867 29.3 628 - 639 1 --- R.HSRMGSEQVLMR.K + Oxidation (M)  
1544.6801 1543.6729 1543.7341 -39.63 939 - 951 1 --- K.LMGEGYAFEEVKR.A + Oxidation (M)  
1939.9283 1938.9210 1939.0123 -47.09 608 - 627 0 --- R.ILGDGSPKPGVTANSSLNGR.H

**No match to:** 995.6080, 1007.4783, 1011.6284, 1075.5128, 1137.5381, 1160.5709, 1206.6118, 1234.6356, 1253.6032, 1293.6295, 1302.7943, 1338.7690, 1376.7063, 1387.6855, 1403.6965, 1455.8826, 1494.7340, 1510.7327, 1529.8186, 1532.6220, 1554.6007, 1697.7895, 1721.8494, 1723.8296, 1786.8185, 1798.8191, 1836.8735, 1870.9058, 1876.9320, 1898.8765, 1926.9065, 2539.0777, 3106.3151, 3154.3115

**3. DNS2B\_MOUSE Mass: 41281 Score: 34 Expect: 6.3 Matches: 5**

Deoxyribonuclease-2-beta OS=Mus musculus GN=Dnase2b PE=2 SV=1

**Observed Mr(expt) Mr(calc) ppm Start End Miss Ions Peptide**

1341.6168 1340.6096 1340.6109 -1.01 290 - 300 1 --- K.SYFSSRQDHSK.W  
1387.6855 1386.6782 1386.6714 4.91 296 - 306 1 --- R.QDHSKWCVSIK.G  
1723.8296 1722.8223 1722.9053 -48.18 67 - 80 1 --- R.QTWNKSLYLINSTR.S  
1786.8185 1785.8112 1785.8575 -25.93 199 - 213 1 --- K.LIYMPRMCANSSSLK.I + Oxidation (M)  
1939.9283 1938.9210 1938.9846 -32.82 312 - 327 1 --- R.WTCIGDLNRSLSLHQLR.G

**No match to:** 995.6080, 1007.4783, 1011.6284, 1025.4902, 1075.5128, 1137.5381, 1160.5709, 1178.6055, 1206.6118, 1216.5676, 1234.6356, 1253.6032, 1293.6295, 1302.7943, 1338.7690, 1357.6120, 1376.7063, 1403.6965, 1446.7364, 1455.8826, 1494.7340, 1510.7327, 1529.8186, 1532.6220, 1544.6801, 1554.6007, 1697.7895, 1721.8494, 1798.8191, 1836.8735, 1870.9058, 1876.9320, 1898.8765, 1926.9065, 2539.0777, 3106.3151, 3154.3115

**4. SETX\_MOUSE Mass: 301621 Score: 33 Expect: 8.1 Matches: 13**

Probable helicase senataxin OS=Mus musculus GN=Setx PE=2 SV=1

| Observed  | Mr(expt)  | Mr(calc)  | ppm    | Start | End   | Miss | Ions | Peptide                                        |
|-----------|-----------|-----------|--------|-------|-------|------|------|------------------------------------------------|
| 1338.7690 | 1337.7617 | 1337.7092 | 39.3   | 1751  | -1760 | 1    | --   | K.ENFYQLQLRK.F                                 |
| 1376.7063 | 1375.6990 | 1375.7493 | -36.56 | 1853  | -1864 | 0    | --   | R.CIVISLVTQR.K                                 |
| 1446.7364 | 1445.7291 | 1445.7772 | -33.27 | 1868  | -1880 | 1    | --   | K.AMSLLSSRNQLAR.A                              |
| 1455.8826 | 1454.8753 | 1454.8456 | 20.4   | 1316  | -1328 | 1    | --   | K.LISPQTLSIKNNK.K                              |
| 1494.7340 | 1493.7267 | 1493.7773 | -33.83 | 2048  | -2059 | 1    | --   | K.DLPSHIQEMLRR.K                               |
| 1510.7327 | 1509.7254 | 1509.7722 | -30.96 | 2048  | -2059 | 1    | --   | K.DLPSHIQEMLRR.K + Oxidation (M)               |
| 1529.8186 | 1528.8113 | 1528.8096 | 1.08   | 2060  | -2072 | 1    | --   | R.KEILDAQLDELSR.Q                              |
| 1697.7895 | 1696.7822 | 1696.8342 | -30.61 | 655   | -668  | 1    | --   | R.VLMKVNTTEENFK.Q + Oxidation (M)              |
| 1721.8494 | 1720.8421 | 1720.7913 | 29.5   | 263   | -276  | 0    | --   | K.QNDFMQSILHTEK.Q                              |
| 1798.8191 | 1797.8118 | 1797.8389 | -15.08 | 631   | -645  | 1    | --   | K.KNIYCLENCSPVSSKE                             |
| 1836.8735 | 1835.8662 | 1835.8537 | 6.78   | 830   | -846  | 0    | --   | K.EDSIGNVPSDPVLDDK.H                           |
| 1926.9065 | 1925.8992 | 1925.9193 | -10.42 | 1788  | -1803 | 1    | --   | K.ENDLVFLAPEKSYMADR.H                          |
| 3154.3115 | 3153.3042 | 3153.4423 | -43.80 | 340   | -365  | 1    | --   | K.LEPEPHFDDMVTCSQIVYNFNPEKTK.K + Oxidation (M) |

**No match to:** 995.6080, 1007.4783, 1011.6284, 1025.4902, 1075.5128, 1137.5381, 1160.5709, 1178.6055, 1206.6118, 1216.5676, 1234.6356, 1253.6032, 1293.6295, 1302.7943, 1341.6168, 1357.6120, 1387.6855, 1403.6965, 1532.6220, 1544.6801, 1554.6007, 1723.8296, 1786.8185, 1870.9058, 1876.9320, 1898.8765, 1939.9283, 2539.0777, 3106.3151

5. KCNB1\_MOUSE Mass: 96487 Score: 32 Expect: 10 Matches: 7

Potassium voltage-gated channel subfamily B member 1 OS=Mus musculus GN=Kcnb1 PE=1 SV=1

| Observed  | Mr(expt)  | Mr(calc)  | ppm    | Start | End  | Miss | Ions | Peptide                                     |
|-----------|-----------|-----------|--------|-------|------|------|------|---------------------------------------------|
| 1025.4902 | 1024.4829 | 1024.4978 | -14.54 | 649   | -657 | 0    | --   | R.SGFFVESPR.S                               |
| 1160.5709 | 1159.5636 | 1159.5478 | 13.7   | 658   | -667 | 1    | --   | R.SSMKTHNPMK.L                              |
| 1293.6295 | 1292.6222 | 1292.6356 | -10.32 | 457   | -467 | 0    | --   | R.SIEMMDIVVEK.N                             |
| 1357.6120 | 1356.6047 | 1356.6707 | -48.65 | 637   | -648 | 0    | --   | R.LMETNPIPEASR.S                            |
| 1798.8191 | 1797.8118 | 1797.8897 | -43.32 | 791   | -806 | 1    | --   | R.TEKNHFESSPLTSPK.F                         |
| 1836.8735 | 1835.8662 | 1835.9431 | -41.89 | 88    | -103 | 1    | --   | R.HPGAFTSILNFYRTGR.L                        |
| 2539.0777 | 2538.0704 | 2538.1842 | -44.85 | 517   | -538 | 1    | --   | R.SSSSPQHLNVQLQDMYSKMAK.T + 2 Oxidation (M) |

**No match to:** 995.6080, 1007.4783, 1011.6284, 1075.5128, 1137.5381, 1178.6055, 1206.6118, 1216.5676, 1234.6356, 1253.6032, 1302.7943, 1338.7690, 1341.6168, 1376.7063, 1387.6855, 1403.6965, 1446.7364, 1455.8826, 1494.7340, 1510.7327, 1529.8186, 1532.6220, 1544.6801, 1554.6007, 1697.7895, 1721.8494, 1723.8296, 1786.8185, 1870.9058, 1876.9320, 1898.8765, 1926.9065, 1939.9283, 3106.3151, 3154.3115

6. SOSD1\_MOUSE Mass: 23730 Score: 32 Expect: 10 Matches: 4

Sclerostin domain-containing protein 1 OS=Mus musculus GN=Sostdc1 PE=1 SV=1

| Observed  | Mr(expt)  | Mr(calc)  | ppm    | Start | End  | Miss | Ions | Peptide            |
|-----------|-----------|-----------|--------|-------|------|------|------|--------------------|
| 1075.5128 | 1074.5055 | 1074.5353 | -27.67 | 68    | -76  | 1    | --   | R.NSRVQVGCR.E      |
| 1376.7063 | 1375.6990 | 1375.6593 | 28.9   | 59    | -70  | 1    | --   | R.HFSSTGLDRNSR.V   |
| 1403.6965 | 1402.6892 | 1402.6702 | 13.5   | 55    | -67  | 1    | --   | R.NGGRHFSSTGLDR.N  |
| 1697.7895 | 1696.7822 | 1696.8203 | -22.41 | 143   | -156 | 1    | --   | R.IQLQCQDGSTRFYK.I |

**No match to:** 995.6080, 1007.4783, 1011.6284, 1025.4902, 1137.5381, 1160.5709, 1178.6055, 1206.6118, 1216.5676, 1234.6356, 1253.6032, 1293.6295, 1302.7943, 1338.7690, 1341.6168, 1357.6120, 1387.6855, 1446.7364, 1455.8826, 1494.7340, 1510.7327, 1529.8186, 1532.6220, 1544.6801, 1554.6007, 1721.8494, 1723.8296, 1786.8185, 1798.8191, 1836.8735, 1870.9058, 1876.9320, 1898.8765, 1926.9065, 1939.9283, 2539.0777, 3106.3151, 3154.3115

7. CTNB1\_MOUSE Mass: 86043 Score: 32 Expect: 11 Matches: 6

Catenin beta-1 OS=Mus musculus GN=Ctnnb1 PE=1 SV=1

**Observed Mr(expt) Mr(calc) ppm Start End Miss Ions Peptide**

1387.6855 1386.6782 1386.6813 -2.21 458 - 469 0 --- R.EDITEPAICALR.H  
1446.7364 1445.7291 1445.7561 -18.66 516 - 528 0 --- R.NLALCPANHAPLR.E  
1455.8826 1454.8753 1454.8643 7.58 275 - 288 1 --- R.LAGGLQKMVALLNK.T  
1786.8185 1785.8112 1785.8679 -31.74 454 - 469 1 3 R.AGDREDITEPAICALR.H  
1836.8735 1835.8662 1835.9056 -21.46 434 - 449 1 --- K.NKMMVCQVGGIEALVR.T + 2 Oxidation (M)  
1898.8765 1897.8692 1897.9390 -36.74 566 - 582 0 --- R.MEEIVEGCTGALHILAR.D

**No match to:** 995.6080, 1007.4783, 1011.6284, 1025.4902, 1075.5128, 1137.5381, 1160.5709, 1178.6055, 1206.6118, 1216.5676, 1234.6356, 1253.6032, 1293.6295, 1302.7943, 1338.7690, 1341.6168, 1357.6120, 1376.7063, 1403.6965, 1494.7340, 1510.7327, 1529.8186, 1532.6220, 1544.6801, 1554.6007, 1697.7895, 1721.8494, 1723.8296, 1798.8191, 1870.9058, 1876.9320, 1926.9065, 1939.9283, 2539.0777, 3106.3151, 3154.3115

8. PTN1\_MOUSE Mass: 68988 Score: 31 Expect: 13 Matches: 7

Tyrosine-protein phosphatase non-receptor type 11 OS=Mus musculus GN=Ptpn11 PE=1 SV=2

**Observed Mr(expt) Mr(calc) ppm Start End Miss Ions Peptide**

995.6080 994.6007 994.5672 33.7 47 - 55 1 --- R.RNGAVTHIK.I  
1025.4902 1024.4829 1024.5124 -28.78 379 - 386 1 --- K.EYGVMRVR.N + Oxidation (M)  
1234.6356 1233.6283 1233.6452 -13.73 232 - 242 1 --- R.ELSKLAETTDK.V  
1403.6965 1402.6892 1402.7357 -33.18 279 - 289 1 --- R.YKNILPFDHTR.V  
1510.7327 1509.7254 1509.6882 24.7 174 - 186 1 --- R.CQELKYDVGGER.F  
1529.8186 1528.8113 1528.7854 16.9 167 - 178 1 --- K.VTHVMIRCQELK.Y + Oxidation (M)  
1870.9058 1869.8985 1869.9156 -9.10 583 - 597 1 --- R.VYENVGLMQQRSFR.- + Oxidation (M)

**No match to:** 1007.4783, 1011.6284, 1075.5128, 1137.5381, 1160.5709, 1178.6055, 1206.6118, 1216.5676, 1253.6032, 1293.6295, 1302.7943, 1338.7690, 1341.6168, 1357.6120, 1376.7063, 1387.6855, 1446.7364, 1455.8826, 1494.7340, 1532.6220, 1544.6801, 1554.6007, 1697.7895, 1721.8494, 1723.8296, 1786.8185, 1798.8191, 1836.8735, 1876.9320, 1898.8765, 1926.9065, 1939.9283, 2539.0777, 3106.3151, 3154.3115

9. RS24\_MOUSE Mass: 15413 Score: 30 Expect: 15 Matches: 4

40S ribosomal protein S24 OS=Mus musculus GN=Rps24 PE=1 SV=1

**Observed Mr(expt) Mr(calc) ppm Start End Miss Ions Peptide**

1178.6055 1177.5982 1177.6390 -34.61 12 - 20 1 --- K.FMTNRLLR.K  
1206.6118 1205.6045 1205.6187 -11.74 1 - 10 1 --- -.MNDTVTIRTR.K  
1697.7895 1696.7822 1696.7654 9.90 69 - 83 0 --- K.TTGFGMIYDSLIDYAK.K + Oxidation (M)  
1836.8735 1835.8662 1835.9281 -33.69 47 - 61 1 --- K.MYKTPDVIFVFGFR.T + Oxidation (M)

**No match to:** 995.6080, 1007.4783, 1011.6284, 1025.4902, 1075.5128, 1137.5381, 1160.5709, 1216.5676, 1234.6356, 1253.6032, 1293.6295, 1302.7943, 1338.7690, 1341.6168, 1357.6120, 1376.7063, 1387.6855, 1403.6965, 1446.7364, 1455.8826, 1494.7340, 1510.7327, 1529.8186, 1532.6220, 1544.6801, 1554.6007, 1721.8494, 1723.8296, 1786.8185, 1798.8191, 1870.9058, 1876.9320, 1898.8765, 1926.9065, 1939.9283, 2539.0777, 3106.3151, 3154.3115

10. DOC2A\_MOUSE Mass: 45208 Score: 29 Expect: 20 Matches: 5

Double C2-like domain-containing protein alpha OS=Mus musculus GN=Doc2a PE=2 SV=1

**Observed Mr(expt) Mr(calc) ppm Start End Miss Ions Peptide**



1025.4902 1024.4829 1024.4978 -14.52 31 - 38 0 --- R.QISDYFPR.R  
1216.5676 1215.5603 1215.6182 -47.64 212 - 220 1 --- K.KHFNICLER.Q  
1234.6356 1233.6283 1233.6717 -35.21 298 - 307 1 --- K.TYLRPDVKK.S  
1446.7364 1445.7291 1445.7263 1.96 353 - 367 0 --- K.SNDFIGGVSLGPGAR.G  
1697.7895 1696.7822 1696.8268 -26.24 243 - 257 0 --- K.ELEQAEQGPGLLEER.G

**No match to:** 995.6080, 1007.4783, 1011.6284, 1075.5128, 1137.5381, 1160.5709, 1178.6055, 1206.6118, 1253.6032, 1293.6295, 1302.7943, 1338.7690, 1341.6168, 1357.6120, 1376.7063, 1387.6855, 1403.6965, 1455.8826, 1494.7340, 1510.7327, 1529.8186, 1532.6220, 1544.6801, 1554.6007, 1721.8494, 1723.8296, 1786.8185, 1798.8191, 1836.8735, 1870.9058, 1876.9320, 1898.8765, 1926.9065, 1939.9283, 2539.0777, 3106.3151, 3154.3115

#### Search Parameters

Type of search : MS/MS Ion Search  
Enzyme : Trypsin  
Fixed modifications : Carbamidomethyl (C)  
Variable modifications : Oxidation (M)  
Mass values : Monoisotopic  
Protein Mass : Unrestricted  
Peptide Mass Tolerance :  $\pm 50$  ppm  
Fragment Mass Tolerance:  $\pm 0.6$  Da  
Max Missed Cleavages : 1  
Instrument type : MALDI-TOF-TOF  
Query1 (995.6080,1+) : <no title>  
Query2 (1007.4783,1+) : <no title>  
Query3 (1011.6284,1+) : <no title>  
Query4 (1025.4902,1+) : <no title>  
Query5 (1075.5128,1+) : <no title>  
Query6 (1137.5381,1+) : <no title>  
Query7 (1160.5709,1+) : <no title>  
Query8 (1178.6055,1+) : <no title>  
Query9 (1206.6118,1+) : <no title>  
Query10 (1216.5676,1+) : <no title>  
Query11 (1234.6356,1+) : <no title>  
Query12 (1253.6032,1+) : <no title>  
Query13 (1293.6295,1+) : <no title>  
Query14 (1302.7943,1+) : <no title>  
Query15 (1338.7690,1+) : <no title>  
Query16 (1341.6168,1+) : <no title>  
Query17 (1357.6120,1+) : <no title>  
Query18 (1376.7063,1+) : <no title>  
Query19 (1387.6855,1+) : <no title>  
Query20 (1403.6965,1+) : <no title>  
Query21 (1446.7364,1+) : <no title>  
Query22 (1455.8826,1+) : <no title>  
Query23 (1494.7340,1+) : <no title>

Query24 (1510.7327,1+) : <no title>  
Query25 (1529.8186,1+) : <no title>  
Query26 (1532.6220,1+) : <no title>  
Query27 (1544.6801,1+) : <no title>  
Query28 (1554.6007,1+) : <no title>  
Query29 (1697.7895,1+) : <no title>  
Query30 (1721.8494,1+) : <no title>  
Query31 (1723.8296,1+) : <no title>  
Query32 (1786.8185,1+) : <no title>  
Query33 (1798.8191,1+) : <no title>  
Query34 (1836.8735,1+) : <no title>  
Query35 (1870.9058,1+) : <no title>  
Query36 (1876.9320,1+) : <no title>  
Query37 (1898.8765,1+) : <no title>  
Query38 (1926.9065,1+) : <no title>  
Query39 (1939.9283,1+) : <no title>  
Query40 (2539.0777,1+) : <no title>  
Query41 (3106.3151,1+) : <no title>  
Query42 (3154.3115,1+) : <no title>

**Mascot:** <http://www.matrixscience.com/>

***MATRIX***  
***SCIENCE*** Mascot Search Results

User :  
Email :  
Search title : Auto submitted by BioTools  
Database : SwissProt 57.15 (515203 sequences; 181334896 residues)  
Taxonomy : Mus. (16281 sequences)  
Timestamp : 20 May 2013 at 01:31:13 GMT  
Warning : A Peptide summary report will usually give a much clearer picture of MS/MS search results.  
Top Score : 116 for TAGL\_MOUSE, Transgelin OS=Mus musculus GN=Tagln PE=1 SV=3

**Mascot Score Histogram**

Protein score is  $-10 \cdot \log(P)$ , where P is the probability that the observed match is a random event.

Protein scores greater than 55 are significant ( $p < 0.05$ ).

Protein scores are derived from ions scores as a non-probabilistic basis for ranking protein hits.

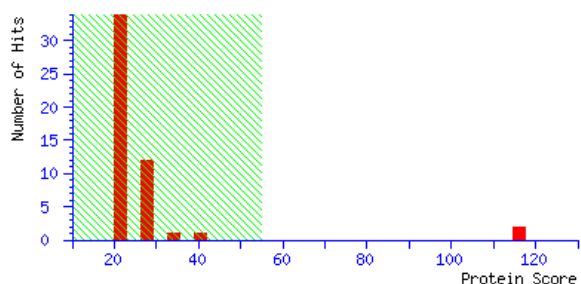

## Protein Summary Report

### Index

| Accession              | Mass   | Score | Description                                                                                           |
|------------------------|--------|-------|-------------------------------------------------------------------------------------------------------|
| <u>1. TAGL_MOUSE</u>   | 22618  | 116   | Transgelin OS=Mus musculus GN=Tagln PE=1 SV=3                                                         |
| <u>2. TAGL2_MOUSE</u>  | 22552  | 115   | Transgelin-2 OS=Mus musculus GN=Tagln2 PE=1 SV=4                                                      |
| <u>3. PPDF_MOUSE</u>   | 12309  | 38    | Pancreatic progenitor cell differentiation and proliferation factor OS=Mus musculus GN=Ppdf PE=2 SV=1 |
| <u>4. PSF2_MOUSE</u>   | 21280  | 35    | DNA replication complex GINS protein PSF2 OS=Mus musculus GN=Gins2 PE=1 SV=1                          |
| <u>5. TRFL_MOUSE</u>   | 79698  | 29    | Lactotransferrin OS=Mus musculus GN=Ltf PE=2 SV=3                                                     |
| <u>6. YPEL5_MOUSE</u>  | 14061  | 28    | Protein yippee-like 5 OS=Mus musculus GN=Ypel5 PE=2 SV=1                                              |
| <u>7. EXOSX_MOUSE</u>  | 101593 | 28    | Exosome component 10 OS=Mus musculus GN=Exosc10 PE=1 SV=1                                             |
| <u>8. KATL2_MOUSE</u>  | 61514  | 27    | Katanin p60 ATPase-containing subunit A-like 2 OS=Mus musculus GN=Katnal2 PE=2 SV=2                   |
| <u>9. UD1_MOUSE</u>    | 60825  | 27    | UDP-glucuronosyltransferase 1-1 OS=Mus musculus GN=Ugt1a1 PE=2 SV=1                                   |
| <u>10. CIP2A_MOUSE</u> | 103245 | 27    | Protein CIP2A OS=Mus musculus GN=Kiaa1524 PE=2 SV=2                                                   |

### Results List

#### 1. TAGL\_MOUSE Mass: 22618 Score: 116 Expect: 4.1e-008 Matches: 8

Transgelin OS=Mus musculus GN=Tagln PE=1 SV=3

**Observed Mr(expt) Mr(calc) ppm Start End Miss Ions Peptide**

|           |           |           |        |           |   |     |                           |
|-----------|-----------|-----------|--------|-----------|---|-----|---------------------------|
| 990.5854  | 989.5781  | 989.5698  | 8.35   | 50 - 57   | 0 | --- | R.LGFQVWLK.N              |
| 1210.5673 | 1209.5600 | 1209.5513 | 7.20   | 21 - 29   | 1 | 65  | K.KYDEELEER.L             |
| 1221.6338 | 1220.6265 | 1220.6223 | 3.42   | 90 - 99   | 0 | --- | K.QMEQVAQFLK.A            |
| 1244.6205 | 1243.6132 | 1243.6271 | -11.18 | 79 - 89   | 0 | --- | K.VPENPPSMVFK.Q           |
| 1530.8487 | 1529.8415 | 1529.8453 | -2.52  | 65 - 78   | 0 | --- | K.LVNSLYPEGSKPK.V         |
| 1546.7044 | 1545.6971 | 1545.7021 | -3.24  | 109 - 121 | 0 | --- | K.TDMFQTVLDLYEGK.D        |
| 2095.0772 | 2094.0699 | 2094.0681 | 0.89   | 30 - 47   | 0 | --- | R.LVEWIVVQCGPDVGRPDR.G    |
| 2318.0894 | 2317.0821 | 2317.0719 | 4.42   | 109 - 128 | 1 | --- | K.TDMFQTVLDLYEGKDMAAVQR.T |

**No match to:** 836.4357, 1012.5682, 1028.5487, 1082.5293, 1215.6903, 1224.5719, 1226.6422, 1243.6207, 1266.6168, 1374.7454, 1453.6821, 1552.8336, 1568.7343, 1594.7141, 1616.7077, 1661.7964, 1678.8320, 1694.8296, 1714.7321, 1724.5583, 1730.7547, 1908.9082, 1946.5789, 2058.8849, 2079.4661, 2081.3996, 2122.0422, 2377.1552, 2394.1848, 2459.1192, 2691.3030, 3337.7248

#### 2. TAGL2\_MOUSE Mass: 22552 Score: 115 Expect: 5.1e-008 Matches: 8

Transgelin-2 OS=Mus musculus GN=Tagln2 PE=1 SV=4

**Observed Mr(expt) Mr(calc) ppm Start End Miss Ions Peptide**

836.4357 835.4284 835.4188 11.5 5 - 12 0 -- R.GPSYGLSRE  
 1082.5293 1081.5220 1081.5152 6.24 40 - 49 0 -- R.EDVQQPQGRE  
 1215.6903 1214.6830 1214.6805 2.09 128 - 139 0 13 R.TLMNGLGLAVAR.D  
 1244.6205 1243.6132 1243.6343 -16.97 172 - 182 0 -- K<sub>2</sub>NVIGLQMG<sub>2</sub>TNR.G + Acetyl (N-term)  
 1594.7141 1593.7068 1593.7100 -2.01 140 - 153 0 -- R.DDGLFSGDPNWF<sub>2</sub>PK.K  
 1678.8320 1677.8247 1677.8144 6.12 89 - 102 0 56 K.QMEQISQFLQAAER.Y  
 1694.8296 1693.8223 1693.8093 7.66 89 - 102 0 -- K.QMEQISQFLQAAER.Y + Oxidation (M)  
 2394.1848 2393.1775 2393.1685 3.77 21 - 39 0 -- K.QYDADLEQILIQWIT<sub>2</sub>QCR.E

**No match to:** 990.5854, 1012.5682, 1028.5487, 1210.5673, 1221.6338, 1224.5719, 1226.6422, 1243.6207, 1266.6168, 1374.7454, 1453.6821, 1530.8487, 1546.7044, 1552.8336, 1568.7343, 1616.7077, 1661.7964, 1714.7321, 1724.5583, 1730.7547, 1908.9082, 1946.5789, 2058.8849, 2079.4661, 2081.3996, 2095.0772, 2122.0422, 2318.0894, 2377.1552, 2459.1192, 2691.3030, 3337.7248

**3. PPDF MOUSE Mass: 12309 Score: 38 Expect: 2.7 Matches: 4**

Pancreatic progenitor cell differentiation and proliferation factor OS=Mus musculus GN=Ppdf PE=2 SV=1

**Observed Mr(expt) Mr(calc) ppm Start End Miss Ions Peptide**

1694.8296 1693.8223 1693.7678 32.2 49 - 62 0 -- K<sub>2</sub>ADPGHWWASFFFGK.S + Acetyl (N-term)  
 2095.0772 2094.0699 2094.0316 18.3 1 - 19 1 -- -.MAAIPSSGSLVATHDYRR.R  
 2394.1848 2393.1775 2393.1025 31.4 78 - 99 1 -- R.SAESPQVSRSPMTCGLTPETMK.Q  
 2691.3030 2690.2957 2690.3221 -9.81 63 - 86 1 -- K<sub>2</sub>STLPMFTTVLESPERSAESPQVSR.S + Acetyl (N-term)

**No match to:** 836.4357, 990.5854, 1012.5682, 1028.5487, 1082.5293, 1210.5673, 1215.6903, 1221.6338, 1224.5719, 1226.6422, 1243.6207, 1244.6205, 1266.6168, 1374.7454, 1453.6821, 1530.8487, 1546.7044, 1552.8336, 1568.7343, 1594.7141, 1616.7077, 1661.7964, 1678.8320, 1714.7321, 1724.5583, 1730.7547, 1908.9082, 1946.5789, 2058.8849, 2079.4661, 2081.3996, 2122.0422, 2318.0894, 2377.1552, 2459.1192, 3337.7248

**4. PSF2 MOUSE Mass: 21280 Score: 35 Expect: 5.1 Matches: 5**

DNA replication complex GINS protein PSF2 OS=Mus musculus GN=Gins2 PE=1 SV=1

**Observed Mr(expt) Mr(calc) ppm Start End Miss Ions Peptide**

1221.6338 1220.6265 1220.5925 27.9 2 - 12 0 -- M.DAAEVEFLAEK.E  
 1530.8487 1529.8415 1529.8341 4.82 13 - 25 0 -- K<sub>2</sub>ELVTIIPNFS<sub>2</sub>LDK.I + Acetyl (N-term)  
 1730.7547 1729.7474 1729.8167 -40.08 58 - 70 1 -- K<sub>2</sub>CRLPPEWMDVEK.L + Acetyl (N-term); Oxidation (M)  
 2691.3030 2690.2957 2690.4054 -40.77 2 - 25 1 -- M.DAAEVEFLAEKELVTIIPNFS<sub>2</sub>LDK.I  
 3337.7248 3336.7176 3336.6700 14.3 81 - 109 1 -- K.EETFTVPSPHYMEITKLLLNHASDNIPK.A + Oxidation (M)

**No match to:** 836.4357, 990.5854, 1012.5682, 1028.5487, 1082.5293, 1210.5673, 1215.6903, 1224.5719, 1226.6422, 1243.6207, 1244.6205, 1266.6168, 1374.7454, 1453.6821, 1546.7044, 1552.8336, 1568.7343, 1594.7141, 1616.7077, 1661.7964, 1678.8320, 1694.8296, 1714.7321, 1724.5583, 1908.9082, 1946.5789, 2058.8849, 2079.4661, 2081.3996, 2095.0772, 2122.0422, 2318.0894, 2377.1552, 2394.1848, 2459.1192

**5. TRFL MOUSE Mass: 79698 Score: 29 Expect: 20 Matches: 9**

Lactotransferrin OS=Mus musculus GN=Ltf PE=2 SV=3

**Observed Mr(expt) Mr(calc) ppm Start End Miss Ions Peptide**

1028.5487 1027.5414 1027.5087 31.8 541 - 549 0 -- R.YQGYTGALR.C  
 1221.6338 1220.6265 1220.6765 -40.92 682 - 691 1 -- K.EYVIATERLK.Q  
 1244.6205 1243.6132 1243.6343 -16.97 62 - 71 0 -- R<sub>2</sub>QCIQAI<sub>2</sub>V<sub>2</sub>TNR.A + Acetyl (N-term)

1453.6821 1452.6749 1452.6997 -17.13 460 - 472 1 --- R.EDAGFTWSSLRGK.K  
1552.8336 1551.8263 1551.7682 37.5 300 - 314 0 --- K.QASGFQLFASPSGQK.D  
1594.7141 1593.7068 1593.7787 -45.13 300 - 314 0 --- K.QASGFQLFASPSGQK.D + Acetyl (N-term)  
1908.9082 1907.9009 1907.8683 17.1 21 - 36 1 --- K.ATTVRWCAVSNSEEEK.C + Acetyl (N-term)  
2095.0772 2094.0699 2094.0125 27.4 690 - 707 1 --- R.LKQCSSSPLEACAFITQ.- + Acetyl (N-term)  
2318.0894 2317.0821 2317.1842 -44.05 332 - 351 0 --- K.VDVGLYLTFSTYTSIQNLNK.K + Acetyl (N-term)  
**No match to:** 836.4357, 990.5854, 1012.5682, 1082.5293, 1210.5673, 1215.6903, 1224.5719, 1226.6422, 1243.6207, 1266.6168, 1374.7454, 1530.8487, 1546.7044, 1568.7343, 1616.7077, 1661.7964, 1678.8320, 1694.8296, 1714.7321, 1724.5583, 1730.7547, 1946.5789, 2058.8849, 2079.4661, 2081.3996, 2122.0422, 2377.1552, 2394.1848, 2459.1192, 2691.3030, 3337.7248

**6. YPEL5\_MOUSE Mass: 14061 Score: 28 Expect: 25 Matches: 4**

Protein yippee-like 5 OS=Mus musculus GN=Ypel5 PE=2 SV=1

**Observed Mr(expt) Mr(cal) ppm Start End Miss Ions Peptide**

1215.6903 1214.6830 1214.6376 37.4 60 - 69 1 --- R.VMLTGRHMVR.D+ Oxidation (M)  
1530.8487 1529.8415 1529.7773 42.0 1 - 13 1 --- \_MGRIFLDHIGGTR.L + Acetyl (N-term); Oxidation (M)  
1714.7321 1713.7248 1713.7998 -43.79 80 - 93 0 --- K.LGWYIEFATEDSQR.Y  
2318.0894 2317.0821 2317.0433 16.7 75 - 93 1 --- K.NCNSKLGWIYEFATEDSQR.Y

**No match to:** 836.4357, 990.5854, 1012.5682, 1028.5487, 1082.5293, 1210.5673, 1221.6338, 1224.5719, 1226.6422, 1243.6207, 1244.6205, 1266.6168, 1374.7454, 1453.6821, 1546.7044, 1552.8336, 1568.7343, 1594.7141, 1616.7077, 1661.7964, 1678.8320, 1694.8296, 1724.5583, 1730.7547, 1908.9082, 1946.5789, 2058.8849, 2079.4661, 2081.3996, 2095.0772, 2122.0422, 2377.1552, 2394.1848, 2459.1192, 2691.3030, 3337.7248

**7. EXOSX\_MOUSE Mass: 101593 Score: 28 Expect: 27 Matches: 9**

Exosome component 10 OS=Mus musculus GN=Exosc10 PE=1 SV=1

**Observed Mr(expt) Mr(cal) ppm Start End Miss Ions Peptide**

990.5854 989.5781 989.5406 37.8 401 - 408 0 --- R.HSLDHLLR.L  
1226.6422 1225.6349 1225.5761 48.0 868 - 878 1 --- K.SMSFAVGKSDR.G + Acetyl (N-term)  
1243.6207 1242.6134 1242.6568 -34.86 771 - 781 1 --- R.QQAALENATKK.R + Acetyl (N-term)  
1374.7454 1373.7381 1373.6861 37.9 124 - 136 0 --- R.VGMLLDEASGVNK.H + Acetyl (N-term)  
1530.8487 1529.8415 1529.7871 35.5 578 - 591 1 --- R.EMPLLKSENAAGVR.K + Oxidation (M)  
1552.8336 1551.8263 1551.8256 0.44 756 - 770 0 --- K.EEAAAGVLEQAIPVR.Q  
1661.7964 1660.7892 1660.8672 -46.99 110 - 123 0 --- K.FDLLVDTNDVILER.V  
1908.9082 1907.9009 1907.9550 -28.37 347 - 363 0 --- R.SDMYILNESLTPAIVK.V  
2691.3030 2690.2957 2690.2040 34.1 65 - 86 1 --- R.SFPAFAQFCETQGDRLLQCMSR.V + Acetyl (N-term)

**No match to:** 836.4357, 1012.5682, 1028.5487, 1082.5293, 1210.5673, 1215.6903, 1221.6338, 1224.5719, 1244.6205, 1266.6168, 1453.6821, 1546.7044, 1568.7343, 1594.7141, 1616.7077, 1678.8320, 1694.8296, 1714.7321, 1724.5583, 1730.7547, 1946.5789, 2058.8849, 2079.4661, 2081.3996, 2095.0772, 2122.0422, 2318.0894, 2377.1552, 2394.1848, 2459.1192, 3337.7248

**8. KATL2\_MOUSE Mass: 61514 Score: 27 Expect: 31 Matches: 7**

Katanin p60 ATPase-containing subunit A-like 2 OS=Mus musculus GN=Katnal2 PE=2 SV=2

**Observed Mr(expt) Mr(cal) ppm Start End Miss Ions Peptide**

1215.6903 1214.6830 1214.6295 44.1 254 - 264 0 --- K.WNDIIGLDAAK.Q  
1226.6422 1225.6349 1225.6455 -8.63 244 - 253 0 --- R.DIYLHNPNIK.W

1546.7044 1545.6971 1545.7358 -25.01 10 - 21 1 -- K\_LTHQAREAYEMR.T + Acetyl (N-term)  
 1616.7077 1615.7005 1615.7447 -27.36 364 - 378 1 -- R.GMVPGGEHEGSLRMK.T + 2 Oxidation (M)  
 1678.8320 1677.8247 1677.8430 -10.88 377 - 390 1 -- R\_MKTELLVQMDGLAR.S + Acetyl (N-term); 2 Oxidation (M)  
 2377.1552 2376.1479 2376.2399 -38.69 28 - 47 0 -- K\_NLLILILHYLTQEGYMDAAK.A + Acetyl (N-term); Oxidation (M)  
 2691.3030 2690.2957 2690.3084 -4.70 391 - 413 0 -- R\_SEDLVFVLAASNLPWELDCAMLR.R + Acetyl (N-term)

**No match to:** 836.4357, 990.5854, 1012.5682, 1028.5487, 1082.5293, 1210.5673, 1221.6338, 1224.5719, 1243.6207, 1244.6205, 1266.6168, 1374.7454, 1453.6821, 1530.8487, 1552.8336, 1568.7343, 1594.7141, 1661.7964, 1694.8296, 1714.7321, 1724.5583, 1730.7547, 1908.9082, 1946.5789, 2058.8849, 2079.4661, 2081.3996, 2095.0772, 2122.0422, 2318.0894, 2394.1848, 2459.1192, 3337.7248

**9. UD11\_MOUSE Mass: 60825 Score: 27 Expect: 31 Matches: 8**

UDP-glucuronosyltransferase 1-1 OS=Mus musculus GN=Ugt1a1 PE=2 SV=1

**Observed Mr(expt) Mr(calc) ppm Start End Miss Ions Peptide**

990.5854 989.5781 989.5698 8.35 80 - 87 1 -- R.KFPVPFQK.E  
 1012.5682 1011.5609 1011.5865 -25.35 331 - 338 0 5 R.IPQTVLWR.Y  
 1082.5293 1081.5220 1081.5226 -0.55 437 - 444 1 -- K\_SYKENIMR.L + Acetyl (N-term)  
 1552.8336 1551.8263 1551.7538 46.8 214 - 226 0 -- K.NVLLAVSENFMC.R.V  
 1568.7343 1567.7270 1567.7487 -13.84 214 - 226 0 -- K.NVLLAVSENFMC.R.V + Oxidation (M)  
 1594.7141 1593.7068 1593.7643 -36.09 214 - 226 0 -- K\_NVLLAVSENFMC.R.V + Acetyl (N-term)  
 1730.7547 1729.7474 1729.8206 -42.30 198 - 211 1 -- K.SLSFNSDRMNFLQR.V + Oxidation (M)  
 2691.3030 2690.2957 2690.3255 -11.06 406 - 430 1 -- R.METRAGAVTLNVLEMTADDLENALK.T

**No match to:** 836.4357, 1028.5487, 1210.5673, 1215.6903, 1221.6338, 1224.5719, 1226.6422, 1243.6207, 1244.6205, 1266.6168, 1374.7454, 1453.6821, 1530.8487, 1546.7044, 1616.7077, 1661.7964, 1678.8320, 1694.8296, 1714.7321, 1724.5583, 1908.9082, 1946.5789, 2058.8849, 2079.4661, 2081.3996, 2095.0772, 2122.0422, 2318.0894, 2377.1552, 2394.1848, 2459.1192, 3337.7248

**10. CIP2A\_MOUSE Mass: 103245 Score: 27 Expect: 36 Matches: 8**

Protein CIP2A OS=Mus musculus GN=Kiaal524 PE=2 SV=2

**Observed Mr(expt) Mr(calc) ppm Start End Miss Ions Peptide**

836.4357 835.4284 835.4473 -22.66 483 - 489 0 -- K.TLTLMNK.L + Oxidation (M)  
 1215.6903 1214.6830 1214.6255 47.4 790 - 799 1 -- R\_KEVQSQLADR.E + Acetyl (N-term)  
 1530.8487 1529.8415 1529.7759 42.9 847 - 859 1 -- K\_ELSIKASSEM.HK.A + Acetyl (N-term); Oxidation (M)  
 1694.8296 1693.8223 1693.8536 -18.47 705 - 718 1 -- R.AQN<sup>D</sup>IEHLFQHSKK.L  
 2122.0422 2121.0350 2121.1178 -39.05 22 - 40 1 -- K\_SEANATQLLRHLEVVS<sup>G</sup>QK.L + Acetyl (N-term)  
 2318.0894 2317.0821 2317.0943 -5.28 110 - 128 0 -- R\_SSACHNDSVFLQCIQLLQR.L + Acetyl (N-term)  
 2459.1192 2458.1119 2458.2097 -39.76 316 - 337 0 -- R.HVLSQMMFEQSPSGNILGSRPK.S + Oxidation (M)  
 2691.3030 2690.2957 2690.3520 -20.91 883 - 907 1 -- K.HSHMIAMIHSLSGGKISPETVNLSI.- + 2 Oxidation (M)

**No match to:** 990.5854, 1012.5682, 1028.5487, 1082.5293, 1210.5673, 1221.6338, 1224.5719, 1226.6422, 1243.6207, 1244.6205, 1266.6168, 1374.7454, 1453.6821, 1546.7044, 1552.8336, 1568.7343, 1594.7141, 1616.7077, 1661.7964, 1678.8320, 1714.7321, 1724.5583, 1730.7547, 1908.9082, 1946.5789, 2058.8849, 2079.4661, 2081.3996, 2095.0772, 2377.1552, 2394.1848, 3337.7248

**Search Parameters**

**Type of search** : MS/MS Ion Search  
**Enzyme** : Trypsin  
**Fixed modifications** : Carbamidomethyl (C)

Variable modifications : Acetyl (N-term),Oxidation (M)

Mass values : Monoisotopic

Protein Mass : Unrestricted

Peptide Mass Tolerance :  $\pm 50$  ppm

Fragment Mass Tolerance:  $\pm 0.5$  Da

Max Missed Cleavages : 1

Instrument type : MALDI-TOF-TOF

Query1 (836.4357,1+) : <no title>

Query2 (990.5854,1+) : <no title>

Query3 (1012.5682,1+) : <no title>

Query4 (1028.5487,1+) : <no title>

Query5 (1082.5293,1+) : <no title>

Query6 (1210.5673,1+) : <no title>

Query7 (1215.6903,1+) : <no title>

Query8 (1221.6338,1+) : <no title>

Query9 (1224.5719,1+) : <no title>

Query10 (1226.6422,1+) : <no title>

Query11 (1243.6207,1+) : <no title>

Query12 (1244.6205,1+) : <no title>

Query13 (1266.6168,1+) : <no title>

Query14 (1374.7454,1+) : <no title>

Query15 (1453.6821,1+) : <no title>

Query16 (1530.8487,1+) : <no title>

Query17 (1546.7044,1+) : <no title>

Query18 (1552.8336,1+) : <no title>

Query19 (1568.7343,1+) : <no title>

Query20 (1594.7141,1+) : <no title>

Query21 (1616.7077,1+) : <no title>

Query22 (1661.7964,1+) : <no title>

Query23 (1678.8320,1+) : <no title>

Query24 (1694.8296,1+) : <no title>

Query25 (1714.7321,1+) : <no title>

Query26 (1724.5583,1+) : <no title>

Query27 (1730.7547,1+) : <no title>

Query28 (1908.9082,1+) : <no title>

Query29 (1946.5789,1+) : <no title>

Query30 (2058.8849,1+) : <no title>

Query31 (2079.4661,1+) : <no title>

Query32 (2081.3996,1+) : <no title>

Query33 (2095.0772,1+) : <no title>

Query34 (2122.0422,1+) : <no title>

Query35 (2318.0894,1+) : <no title>

Query36 (2377.1552,1+) : <no title>

Query37 (2394.1848,1+) : <no title>

Query38 (2459.1192,1+) : <no title>

Query39 (2691.3030,1+) : <no title>

Query40 (3337.7248,1+) : <no title>

Mascot: <http://www.matrixscience.com/>

## Mascot Search Results

User :  
Email :  
Search title : Auto submitted by BioTools  
Database : SwissProt 57.15 (515203 sequences; 181334896 residues)  
Taxonomy : Mus. (16281 sequences)  
Timestamp : 20 May 2013 at 01:31:22 GMT  
Warning : A Peptide summary report will usually give a much clearer picture of MS/MS search results.  
Top Score : 186 for TAGL\_MOUSE, Transgelin OS=Mus musculus GN=Tagln PE=1 SV=3

### Mascot Score Histogram

Protein score is  $-10 \cdot \log(P)$ , where P is the probability that the observed match is a random event.

Protein scores greater than 55 are significant ( $p < 0.05$ ).

Protein scores are derived from ions scores as a non-probabilistic basis for ranking protein hits.

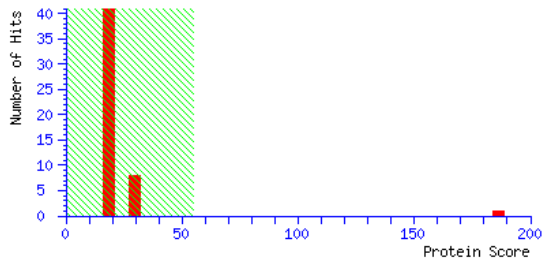

### Protein Summary Report

#### Index

| Accession                      | Mass   | Score | Description                                                           |
|--------------------------------|--------|-------|-----------------------------------------------------------------------|
| 1. <a href="#">TAGL_MOUSE</a>  | 22618  | 186   | Transgelin OS=Mus musculus GN=Tagln PE=1 SV=3                         |
| 2. <a href="#">SORCN_MOUSE</a> | 21898  | 33    | Sorcina OS=Mus musculus GN=Sri PE=1 SV=1                              |
| 3. <a href="#">KLRA1_MOUSE</a> | 31276  | 32    | T-cell surface glycoprotein YE1/48 OS=Mus musculus GN=Klra1 PE=1 SV=1 |
| 4. <a href="#">CO6A1_MOUSE</a> | 109562 | 32    | Collagen alpha-1(VI) chain OS=Mus musculus GN=Col6a1 PE=2 SV=1        |
| 5. <a href="#">NOP16_MOUSE</a> | 21183  | 32    | Nucleolar protein 16 OS=Mus musculus GN=Nop16 PE=2 SV=1               |
| 6. <a href="#">PCNT_MOUSE</a>  | 220085 | 29    | Pericentrin OS=Mus musculus GN=Pcnt PE=1 SV=1                         |



|                              |       |    |                                                                              |
|------------------------------|-------|----|------------------------------------------------------------------------------|
| <b>7. <u>RM38 MOUSE</u></b>  | 45287 | 27 | 39S ribosomal protein L38, mitochondrial OS=Mus musculus GN=Mrpl38 PE=2 SV=2 |
| <b>8. <u>RT24 MOUSE</u></b>  | 19174 | 26 | 28S ribosomal protein S24, mitochondrial OS=Mus musculus GN=Mrps24 PE=2 SV=1 |
| <b>9. <u>MBRL MOUSE</u></b>  | 63805 | 24 | Membralin OS=Mus musculus GN=ORF61 PE=1 SV=2                                 |
| <b>10. <u>KLC4 MOUSE</u></b> | 69084 | 24 | Kinesin light chain 4 OS=Mus musculus GN=Klc4 PE=1 SV=1                      |

## Results List

### 1. TAGL MOUSE Mass: 22618 Score: 186 Expect: 4.1e-015 Matches: 19

Transgelin OS=Mus musculus GN=Tagln PE=1 SV=3

| Observed                                                                                                                                                                                                                                                                                                                                                                                                                                                                 | Mr(expt)  | Mr(calc)  | ppm    | Start | End | Miss | Ions | Peptide                                      |
|--------------------------------------------------------------------------------------------------------------------------------------------------------------------------------------------------------------------------------------------------------------------------------------------------------------------------------------------------------------------------------------------------------------------------------------------------------------------------|-----------|-----------|--------|-------|-----|------|------|----------------------------------------------|
| 806.3542                                                                                                                                                                                                                                                                                                                                                                                                                                                                 | 805.3470  | 805.3752  | -35.09 | 122   | -   | 128  | 0    | --- K.DMAAVQR.T + Oxidation (M)              |
| 965.4665                                                                                                                                                                                                                                                                                                                                                                                                                                                                 | 964.4592  | 964.4865  | -28.36 | 100   | -   | 108  | 0    | --- K.AAEDYGVIK.T                            |
| 990.5630                                                                                                                                                                                                                                                                                                                                                                                                                                                                 | 989.5557  | 989.5698  | -14.29 | 50    | -   | 57   | 0    | --- R.LGFQVWLK.N                             |
| 994.4527                                                                                                                                                                                                                                                                                                                                                                                                                                                                 | 993.4454  | 993.4378  | 7.63   | 147   | -   | 154  | 0    | --- R.GDPNWFMK.K                             |
| 1082.4225                                                                                                                                                                                                                                                                                                                                                                                                                                                                | 1081.4153 | 1081.4563 | -38.00 | 22    | -   | 29   | 0    | --- K.YDEELEER.L                             |
| 1203.6778                                                                                                                                                                                                                                                                                                                                                                                                                                                                | 1202.6705 | 1202.6924 | -18.24 | 48    | -   | 57   | 1    | --- R.GRLGFQVWLK.N                           |
| 1204.6653                                                                                                                                                                                                                                                                                                                                                                                                                                                                | 1203.6580 | 1203.6897 | -26.33 | 129   | -   | 140  | 0    | --- R.TLMALGSLAVTK.N                         |
| 1210.5495                                                                                                                                                                                                                                                                                                                                                                                                                                                                | 1209.5422 | 1209.5513 | -7.54  | 21    | -   | 29   | 1    | 79 K.KYDEELEER.L                             |
| 1221.6211                                                                                                                                                                                                                                                                                                                                                                                                                                                                | 1220.6138 | 1220.6223 | -7.00  | 90    | -   | 99   | 0    | --- K.QMEQVAQLK.A                            |
| 1244.6184                                                                                                                                                                                                                                                                                                                                                                                                                                                                | 1243.6112 | 1243.6271 | -12.81 | 79    | -   | 89   | 0    | --- K.VPENPPSMVFK.Q                          |
| 1260.5941                                                                                                                                                                                                                                                                                                                                                                                                                                                                | 1259.5868 | 1259.6220 | -27.92 | 79    | -   | 89   | 0    | --- K.VPENPPSMVFK.Q + Oxidation (M)          |
| 1530.8219                                                                                                                                                                                                                                                                                                                                                                                                                                                                | 1529.8147 | 1529.8453 | -20.05 | 65    | -   | 78   | 0    | --- K.LVNSLYPEGSKPVK.V                       |
| 1546.6759                                                                                                                                                                                                                                                                                                                                                                                                                                                                | 1545.6686 | 1545.7021 | -21.68 | 109   | -   | 121  | 0    | --- K.TDMFQTVLDYEGK.D                        |
| 1562.6804                                                                                                                                                                                                                                                                                                                                                                                                                                                                | 1561.6731 | 1561.6970 | -15.31 | 109   | -   | 121  | 0    | --- K.TDMFQTVLDYEGK.D + Oxidation (M)        |
| 1713.7156                                                                                                                                                                                                                                                                                                                                                                                                                                                                | 1712.7084 | 1712.7365 | -16.45 | 141   | -   | 154  | 1    | --- K.NDGNRYGDPNWFMK.K                       |
| 1729.6720                                                                                                                                                                                                                                                                                                                                                                                                                                                                | 1728.6647 | 1728.7314 | -38.62 | 141   | -   | 154  | 1    | --- K.NDGNRYGDPNWFMK.K + Oxidation (M)       |
| 2095.0590                                                                                                                                                                                                                                                                                                                                                                                                                                                                | 2094.0517 | 2094.0681 | -7.82  | 30    | -   | 47   | 0    | --- R.LVEWIVVQCQPDVGRPDR.G                   |
| 2318.0530                                                                                                                                                                                                                                                                                                                                                                                                                                                                | 2317.0457 | 2317.0719 | -11.30 | 109   | -   | 128  | 1    | --- K.TDMFQTVLDYEGKDMAAVQR.T                 |
| 2334.0475                                                                                                                                                                                                                                                                                                                                                                                                                                                                | 2333.0402 | 2333.0668 | -11.39 | 109   | -   | 128  | 1    | --- K.TDMFQTVLDYEGKDMAAVQR.T + Oxidation (M) |
| <b>No match to:</b> 834.2970, 896.4857, 1004.5310, 1012.5411, 1022.5492, 1028.5188, 1042.4301, 1044.5361, 1064.4260, 1224.5717, 1226.6667, 1236.5985, 1238.5813, 1243.6046, 1266.5884, 1282.5857, 1532.5496, 1552.8113, 1568.6914, 1584.6583, 1701.5453, 1723.5328, 1761.7026, 1946.5805, 1959.9017, 2037.0076, 2051.3401, 2058.8658, 2078.4905, 2080.4178, 2088.0137, 2108.0341, 2110.0611, 2111.0488, 2116.0316, 2127.0376, 2279.0052, 2420.0215, 2459.0992, 2475.0828 |           |           |        |       |     |      |      |                                              |

### 2. SORCN MOUSE Mass: 21898 Score: 33 Expect: 7.6 Matches: 6

Sorcini OS=Mus musculus GN=Sri PE=1 SV=1

| Observed                                                                                                                                | Mr(expt)  | Mr(calc)  | ppm    | Start | End | Miss | Ions | Peptide                                                         |
|-----------------------------------------------------------------------------------------------------------------------------------------|-----------|-----------|--------|-------|-----|------|------|-----------------------------------------------------------------|
| 896.4857                                                                                                                                | 895.4784  | 895.4586  | 22.2   | 128   | -   | 135  | 0    | --- K.ALTTMGFR.L                                                |
| 1022.5492                                                                                                                               | 1021.5419 | 1021.4936 | 47.3   | 77    | -   | 84   | 0    | --- R <sub>2</sub> LMVSM LDR.D + Acetyl (N-term); Oxidation (M) |
| 1243.6046                                                                                                                               | 1242.5973 | 1242.6092 | -9.57  | 117   | -   | 127  | 0    | --- R <sub>2</sub> SGTVDPQELQK.A + Acetyl (N-term)              |
| 1546.6759                                                                                                                               | 1545.6686 | 1545.6844 | -10.19 | 154   | -   | 165  | 0    | --- K <sub>1</sub> ITFDDYIACCVK.L + Acetyl (N-term)             |
| 2037.0076                                                                                                                               | 2036.0004 | 2036.0725 | -35.41 | 128   | -   | 146  | 1    | --- K.ALTTMGFRLSPQTVNSVAK.R + Oxidation (M)                     |
| 2095.0590                                                                                                                               | 2094.0517 | 2094.0416 | 4.83   | 117   | -   | 135  | 1    | --- R.SGTVDPQELQKALTTMGFR.L + Oxidation (M)                     |
| <b>No match to:</b> 806.3542, 834.2970, 965.4665, 990.5630, 994.4527, 1004.5310, 1012.5411, 1028.5188, 1042.4301, 1044.5361, 1064.4260, |           |           |        |       |     |      |      |                                                                 |

1082.4225, 1203.6778, 1204.6653, 1210.5495, 1221.6211, 1224.5717, 1226.6667, 1236.5985, 1238.5813, 1244.6184, 1260.5941, 1266.5884, 1282.5857, 1530.8219, 1532.5496, 1552.8113, 1562.6804, 1568.6914, 1584.6583, 1701.5453, 1713.7156, 1723.5328, 1729.6720, 1761.7026, 1946.5805, 1959.9017, 2051.3401, 2058.8658, 2078.4905, 2080.4178, 2088.0137, 2108.0341, 2110.0611, 2111.0488, 2116.0316, 2127.0376, 2279.0052, 2318.0530, 2334.0475, 2420.0215, 2459.0992, 2475.0828

3. KLRA1\_MOUSE Mass: 31276 Score: 32 Expect: 10 Matches: 7

T-cell surface glycoprotein YE1/48 OS=Mus musculus GN=Klra1 PE=1 SV=1

**Observed Mr(expt) Mr(calc) ppm Start End Miss Ions Peptide**

1028.5188 1027.5115 1027.5298 -17.82 22 - 29 0 --- K.QVRPEETK.G + Acetyl (N-term)  
 1226.6667 1225.6595 1225.6415 14.6 127 - 137 0 --- K.TVLDSLQHTGR.G  
 1568.6914 1567.6841 1567.7487 -41.16 225 - 237 1 --- K.YNIRDGGCMLLSK.T + Acetyl (N-term)  
 2111.0488 2110.0415 2109.9394 48.4 240 - 256 1 --- R.LDNGNCDQVFICIGKR.L + Acetyl (N-term)  
 2127.0376 2126.0303 2126.0909 -28.46 207 - 224 1 --- K.DVAWIDNRPSKLALNTGK.Y + Acetyl (N-term)  
 2279.0052 2277.9980 2278.0998 -44.71 165 - 184 1 --- K.QACQSSLSLLKIDDEDELK.F  
 2420.0215 2419.0143 2418.9934 8.61 141 - 157 1 --- K.VYWFCYGMKCYFVMDR.K + 2 Oxidation (M)

**No match to:** 806.3542, 834.2970, 896.4857, 965.4665, 990.5630, 994.4527, 1004.5310, 1012.5411, 1022.5492, 1042.4301, 1044.5361, 1064.4260, 1082.4225, 1203.6778, 1204.6653, 1210.5495, 1221.6211, 1224.5717, 1236.5985, 1238.5813, 1243.6046, 1244.6184, 1260.5941, 1266.5884, 1282.5857, 1530.8219, 1532.5496, 1546.6759, 1552.8113, 1562.6804, 1584.6583, 1701.5453, 1713.7156, 1723.5328, 1729.6720, 1761.7026, 1946.5805, 1959.9017, 2037.0076, 2051.3401, 2058.8658, 2078.4905, 2080.4178, 2088.0137, 2095.0590, 2108.0341, 2110.0611, 2116.0316, 2318.0530, 2334.0475, 2459.0992, 2475.0828

4. CO6A1\_MOUSE Mass: 109562 Score: 32 Expect: 11 Matches: 12

Collagen alpha-1(VI) chain OS=Mus musculus GN=Col6a1 PE=2 SV=1

**Observed Mr(expt) Mr(calc) ppm Start End Miss Ions Peptide**

896.4857 895.4784 895.4988 -22.76 433 - 441 1 --- R.GTPGVGRGPR.G  
 990.5630 989.5557 989.5076 48.6 101 - 109 1 --- R.GLTRMPSGR.D + Oxidation (M)  
 1022.5492 1021.5419 1021.5556 -13.46 1012 - 1020 0 --- R.GVLYQTVSR.K  
 1028.5188 1027.5115 1027.4644 45.8 125 - 133 0 --- K.GTYTDCAIK.K  
 1226.6667 1225.6595 1225.6343 20.5 114 - 124 1 --- K.ASVDAVKYFGK.G + Acetyl (N-term)  
 1568.6914 1567.6841 1567.7406 -36.00 788 - 800 0 --- K.ENYAELDDGFLK.N + Acetyl (N-term)  
 2037.0076 2036.0004 2035.9997 0.34 166 - 184 1 --- K.EPCGGLEDVNEAKHLGIK.V  
 2088.0137 2087.0064 2086.9782 13.5 693 - 710 0 --- K.LQWMAGGTFTGEALQYTR.D + Acetyl (N-term); Oxidation (M)  
 2108.0341 2107.0268 2106.9715 26.3 325 - 345 1 --- R.GIDGVDGMKGETGYPLPGCK.G  
 2110.0611 2109.0538 2109.0491 2.24 456 - 477 1 --- R.EGPVGIPGDSGEAGPIGPKGYR.G  
 2116.0316 2115.0243 2114.9691 26.1 280 - 300 0 --- K.GEAGDPGRPGDLPGVGYQGMK.G + Acetyl (N-term); Oxidation (M)  
 2318.0530 2317.0457 2317.0036 18.2 508 - 530 0 --- R\_GEDGPPNGTEGFPGFPGYGNR.G + Acetyl (N-term)

**No match to:** 806.3542, 834.2970, 965.4665, 994.4527, 1004.5310, 1012.5411, 1042.4301, 1044.5361, 1064.4260, 1082.4225, 1203.6778, 1204.6653, 1210.5495, 1221.6211, 1224.5717, 1236.5985, 1238.5813, 1243.6046, 1244.6184, 1260.5941, 1266.5884, 1282.5857, 1530.8219, 1532.5496, 1546.6759, 1552.8113, 1562.6804, 1584.6583, 1701.5453, 1713.7156, 1723.5328, 1729.6720, 1761.7026, 1946.5805, 1959.9017, 2051.3401, 2058.8658, 2078.4905, 2080.4178, 2095.0590, 2111.0488, 2127.0376, 2279.0052, 2334.0475, 2420.0215, 2459.0992, 2475.0828

5. NOP16\_MOUSE Mass: 21183 Score: 32 Expect: 11 Matches: 6

Nucleolar protein 16 OS=Mus musculus GN=Nop16 PE=2 SV=1

| Observed  | Mr(expt)  | Mr(calc)  | ppm    | Start | End   | Miss | Ions | Peptide                                               |
|-----------|-----------|-----------|--------|-------|-------|------|------|-------------------------------------------------------|
| 1028.5188 | 1027.5115 | 1027.4611 | 49.1   | 139   | - 146 | 0    | --   | K.NYYQDTPK.Q                                          |
| 1236.5985 | 1235.5912 | 1235.6160 | -20.04 | 41    | - 50  | 1    | --   | R.HAWDHTKSVR.Q                                        |
| 1959.9017 | 1958.8945 | 1958.9414 | -23.97 | 158   | - 173 | 0    | --   | R.FYPTIEWQAFIDSLQSK.K                                 |
| 2088.0137 | 2087.0064 | 2087.0364 | -14.36 | 158   | - 174 | 1    | --   | R.FYPTIEWQAFIDSLQSKK.M                                |
| 2110.0611 | 2109.0538 | 2109.0710 | -8.16  | 51    | - 69  | 1    | --   | R <sub>2</sub> QNLAEMLAMDPNKAVPLR.K + Acetyl (N-term) |
| 2116.0316 | 2115.0243 | 2115.0425 | -8.61  | 157   | - 173 | 1    | --   | K.RFYPTIEWQAFIDSLQSK.K                                |

**No match to:** 806.3542, 834.2970, 896.4857, 965.4665, 990.5630, 994.4527, 1004.5310, 1012.5411, 1022.5492, 1042.4301, 1044.5361, 1064.4260, 1082.4225, 1203.6778, 1204.6653, 1210.5495, 1221.6211, 1224.5717, 1226.6667, 1238.5813, 1243.6046, 1244.6184, 1260.5941, 1266.5884, 1282.5857, 1530.8219, 1532.5496, 1546.6759, 1552.8113, 1562.6804, 1568.6914, 1584.6583, 1701.5453, 1713.7156, 1723.5328, 1729.6720, 1761.7026, 1946.5805, 2037.0076, 2051.3401, 2058.8658, 2078.4905, 2080.4178, 2095.0590, 2108.0341, 2111.0488, 2127.0376, 2279.0052, 2318.0530, 2334.0475, 2420.0215, 2459.0992, 2475.0828

**6. PCNT\_MOUSE** Mass: 220085 Score: 29 Expect: 21 Matches: 15

Pericentrin OS=Mus musculus GN=Pcnt PE=1 SV=1

| Observed  | Mr(expt)  | Mr(calc)  | ppm    | Start | End    | Miss | Ions | Peptide                                                          |
|-----------|-----------|-----------|--------|-------|--------|------|------|------------------------------------------------------------------|
| 806.3542  | 805.3470  | 805.3640  | -21.11 | 188   | - 193  | 0    | --   | K.EEMALR.S + Acetyl (N-term); Oxidation (M)                      |
| 1064.4260 | 1063.4187 | 1063.4240 | -4.95  | 1     | - 8    | 0    | --   | -MEDEQEQR.R                                                      |
| 1203.6778 | 1202.6705 | 1202.6547 | 13.1   | 1789  | - 1798 | 0    | --   | K.TTWDVIDIHK.N                                                   |
| 1204.6653 | 1203.6580 | 1203.6863 | -23.52 | 262   | - 271  | 1    | --   | K.VELEKIFQAK.H                                                   |
| 1210.5495 | 1209.5422 | 1209.5084 | 27.9   | 1254  | - 1263 | 0    | 18   | R.QFMDDQAAER.D                                                   |
| 1226.6667 | 1225.6595 | 1225.6778 | -15.00 | 1084  | - 1092 | 1    | --   | K.QQELLERLR.E + Acetyl (N-term)                                  |
| 1236.5985 | 1235.5912 | 1235.5353 | 45.2   | 539   | - 547  | 1    | --   | R <sub>2</sub> FEHRESSMR.H + Acetyl (N-term); Oxidation (M)      |
| 1238.5813 | 1237.5740 | 1237.6051 | -25.12 | 771   | - 780  | 0    | --   | R <sub>2</sub> QHAEELQSVR.D + Acetyl (N-term)                    |
| 1244.6184 | 1243.6112 | 1243.6482 | -29.78 | 1472  | - 1482 | 0    | --   | K <sub>2</sub> LQSELSLMGPK.V + Acetyl (N-term)                   |
| 1260.5941 | 1259.5868 | 1259.6431 | -44.67 | 1472  | - 1482 | 0    | --   | K <sub>2</sub> LQSELSLMGPK.V + Acetyl (N-term); Oxidation (M)    |
| 1266.5884 | 1265.5811 | 1265.6404 | -46.88 | 633   | - 642  | 1    | --   | K <sub>2</sub> FAKEQDAFLR.D + Acetyl (N-term)                    |
| 1546.6759 | 1545.6686 | 1545.6664 | 1.45   | 1072  | - 1083 | 1    | --   | R <sub>2</sub> HRNEEMAQAMQK.Q + Acetyl (N-term); 2 Oxidation (M) |
| 2058.8658 | 2057.8585 | 2057.9510 | -44.92 | 754   | - 769  | 1    | --   | K <sub>2</sub> ESCHREMLTQELENLK.R + Acetyl (N-term)              |
| 2108.0341 | 2107.0268 | 2107.0143 | 5.95   | 1569  | - 1587 | 0    | --   | R <sub>2</sub> EAEVEAMASQIQEFAATLK.A + Acetyl (N-term)           |
| 2116.0316 | 2115.0243 | 2115.1072 | -39.19 | 272   | - 290  | 1    | --   | K.HEAEVSLKNLEAQHQAIAK.K                                          |

**No match to:** 834.2970, 896.4857, 965.4665, 990.5630, 994.4527, 1004.5310, 1012.5411, 1022.5492, 1028.5188, 1042.4301, 1044.5361, 1082.4225, 1221.6211, 1224.5717, 1243.6046, 1282.5857, 1530.8219, 1532.5496, 1552.8113, 1562.6804, 1568.6914, 1584.6583, 1701.5453, 1713.7156, 1723.5328, 1729.6720, 1761.7026, 1946.5805, 1959.9017, 2037.0076, 2051.3401, 2078.4905, 2080.4178, 2088.0137, 2095.0590, 2110.0611, 2111.0488, 2127.0376, 2279.0052, 2318.0530, 2334.0475, 2420.0215, 2459.0992, 2475.0828

**7. RM38\_MOUSE** Mass: 45287 Score: 27 Expect: 30 Matches: 8

39S ribosomal protein L38, mitochondrial OS=Mus musculus GN=Mrpl38 PE=2 SV=2

| Observed  | Mr(expt)  | Mr(calc)  | ppm    | Start | End   | Miss | Ions | Peptide                                      |
|-----------|-----------|-----------|--------|-------|-------|------|------|----------------------------------------------|
| 1012.5411 | 1011.5338 | 1011.5614 | -27.27 | 108   | - 114 | 1    | 1    | K.HFLRELRL.A + Acetyl (N-term)               |
| 1221.6211 | 1220.6138 | 1220.6414 | -22.64 | 356   | - 364 | 1    | --   | K <sub>2</sub> RFPHQPLR.Y + Acetyl (N-term)  |
| 1224.5717 | 1223.5644 | 1223.5975 | -27.06 | 297   | - 305 | 1    | --   | R.TFRTDFDYK.R                                |
| 1244.6184 | 1243.6112 | 1243.6156 | -3.60  | 112   | - 121 | 1    | --   | R.ELRANVEEER.A                               |
| 1266.5884 | 1265.5811 | 1265.6081 | -21.33 | 297   | - 305 | 1    | --   | R <sub>2</sub> TFRTDFDYK.R + Acetyl (N-term) |

2058.8658 2057.8585 2057.9265 -33.05 323 - 338 0 --- R<sub>2</sub>WDDSVTHTFHQLLDMR.E + Acetyl (N-term); Oxidation (M)

2095.0590 2094.0517 2094.1051 -25.49 339 - 355 1 --- R.EPVFEFVRRPPYHPKQK.R

2110.0611 2109.0538 2109.0048 23.2 29 - 47 0 --- R.TPPLGMPNEDIDVSNLER.L + Oxidation (M)

**No match to:** 806.3542, 834.2970, 896.4857, 965.4665, 990.5630, 994.4527, 1004.5310, 1022.5492, 1028.5188, 1042.4301, 1044.5361, 1064.4260, 1082.4225, 1203.6778, 1204.6653, 1210.5495, 1226.6667, 1236.5985, 1238.5813, 1243.6046, 1260.5941, 1282.5857, 1530.8219, 1532.5496, 1546.6759, 1552.8113, 1562.6804, 1568.6914, 1584.6583, 1701.5453, 1713.7156, 1723.5328, 1729.6720, 1761.7026, 1946.5805, 1959.9017, 2037.0076, 2051.3401, 2078.4905, 2080.4178, 2088.0137, 2108.0341, 2111.0488, 2116.0316, 2127.0376, 2279.0052, 2318.0530, 2334.0475, 2420.0215, 2459.0992, 2475.0828

**8. RT24\_MOUSE** Mass: 19174 Score: 26 Expect: 37 Matches: 5

28S ribosomal protein S24, mitochondrial OS=Mus musculus GN=Mrps24 PE=2 SV=1

**Observed Mr(expt) Mr(calc) ppm Start End Miss Ions Peptide**

965.4665 964.4592 964.4436 16.1 1 - 8 0 --- -MAWSASVR.G + Acetyl (N-term); Oxidation (M)

1022.5492 1021.5419 1021.5920 -49.06 153 - 161 0 --- R.LHLQTVPSK.V

1959.9017 1958.8945 1958.9304 -18.36 95 - 111 0 --- K.FMMGTFPGCLADQIVLK.R + 2 Oxidation (M)

2088.0137 2087.0064 2087.0254 -9.10 94 - 111 1 --- R.KFMMGTFPGCLADQIVLK.R + 2 Oxidation (M)

2116.0316 2115.0243 2115.0315 -3.42 95 - 112 1 --- K.FMMGTFPGCLADQIVLK.R + 2 Oxidation (M)

**No match to:** 806.3542, 834.2970, 896.4857, 990.5630, 994.4527, 1004.5310, 1012.5411, 1028.5188, 1042.4301, 1044.5361, 1064.4260, 1082.4225, 1203.6778, 1204.6653, 1210.5495, 1221.6211, 1224.5717, 1226.6667, 1236.5985, 1238.5813, 1243.6046, 1244.6184, 1260.5941, 1266.5884, 1282.5857, 1530.8219, 1532.5496, 1546.6759, 1552.8113, 1562.6804, 1568.6914, 1584.6583, 1701.5453, 1713.7156, 1723.5328, 1729.6720, 1761.7026, 1946.5805, 2037.0076, 2051.3401, 2058.8658, 2078.4905, 2080.4178, 2095.0590, 2108.0341, 2110.0611, 2111.0488, 2127.0376, 2279.0052, 2318.0530, 2334.0475, 2420.0215, 2459.0992, 2475.0828

**9. MBRL\_MOUSE** Mass: 63805 Score: 24 Expect: 59 Matches: 9

Membralin OS=Mus musculus GN=ORF61 PE=1 SV=2

**Observed Mr(expt) Mr(calc) ppm Start End Miss Ions Peptide**

990.5630 989.5557 989.5069 49.3 161 - 168 0 --- K.FELDIEPK.V

1012.5411 1011.5338 1011.5614 -27.28 104 - 111 1 6 R.WPREGVLR.V

1022.5492 1021.5419 1021.5749 -32.32 43 - 50 0 --- R.LFHALFFK.M

1224.5717 1223.5644 1223.6081 -35.68 92 - 101 0 --- R.SPINCLEHVR.D

1266.5884 1265.5811 1265.6186 -29.67 92 - 101 0 --- R<sub>2</sub>SPINCLEHVR.D + Acetyl (N-term)

2088.0137 2087.0064 2086.9603 22.1 1 - 24 0 --- -MSEHAAAPGPGPNGGGGGAAPVR.G + Oxidation (M)

2108.0341 2107.0268 2106.9781 23.1 398 - 412 0 --- R.FFYLYHFAFYAYHYR.F

2111.0488 2110.0415 2109.9877 25.5 276 - 292 1 --- R<sub>2</sub>NVVSGEHYRFVSMWMART + Acetyl (N-term)

2127.0376 2126.0303 2125.9826 22.5 276 - 292 1 --- R<sub>2</sub>NVVSGEHYRFVSMWMART + Acetyl (N-term); Oxidation (M)

**No match to:** 806.3542, 834.2970, 896.4857, 965.4665, 994.4527, 1004.5310, 1028.5188, 1042.4301, 1044.5361, 1064.4260, 1082.4225, 1203.6778, 1204.6653, 1210.5495, 1221.6211, 1226.6667, 1236.5985, 1238.5813, 1243.6046, 1244.6184, 1260.5941, 1282.5857, 1530.8219, 1532.5496, 1546.6759, 1552.8113, 1562.6804, 1568.6914, 1584.6583, 1701.5453, 1713.7156, 1723.5328, 1729.6720, 1761.7026, 1946.5805, 1959.9017, 2037.0076, 2051.3401, 2058.8658, 2078.4905, 2080.4178, 2095.0590, 2110.0611, 2116.0316, 2279.0052, 2318.0530, 2334.0475, 2420.0215, 2459.0992, 2475.0828

**10. KLC4\_MOUSE** Mass: 69084 Score: 24 Expect: 66 Matches: 9

Kinesin light chain 4 OS=Mus musculus GN=Klc4 PE=1 SV=1

| Observed  | Mr(expt)  | Mr(calc)  | ppm    | Start | End | Miss | Ions | Peptide                                                    |
|-----------|-----------|-----------|--------|-------|-----|------|------|------------------------------------------------------------|
| 1004.5310 | 1003.5237 | 1003.5563 | -32.46 | 469   | -   | 476  | 1 -- | <u>K</u> .NLGALYRR.Q + Acetyl (N-term)                     |
| 1204.6653 | 1203.6580 | 1203.6347 | 19.4   | 17    | -   | 27   | 0 -- | R.LSQEELGSTK.V                                             |
| 1210.5495 | 1209.5422 | 1209.5725 | -25.05 | 607   | -   | 619  | 0 -- | R.GLSASTVDLSSSS.-                                          |
| 1243.6046 | 1242.5973 | 1242.6568 | -47.88 | 506   | -   | 517  | 1 -- | K.VAELLGEGDGRK.A                                           |
| 1244.6184 | 1243.6112 | 1243.6408 | -23.85 | 495   | -   | 505  | 1 -- | R. <u>K</u> QGTDPISQTK.V + Acetyl (N-term)                 |
| 1530.8219 | 1529.8147 | 1529.7573 | 37.5   | 133   | -   | 145  | 1 -- | R. <u>S</u> EQAVAQLEEEKK.H + Acetyl (N-term)               |
| 1546.6759 | 1545.6686 | 1545.7344 | -42.58 | 480   | -   | 492  | 0 -- | <u>K</u> .LEAAETLEECALR.S + Acetyl (N-term)                |
| 1562.6804 | 1561.6731 | 1561.7406 | -43.20 | 573   | -   | 586  | 0 -- | <u>K</u> .LQGTPEPRSSSSMKR + Acetyl (N-term); Oxidation (M) |
| 2108.0341 | 2107.0268 | 2107.1021 | -35.74 | 271   | -   | 289  | 1 -- | <u>K</u> .EAAHLLNDALSIRESTLGR.D + Acetyl (N-term)          |

**No match to:** 806.3542, 834.2970, 896.4857, 965.4665, 990.5630, 994.4527, 1012.5411, 1022.5492, 1028.5188, 1042.4301, 1044.5361, 1064.4260, 1082.4225, 1203.6778, 1221.6211, 1224.5717, 1226.6667, 1236.5985, 1238.5813, 1260.5941, 1266.5884, 1282.5857, 1532.5496, 1552.8113, 1568.6914, 1584.6583, 1701.5453, 1713.7156, 1723.5328, 1729.6720, 1761.7026, 1946.5805, 1959.9017, 2037.0076, 2051.3401, 2058.8658, 2078.4905, 2080.4178, 2088.0137, 2095.0590, 2110.0611, 2111.0488, 2116.0316, 2127.0376, 2279.0052, 2318.0530, 2334.0475, 2420.0215, 2459.0992, 2475.0828

#### Search Parameters

Type of search : MS/MS Ion Search  
 Enzyme : Trypsin  
 Fixed modifications : Carbamidomethyl (C)  
 Variable modifications : Acetyl (N-term), Oxidation (M)  
 Mass values : Monoisotopic  
 Protein Mass : Unrestricted  
 Peptide Mass Tolerance :  $\pm 50$  ppm  
 Fragment Mass Tolerance:  $\pm 0.5$  Da  
 Max Missed Cleavages : 1  
 Instrument type : MALDI-TOF-TOF  
 Query1 (806.3542,1+) : <no title>  
 Query2 (834.2970,1+) : <no title>  
 Query3 (896.4857,1+) : <no title>  
 Query4 (965.4665,1+) : <no title>  
 Query5 (990.5630,1+) : <no title>  
 Query6 (994.4527,1+) : <no title>  
 Query7 (1004.5310,1+) : <no title>  
 Query8 (1012.5411,1+) : <no title>  
 Query9 (1022.5492,1+) : <no title>  
 Query10 (1028.5188,1+) : <no title>  
 Query11 (1042.4301,1+) : <no title>  
 Query12 (1044.5361,1+) : <no title>  
 Query13 (1064.4260,1+) : <no title>  
 Query14 (1082.4225,1+) : <no title>  
 Query15 (1203.6778,1+) : <no title>  
 Query16 (1204.6653,1+) : <no title>  
 Query17 (1210.5495,1+) : <no title>

Query18 (1221.6211,1+) : <no title>  
Query19 (1224.5717,1+) : <no title>  
Query20 (1226.6667,1+) : <no title>  
Query21 (1236.5985,1+) : <no title>  
Query22 (1238.5813,1+) : <no title>  
Query23 (1243.6046,1+) : <no title>  
Query24 (1244.6184,1+) : <no title>  
Query25 (1260.5941,1+) : <no title>  
Query26 (1266.5884,1+) : <no title>  
Query27 (1282.5857,1+) : <no title>  
Query28 (1530.8219,1+) : <no title>  
Query29 (1532.5496,1+) : <no title>  
Query30 (1546.6759,1+) : <no title>  
Query31 (1552.8113,1+) : <no title>  
Query32 (1562.6804,1+) : <no title>  
Query33 (1568.6914,1+) : <no title>  
Query34 (1584.6583,1+) : <no title>  
Query35 (1701.5453,1+) : <no title>  
Query36 (1713.7156,1+) : <no title>  
Query37 (1723.5328,1+) : <no title>  
Query38 (1729.6720,1+) : <no title>  
Query39 (1761.7026,1+) : <no title>  
Query40 (1946.5805,1+) : <no title>  
Query41 (1959.9017,1+) : <no title>  
Query42 (2037.0076,1+) : <no title>  
Query43 (2051.3401,1+) : <no title>  
Query44 (2058.8658,1+) : <no title>  
Query45 (2078.4905,1+) : <no title>  
Query46 (2080.4178,1+) : <no title>  
Query47 (2088.0137,1+) : <no title>  
Query48 (2095.0590,1+) : <no title>  
Query49 (2108.0341,1+) : <no title>  
Query50 (2110.0611,1+) : <no title>  
Query51 (2111.0488,1+) : <no title>  
Query52 (2116.0316,1+) : <no title>  
Query53 (2127.0376,1+) : <no title>  
Query54 (2279.0052,1+) : <no title>  
Query55 (2318.0530,1+) : <no title>  
Query56 (2334.0475,1+) : <no title>  
Query57 (2420.0215,1+) : <no title>  
Query58 (2459.0992,1+) : <no title>  
Query59 (2475.0828,1+) : <no title>
