# Supplementary material for: Proteomic analysis of intestinal tissues from mice fed with Lentinula edodes-derived polysaccharides
Source: Royal Society of Chemistry journal article supplement (doi:10.1039/c5fo00904a), 2015-09-08
Supplement: c5fo00904a2.pdf [file c5fo00904a2.pdf]

**MASCOT**  
**SCIENCE** Mascot Search Results

User :  
Email :  
Search title : Auto submitted by BioTools  
Database : SwissProt 57.15 (515203 sequences; 181334896 residues)  
Taxonomy : Mus. (16281 sequences)  
Timestamp : 22 Nov 2010 at 05:06:54 GMT  
Warning : A Peptide summary report will usually give a much clearer picture of MS/MS search results.  
Top Score : 207 for PDIA1\_MOUSE, Protein disulfide-isomerase OS=Mus musculus GN=P4hb PE=1 SV=1

### Mascot Score Histogram

Protein score is  $-10 \cdot \log(P)$ , where P is the probability that the observed match is a random event.

Protein scores greater than 55 are significant ( $p < 0.05$ ).

Protein scores are derived from ions scores as a non-probabilistic basis for ranking protein hits.

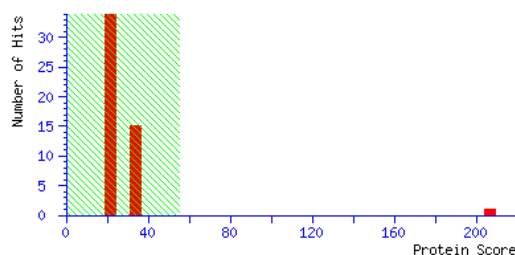

### Protein Summary Report

#### Index

| Accession                       | Mass   | Score | Description                                                                                    |
|---------------------------------|--------|-------|------------------------------------------------------------------------------------------------|
| 1. <a href="#">PDIA1_MOUSE</a>  | 57507  | 207   | Protein disulfide-isomerase OS=Mus musculus GN=P4hb PE=1 SV=1                                  |
| 2. <a href="#">KLC1_MOUSE</a>   | 61868  | 37    | Kinesin light chain 1 OS=Mus musculus GN=Klc1 PE=1 SV=3                                        |
| 3. <a href="#">K1143_MOUSE</a>  | 17525  | 33    | Uncharacterized protein KIAA1143 homolog OS=Mus musculus PE=1 SV=1                             |
| 4. <a href="#">CCD46_MOUSE</a>  | 113119 | 33    | Coiled-coil domain-containing protein 46 OS=Mus musculus GN=Ccdc46 PE=2 SV=2                   |
| 5. <a href="#">CCPG1_MOUSE</a>  | 86757  | 31    | Cell cycle progression protein 1 OS=Mus musculus GN=Ccp1 PE=1 SV=2                             |
| 6. <a href="#">PTC1_MOUSE</a>   | 160711 | 30    | Protein patched homolog 1 OS=Mus musculus GN=Ptch1 PE=2 SV=1                                   |
| 7. <a href="#">AMOL2_MOUSE</a>  | 85454  | 29    | Angiotensin-like protein 2 OS=Mus musculus GN=Amotl2 PE=2 SV=1                                 |
| 8. <a href="#">MP2K4_MOUSE</a>  | 44542  | 29    | Dual specificity mitogen-activated protein kinase kinase 4 OS=Mus musculus GN=Map2k4 PE=1 SV=2 |
| 9. <a href="#">UBIQ_MOUSE</a>   | 8560   | 29    | Ubiquitin OS=Mus musculus GN=Rps27a PE=1 SV=1                                                  |
| 10. <a href="#">RHG20_MOUSE</a> | 132887 | 29    | Rho GTPase-activating protein 20 OS=Mus musculus GN=Arhgap20 PE=2 SV=1                         |

#### Results List

1. [PDIA1\\_MOUSE](#) Mass: 57507 Score: 207 Expect: 3.2e-017 Matches: 9

Protein disulfide-isomerase OS=Mus musculus GN=P4hb PE=1 SV=1

| Observed  | Mr(expt)  | Mr(calc)  | ppm    | Start | End   | Miss | Ions | Peptide                 |
|-----------|-----------|-----------|--------|-------|-------|------|------|-------------------------|
| 910.4295  | 909.4223  | 909.4345  | -13.41 | 447   | - 454 | 0    | 7    | K.FFPASADR.T            |
| 962.4472  | 961.4399  | 961.4440  | -4.20  | 341   | - 347 | 0    | 7    | K.ITEFCHR.F             |
| 988.4860  | 987.4788  | 987.4807  | -2.01  | 311   | - 318 | 1    | --   | K.KEECPAVR.L            |
| 1002.5491 | 1001.5418 | 1001.5505 | -8.71  | 72    | - 80  | 1    | --   | K.LKAEGSEIR.L           |
| 1655.7423 | 1654.7350 | 1654.7587 | -14.32 | 211   | - 224 | 1    | --   | K.FDEGRNNFEGETK.E       |
| 1780.8137 | 1779.8064 | 1779.8275 | -11.87 | 84    | - 99  | 0    | 42   | K.VDATEESDLAQYGV.R.G    |
| 1794.8568 | 1793.8495 | 1793.9200 | -39.28 | 373   | - 388 | 1    | --   | K.VLVGANFEEVAFDEKK.N    |
| 1833.8947 | 1832.8875 | 1832.9057 | -9.96  | 288   | - 302 | 0    | 36   | K.ILFIFIDSDHTDNQR.I     |
| 2353.0895 | 2352.0822 | 2352.1056 | -9.95  | 329   | - 347 | 1    | --   | K.YKPESDELTAEKITEFCHR.F |

No match to: 1081.5038, 1732.8452, 1912.8891, 1987.0118, 1998.9932

2. KLC1\_MOUSE Mass: 61868 Score: 37 Expect: 3.3 Matches: 3

Kinesin light chain 1 OS=Mus musculus GN=Klcl PE=1 SV=3

| Observed  | Mr(expt)  | Mr(calc)  | ppm    | Start | End   | Miss | Ions | Peptide              |
|-----------|-----------|-----------|--------|-------|-------|------|------|----------------------|
| 910.4295  | 909.4223  | 909.4668  | -48.99 | 495   | - 502 | 0    | --   | K.QGLDNVHK.Q         |
| 1002.5491 | 1001.5418 | 1001.4964 | 45.3   | 313   | - 320 | 1    | --   | K.EAEPLCKR.A         |
| 1780.8137 | 1779.8064 | 1779.8461 | -22.31 | 476   | - 491 | 1    | 19   | R.QGKFEAAETLEEAAMR.S |

No match to: 962.4472, 988.4860, 1081.5038, 1655.7423, 1732.8452, 1794.8568, 1833.8947, 1912.8891, 1987.0118, 1998.9932, 2353.0895

3. K1143\_MOUSE Mass: 17525 Score: 33 Expect: 7.8 Matches: 3

Uncharacterized protein KIAA1143 homolog OS=Mus musculus PE=1 SV=1

| Observed  | Mr(expt)  | Mr(calc)  | ppm    | Start | End   | Miss | Ions | Peptide              |
|-----------|-----------|-----------|--------|-------|-------|------|------|----------------------|
| 910.4295  | 909.4223  | 909.4226  | -0.34  | 109   | - 117 | 0    | --   | K.CSGLTASSK.K        |
| 988.4860  | 987.4788  | 987.5237  | -45.47 | 29    | - 37  | 1    | --   | K.EGPTVETKK.I        |
| 1833.8947 | 1832.8875 | 1832.9533 | -35.93 | 5     | - 20  | 0    | --   | R.NQVSYVRPAEPAFLSR.F |

No match to: 962.4472, 1002.5491, 1081.5038, 1655.7423, 1732.8452, 1780.8137, 1794.8568, 1912.8891, 1987.0118, 1998.9932, 2353.0895

4. CCD46\_MOUSE Mass: 113119 Score: 33 Expect: 8.5 Matches: 5

Coiled-coil domain-containing protein 46 OS=Mus musculus GN=Ccdc46 PE=2 SV=2

| Observed  | Mr(expt)  | Mr(calc)  | ppm    | Start | End   | Miss | Ions | Peptide                            |
|-----------|-----------|-----------|--------|-------|-------|------|------|------------------------------------|
| 988.4860  | 987.4788  | 987.4872  | -8.59  | 290   | - 297 | 0    | --   | K.NNELEELK.I                       |
| 1655.7423 | 1654.7350 | 1654.7872 | -31.56 | 608   | - 621 | 1    | --   | R.QVEVNSEKVGEMK.E + Oxidation (M)  |
| 1732.8452 | 1731.8380 | 1731.8210 | 9.81   | 416   | - 430 | 0    | --   | R.VQQLMGEAENSLQR.Q + Oxidation (M) |
| 1794.8568 | 1793.8495 | 1793.9271 | -43.28 | 940   | - 954 | 1    | --   | R.ASILQEELTTYQSRR.-                |
| 2353.0895 | 2352.0822 | 2352.1276 | -19.30 | 391   | - 410 | 1    | --   | R.LSKMEADYVVMQSTNHHMIK.E           |

No match to: 910.4295, 962.4472, 1002.5491, 1081.5038, 1780.8137, 1833.8947, 1912.8891, 1987.0118, 1998.9932

5. CCPG1\_MOUSE Mass: 86757 Score: 31 Expect: 12 Matches: 4

Cell cycle progression protein 1 OS=Mus musculus GN=Ccp1 PE=1 SV=2

| Observed  | Mr(expt)  | Mr(calc)  | ppm   | Start | End   | Miss | Ions | Peptide                             |
|-----------|-----------|-----------|-------|-------|-------|------|------|-------------------------------------|
| 1732.8452 | 1731.8380 | 1731.8389 | -0.57 | 482   | - 496 | 1    | --   | K.ETFLGTVKETFDAMK.N + Oxidation (M) |

1780.8137 1779.8064 1779.8097 -1.88 279 - 292 1 0 K.ENLERCWTVTESEK.I  
 1912.8891 1911.8818 1911.9519 -36.68 674 - 689 0 -- K.ELDQFISPPFPNGVFR.H  
 1987.0118 1986.0045 1985.9404 32.3 284 - 299 1 -- R.CWTVTESEKITFETQK.K  
**No match to:** 910.4295, 962.4472, 988.4860, 1002.5491, 1081.5038, 1655.7423, 1794.8568, 1833.8947, 1998.9932, 2353.0895

6. PTC1\_MOUSE Mass: 160711 Score: 30 Expect: 15 Matches: 5

Protein patched homolog 1 OS=Mus musculus GN=Ptch1 PE=2 SV=1

| Observed  | Mr(expt)  | Mr(calc)  | ppm    | Start | End   | Miss | Ions | Peptide                            |
|-----------|-----------|-----------|--------|-------|-------|------|------|------------------------------------|
| 962.4472  | 961.4399  | 961.4691  | -30.34 | 185   | - 191 | 0    | --   | K.LEHLCKYK.S                       |
| 1081.5038 | 1080.4965 | 1080.5175 | -19.37 | 174   | - 181 | 0    | --   | R.VHVYMYNR.Q                       |
| 1780.8137 | 1779.8064 | 1779.8719 | -36.83 | 242   | - 255 | 0    | --   | R.WTNFDPLEFLEELK.K                 |
| 1912.8891 | 1911.8818 | 1911.9036 | -11.41 | 256   | - 270 | 1    | --   | K.KINYQVDSWEMLNK.A + Oxidation (M) |
| 1998.9932 | 1997.9859 | 1997.9516 | 17.1   | 854   | - 871 | 1    | --   | R.IMPNNYKNGSDDGVLAYK.L             |

**No match to:** 910.4295, 988.4860, 1002.5491, 1655.7423, 1732.8452, 1794.8568, 1833.8947, 1987.0118, 2353.0895

7. AMOL2\_MOUSE Mass: 85454 Score: 29 Expect: 20 Matches: 4

Angiotensin-like protein 2 OS=Mus musculus GN=Amtl2 PE=2 SV=1

| Observed  | Mr(expt)  | Mr(calc)  | ppm    | Start | End   | Miss | Ions | Peptide                     |
|-----------|-----------|-----------|--------|-------|-------|------|------|-----------------------------|
| 910.4295  | 909.4223  | 909.3797  | 46.9   | 376   | - 382 | 1    | --   | K.MDGEMRR.L + Oxidation (M) |
| 1002.5491 | 1001.5418 | 1001.5505 | -8.71  | 545   | - 552 | 1    | --   | R.LSEQLREK.E                |
| 1780.8137 | 1779.8064 | 1779.8508 | -24.96 | 575   | - 591 | 1    | --   | R.AMRQFAMDAAATAAAQR.D       |
| 1833.8947 | 1832.8875 | 1832.9744 | -47.45 | 15    | - 29  | 1    | --   | R.LIQEQLRYGNLTETR.T         |

**No match to:** 962.4472, 988.4860, 1081.5038, 1655.7423, 1732.8452, 1794.8568, 1912.8891, 1987.0118, 1998.9932, 2353.0895

8. MP2K4\_MOUSE Mass: 44542 Score: 29 Expect: 20 Matches: 3

Dual specificity mitogen-activated protein kinase kinase 4 OS=Mus musculus GN=Map2k4 PE=1 SV=2

| Observed  | Mr(expt)  | Mr(calc)  | ppm    | Start | End   | Miss | Ions | Peptide                              |
|-----------|-----------|-----------|--------|-------|-------|------|------|--------------------------------------|
| 1780.8137 | 1779.8064 | 1779.8059 | 0.26   | 382   | - 397 | 0    | 1    | K.ILDQMPATPSSPMYVD.- + Oxidation (M) |
| 1833.8947 | 1832.8875 | 1832.9494 | -33.82 | 358   | - 371 | 1    | --   | K.ELLKHPFILMYEER.T + Oxidation (M)   |
| 2353.0895 | 2352.0822 | 2352.1935 | -47.31 | 53    | - 73  | 1    | --   | K.STARFTLNPNTTGVQNPHER.L             |

**No match to:** 910.4295, 962.4472, 988.4860, 1002.5491, 1081.5038, 1655.7423, 1732.8452, 1794.8568, 1912.8891, 1987.0118, 1998.9932

9. UBIQ\_MOUSE Mass: 8560 Score: 29 Expect: 20 Matches: 2

Ubiquitin OS=Mus musculus GN=Rps27a PE=1 SV=1

| Observed  | Mr(expt)  | Mr(calc)  | ppm    | Start | End  | Miss | Ions | Peptide                |
|-----------|-----------|-----------|--------|-------|------|------|------|------------------------|
| 1081.5038 | 1080.4965 | 1080.5451 | -44.96 | 55    | - 63 | 0    | --   | R.TLSDYNIQK.E          |
| 1987.0118 | 1986.0045 | 1986.0521 | -23.95 | 12    | - 29 | 1    | --   | K.TITLEVEPSDTIENVKAK.I |

**No match to:** 910.4295, 962.4472, 988.4860, 1002.5491, 1655.7423, 1732.8452, 1780.8137, 1794.8568, 1833.8947, 1912.8891, 1998.9932, 2353.0895

10. RHG20\_MOUSE Mass: 132887 Score: 29 Expect: 20 Matches: 5

Rho GTPase-activating protein 20 OS=Mus musculus GN=Arhgap20 PE=2 SV=1

| Observed | Mr(expt) | Mr(calc) | ppm | Start | End | Miss | Ions | Peptide |
|----------|----------|----------|-----|-------|-----|------|------|---------|
|----------|----------|----------|-----|-------|-----|------|------|---------|

910.4295 909.4223 909.4443 -24.26 738 - 744 1 --- R.KDEDYLK.Q  
1081.5038 1080.4965 1080.4804 14.9 400 - 408 1 --- R.QSANMKSCR.E  
1655.7423 1654.7350 1654.7733 -23.15 2 - 17 0 --- M.EAMSPQQDALGAQPGR.S  
1732.8452 1731.8380 1731.9156 -44.81 780 - 795 1 --- K.KSLSGHEGTQVTLFTK.S  
1987.0118 1986.0045 1985.9946 5.01 703 - 719 1 --- R.SSEPSIDYLDTKLSYLR.E  
**No match to:** 962.4472, 988.4860, 1002.5491, 1780.8137, 1794.8568, 1833.8947, 1912.8891, 1998.9932, 2353.0895

#### Search Parameters

**Type of search** : MS/MS Ion Search  
**Enzyme** : Trypsin  
**Fixed modifications** : Carbamidomethyl (C)  
**Variable modifications** : Oxidation (M)  
**Mass values** : Monoisotopic  
**Protein Mass** : Unrestricted  
**Peptide Mass Tolerance** :  $\pm 50$  ppm  
**Fragment Mass Tolerance** :  $\pm 0.6$  Da  
**Max Missed Cleavages** : 1  
**Instrument type** : MALDI-TOF-TOF  
**Query1 (910.4295,1+)** : <no title>  
**Query2 (962.4472,1+)** : <no title>  
**Query3 (988.4860,1+)** : <no title>  
**Query4 (1002.5491,1+)** : <no title>  
**Query5 (1081.5038,1+)** : <no title>  
**Query6 (1655.7423,1+)** : <no title>  
**Query7 (1732.8452,1+)** : <no title>  
**Query8 (1780.8137,1+)** : <no title>  
**Query9 (1794.8568,1+)** : <no title>  
**Query10 (1833.8947,1+)** : <no title>  
**Query11 (1912.8891,1+)** : <no title>  
**Query12 (1987.0118,1+)** : <no title>  
**Query13 (1998.9932,1+)** : <no title>  
**Query14 (2353.0895,1+)** : <no title>

**Mascot:** <http://www.matrixscience.com/>

# **MASCOT** Mascot Search Results **SCIENCE**

User :  
Email :  
Search title : Auto submitted by BioTools  
Database : SwissProt 57.15 (515203 sequences; 181334896 residues)  
Taxonomy : Mus. (16281 sequences)  
Timestamp : 22 Nov 2013 at 05:06:36 GMT  
Warning : A Peptide summary report will usually give a much clearer picture of MS/MS search results.  
Top Score : 195 for ALBU\_MOUSE, Serum albumin OS=Mus musculus GN=Alb PE=1 SV=3

## Mascot Score Histogram

Protein score is  $-10 \cdot \log(P)$ , where P is the probability that the observed match is a random event.

Protein scores greater than 55 are significant ( $p < 0.05$ ).

Protein scores are derived from ions scores as a non-probabilistic basis for ranking protein hits.

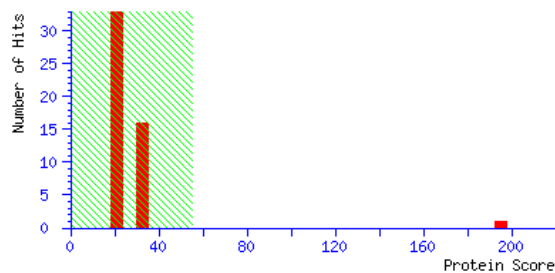

## Protein Summary Report

### Index

| Accession                       | Mass   | Score | Description                                                                 |
|---------------------------------|--------|-------|-----------------------------------------------------------------------------|
| 1. <a href="#">ALBU_MOUSE</a>   | 70700  | 195   | Serum albumin OS=Mus musculus GN=Alb PE=1 SV=3                              |
| 2. <a href="#">ZN672_MOUSE</a>  | 54002  | 34    | Zinc finger protein 672 OS=Mus musculus GN=Znf672 PE=2 SV=1                 |
| 3. <a href="#">TTLL3_MOUSE</a>  | 105388 | 32    | Tubulin monoglycylase TTLL3 OS=Mus musculus GN=Ttl3 PE=1 SV=1               |
| 4. <a href="#">MAP9_MOUSE</a>   | 73580  | 31    | Microtubule-associated protein 9 OS=Mus musculus GN=Map9 PE=2 SV=2          |
| 5. <a href="#">TBCD4_MOUSE</a>  | 148954 | 31    | TBC1 domain family member 4 OS=Mus musculus GN=Tbc1d4 PE=1 SV=2             |
| 6. <a href="#">TRI27_MOUSE</a>  | 59786  | 30    | Zinc finger protein RFP OS=Mus musculus GN=Trim27 PE=1 SV=2                 |
| 7. <a href="#">CALCA_MOUSE</a>  | 14227  | 30    | Calcitonin gene-related peptide 1 OS=Mus musculus GN=Calca PE=2 SV=1        |
| 8. <a href="#">KGPI_MOUSE</a>   | 76929  | 30    | cGMP-dependent protein kinase 1 OS=Mus musculus GN=Prkg1 PE=1 SV=1          |
| 9. <a href="#">CQ067_MOUSE</a>  | 10728  | 29    | Uncharacterized protein C17orf67 homolog OS=Mus musculus GN=Gm525 PE=2 SV=1 |
| 10. <a href="#">CIDE3_MOUSE</a> | 27502  | 29    | Cell death activator CIDE-3 OS=Mus musculus GN=Cidec PE=2 SV=1              |

### Results List

1. [ALBU\\_MOUSE](#) Mass: 70700 Score: 195 Expect: 5.1e-016 Matches: 7

Serum albumin OS=Mus musculus GN=Alb PE=1 SV=3

| Observed  | Mr(expt)  | Mr(calc)  | ppm  | Start | End   | Miss | Ions | Peptide                |
|-----------|-----------|-----------|------|-------|-------|------|------|------------------------|
| 1067.5103 | 1066.5030 | 1066.4536 | 46.4 | 500   | - 508 | 0    | ---  | K.CCSGSLVER.R          |
| 1439.7960 | 1438.7887 | 1438.7780 | 7.45 | 439   | - 452 | 0    | 42   | K.APQVSTPTLVEAAR.N     |
| 1455.8118 | 1454.8045 | 1454.7994 | 3.52 | 361   | - 372 | 1    | 21   | R.RHPDYSVSLLLR.L       |
| 1479.8037 | 1478.7964 | 1478.7881 | 5.58 | 422   | - 434 | 0    | 23   | K.LGEYGFQNAILVR.Y      |
| 1609.8013 | 1608.7941 | 1608.7824 | 7.25 | 348   | - 360 | 0    | 31   | K.DVFLGTFLYEYSR.R      |
| 1882.9407 | 1881.9334 | 1881.9295 | 2.08 | 509   | - 524 | 0    | ---  | R.RPCFSALTVDETYVPK.E   |
| 1981.9331 | 1980.9258 | 1980.9211 | 2.37 | 585   | - 602 | 1    | ---  | K.AADKDTCFSTEGPNLVTR.C |

**No match to:** 856.5451, 879.4699, 1032.5657, 1523.7787, 1703.8452, 2603.1735

2. ZNF672\_MOUSE Mass: 54002 Score: 34 Expect: 6.8 Matches: 3

Zinc finger protein 672 OS=Mus musculus GN=Znf672 PE=2 SV=1

| Observed  | Mr(expt)  | Mr(calc)  | ppm    | Start | End   | Miss | Ions | Peptide             |
|-----------|-----------|-----------|--------|-------|-------|------|------|---------------------|
| 1439.7960 | 1438.7887 | 1438.7178 | 49.3   | 175   | - 187 | 1    | 0    | R.AFHSSAGLRNHSR.I   |
| 1455.8118 | 1454.8045 | 1454.8623 | -39.70 | 108   | - 119 | 1    | 6    | R.RFPHPVALLHR.A     |
| 1882.9407 | 1881.9334 | 1881.9203 | 6.99   | 122   | - 136 | 1    | ---  | R.QHPPEKPHRCPLCAR.S |

**No match to:** 856.5451, 879.4699, 1032.5657, 1067.5103, 1479.8037, 1523.7787, 1609.8013, 1703.8452, 1981.9331, 2603.1735

3. TTL3\_MOUSE Mass: 105388 Score: 32 Expect: 9.6 Matches: 3

Tubulin monoglycylase TTL3 OS=Mus musculus GN=Ttl3 PE=1 SV=1

| Observed  | Mr(expt)  | Mr(calc)  | ppm   | Start | End   | Miss | Ions | Peptide                                |
|-----------|-----------|-----------|-------|-------|-------|------|------|----------------------------------------|
| 1439.7960 | 1438.7887 | 1438.7245 | 44.6  | 332   | - 343 | 0    | 8    | K.AFIEDFWLTAAR.N                       |
| 1455.8118 | 1454.8045 | 1454.7882 | 11.2  | 711   | - 723 | 0    | 5    | K.QPAVEVPQYVGIR.L                      |
| 1981.9331 | 1980.9258 | 1980.9392 | -6.78 | 492   | - 507 | 1    | ---  | R.LDEMLKLVDCNPMLMK.D + 2 Oxidation (M) |

**No match to:** 856.5451, 879.4699, 1032.5657, 1067.5103, 1479.8037, 1523.7787, 1609.8013, 1703.8452, 1882.9407, 2603.1735

4. MAP9\_MOUSE Mass: 73580 Score: 31 Expect: 13 Matches: 5

Microtubule-associated protein 9 OS=Mus musculus GN=Map9 PE=2 SV=2

| Observed  | Mr(expt)  | Mr(calc)  | ppm  | Start | End   | Miss | Ions | Peptide                         |
|-----------|-----------|-----------|------|-------|-------|------|------|---------------------------------|
| 1032.5657 | 1031.5584 | 1031.5135 | 43.6 | 544   | - 552 | 1    | ---  | K.EEEAVAEKK.K                   |
| 1439.7960 | 1438.7887 | 1438.7503 | 26.7 | 436   | - 446 | 1    | ---  | K.NVYLHEMHRIR.R                 |
| 1455.8118 | 1454.8045 | 1454.7452 | 40.7 | 436   | - 446 | 1    | ---  | K.NVYLHEMHRIR.R + Oxidation (M) |
| 1523.7787 | 1522.7715 | 1522.7667 | 3.12 | 597   | - 608 | 1    | ---  | K.QAISEYEWLEK.K                 |
| 1703.8452 | 1702.8379 | 1702.7646 | 43.1 | 304   | - 318 | 1    | ---  | K.DGQVAADDLEEREK.G              |

**No match to:** 856.5451, 879.4699, 1067.5103, 1479.8037, 1609.8013, 1882.9407, 1981.9331, 2603.1735

5. TBCD4\_MOUSE Mass: 148954 Score: 31 Expect: 14 Matches: 5

TBC1 domain family member 4 OS=Mus musculus GN=Tbc1d4 PE=1 SV=2

| Observed  | Mr(expt)  | Mr(calc)  | ppm    | Start | End    | Miss | Ions | Peptide                          |
|-----------|-----------|-----------|--------|-------|--------|------|------|----------------------------------|
| 1032.5657 | 1031.5584 | 1031.5182 | 39.0   | 527   | - 534  | 1    | ---  | R.QLCEAKQR.T                     |
| 1439.7960 | 1438.7887 | 1438.7378 | 35.4   | 1168  | - 1179 | 0    | ---  | K.IITQVFEMDISK.Q + Oxidation (M) |
| 1523.7787 | 1522.7715 | 1522.7932 | -14.30 | 934   | - 945  | 0    | ---  | R.GEIQFLALQYR.L                  |

1703.8452 1702.8379 1702.8786 -23.90 50 - 63 0 --- R.TTLPMLPWLMAEIR.R + 2 Oxidation (M)

1981.9331 1980.9258 1981.0098 -42.38 129 - 144 0 --- R.FIHNSHDLTYFAYLIK.A

**No match to:** 856.5451, 879.4699, 1067.5103, 1455.8118, 1479.8037, 1609.8013, 1882.9407, 2603.1735

**6. TRI27\_MOUSE Mass: 59786 Score: 30 Expect: 15 Matches: 3**

Zinc finger protein RFP OS=Mus musculus GN=Trim27 PE=1 SV=2

**Observed Mr(expt) Mr(calc) ppm Start End Miss Ions Peptide**

856.5451 855.5378 855.4967 48.1 277 - 283 0 --- K.IHFAQK.C

1523.7787 1522.7715 1522.7119 39.1 298 - 309 1 --- K.MQSDMEKIQELR.E + Oxidation (M)

1609.8013 1608.7941 1608.7389 34.3 383 - 395 1 5 K.WTIGVCEDSVCRK.G

**No match to:** 879.4699, 1032.5657, 1067.5103, 1439.7960, 1455.8118, 1479.8037, 1703.8452, 1882.9407, 1981.9331, 2603.1735

**7. CALCA\_MOUSE Mass: 14227 Score: 30 Expect: 16 Matches: 2**

Calcitonin gene-related peptide 1 OS=Mus musculus GN=Calca PE=2 SV=1

**Observed Mr(expt) Mr(calc) ppm Start End Miss Ions Peptide**

1523.7787 1522.7715 1522.7887 -11.34 48 - 60 0 --- R.LLAALVQDYMOMK.A

1609.8013 1608.7941 1608.7533 25.4 107 - 121 0 5 K.DNFVPTNVGSEAFGR.R

**No match to:** 856.5451, 879.4699, 1032.5657, 1067.5103, 1439.7960, 1455.8118, 1479.8037, 1703.8452, 1882.9407, 1981.9331, 2603.1735

**8. KGP1\_MOUSE Mass: 76929 Score: 30 Expect: 17 Matches: 3**

cGMP-dependent protein kinase 1 OS=Mus musculus GN=Prkg1 PE=1 SV=1

**Observed Mr(expt) Mr(calc) ppm Start End Miss Ions Peptide**

1067.5103 1066.5030 1066.4818 19.8 2 - 10 0 --- M.SELEEDFAK.I

1439.7960 1438.7887 1438.7569 22.1 251 - 263 1 9 R.QGARGDTFFIISK.G

2603.1735 2602.1662 2602.2746 -41.64 433 - 453 1 --- K.YLYMLMEACLGELWTLRDR.G

**No match to:** 856.5451, 879.4699, 1032.5657, 1455.8118, 1479.8037, 1523.7787, 1609.8013, 1703.8452, 1882.9407, 1981.9331

**9. CQ067\_MOUSE Mass: 10728 Score: 29 Expect: 20 Matches: 2**

Uncharacterized protein C17orf67 homolog OS=Mus musculus GN=Gm525 PE=2 SV=1

**Observed Mr(expt) Mr(calc) ppm Start End Miss Ions Peptide**

856.5451 855.5378 855.5290 10.3 28 - 34 1 --- K.QAKQLLR.S

2603.1735 2602.1662 2602.1594 2.62 65 - 84 0 --- R.AEEQFLEHWLNPHCKPHCDR.N

**No match to:** 879.4699, 1032.5657, 1067.5103, 1439.7960, 1455.8118, 1479.8037, 1523.7787, 1609.8013, 1703.8452, 1882.9407, 1981.9331

**10. CIDEC\_MOUSE Mass: 27502 Score: 29 Expect: 21 Matches: 3**

Cell death activator CIDE-3 OS=Mus musculus GN=Cidec PE=2 SV=1

**Observed Mr(expt) Mr(calc) ppm Start End Miss Ions Peptide**

856.5451 855.5378 855.5542 -19.15 184 - 190 1 --- R.IVKEIVR.W

1439.7960 1438.7887 1438.7820 4.65 139 - 150 1 --- K.IDVARVTFDLYK.L

1703.8452 1702.8379 1702.8422 -2.52 1 - 14 1 --- -.MDYAMKSLSLLYPR.S + Oxidation (M)

**No match to:** 879.4699, 1032.5657, 1067.5103, 1455.8118, 1479.8037, 1523.7787, 1609.8013, 1882.9407, 1981.9331, 2603.1735

**Search Parameters**

Type of search : MS/MS Ion Search  
Enzyme : Trypsin  
Fixed modifications : Carbamidomethyl (C)  
Variable modifications : Oxidation (M)  
Mass values : Monoisotopic  
Protein Mass : Unrestricted  
Peptide Mass Tolerance :  $\pm 50$  ppm  
Fragment Mass Tolerance:  $\pm 0.6$  Da  
Max Missed Cleavages : 1  
Instrument type : MALDI-TOF-TOF  
Query1 (856.5451,1+) : <no title>  
Query2 (879.4699,1+) : <no title>  
Query3 (1032.5657,1+) : <no title>  
Query4 (1067.5103,1+) : <no title>  
Query5 (1439.7960,1+) : <no title>  
Query6 (1455.8118,1+) : <no title>  
Query7 (1479.8037,1+) : <no title>  
Query8 (1523.7787,1+) : <no title>  
Query9 (1609.8013,1+) : <no title>  
Query10 (1703.8452,1+) : <no title>  
Query11 (1882.9407,1+) : <no title>  
Query12 (1981.9331,1+) : <no title>  
Query13 (2603.1735,1+) : <no title>

**Mascot:** <http://www.matrixscience.com/>



# **MASCOT** Mascot Search Results **SCIENCE**

User :  
 Email :  
 Search title : Auto submitted by BioTools  
 Database : SwissProt 57.15 (515203 sequences; 181334896 residues)  
 Taxonomy : Mus musculus (house mouse) (16230 sequences)  
 Timestamp : 5 Nov 2013 at 04:47:14 GMT  
 Warning : A Peptide summary report will usually give a much clearer picture of MS/MS search results.  
 Top Score : 179 for HS90B\_MOUSE, Heat shock protein HSP 90-beta OS=Mus musculus GN=Hsp90ab1 PE=1 SV=2

## Mascot Score Histogram

Protein score is  $-10 \cdot \log(P)$ , where P is the probability that the observed match is a random event.

Protein scores greater than 55 are significant ( $p < 0.05$ ).

Protein scores are derived from ions scores as a non-probabilistic basis for ranking protein hits.

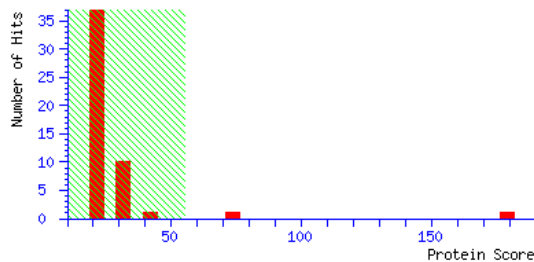

## Protein Summary Report Index

| Accession                       | Mass  | Score | Description                                                                          |
|---------------------------------|-------|-------|--------------------------------------------------------------------------------------|
| 1. <a href="#">HS90B_MOUSE</a>  | 83615 | 179   | Heat shock protein HSP 90-beta OS=Mus musculus GN=Hsp90ab1 PE=1 SV=2                 |
| 2. <a href="#">HS90A_MOUSE</a>  | 85134 | 79    | Heat shock protein HSP 90-alpha OS=Mus musculus GN=Hsp90aa1 PE=1 SV=4                |
| 3. <a href="#">FGF22_MOUSE</a>  | 18972 | 42    | Fibroblast growth factor 22 OS=Mus musculus GN=Fgf22 PE=2 SV=1                       |
| 4. <a href="#">TPD53_MOUSE</a>  | 22558 | 35    | Tumor protein D53 OS=Mus musculus GN=Tpd52l1 PE=2 SV=1                               |
| 5. <a href="#">EHD1_MOUSE</a>   | 60622 | 33    | EH domain-containing protein 1 OS=Mus musculus GN=Ehd1 PE=1 SV=1                     |
| 6. <a href="#">EHD3_MOUSE</a>   | 60840 | 33    | EH domain-containing protein 3 OS=Mus musculus GN=Ehd3 PE=1 SV=2                     |
| 7. <a href="#">CNTRB_MOUSE</a>  | 99515 | 32    | Centrobilin OS=Mus musculus GN=Cntrob PE=2 SV=2                                      |
| 8. <a href="#">NAL10_MOUSE</a>  | 77288 | 29    | NACHT, LRR and PYD domains-containing protein 10 OS=Mus musculus GN=Nlrp10 PE=1 SV=1 |
| 9. <a href="#">LMLN_MOUSE</a>   | 78350 | 29    | Leishmanolysin-like peptidase OS=Mus musculus GN=Lmln PE=2 SV=1                      |
| 10. <a href="#">1433B_MOUSE</a> | 28183 | 28    | 14-3-3 protein beta/alpha OS=Mus musculus GN=Ywhab PE=1 SV=3                         |

## Results List

- [HS90B\\_MOUSE](#) Mass: 83615 Score: 179 Expect: 2e-014 Matches: 12  
 Heat shock protein HSP 90-beta OS=Mus musculus GN=Hsp90ab1 PE=1 SV=2  
 Observed Mr(expt) Mr(calc) ppm Start End Miss Ions Peptide

901.4876 900.4803 900.5181 -42.00 285 - 291 0 --- K.TKPIWTR.N  
951.4228 950.4155 950.4570 -43.60 169 - 177 0 --- R.ADHGPIGR.G  
1194.5982 1193.5909 1193.6404 -41.47 73 - 82 0 39 K.IDILPNPQER.T  
1208.6127 1207.6055 1207.6237 -15.11 339 - 348 1 --- R.APFDFLFFENK.K  
1236.5903 1235.5830 1235.6299 -37.88 338 - 347 1 11 R.RAPFDLFENK.K  
1311.5509 1310.5437 1310.5626 -14.45 187 - 196 0 --- K.EDQTEYLEER.R  
1348.6237 1347.6165 1347.6572 -30.18 320 - 330 0 40 K.HFSVEGQLEFR.A  
1376.6449 1375.6377 1375.5934 32.2 613 - 624 1 --- R.DNSTMGYMAKK.H  
1544.7883 1543.7811 1543.8205 -25.57 42 - 55 1 --- R.ELISNASDALDKIR.Y  
1564.8235 1563.8162 1563.8620 -29.28 70 - 82 1 --- K.ELKIDILPNPQER.T  
2015.0267 2014.0194 2014.0371 -8.78 181 - 196 1 --- K.VILHLKEDQTEYLEER.R  
2255.9581 2254.9508 2254.9516 -0.32 149 - 168 0 --- K.HNDDEQYAWESSAGGSFTVR.A

**No match to:** 829.4898, 856.4776, 933.4688, 993.4153, 1325.5927, 1360.6220, 1364.6877, 1406.6520, 1526.7419, 1549.6964, 1557.7993, 1561.7675, 1587.7966, 1673.8614, 1869.7689, 2171.0948, 2267.9857

2. HS90A\_MOUSE **Mass:** 85134 **Score:** 79 **Expect:** 0.00021 **Matches:** 8

Heat shock protein HSP 90-alpha OS=Mus musculus GN=Hsp90aa1 PE=1 SV=4

| Observed  | Mr(expt)  | Mr(calc)  | ppm    | Start | End | Miss | Ions | Peptide                  |
|-----------|-----------|-----------|--------|-------|-----|------|------|--------------------------|
| 901.4876  | 900.4803  | 900.5181  | -42.00 | 294   | 300 | 0    | ---  | K.TKPIWTR.N              |
| 1208.6127 | 1207.6055 | 1207.6237 | -15.12 | 491   | 500 | 0    | ---  | K.HIYFITGETK.D           |
| 1236.5903 | 1235.5830 | 1235.6299 | -37.88 | 348   | 357 | 1    | ---  | R.APFDFLFFENRK.K         |
| 1311.5509 | 1310.5437 | 1310.5626 | -14.45 | 192   | 201 | 0    | ---  | K.EDQTEYLEER.R           |
| 1348.6237 | 1347.6165 | 1347.6572 | -30.18 | 329   | 339 | 0    | 40   | K.HFSVEGQLEFR.A          |
| 1544.7883 | 1543.7811 | 1543.7253 | 36.1   | 548   | 560 | 1    | ---  | K.EGLELPEDEEEKK.K        |
| 2015.0267 | 2014.0194 | 2014.0371 | -8.78  | 186   | 201 | 1    | ---  | K.VILHLKEDQTEYLEER.R     |
| 2255.9581 | 2254.9508 | 2254.9516 | -0.32  | 154   | 173 | 0    | ---  | K.HNDDEQYAWESSAGGSFTVR.T |

**No match to:** 829.4898, 856.4776, 933.4688, 951.4228, 993.4153, 1194.5982, 1325.5927, 1360.6220, 1364.6877, 1376.6449, 1406.6520, 1526.7419, 1549.6964, 1557.7993, 1561.7675, 1564.8235, 1587.7966, 1673.8614, 1869.7689, 2171.0948, 2267.9857

3. FGF22\_MOUSE **Mass:** 18972 **Score:** 42 **Expect:** 1.1 **Matches:** 4

Fibroblast growth factor 22 OS=Mus musculus GN=Fgf22 PE=2 SV=1

| Observed  | Mr(expt)  | Mr(calc)  | ppm    | Start | End | Miss | Ions | Peptide                                |
|-----------|-----------|-----------|--------|-------|-----|------|------|----------------------------------------|
| 1549.6964 | 1548.6892 | 1548.7507 | -39.74 | 79    | 91  | 1    | ---  | K.AVYSGFYVAMNRR.G + Oxidation (M)      |
| 1564.8235 | 1563.8162 | 1563.8409 | -15.81 | 149   | 162 | 0    | ---  | R.HQLSTHFLPVLVSS.-                     |
| 1673.8614 | 1672.8541 | 1672.8719 | -10.65 | 127   | 141 | 0    | ---  | R.GRPMFLALDSQGIPR.Q + Oxidation (M)    |
| 2015.0267 | 2014.0194 | 2014.0531 | -16.71 | 127   | 144 | 1    | ---  | R.GRPMFLALDSQGIPRQGR.R + Oxidation (M) |

**No match to:** 829.4898, 856.4776, 901.4876, 933.4688, 951.4228, 993.4153, 1194.5982, 1208.6127, 1236.5903, 1311.5509, 1325.5927, 1348.6237, 1360.6220, 1364.6877, 1376.6449, 1406.6520, 1526.7419, 1544.7883, 1557.7993, 1561.7675, 1587.7966, 1869.7689, 2171.0948, 2255.9581, 2267.9857

4. TPD53\_MOUSE **Mass:** 22558 **Score:** 35 **Expect:** 5.5 **Matches:** 4

Tumor protein D53 OS=Mus musculus GN=Tpd52l1 PE=2 SV=1

| Observed | Mr(expt) | Mr(calc) | ppm | Start | End | Miss | Ions | Peptide |
|----------|----------|----------|-----|-------|-----|------|------|---------|
|----------|----------|----------|-----|-------|-----|------|------|---------|

1194.5982 1193.5909 1193.5784 10.5 71 - 80 0 --- K.LGMNLMNELK.Q + 2 Oxidation (M)  
 1208.6127 1207.6055 1207.5945 9.04 99 - 109 0 --- K.THETLSHAGQK.A  
 1364.6877 1363.6804 1363.7096 -21.37 110 - 123 0 --- K.ATAAFNNVGTASK.K  
 1564.8235 1563.8162 1563.7650 32.8 130 - 142 1 --- R.YSIRHSISMPAMR.N + Oxidation (M)

**No match to:** 829.4898, 856.4776, 901.4876, 933.4688, 951.4228, 993.4153, 1236.5903, 1311.5509, 1325.5927, 1348.6237, 1360.6220,  
 1376.6449, 1406.6520, 1526.7419, 1544.7883, 1549.6964, 1557.7993, 1561.7675, 1587.7966, 1673.8614, 1869.7689, 2015.0267, 2171.0948,  
 2255.9581, 2267.9857

5. EHD1\_MOUSE Mass: 60622 Score: 33 Expect: 7.6 Matches: 4

EH domain-containing protein 1 OS=Mus musculus GN=Ehd1 PE=1 SV=1

**Observed Mr(expt) Mr(calc) ppm Start End Miss Ions Peptide**

1236.5903 1235.5830 1235.6411 -46.97 125 - 135 0 --- K.LNAFGNAFLNR.F  
 1348.6237 1347.6165 1347.6452 -21.35 221 - 231 0 12 K.ADQIETQLMR.V + Oxidation (M)  
 1364.6877 1363.6804 1363.7360 -40.78 124 - 135 1 --- R.KLNAFGNAFLNR.F  
 1673.8614 1672.8541 1672.7885 39.2 168 - 181 0 --- R.GYDFAAVLEWFAER.V

**No match to:** 829.4898, 856.4776, 901.4876, 933.4688, 951.4228, 993.4153, 1194.5982, 1208.6127, 1311.5509, 1325.5927, 1360.6220,  
 1376.6449, 1406.6520, 1526.7419, 1544.7883, 1549.6964, 1557.7993, 1561.7675, 1564.8235, 1587.7966, 1869.7689, 2015.0267, 2171.0948,  
 2255.9581, 2267.9857

6. EHD3\_MOUSE Mass: 60840 Score: 33 Expect: 8.1 Matches: 4

EH domain-containing protein 3 OS=Mus musculus GN=Ehd3 PE=1 SV=2

**Observed Mr(expt) Mr(calc) ppm Start End Miss Ions Peptide**

1236.5903 1235.5830 1235.6411 -46.97 125 - 135 0 --- K.LNAFGNAFLNR.F  
 1348.6237 1347.6165 1347.6452 -21.35 221 - 231 0 12 K.ADQIETQLMR.V + Oxidation (M)  
 1364.6877 1363.6804 1363.7360 -40.78 124 - 135 1 --- R.KLNAFGNAFLNR.F  
 1673.8614 1672.8541 1672.7885 39.2 168 - 181 0 --- R.GYDFAAVLEWFAER.V

**No match to:** 829.4898, 856.4776, 901.4876, 933.4688, 951.4228, 993.4153, 1194.5982, 1208.6127, 1311.5509, 1325.5927, 1360.6220,  
 1376.6449, 1406.6520, 1526.7419, 1544.7883, 1549.6964, 1557.7993, 1561.7675, 1564.8235, 1587.7966, 1869.7689, 2015.0267, 2171.0948,  
 2255.9581, 2267.9857

7. CNTRB\_MOUSE Mass: 99515 Score: 32 Expect: 11 Matches: 6

Centrobins OS=Mus musculus GN=Cntrob PE=2 SV=2

**Observed Mr(expt) Mr(calc) ppm Start End Miss Ions Peptide**

829.4898 828.4825 828.4817 0.92 864 - 870 1 --- K.TEKPARK.K  
 1544.7883 1543.7811 1543.7590 14.3 529 - 541 1 --- R.DLKSGNQLEEQR.A  
 1557.7993 1556.7920 1556.8158 -15.28 302 - 314 1 --- K.EALEEERQALTLR.L  
 1561.7675 1560.7602 1560.8181 -37.12 224 - 236 1 --- K.DLMIEQLDKTLAR.V + Oxidation (M)  
 1564.8235 1563.8162 1563.7688 30.3 194 - 205 1 --- K.HCERHIQSLQTR.V  
 1673.8614 1672.8541 1672.8454 5.20 440 - 453 0 --- R.IQMESELAVQLEQR.V

**No match to:** 856.4776, 901.4876, 933.4688, 951.4228, 993.4153, 1194.5982, 1208.6127, 1236.5903, 1311.5509, 1325.5927, 1348.6237,  
 1360.6220, 1364.6877, 1376.6449, 1406.6520, 1526.7419, 1549.6964, 1587.7966, 1869.7689, 2015.0267, 2171.0948, 2255.9581, 2267.9857

8. NAL10\_MOUSE Mass: 77288 Score: 29 Expect: 19 Matches: 6

NACHT, LRR and PYD domains-containing protein 10 OS=Mus musculus GN=Nlrp10 PE=1 SV=1

| Observed  | Mr(expt)  | Mr(calc)  | ppm    | Start | End | Miss | Ions | Peptide                               |
|-----------|-----------|-----------|--------|-------|-----|------|------|---------------------------------------|
| 951.4228  | 950.4155  | 950.4379  | -23.50 | 663   | -   | 670  | 1    | --- K.KDGEMIDK.M + Oxidation (M)      |
| 993.4153  | 992.4080  | 992.3692  | 39.2   | 638   | -   | 645  | 0    | --- K.GHMEMNDK.E + 2 Oxidation (M)    |
| 1194.5982 | 1193.5909 | 1193.5533 | 31.6   | 397   | -   | 407  | 0    | --- K.SLCSLAAEGMR.H                   |
| 1208.6127 | 1207.6055 | 1207.6231 | -14.58 | 120   | -   | 131  | 0    | --- K.LLLMATSSSGGR.R + Oxidation (M)  |
| 1364.6877 | 1363.6804 | 1363.7242 | -32.08 | 120   | -   | 132  | 1    | --- K.LLLMATSSSGGRR.S + Oxidation (M) |
| 1587.7966 | 1586.7893 | 1586.8021 | -8.03  | 253   | -   | 265  | 1    | --- K.SSRAECVLHILMR.R + Oxidation (M) |

**No match to:** 829.4898, 856.4776, 901.4876, 933.4688, 1236.5903, 1311.5509, 1325.5927, 1348.6237, 1360.6220, 1376.6449, 1406.6520, 1526.7419, 1544.7883, 1549.6964, 1557.7993, 1561.7675, 1564.8235, 1673.8614, 1869.7689, 2015.0267, 2171.0948, 2255.9581, 2267.9857

9. LMLN\_MOUSE Mass: 78350 Score: 29 Expect: 21 Matches: 5

Leishmanolysin-like peptidase OS=Mus musculus GN=Lmln PE=2 SV=1

| Observed  | Mr(expt)  | Mr(calc)  | ppm    | Start | End | Miss | Ions | Peptide                 |
|-----------|-----------|-----------|--------|-------|-----|------|------|-------------------------|
| 1236.5903 | 1235.5830 | 1235.6007 | -14.30 | 2     | -   | 17   | 0    | --- M.AAAGSGGAGGPGGPR.G |
| 1325.5927 | 1324.5854 | 1324.5540 | 23.7   | 150   | -   | 160  | 0    | --- R.YCTGECVHTK.C      |
| 1376.6449 | 1375.6377 | 1375.6455 | -5.73  | 426   | -   | 435  | 1    | --- K.SCKFWIDQHR.Q      |
| 1557.7993 | 1556.7920 | 1556.7841 | 5.04   | 459   | -   | 471  | 1    | --- R.QDQRAVAVCNLQR.F   |
| 1564.8235 | 1563.8162 | 1563.7616 | 34.9   | 412   | -   | 424  | 1    | --- K.LDWGRGLGCEFVR.K   |

**No match to:** 829.4898, 856.4776, 901.4876, 933.4688, 951.4228, 993.4153, 1194.5982, 1208.6127, 1311.5509, 1348.6237, 1360.6220, 1364.6877, 1406.6520, 1526.7419, 1544.7883, 1549.6964, 1561.7675, 1587.7966, 1673.8614, 1869.7689, 2015.0267, 2171.0948, 2255.9581, 2267.9857

10. 1433B\_MOUSE Mass: 28183 Score: 28 Expect: 28 Matches: 3

14-3-3 protein beta/alpha OS=Mus musculus GN=Ywhab PE=1 SV=3

| Observed  | Mr(expt)  | Mr(calc)  | ppm    | Start | End | Miss | Ions | Peptide                             |
|-----------|-----------|-----------|--------|-------|-----|------|------|-------------------------------------|
| 1194.5982 | 1193.5909 | 1193.5962 | -4.41  | 2     | -   | 11   | 1    | --- M.TMDKSELVQK.A + Oxidation (M)  |
| 1236.5903 | 1235.5830 | 1235.6445 | -49.70 | 160   | -   | 169  | 1    | 10 K.KEMQPTHPIR.L                   |
| 1325.5927 | 1324.5854 | 1324.6367 | -38.70 | 1     | -   | 11   | 1    | --- -.MTMDKSELVQK.A + Oxidation (M) |

**No match to:** 829.4898, 856.4776, 901.4876, 933.4688, 951.4228, 993.4153, 1208.6127, 1311.5509, 1348.6237, 1360.6220, 1364.6877, 1376.6449, 1406.6520, 1526.7419, 1544.7883, 1549.6964, 1557.7993, 1561.7675, 1564.8235, 1587.7966, 1673.8614, 1869.7689, 2015.0267, 2171.0948, 2255.9581, 2267.9857

Search Parameters

Type of search : MS/MS Ion Search  
Enzyme : Trypsin  
Fixed modifications : Carbamidomethyl (C)  
Variable modifications : Oxidation (M)  
Mass values : Monoisotopic  
Protein Mass : Unrestricted  
Peptide Mass Tolerance :  $\pm 50$  ppm  
Fragment Mass Tolerance:  $\pm 0.6$  Da  
Max Missed Cleavages : 1

**Instrument type** : MALDI-TOF-TOF

**Query1 (829.4898,1+)** : <no title>

**Query2 (856.4776,1+)** : <no title>

**Query3 (901.4876,1+)** : <no title>

**Query4 (933.4688,1+)** : <no title>

**Query5 (951.4228,1+)** : <no title>

**Query6 (993.4153,1+)** : <no title>

**Query7 (1194.5982,1+)** : <no title>

**Query8 (1208.6127,1+)** : <no title>

**Query9 (1236.5903,1+)** : <no title>

**Query10 (1311.5509,1+)** : <no title>

**Query11 (1325.5927,1+)** : <no title>

**Query12 (1348.6237,1+)** : <no title>

**Query13 (1360.6220,1+)** : <no title>

**Query14 (1364.6877,1+)** : <no title>

**Query15 (1376.6449,1+)** : <no title>

**Query16 (1406.6520,1+)** : <no title>

**Query17 (1526.7419,1+)** : <no title>

**Query18 (1544.7883,1+)** : <no title>

**Query19 (1549.6964,1+)** : <no title>

**Query20 (1557.7993,1+)** : <no title>

**Query21 (1561.7675,1+)** : <no title>

**Query22 (1564.8235,1+)** : <no title>

**Query23 (1587.7966,1+)** : <no title>

**Query24 (1673.8614,1+)** : <no title>

**Query25 (1869.7689,1+)** : <no title>

**Query26 (2015.0267,1+)** : <no title>

**Query27 (2171.0948,1+)** : <no title>

**Query28 (2255.9581,1+)** : <no title>

**Query29 (2267.9857,1+)** : <no title>

**Mascot:** <http://www.matrixscience.com/>

# **MASCOT** Mascot Search Results **SCIENCE**

**User** :  
**Email** :  
**Search title** : Auto submitted by BioTools  
**Database** : SwissProt 57.15 (515203 sequences; 181334896 residues)  
**Taxonomy** : Mus. (16281 sequences)  
**Timestamp** : 22 Nov 2013 at 05:06:17 GMT  
**Warning** : A Peptide summary report will usually give a much clearer picture of MS/MS search results.  
**Top Score** : 181 for DESM\_MOUSE, Desmin OS=Mus musculus GN=Des PE=1 SV=3

## Mascot Score Histogram

Protein score is  $-10 \cdot \log(P)$ , where P is the probability that the observed match is a random event.

Protein scores greater than 55 are significant ( $p < 0.05$ ).

Protein scores are derived from ions scores as a non-probabilistic basis for ranking protein hits.

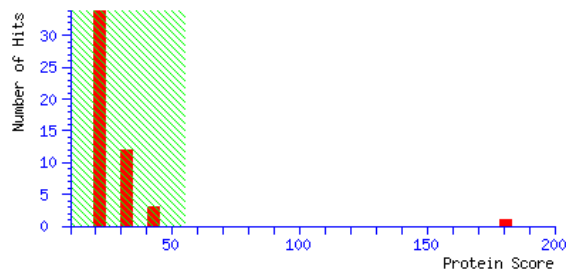

## Protein Summary Report Index

| Accession              | Mass   | Score | Description                                                                                       |
|------------------------|--------|-------|---------------------------------------------------------------------------------------------------|
| 1. <u>DESM_MOUSE</u>   | 53522  | 181   | Desmin OS=Mus musculus GN=Des PE=1 SV=3                                                           |
| 2. <u>NT5C_MOUSE</u>   | 23290  | 43    | 5'(3')-deoxyribonucleotidase, cytosolic type OS=Mus musculus GN=Nt5c PE=1 SV=1                    |
| 3. <u>COG5_MOUSE</u>   | 92113  | 39    | Conserved oligomeric Golgi complex subunit 5 OS=Mus musculus GN=Cog5 PE=2 SV=2                    |
| 4. <u>ATPB_MOUSE</u>   | 56265  | 39    | ATP synthase subunit beta, mitochondrial OS=Mus musculus GN=Atp5b PE=1 SV=2                       |
| 5. <u>APIG1_MOUSE</u>  | 92147  | 34    | AP-1 complex subunit gamma-1 OS=Mus musculus GN=Ap1g1 PE=1 SV=3                                   |
| 6. <u>NEIL1_MOUSE</u>  | 44015  | 34    | Endonuclease VIII-like 1 OS=Mus musculus GN=Neil1 PE=2 SV=3                                       |
| 7. <u>SNIP_MOUSE</u>   | 135403 | 34    | p130Cas-associated protein OS=Mus musculus GN=P140 PE=1 SV=2                                      |
| 8. <u>NDUV1_MOUSE</u>  | 51486  | 30    | NADH dehydrogenase [ubiquinone] flavoprotein 1, mitochondrial OS=Mus musculus GN=Ndufv1 PE=1 SV=1 |
| 9. <u>CQ049_MOUSE</u>  | 18042  | 30    | MLL1/MLL complex subunit C17orf49 homolog OS=Mus musculus PE=1 SV=1                               |
| 10. <u>USH1C_MOUSE</u> | 102620 | 29    | Harmonin OS=Mus musculus GN=Ush1c PE=1 SV=1                                                       |

## Results List

- DESM\_MOUSE Mass: 53522 Score: 181 Expect: 1.3e-014 Matches: 14  
 Desmin OS=Mus musculus GN=Des PE=1 SV=3

| Observed  | Mr(expt)  | Mr(calc)  | ppm   | Start | End | Miss | Ions | Peptide                          |
|-----------|-----------|-----------|-------|-------|-----|------|------|----------------------------------|
| 999.5116  | 998.5044  | 998.4967  | 7.66  | 375   | 382 | 1    | ---  | R.HLKDEMAR.H                     |
| 1039.5560 | 1038.5487 | 1038.5458 | 2.86  | 240   | 247 | 1    | ---  | K.KVHEEEIR.E                     |
| 1060.5584 | 1059.5512 | 1059.5560 | -4.56 | 406   | 414 | 1    | ---  | R.KLLEGEESR.I                    |
| 1086.5800 | 1085.5727 | 1085.5829 | -9.42 | 164   | 172 | 0    | ---  | R.QVEVLTNQR.A                    |
| 1268.5814 | 1267.5742 | 1267.5754 | -0.99 | 150   | 159 | 0    | ---  | R.VAELYEEEMR.E                   |
| 1281.6396 | 1280.6323 | 1280.6434 | -8.68 | 395   | 405 | 0    | ---  | K.MALDVEIATYR.K                  |
| 1555.7232 | 1554.7160 | 1554.7063 | 6.25  | 355   | 368 | 0    | ---  | R.FASEANGYQDNIR.L                |
| 1561.8577 | 1560.8504 | 1560.8511 | -0.43 | 227   | 239 | 1    | ---  | R.RIESLNEEIAFLK.K                |
| 1587.7867 | 1586.7795 | 1586.7900 | -6.63 | 105   | 117 | 1    | ---  | R.TNEKVELQELNDR.F                |
| 1633.8962 | 1632.8890 | 1632.8988 | -6.00 | 415   | 428 | 0    | ---  | R.INLPQTFALSALNFR.E              |
| 1673.8520 | 1672.8448 | 1672.8532 | -5.06 | 127   | 141 | 0    | 29   | R.FLEQQNAALAAEVNR.L              |
| 1699.8530 | 1698.8458 | 1698.8537 | -4.65 | 175   | 188 | 1    | ---  | R.VDVERDNLIDDLQR.L               |
| 1729.8773 | 1728.8700 | 1728.8754 | -3.13 | 299   | 314 | 1    | ---  | K.VSDLTQAANKNNDALR.Q             |
| 2755.3299 | 2754.3226 | 2754.3501 | -9.96 | 79    | 104 | 0    | ---  | R.APSYGAGELLDLDFSLADAVNQEFLATR.T |

**No match to:** 956.5613, 1011.5072, 1104.0397, 1406.6731, 1435.7531, 1601.8007, 1650.9003, 1689.9384, 1822.9070, 1988.0221, 2453.2004

2. NT5C\_MOUSE Mass: 23290 Score: 43 Expect: 0.78 Matches: 4

5'(3')-deoxyribonucleotidase, cytosolic type OS=Mus musculus GN=Nt5c PE=1 SV=1

| Observed  | Mr(expt)  | Mr(calc)  | ppm    | Start | End | Miss | Ions | Peptide                                    |
|-----------|-----------|-----------|--------|-------|-----|------|------|--------------------------------------------|
| 956.5613  | 955.5540  | 955.5749  | -21.87 | 1     | 8   | 1    | ---  | -.MAVKRPVR.V                               |
| 1561.8577 | 1560.8504 | 1560.8069 | 27.9   | 135   | 148 | 1    | ---  | R.DKTVVMGDLLIDDK.D                         |
| 1633.8962 | 1632.8890 | 1632.8372 | 31.7   | 32    | 44  | 1    | ---  | R.FPEEPHPLEQRR.G                           |
| 2453.2004 | 2452.1931 | 2452.2421 | -19.96 | 9     | 30  | 1    | ---  | R.VLVDMDGVLADFESGLLQGFRR.R + Oxidation (M) |

**No match to:** 999.5116, 1011.5072, 1039.5560, 1060.5584, 1086.5800, 1104.0397, 1268.5814, 1281.6396, 1406.6731, 1435.7531, 1555.7232, 1587.7867, 1601.8007, 1650.9003, 1673.8520, 1689.9384, 1699.8530, 1729.8773, 1822.9070, 1988.0221, 2755.3299

3. COG5\_MOUSE Mass: 92113 Score: 39 Expect: 1.9 Matches: 6

Conserved oligomeric Golgi complex subunit 5 OS=Mus musculus GN=Cog5 PE=2 SV=2

| Observed  | Mr(expt)  | Mr(calc)  | ppm    | Start | End | Miss | Ions | Peptide                   |
|-----------|-----------|-----------|--------|-------|-----|------|------|---------------------------|
| 999.5116  | 998.5044  | 998.5509  | -46.59 | 107   | 116 | 0    | ---  | R.IGALQGAVDR.M            |
| 1086.5800 | 1085.5727 | 1085.5829 | -9.39  | 206   | 214 | 1    | ---  | R.LEVENQAKR.L             |
| 1435.7531 | 1434.7458 | 1434.7579 | -8.41  | 793   | 805 | 1    | ---  | R.GALEAYVQSVRSR.D         |
| 1699.8530 | 1698.8458 | 1698.8651 | -11.37 | 329   | 342 | 0    | ---  | R.DPVSHICFIEIHK.D         |
| 1988.0221 | 1987.0148 | 1987.0374 | -11.40 | 46    | 63  | 0    | ---  | K.TYTSQSIHQAVIAEQLAK.L    |
| 2453.2004 | 2452.1931 | 2452.2898 | -39.42 | 809   | 829 | 1    | ---  | K.EFAPVYPIMVQLLQKAMYALQ.- |

**No match to:** 956.5613, 1011.5072, 1039.5560, 1060.5584, 1104.0397, 1268.5814, 1281.6396, 1406.6731, 1555.7232, 1561.8577, 1587.7867, 1601.8007, 1633.8962, 1650.9003, 1673.8520, 1689.9384, 1729.8773, 1822.9070, 2755.3299

4. ATPB\_MOUSE Mass: 56265 Score: 39 Expect: 2 Matches: 5

ATP synthase subunit beta, mitochondrial OS=Mus musculus GN=Atp5b PE=1 SV=2

| Observed  | Mr(expt)  | Mr(calc)  | ppm   | Start | End | Miss | Ions | Peptide            |
|-----------|-----------|-----------|-------|-------|-----|------|------|--------------------|
| 1406.6731 | 1405.6658 | 1405.6739 | -5.73 | 226   | 239 | 0    | ---  | K.AHGGYSVFAGVGER.T |

1435.7531 1434.7458 1434.7467 -0.59 311 - 324 0 --- R.FTQAGSEVSALLGR.I  
 1601.8007 1600.7934 1600.8031 -6.07 265 - 279 0 --- K.VALVYGMNEPPGAR.A  
 1650.9003 1649.8930 1649.9101 -10.32 95 - 109 0 --- R.LVLEVAQHLGESTVR.T  
 1988.0221 1987.0148 1987.0262 -5.74 388 - 406 0 --- R.AIAELGIYPAVDPLDSTSR.I

**No match to:** 956.5613, 999.5116, 1011.5072, 1039.5560, 1060.5584, 1086.5800, 1104.0397, 1268.5814, 1281.6396, 1555.7232, 1561.8577, 1587.7867, 1633.8962, 1673.8520, 1689.9384, 1699.8530, 1729.8773, 1822.9070, 2453.2004, 2755.3299

**5. APIG1\_MOUSE Mass: 92147 Score: 34 Expect: 6.3 Matches: 6**

AP-1 complex subunit gamma-1 OS=Mus musculus GN=Ap1g1 PE=1 SV=3

**Observed Mr(expt) Mr(calc) ppm Start End Miss Ions Peptide**

1268.5814 1267.5742 1267.6269 -41.63 335 - 345 0 --- K.TVQTDHNAVQR.H  
 1406.6731 1405.6658 1405.6772 -8.10 573 - 583 1 --- K.YDHMRSALLER.M + Oxidation (M)  
 1435.7531 1434.7458 1434.7210 17.3 578 - 589 1 --- R.SALLERMPVMEK.V + 2 Oxidation (M)  
 1561.8577 1560.8504 1560.7869 40.7 335 - 347 1 --- K.TVQTDHNAVQRHR.S  
 1633.8962 1632.8890 1632.8619 16.6 167 - 180 1 --- R.KVPELMEMFLPATK.N  
 2453.2004 2452.1931 2452.1741 7.74 53 - 72 0 --- K.LLYMHMLGYPAHFGQLECLK.L + 2 Oxidation (M)

**No match to:** 956.5613, 999.5116, 1011.5072, 1039.5560, 1060.5584, 1086.5800, 1104.0397, 1281.6396, 1555.7232, 1587.7867, 1601.8007, 1650.9003, 1673.8520, 1689.9384, 1699.8530, 1729.8773, 1822.9070, 1988.0221, 2755.3299

**6. NEIL1\_MOUSE Mass: 44015 Score: 34 Expect: 6.6 Matches: 4**

Endonuclease VIII-like 1 OS=Mus musculus GN=Neil1 PE=2 SV=3

**Observed Mr(expt) Mr(calc) ppm Start End Miss Ions Peptide**

1633.8962 1632.8890 1632.8637 15.5 96 - 109 1 --- R.HAHLRFYTAPPAPR.L  
 1673.8520 1672.8448 1672.8016 25.8 374 - 389 1 --- K.TIPDTRPREAGESSAS.-  
 1822.9070 1821.8997 1821.9084 -4.76 79 - 95 0 --- R.FGMSGFSFQLVPAEALPR.H + Oxidation (M)  
 1988.0221 1987.0148 1986.9799 17.6 35 - 52 0 --- R.NPEVPFESSAYHISALAR.G

**No match to:** 956.5613, 999.5116, 1011.5072, 1039.5560, 1060.5584, 1086.5800, 1104.0397, 1268.5814, 1281.6396, 1406.6731, 1435.7531, 1555.7232, 1561.8577, 1587.7867, 1601.8007, 1650.9003, 1689.9384, 1699.8530, 1729.8773, 2453.2004, 2755.3299

**7. SNIP\_MOUSE Mass: 135403 Score: 34 Expect: 6.9 Matches: 7**

p130Cas-associated protein OS=Mus musculus GN=P140 PE=1 SV=2

**Observed Mr(expt) Mr(calc) ppm Start End Miss Ions Peptide**

956.5613 955.5540 955.5702 -16.94 293 - 301 0 --- K.SPNTAILIK.D  
 999.5116 998.5044 998.4603 44.1 1194 - 1200 1 --- K.QRTEYMR.I + Oxidation (M)  
 1011.5072 1010.4999 1010.4967 3.13 347 - 354 1 --- R.REMVYASR.E  
 1060.5584 1059.5512 1059.5309 19.2 723 - 732 0 --- R.GLQNSASDLR.G  
 1281.6396 1280.6323 1280.5745 45.1 34 - 45 1 --- R.DPGGRGEPDPER.S  
 1822.9070 1821.8997 1821.9082 -4.65 186 - 203 1 --- R.SSRHTQGAQPGLADQAAK.L  
 1988.0221 1987.0148 1986.9581 28.5 813 - 829 1 --- R.DVAHNHRLMPGPELEEK.A + Oxidation (M)

**No match to:** 1039.5560, 1086.5800, 1104.0397, 1268.5814, 1406.6731, 1435.7531, 1555.7232, 1561.8577, 1587.7867, 1601.8007, 1633.8962, 1650.9003, 1673.8520, 1689.9384, 1699.8530, 1729.8773, 2453.2004, 2755.3299

**8. NDUV1\_MOUSE Mass: 51486 Score: 30 Expect: 15 Matches: 3**



NADH dehydrogenase [ubiquinone] flavoprotein 1, mitochondrial OS=Mus musculus GN=Ndufv1 PE=1 SV=1

**Observed Mr(expt) Mr(calc) ppm Start End Miss Ions Peptide**

1435.7531 1434.7458 1434.6748 49.5 387 - 398 1 --- R.EGVDWMNKVMAR.F  
1561.8577 1560.8504 1560.7865 41.0 138 - 152 1 --- K.LVEGCLVGGRAMGAR.A + Oxidation (M)  
1673.8520 1672.8448 1672.8468 -1.19 133 - 147 1 11 R.HDPHKLVEGCLVGGR.A

**No match to:** 956.5613, 999.5116, 1011.5072, 1039.5560, 1060.5584, 1086.5800, 1104.0397, 1268.5814, 1281.6396, 1406.6731, 1555.7232, 1587.7867, 1601.8007, 1633.8962, 1650.9003, 1689.9384, 1699.8530, 1729.8773, 1822.9070, 1988.0221, 2453.2004, 2755.3299

**9. CQ049\_MOUSE Mass: 18042 Score: 30 Expect: 16 Matches: 3**

MLL1/MLL complex subunit C17orf49 homolog OS=Mus musculus PE=1 SV=1

**Observed Mr(expt) Mr(calc) ppm Start End Miss Ions Peptide**

1601.8007 1600.7934 1600.7984 -3.13 84 - 98 0 --- K.VYEDSGIPLPAESPK.K  
1673.8520 1672.8448 1672.8355 5.53 56 - 69 1 --- K.RFGDDLNHISCVIK.E  
1729.8773 1728.8700 1728.8934 -13.51 84 - 99 1 --- K.VYEDSGIPLPAESPKK.G

**No match to:** 956.5613, 999.5116, 1011.5072, 1039.5560, 1060.5584, 1086.5800, 1104.0397, 1268.5814, 1281.6396, 1406.6731, 1435.7531, 1555.7232, 1561.8577, 1587.7867, 1633.8962, 1650.9003, 1689.9384, 1699.8530, 1822.9070, 1988.0221, 2453.2004, 2755.3299

**10. USH1C\_MOUSE Mass: 102620 Score: 29 Expect: 20 Matches: 5**

Harmonin OS=Mus musculus GN=Ush1c PE=1 SV=1

**Observed Mr(expt) Mr(calc) ppm Start End Miss Ions Peptide**

1406.6731 1405.6658 1405.7201 -38.64 779 - 792 0 --- K.VVVS AVYEGGAAER.H  
1561.8577 1560.8504 1560.8736 -14.85 90 - 103 1 --- R.LDRLHPEGLGLSVR.G  
1587.7867 1586.7795 1586.7834 -2.52 330 - 341 1 --- K.ILQEQEMERQR.R  
1699.8530 1698.8458 1698.8537 -4.67 120 - 136 0 --- K.GGQADSVGLQVGDIVR.I  
2755.3299 2754.3226 2754.4197 -35.23 32 - 55 1 --- R.MYHQTMDVAVLVGDLKLVINEPNR.L

**No match to:** 956.5613, 999.5116, 1011.5072, 1039.5560, 1060.5584, 1086.5800, 1104.0397, 1268.5814, 1281.6396, 1435.7531, 1555.7232, 1601.8007, 1633.8962, 1650.9003, 1673.8520, 1689.9384, 1729.8773, 1822.9070, 1988.0221, 2453.2004

**Search Parameters**

**Type of search** : MS/MS Ion Search

**Enzyme** : Trypsin

**Fixed modifications** : Carbamidomethyl (C)

**Variable modifications** : Oxidation (M)

**Mass values** : Monoisotopic

**Protein Mass** : Unrestricted

**Peptide Mass Tolerance** :  $\pm 50$  ppm

**Fragment Mass Tolerance**:  $\pm 0.6$  Da

**Max Missed Cleavages** : 1

**Instrument type** : MALDI-TOF-TOF

**Query1 (956.5613,1+)** : <no title>

**Query2 (999.5116,1+)** : <no title>

**Query3 (1011.5072,1+)** : <no title>

**Query4 (1039.5560,1+)** : <no title>

Query5 (1060.5584,1+) : <no title>  
Query6 (1086.5800,1+) : <no title>  
Query7 (1104.0397,1+) : <no title>  
Query8 (1268.5814,1+) : <no title>  
Query9 (1281.6396,1+) : <no title>  
Query10 (1406.6731,1+) : <no title>  
Query11 (1435.7531,1+) : <no title>  
Query12 (1555.7232,1+) : <no title>  
Query13 (1561.8577,1+) : <no title>  
Query14 (1587.7867,1+) : <no title>  
Query15 (1601.8007,1+) : <no title>  
Query16 (1633.8962,1+) : <no title>  
Query17 (1650.9003,1+) : <no title>  
Query18 (1673.8520,1+) : <no title>  
Query19 (1689.9384,1+) : <no title>  
Query20 (1699.8530,1+) : <no title>  
Query21 (1729.8773,1+) : <no title>  
Query22 (1822.9070,1+) : <no title>  
Query23 (1988.0221,1+) : <no title>  
Query24 (2453.2004,1+) : <no title>  
Query25 (2755.3299,1+) : <no title>

**Mascot:** <http://www.matrixscience.com/>

# **MASCOT** Mascot Search Results **SCIENCE**

User :  
 Email :  
 Search title : Auto submitted by BioTools  
 Database : SwissProt 57.15 (515203 sequences; 181334896 residues)  
 Taxonomy : Mus musculus (house mouse) (16230 sequences)  
 Timestamp : 5 Nov 2013 at 04:46:36 GMT  
 Warning : A Peptide summary report will usually give a much clearer picture of MS/MS search results.  
 Top Score : 103 for ATPB\_MOUSE, ATP synthase subunit beta, mitochondrial OS=Mus musculus GN=Atp5b PE=1 SV=2

## Mascot Score Histogram

Protein score is  $-10 \cdot \log(P)$ , where P is the probability that the observed match is a random event.

Protein scores greater than 55 are significant ( $p < 0.05$ ).

Protein scores are derived from ions scores as a non-probabilistic basis for ranking protein hits.

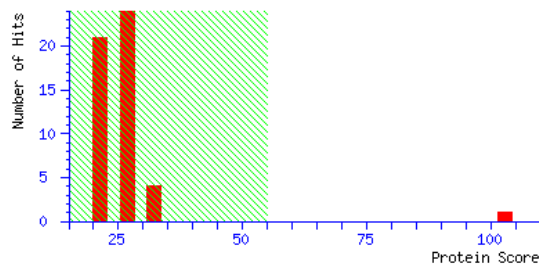

## Protein Summary Report Index

| Accession                      | Mass   | Score | Description                                                                             |
|--------------------------------|--------|-------|-----------------------------------------------------------------------------------------|
| 1. <a href="#">ATPB_MOUSE</a>  | 56265  | 103   | ATP synthase subunit beta, mitochondrial OS=Mus musculus GN=Atp5b PE=1 SV=2             |
| 2. <a href="#">CRYM_MOUSE</a>  | 33673  | 34    | Mu-crystallin homolog OS=Mus musculus GN=Crym PE=1 SV=1                                 |
| 3. <a href="#">DYH12_MOUSE</a> | 358738 | 30    | Dynein heavy chain 12, axonemal OS=Mus musculus GN=Dnah12 PE=2 SV=2                     |
| 4. <a href="#">IRK11_MOUSE</a> | 43933  | 30    | ATP-sensitive inward rectifier potassium channel 11 OS=Mus musculus GN=Kcnj11 PE=2 SV=1 |
| 5. <a href="#">AN33B_MOUSE</a> | 53797  | 30    | Ankyrin repeat domain-containing protein 33B OS=Mus musculus GN=Ankrd33b PE=2 SV=1      |
| 6. <a href="#">RRBP1_MOUSE</a> | 173232 | 29    | Ribosome-binding protein 1 OS=Mus musculus GN=Rrbp1 PE=2 SV=2                           |
| 7. <a href="#">AT2B2_MOUSE</a> | 133701 | 29    | Plasma membrane calcium-transporting ATPase 2 OS=Mus musculus GN=Atp2b2 PE=1 SV=2       |
| 8. <a href="#">TBX1_MOUSE</a>  | 51807  | 28    | T-box transcription factor TBX1 OS=Mus musculus GN=Tbx1 PE=2 SV=2                       |
| 9. <a href="#">CLPB_MOUSE</a>  | 76355  | 28    | Caseinolytic peptidase B protein homolog OS=Mus musculus GN=Clpb PE=1 SV=1              |
| 10. <a href="#">CATM_MOUSE</a> | 37898  | 27    | Cathepsin M OS=Mus musculus GN=Ctsm PE=2 SV=1                                           |

## Results List

- [ATPB\\_MOUSE](#) Mass: 56265 Score: 103 Expect: 8.1e-007 Matches: 8  
 ATP synthase subunit beta, mitochondrial OS=Mus musculus GN=Atp5b PE=1 SV=2  
 Observed Mr(expt) Mr(calc) ppm Start End Miss Ions Peptide

1038.5673 1037.5601 1037.5869 -25.90 134 - 143 0 --- K.IPVGPETLGR.I  
 1262.6369 1261.6296 1261.6336 -3.17 110 - 121 0 --- R.TIAMDGTEGLVR.G  
 1406.6653 1405.6580 1405.6739 -11.27 226 - 239 0 23 K.AHGGYSVFAGVGER.T  
 1435.7244 1434.7172 1434.7467 -20.58 311 - 324 0 --- R.FTQAGSEVSALLGR.I  
 1601.7755 1600.7682 1600.8031 -21.82 265 - 279 0 --- K.VALVYQMNPEPPGAR.A  
 1617.7612 1616.7539 1616.7981 -27.29 265 - 279 0 --- K.VALVYQMNPEPPGAR.A + Oxidation (M)  
 1650.8884 1649.8811 1649.9101 -17.53 95 - 109 0 18 R.LVLEVAQHLGESTVR.T  
 1919.0559 1918.0486 1918.0888 -20.92 125 - 143 1 --- K.VLDSGAPIKIPVGPETLGR.I

**No match to:** 856.5261, 936.5114, 997.5256, 1012.4944, 1112.5431, 1141.5575, 1148.5789, 1169.6429, 1170.6307, 1231.5890, 1244.5933, 1249.5964, 1376.7110, 1562.8891, 1718.8403, 1782.9277, 2176.9539, 2421.1422

2. CRYM\_MOUSE Mass: 33673 Score: 34 Expect: 6.6 Matches: 4

Mu-crystallin homolog OS=Mus musculus GN=Crym PE=1 SV=1

| Observed  | Mr(expt)  | Mr(calc)  | ppm   | Start | End | Miss | Ions | Peptide             |
|-----------|-----------|-----------|-------|-------|-----|------|------|---------------------|
| 1112.5431 | 1111.5359 | 1111.5444 | -7.73 | 37    | 47  | 0    | ---  | K.GPDGGVMQPVR.T     |
| 1141.5575 | 1140.5502 | 1140.5451 | 4.44  | 304   | 313 | 0    | ---  | K.LVYDSWSSGK.-      |
| 1562.8891 | 1561.8818 | 1561.8464 | 22.7  | 242   | 255 | 1    | ---  | R.QAVLYVDSREAALK.E  |
| 1650.8884 | 1649.8811 | 1649.8009 | 48.6  | 171   | 185 | 1    | ---  | R.ENAEKFASTVQGDVR.V |

**No match to:** 856.5261, 936.5114, 997.5256, 1012.4944, 1038.5673, 1148.5789, 1169.6429, 1170.6307, 1231.5890, 1244.5933, 1249.5964, 1262.6369, 1376.7110, 1406.6653, 1435.7244, 1601.7755, 1617.7612, 1718.8403, 1782.9277, 1919.0559, 2176.9539, 2421.1422

3. DYH12\_MOUSE Mass: 358738 Score: 30 Expect: 14 Matches: 8

Dynein heavy chain 12, axonemal OS=Mus musculus GN=Dnah12 PE=2 SV=2

| Observed  | Mr(expt)  | Mr(calc)  | ppm    | Start | End  | Miss | Ions | Peptide                           |
|-----------|-----------|-----------|--------|-------|------|------|------|-----------------------------------|
| 1012.4944 | 1011.4871 | 1011.4881 | -1.03  | 942   | 949  | 1    | ---  | K.DIMKFCAK.D                      |
| 1141.5575 | 1140.5502 | 1140.5961 | -40.23 | 1900  | 1908 | 1    | ---  | K.LMNHLEKEK.Y                     |
| 1244.5933 | 1243.5861 | 1243.6408 | -44.01 | 2     | 13   | 1    | ---  | M.SDPNKTAIAAEK.E                  |
| 1262.6369 | 1261.6296 | 1261.6302 | -0.48  | 1600  | 1610 | 1    | ---  | R.EFALAESPDRK.W                   |
| 1435.7244 | 1434.7172 | 1434.7394 | -15.53 | 668   | 678  | 1    | ---  | K.WELTKYPELEK.L                   |
| 1601.7755 | 1600.7682 | 1600.7766 | -5.25  | 752   | 764  | 1    | ---  | K.RSLMEEKPEEPEK.E                 |
| 1617.7612 | 1616.7539 | 1616.7715 | -10.87 | 752   | 764  | 1    | ---  | K.RSLMEEKPEEPEK.E + Oxidation (M) |
| 1650.8884 | 1649.8811 | 1649.9188 | -22.82 | 2111  | 2123 | 1    | 15   | K.HTMIRLFVHEVLR.V                 |

**No match to:** 856.5261, 936.5114, 997.5256, 1038.5673, 1112.5431, 1148.5789, 1169.6429, 1170.6307, 1231.5890, 1249.5964, 1376.7110, 1406.6653, 1562.8891, 1718.8403, 1782.9277, 1919.0559, 2176.9539, 2421.1422

4. IRK11\_MOUSE Mass: 43933 Score: 30 Expect: 17 Matches: 4

ATP-sensitive inward rectifier potassium channel 11 OS=Mus musculus GN=Kcnj11 PE=2 SV=1

| Observed  | Mr(expt)  | Mr(calc)  | ppm    | Start | End | Miss | Ions | Peptide                           |
|-----------|-----------|-----------|--------|-------|-----|------|------|-----------------------------------|
| 997.5256  | 996.5183  | 996.4876  | 30.8   | 17    | 25  | 0    | ---  | R.LAEDPAEPR.Y                     |
| 1231.5890 | 1230.5817 | 1230.6245 | -34.75 | 315   | 325 | 0    | ---  | R.FVPIVAEEDGR.Y                   |
| 1376.7110 | 1375.7037 | 1375.7347 | -22.56 | 378   | 390 | 1    | ---  | K.AKPKFSISPDLS.-                  |
| 1601.7755 | 1600.7682 | 1600.8429 | -46.66 | 208   | 221 | 0    | ---  | K.SMISATIHMQVVR.K + Oxidation (M) |

**No match to:** 856.5261, 936.5114, 1012.4944, 1038.5673, 1112.5431, 1141.5575, 1148.5789, 1169.6429, 1170.6307, 1244.5933, 1249.5964,

1262.6369, 1406.6653, 1435.7244, 1562.8891, 1617.7612, 1650.8884, 1718.8403, 1782.9277, 1919.0559, 2176.9539, 2421.1422

5. AN33B\_MOUSE Mass: 53797 Score: 30 Expect: 18 Matches: 5

Ankyrin repeat domain-containing protein 33B OS=Mus musculus GN=Ankrd33b PE=2 SV=1

**Observed Mr(expt) Mr(calc) ppm Start End Miss Ions Peptide**

1141.5575 1140.5502 1140.6001 -43.79 183 - 192 0 --- R.NIFGFTALMK.A  
1249.5964 1248.5892 1248.5955 -5.05 204 - 215 0 2 R.ALMMAGADVQAR.D + Oxidation (M)  
1435.7244 1434.7172 1434.6892 19.5 220 - 232 0 --- R.GLSPQEWAAAYTGRA  
1601.7755 1600.7682 1600.7814 -8.21 204 - 218 1 --- R.ALMMAGADVQARDPR.R  
1617.7612 1616.7539 1616.7763 -13.81 204 - 218 1 --- R.ALMMAGADVQARDPR.R + Oxidation (M)

**No match to:** 856.5261, 936.5114, 997.5256, 1012.4944, 1038.5673, 1112.5431, 1148.5789, 1169.6429, 1170.6307, 1231.5890, 1244.5933, 1262.6369, 1376.7110, 1406.6653, 1562.8891, 1650.8884, 1718.8403, 1782.9277, 1919.0559, 2176.9539, 2421.1422

6. RRBP1\_MOUSE Mass: 173232 Score: 29 Expect: 20 Matches: 7

Ribosome-binding protein 1 OS=Mus musculus GN=Rrbp1 PE=2 SV=2

**Observed Mr(expt) Mr(calc) ppm Start End Miss Ions Peptide**

997.5256 996.5183 996.5101 8.27 1097 - 1105 0 --- R.AQTSHANLR.A  
1148.5789 1147.5716 1147.5833 -10.18 189 - 200 1 --- K.ASSPATSSQGKK.G  
1249.5964 1248.5892 1248.6197 -24.48 1244 - 1254 1 --- R.SLTQAKEESEK.Q  
1376.7110 1375.7037 1375.6765 19.7 1516 - 1526 1 --- R.TACRIQEELEK.L  
1601.7755 1600.7682 1600.8308 -39.09 1427 - 1440 0 --- R.QLLLESQSLDEAK.S  
1782.9277 1781.9204 1781.9523 -17.91 1118 - 1133 1 --- R.VAELHSKLSSEVEVK.S  
2176.9539 2175.9466 2176.0153 -31.56 1407 - 1426 1 --- K.HMAAASAECQNYAKEVAGLR.Q

**No match to:** 856.5261, 936.5114, 1012.4944, 1038.5673, 1112.5431, 1141.5575, 1169.6429, 1170.6307, 1231.5890, 1244.5933, 1262.6369, 1406.6653, 1435.7244, 1562.8891, 1617.7612, 1650.8884, 1718.8403, 1919.0559, 2421.1422

7. AT2B2\_MOUSE Mass: 133701 Score: 29 Expect: 22 Matches: 6

Plasma membrane calcium-transporting ATPase 2 OS=Mus musculus GN=Atp2b2 PE=1 SV=2

**Observed Mr(expt) Mr(calc) ppm Start End Miss Ions Peptide**

1170.6307 1169.6234 1169.5928 26.2 478 - 488 0 --- K.EIPDPSSINAK.T  
1231.5890 1230.5817 1230.5840 -1.88 723 - 732 1 --- R.NEKGEIEQER.I  
1376.7110 1375.7037 1375.7460 -30.73 186 - 196 1 --- R.IEQEQKFTVVR.A  
1406.6653 1405.6580 1405.6006 40.9 570 - 580 1 --- K.MPDESRFRMYSK.G + Oxidation (M)  
1650.8884 1649.8811 1649.8447 22.1 785 - 801 1 --- K.KADVGFAMGIAGTDVAK.E  
1718.8403 1717.8330 1717.7764 33.0 255 - 270 0 --- K.DPMLLSGTHVMEGSGR.M + 2 Oxidation (M)

**No match to:** 856.5261, 936.5114, 997.5256, 1012.4944, 1038.5673, 1112.5431, 1141.5575, 1148.5789, 1169.6429, 1244.5933, 1249.5964, 1262.6369, 1435.7244, 1562.8891, 1601.7755, 1617.7612, 1782.9277, 1919.0559, 2176.9539, 2421.1422

8. TBX1\_MOUSE Mass: 51807 Score: 28 Expect: 28 Matches: 4

T-box transcription factor TBX1 OS=Mus musculus GN=Tbx1 PE=2 SV=2

**Observed Mr(expt) Mr(calc) ppm Start End Miss Ions Peptide**

997.5256 996.5183 996.5103 8.06 128 - 135 0 --- R.MFPTFQVK.L  
1169.6429 1168.6356 1168.6063 25.1 127 - 135 1 --- R.RMFPTFQVK.L + Oxidation (M)

1718.8403 1717.8330 1717.8246 4.87 41 - 57 0 --- R.YDPCAAVPGAPGPPPPR.A

1782.9277 1781.9204 1781.8849 19.9 387 - 402 0 --- R.LEAPGASEPLHHHPYK.Y

**No match to:** 856.5261, 936.5114, 1012.4944, 1038.5673, 1112.5431, 1141.5575, 1148.5789, 1170.6307, 1231.5890, 1244.5933, 1249.5964, 1262.6369, 1376.7110, 1406.6653, 1435.7244, 1562.8891, 1601.7755, 1617.7612, 1650.8884, 1919.0559, 2176.9539, 2421.1422

**9. CLPB\_MOUSE Mass: 76355 Score: 28 Expect: 29 Matches: 5**

Caseinolytic peptidase B protein homolog OS=Mus musculus GN=Clpb PE=1 SV=1

| Observed  | Mr(expt)  | Mr(calc)  | ppm    | Start | End | Miss | Ions | Peptide                           |
|-----------|-----------|-----------|--------|-------|-----|------|------|-----------------------------------|
| 936.5114  | 935.5041  | 935.4932  | 11.6   | 1     | 8   | 0    | ---  | -.MMLSAVLR.R + Oxidation (M)      |
| 997.5256  | 996.5183  | 996.5352  | -16.96 | 591   | 598 | 1    | ---  | R.SIKHEVER.R                      |
| 1249.5964 | 1248.5892 | 1248.5880 | 0.89   | 481   | 490 | 1    | 2    | R.QEALEMSRNR.I+ Oxidation (M)     |
| 1435.7244 | 1434.7172 | 1434.6660 | 35.6   | 491   | 503 | 0    | ---  | R.IAENLGDVQMSDK.I + Oxidation (M) |
| 1718.8403 | 1717.8330 | 1717.8093 | 13.8   | 379   | 392 | 1    | ---  | R.LDMSEFQERHEVAK.F                |

**No match to:** 856.5261, 1012.4944, 1038.5673, 1112.5431, 1141.5575, 1148.5789, 1169.6429, 1170.6307, 1231.5890, 1244.5933, 1262.6369, 1376.7110, 1406.6653, 1562.8891, 1601.7755, 1617.7612, 1650.8884, 1782.9277, 1919.0559, 2176.9539, 2421.1422

**10. CATM\_MOUSE Mass: 37898 Score: 27 Expect: 30 Matches: 5**

Cathepsin M OS=Mus musculus GN=Ctsm PE=2 SV=1

| Observed  | Mr(expt)  | Mr(calc)  | ppm    | Start | End | Miss | Ions | Peptide                            |
|-----------|-----------|-----------|--------|-------|-----|------|------|------------------------------------|
| 1012.4944 | 1011.4871 | 1011.5178 | -30.34 | 253   | 260 | 0    | ---  | R.HASFLFYK.R                       |
| 1038.5673 | 1037.5601 | 1037.5254 | 33.4   | 61    | 70  | 0    | ---  | K.LHNGENGLGK.H                     |
| 1148.5789 | 1147.5716 | 1147.5444 | 23.7   | 49    | 57  | 1    | ---  | K.RAVWEDNMK.K                      |
| 1601.7755 | 1600.7682 | 1600.7126 | 34.7   | 300   | 313 | 1    | ---  | K.NSMGTQWGNGGYMK.I                 |
| 1617.7612 | 1616.7539 | 1616.7075 | 28.7   | 300   | 313 | 1    | ---  | K.NSMGTQWGNGGYMK.I + Oxidation (M) |

**No match to:** 856.5261, 936.5114, 997.5256, 1112.5431, 1141.5575, 1169.6429, 1170.6307, 1231.5890, 1244.5933, 1249.5964, 1262.6369, 1376.7110, 1406.6653, 1435.7244, 1562.8891, 1650.8884, 1718.8403, 1782.9277, 1919.0559, 2176.9539, 2421.1422

**Search Parameters**

Type of search : MS/MS Ion Search  
Enzyme : Trypsin  
Fixed modifications : Carbamidomethyl (C)  
Variable modifications : Oxidation (M)  
Mass values : Monoisotopic  
Protein Mass : Unrestricted  
Peptide Mass Tolerance :  $\pm 50$  ppm  
Fragment Mass Tolerance:  $\pm 0.6$  Da  
Max Missed Cleavages : 1  
Instrument type : MALDI-TOF-TOF  
Query1 (856.5261,1+) : <no title>  
Query2 (936.5114,1+) : <no title>  
Query3 (997.5256,1+) : <no title>  
Query4 (1012.4944,1+) : <no title>  
Query5 (1038.5673,1+) : <no title>

Query6 (1112.5431,1+) : <no title>  
Query7 (1141.5575,1+) : <no title>  
Query8 (1148.5789,1+) : <no title>  
Query9 (1169.6429,1+) : <no title>  
Query10 (1170.6307,1+) : <no title>  
Query11 (1231.5890,1+) : <no title>  
Query12 (1244.5933,1+) : <no title>  
Query13 (1249.5964,1+) : <no title>  
Query14 (1262.6369,1+) : <no title>  
Query15 (1376.7110,1+) : <no title>  
Query16 (1406.6653,1+) : <no title>  
Query17 (1435.7244,1+) : <no title>  
Query18 (1562.8891,1+) : <no title>  
Query19 (1601.7755,1+) : <no title>  
Query20 (1617.7612,1+) : <no title>  
Query21 (1650.8884,1+) : <no title>  
Query22 (1718.8403,1+) : <no title>  
Query23 (1782.9277,1+) : <no title>  
Query24 (1919.0559,1+) : <no title>  
Query25 (2176.9539,1+) : <no title>  
Query26 (2421.1422,1+) : <no title>

**Mascot:** <http://www.matrixscience.com/>

# **MASCOT** Mascot Search Results **SCIENCE**

User :  
 Email :  
 Search title : Auto submitted by BioTools  
 Database : SwissProt 57.15 (515203 sequences; 181334896 residues)  
 Taxonomy : Mus musculus (house mouse) (16230 sequences)  
 Timestamp : 5 Nov 2013 at 04:46:17 GMT  
 Warning : A Peptide summary report will usually give a much clearer picture of MS/MS search results.  
 Top Score : 154 for COPE\_MOUSE, Coatomer subunit epsilon OS=Mus musculus GN=Cope PE=2 SV=3

## Mascot Score Histogram

Protein score is  $-10 \cdot \log(P)$ , where P is the probability that the observed match is a random event.

Protein scores greater than 55 are significant ( $p < 0.05$ ).

Protein scores are derived from ions scores as a non-probabilistic basis for ranking protein hits.

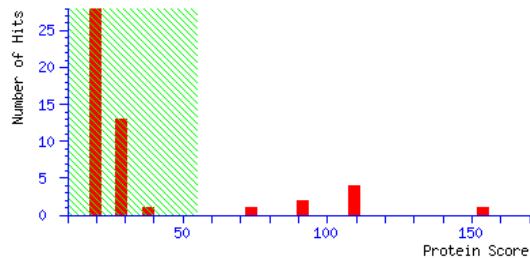

## Protein Summary Report

### Index

| Accession                       | Mass   | Score | Description                                                                           |
|---------------------------------|--------|-------|---------------------------------------------------------------------------------------|
| 1. <a href="#">COPE_MOUSE</a>   | 34773  | 154   | Coatomer subunit epsilon OS=Mus musculus GN=Cope PE=2 SV=3                            |
| 2. <a href="#">ACTH_MOUSE</a>   | 42249  | 108   | Actin, gamma-enteric smooth muscle OS=Mus musculus GN=Actg2 PE=2 SV=1                 |
| 3. <a href="#">ACTA_MOUSE</a>   | 42381  | 108   | Actin, aortic smooth muscle OS=Mus musculus GN=Acta2 PE=1 SV=1                        |
| 4. <a href="#">ACTC_MOUSE</a>   | 42334  | 108   | Actin, alpha cardiac muscle 1 OS=Mus musculus GN=Actc1 PE=1 SV=1                      |
| 5. <a href="#">ACTS_MOUSE</a>   | 42366  | 107   | Actin, alpha skeletal muscle OS=Mus musculus GN=Acta1 PE=1 SV=1                       |
| 6. <a href="#">ACTB_MOUSE</a>   | 42052  | 96    | Actin, cytoplasmic 1 OS=Mus musculus GN=Actb PE=1 SV=1                                |
| 7. <a href="#">ACTG_MOUSE</a>   | 42108  | 96    | Actin, cytoplasmic 2 OS=Mus musculus GN=Actg1 PE=1 SV=1                               |
| 8. <a href="#">ACTBL_MOUSE</a>  | 42319  | 73    | Beta-actin-like protein 2 OS=Mus musculus GN=Actbl2 PE=2 SV=1                         |
| 9. <a href="#">CCD73_MOUSE</a>  | 121056 | 40    | Coiled-coil domain-containing protein 73 OS=Mus musculus GN=Ccdc73 PE=1 SV=2          |
| 10. <a href="#">NHRF2_MOUSE</a> | 37722  | 32    | Na(+)/H(+) exchange regulatory cofactor NHE-RF2 OS=Mus musculus GN=Slc9a3r2 PE=1 SV=2 |

## Results List

1. [COPE\\_MOUSE](#) Mass: 34773 Score: 154 Expect: 6.5e-012 Matches: 7



Coatomer subunit epsilon OS=Mus musculus GN=Cope PE=2 SV=3

**Observed Mr(expt) Mr(calc) ppm Start End Miss Ions Peptide**

812.4127 811.4054 811.4228 -21.48 53 - 58 0 --- R.DVFLYR.A  
1059.5264 1058.5191 1058.5608 -39.34 98 - 106 0 --- R.DSIVLELDR.E  
1458.6116 1457.6044 1457.6609 -38.77 86 - 97 0 24 R.MFAEYLASENQR.D  
1474.5907 1473.5834 1473.6558 -49.10 86 - 97 0 --- R.MFAEYLASENQR.D + Oxidation (M)  
2061.8752 2060.8679 2060.9374 -33.71 24 - 40 0 32 K.NAFYIGSYQQCINEAQR.V  
2171.1007 2170.0934 2170.1634 -32.22 66 - 85 0 37 K.YGVVLDEIKPSSAPELQAVR.M  
2299.1626 2298.1553 2298.2583 -44.82 65 - 85 1 --- R.KYGVVLDEIKPSSAPELQAVR.M

**No match to:** 937.5480, 945.5285, 976.4209, 1130.5238, 1132.4911, 1194.5902, 1198.6609, 1347.6438, 1379.6173, 1395.7317, 1419.8006, 1533.6625, 1547.6838, 1556.6491, 1752.7941, 1790.8248, 1804.8276, 1976.9548, 2137.9493, 2148.9656, 2154.9821

**2. ACTH\_MOUSE Mass: 42249 Score: 108 Expect: 2.6e-007 Matches: 5**

Actin, gamma-enteric smooth muscle OS=Mus musculus GN=Actg2 PE=2 SV=1

**Observed Mr(expt) Mr(calc) ppm Start End Miss Ions Peptide**

976.4209 975.4136 975.4410 -28.06 20 - 29 0 --- K.AGFAGDDAPR.A  
1130.5238 1129.5165 1129.5404 -21.13 198 - 207 0 --- R.GYSFVTTAER.E  
1198.6609 1197.6536 1197.6982 -37.25 30 - 40 0 --- R.AVFP SIVGRPR.H  
1790.8248 1789.8175 1789.8846 -37.51 240 - 255 0 67 K.SYELPDGQVITIGNER.F  
1976.9548 1975.9475 1975.8986 24.8 70 - 85 0 --- K.YPIEHG IITNWDDMEK.I + Oxidation (M)

**No match to:** 812.4127, 937.5480, 945.5285, 1059.5264, 1132.4911, 1194.5902, 1347.6438, 1379.6173, 1395.7317, 1419.8006, 1458.6116, 1474.5907, 1533.6625, 1547.6838, 1556.6491, 1752.7941, 1804.8276, 2061.8752, 2137.9493, 2148.9656, 2154.9821, 2171.1007, 2299.1626

**3. ACTA\_MOUSE Mass: 42381 Score: 108 Expect: 2.6e-007 Matches: 5**

Actin, aortic smooth muscle OS=Mus musculus GN=Acta2 PE=1 SV=1

**Observed Mr(expt) Mr(calc) ppm Start End Miss Ions Peptide**

976.4209 975.4136 975.4410 -28.06 21 - 30 0 --- K.AGFAGDDAPR.A  
1130.5238 1129.5165 1129.5404 -21.13 199 - 208 0 --- R.GYSFVTTAER.E  
1198.6609 1197.6536 1197.6982 -37.25 31 - 41 0 --- R.AVFP SIVGRPR.H  
1790.8248 1789.8175 1789.8846 -37.51 241 - 256 0 67 K.SYELPDGQVITIGNER.F  
1976.9548 1975.9475 1975.8986 24.8 71 - 86 0 --- K.YPIEHG IITNWDDMEK.I + Oxidation (M)

**No match to:** 812.4127, 937.5480, 945.5285, 1059.5264, 1132.4911, 1194.5902, 1347.6438, 1379.6173, 1395.7317, 1419.8006, 1458.6116, 1474.5907, 1533.6625, 1547.6838, 1556.6491, 1752.7941, 1804.8276, 2061.8752, 2137.9493, 2148.9656, 2154.9821, 2171.1007, 2299.1626

**4. ACTC\_MOUSE Mass: 42334 Score: 108 Expect: 2.6e-007 Matches: 5**

Actin, alpha cardiac muscle 1 OS=Mus musculus GN=Actc1 PE=1 SV=1

**Observed Mr(expt) Mr(calc) ppm Start End Miss Ions Peptide**

976.4209 975.4136 975.4410 -28.06 21 - 30 0 --- K.AGFAGDDAPR.A  
1130.5238 1129.5165 1129.5404 -21.13 199 - 208 0 --- R.GYSFVTTAER.E  
1198.6609 1197.6536 1197.6982 -37.25 31 - 41 0 --- R.AVFP SIVGRPR.H  
1790.8248 1789.8175 1789.8846 -37.51 241 - 256 0 67 K.SYELPDGQVITIGNER.F  
1976.9548 1975.9475 1975.8986 24.8 71 - 86 0 --- K.YPIEHG IITNWDDMEK.I + Oxidation (M)

**No match to:** 812.4127, 937.5480, 945.5285, 1059.5264, 1132.4911, 1194.5902, 1347.6438, 1379.6173, 1395.7317, 1419.8006, 1458.6116,

1474.5907, 1533.6625, 1547.6838, 1556.6491, 1752.7941, 1804.8276, 2061.8752, 2137.9493, 2148.9656, 2154.9821, 2171.1007, 2299.1626

5. ACTS\_MOUSE Mass: 42366 Score: 107 Expect: 3.2e-007 Matches: 5

Actin, alpha skeletal muscle OS=Mus musculus GN=Acta1 PE=1 SV=1

**Observed Mr(expt) Mr(calc) ppm Start End Miss Ions Peptide**

976.4209 975.4136 975.4410 -28.06 21 - 30 0 --- K.AGFAGDDAPR.A  
1130.5238 1129.5165 1129.5404 -21.13 199 - 208 0 --- R.GYSFVTTAER.E  
1198.6609 1197.6536 1197.6982 -37.25 31 - 41 0 --- R.AVFP SIVGRPR.H  
1790.8248 1789.8175 1789.8846 -37.51 241 - 256 0 67 K.SYELPDGQVITIGNER.F  
1976.9548 1975.9475 1975.8986 24.8 71 - 86 0 --- K.YPIEHGIITNWDDMEK.I + Oxidation (M)

**No match to:** 812.4127, 937.5480, 945.5285, 1059.5264, 1132.4911, 1194.5902, 1347.6438, 1379.6173, 1395.7317, 1419.8006, 1458.6116, 1474.5907, 1533.6625, 1547.6838, 1556.6491, 1752.7941, 1804.8276, 2061.8752, 2137.9493, 2148.9656, 2154.9821, 2171.1007, 2299.1626

6. ACTB\_MOUSE Mass: 42052 Score: 96 Expect: 4.3e-006 Matches: 4

Actin, cytoplasmic 1 OS=Mus musculus GN=Actb PE=1 SV=1

**Observed Mr(expt) Mr(calc) ppm Start End Miss Ions Peptide**

976.4209 975.4136 975.4410 -28.06 19 - 28 0 --- K.AGFAGDDAPR.A  
1132.4911 1131.4839 1131.5197 -31.62 197 - 206 0 --- R.GYSFTTAER.E  
1198.6609 1197.6536 1197.6982 -37.25 29 - 39 0 --- R.AVFP SIVGRPR.H  
1790.8248 1789.8175 1789.8846 -37.51 239 - 254 0 67 K.SYELPDGQVITIGNER.F

**No match to:** 812.4127, 937.5480, 945.5285, 1059.5264, 1130.5238, 1194.5902, 1347.6438, 1379.6173, 1395.7317, 1419.8006, 1458.6116, 1474.5907, 1533.6625, 1547.6838, 1556.6491, 1752.7941, 1804.8276, 1976.9548, 2061.8752, 2137.9493, 2148.9656, 2154.9821, 2171.1007, 2299.1626

7. ACTG\_MOUSE Mass: 42108 Score: 96 Expect: 4.3e-006 Matches: 4

Actin, cytoplasmic 2 OS=Mus musculus GN=Actg1 PE=1 SV=1

**Observed Mr(expt) Mr(calc) ppm Start End Miss Ions Peptide**

976.4209 975.4136 975.4410 -28.06 19 - 28 0 --- K.AGFAGDDAPR.A  
1132.4911 1131.4839 1131.5197 -31.62 197 - 206 0 --- R.GYSFTTAER.E  
1198.6609 1197.6536 1197.6982 -37.25 29 - 39 0 --- R.AVFP SIVGRPR.H  
1790.8248 1789.8175 1789.8846 -37.51 239 - 254 0 67 K.SYELPDGQVITIGNER.F

**No match to:** 812.4127, 937.5480, 945.5285, 1059.5264, 1130.5238, 1194.5902, 1347.6438, 1379.6173, 1395.7317, 1419.8006, 1458.6116, 1474.5907, 1533.6625, 1547.6838, 1556.6491, 1752.7941, 1804.8276, 1976.9548, 2061.8752, 2137.9493, 2148.9656, 2154.9821, 2171.1007, 2299.1626

8. ACTBL\_MOUSE Mass: 42319 Score: 73 Expect: 0.00089 Matches: 1

Beta-actin-like protein 2 OS=Mus musculus GN=Actb2 PE=2 SV=1

**Observed Mr(expt) Mr(calc) ppm Start End Miss Ions Peptide**

1790.8248 1789.8175 1789.8846 -37.51 240 - 255 0 67 R.SYELPDGQVITIGNER.F

**No match to:** 812.4127, 937.5480, 945.5285, 976.4209, 1059.5264, 1130.5238, 1132.4911, 1194.5902, 1198.6609, 1347.6438, 1379.6173, 1395.7317, 1419.8006, 1458.6116, 1474.5907, 1533.6625, 1547.6838, 1556.6491, 1752.7941, 1804.8276, 1976.9548, 2061.8752, 2137.9493, 2148.9656, 2154.9821, 2171.1007, 2299.1626

9. CCD73 MOUSE Mass: 121056 Score: 40 Expect: 1.8 Matches: 8

Coiled-coil domain-containing protein 73 OS=Mus musculus GN=Ccdc73 PE=1 SV=2

| Observed  | Mr(expt)  | Mr(calc)  | ppm    | Start     | End | Miss | Ions | Peptide                            |
|-----------|-----------|-----------|--------|-----------|-----|------|------|------------------------------------|
| 945.5285  | 944.5213  | 944.5178  | 3.64   | 117 - 124 | 1   | ---  |      | K.EKEIEGLK.E                       |
| 1059.5264 | 1058.5191 | 1058.5720 | -49.96 | 936 - 944 | 1   | ---  |      | K.NVVLDDTRK.N                      |
| 1198.6609 | 1197.6536 | 1197.6353 | 15.3   | 207 - 216 | 1   | ---  |      | K.QESEIHSLKK.E                     |
| 1347.6438 | 1346.6365 | 1346.6426 | -4.54  | 944 - 955 | 1   | ---  |      | R.KNIESDPTNSNR.A                   |
| 1379.6173 | 1378.6100 | 1378.5605 | 35.9   | 575 - 587 | 0   | ---  |      | K.ASSNGMSNEMAHK.R + Oxidation (M)  |
| 1533.6625 | 1532.6553 | 1532.6929 | -24.57 | 432 - 443 | 1   | ---  |      | K.NTKSFCLDTEYR.E                   |
| 1752.7941 | 1751.7868 | 1751.7567 | 17.2   | 664 - 677 | 1   | ---  |      | K.QMVREESQCSTEPR.S + Oxidation (M) |
| 1976.9548 | 1975.9475 | 1976.0401 | -46.85 | 927 - 943 | 1   | ---  |      | R.VITPVTFCKNVVLDDTR.K              |

No match to: 812.4127, 937.5480, 976.4209, 1130.5238, 1132.4911, 1194.5902, 1395.7317, 1419.8006, 1458.6116, 1474.5907, 1547.6838, 1556.6491, 1790.8248, 1804.8276, 2061.8752, 2137.9493, 2148.9656, 2154.9821, 2171.1007, 2299.1626

10. NHRF2 MOUSE Mass: 37722 Score: 32 Expect: 9.8 Matches: 4

Na(+)/H(+) exchange regulatory co factor NHE-RF2 OS=Mus musculus GN=Slc9a3r2 PE=1 SV=2

| Observed  | Mr(expt)  | Mr(calc)  | ppm    | Start     | End | Miss | Ions | Peptide                         |
|-----------|-----------|-----------|--------|-----------|-----|------|------|---------------------------------|
| 1059.5264 | 1058.5191 | 1058.5356 | -15.55 | 216 - 224 | 1   | ---  |      | R.IKAQEDEAR.L                   |
| 1458.6116 | 1457.6044 | 1457.6688 | -44.19 | 17 - 29   | 0   | ---  |      | R.GEQGYGFHLHGEK.G               |
| 1547.6838 | 1546.6765 | 1546.6980 | -13.91 | 99 - 110  | 1   | ---  |      | R.RQLTCTEEMHR.G + Oxidation (M) |
| 2154.9821 | 2153.9748 | 2154.0593 | -39.22 | 293 - 312 | 1   | ---  |      | R.DPFQESGLHLSPTAAEAKEK.A        |

No match to: 812.4127, 937.5480, 945.5285, 976.4209, 1130.5238, 1132.4911, 1194.5902, 1198.6609, 1347.6438, 1379.6173, 1395.7317, 1419.8006, 1474.5907, 1533.6625, 1556.6491, 1752.7941, 1790.8248, 1804.8276, 1976.9548, 2061.8752, 2137.9493, 2148.9656, 2171.1007, 2299.1626

Search Parameters

Type of search : MS/MS Ion Search  
Enzyme : Trypsin  
Fixed modifications : Carbamidomethyl (C)  
Variable modifications : Oxidation (M)  
Mass values : Monoisotopic  
Protein Mass : Unrestricted  
Peptide Mass Tolerance :  $\pm 50$  ppm  
Fragment Mass Tolerance:  $\pm 0.6$  Da  
Max Missed Cleavages : 1  
Instrument type : MALDI-TOF-TOF  
Query1 (812.4127,1+) : <no title>  
Query2 (937.5480,1+) : <no title>  
Query3 (945.5285,1+) : <no title>  
Query4 (976.4209,1+) : <no title>  
Query5 (1059.5264,1+) : <no title>  
Query6 (1130.5238,1+) : <no title>  
Query7 (1132.4911,1+) : <no title>

Query8 (1194.5902,1+) : <no title>  
Query9 (1198.6609,1+) : <no title>  
Query10 (1347.6438,1+) : <no title>  
Query11 (1379.6173,1+) : <no title>  
Query12 (1395.7317,1+) : <no title>  
Query13 (1419.8006,1+) : <no title>  
Query14 (1458.6116,1+) : <no title>  
Query15 (1474.5907,1+) : <no title>  
Query16 (1533.6625,1+) : <no title>  
Query17 (1547.6838,1+) : <no title>  
Query18 (1556.6491,1+) : <no title>  
Query19 (1752.7941,1+) : <no title>  
Query20 (1790.8248,1+) : <no title>  
Query21 (1804.8276,1+) : <no title>  
Query22 (1976.9548,1+) : <no title>  
Query23 (2061.8752,1+) : <no title>  
Query24 (2137.9493,1+) : <no title>  
Query25 (2148.9656,1+) : <no title>  
Query26 (2154.9821,1+) : <no title>  
Query27 (2171.1007,1+) : <no title>  
Query28 (2299.1626,1+) : <no title>

**Mascot:** <http://www.matrixscience.com/>

# **MASCOT** Mascot Search Results

**User** :  
**Email** :  
**Search title** : Auto submitted by BioTools  
**Database** : SwissProt 57.15 (515203 sequences; 181334896 residues)  
**Taxonomy** : Mus musculus (house mouse) (16230 sequences)  
**Timestamp** : 5 Nov 2013 at 04:45:50 GMT  
**Warning** : A Peptide summary report will usually give a much clearer picture of MS/MS search results.  
**Top Score** : 80 for TRY2\_MOUSE, Anionic trypsin-2 OS=Mus musculus GN=Prss2 PE=2 SV=1

## Mascot Score Histogram

Protein score is  $-10 \cdot \log(P)$ , where P is the probability that the observed match is a random event.

Protein scores greater than 55 are significant ( $p < 0.05$ ).

Protein scores are derived from ions scores as a non-probabilistic basis for ranking protein hits.

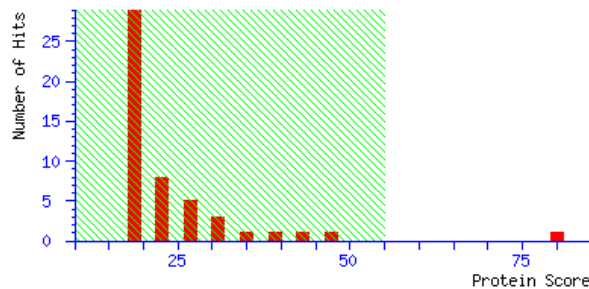

## Protein Summary Report

### Index

| Accession                       | Mass   | Score | Description                                                                                |
|---------------------------------|--------|-------|--------------------------------------------------------------------------------------------|
| 1. <a href="#">TRY2_MOUSE</a>   | 26871  | 80    | Anionic trypsin-2 OS=Mus musculus GN=Prss2 PE=2 SV=1                                       |
| 2. <a href="#">Z518A_MOUSE</a>  | 167667 | 48    | Zinc finger protein 518A OS=Mus musculus GN=Zn518a PE=1 SV=1                               |
| 3. <a href="#">FOXQ1_MOUSE</a>  | 41716  | 44    | Forkhead box protein Q1 OS=Mus musculus GN=Foxq1 PE=2 SV=2                                 |
| 4. <a href="#">E12BD_MOUSE</a>  | 58130  | 41    | Translation initiation factor eIF-2B subunit delta OS=Mus musculus GN=Ei2b4 PE=2 SV=1      |
| 5. <a href="#">NPS3A_MOUSE</a>  | 28405  | 34    | Protein NipSnap homolog 3A OS=Mus musculus GN=Nipsnap3a PE=1 SV=1                          |
| 6. <a href="#">K1C18_MOUSE</a>  | 47509  | 31    | Keratin, type I cytoskeletal 18 OS=Mus musculus GN=Krt18 PE=1 SV=5                         |
| 7. <a href="#">FUMH_MOUSE</a>   | 54564  | 30    | Fumarate hydratase, mitochondrial OS=Mus musculus GN=Fh PE=1 SV=2                          |
| 8. <a href="#">KANK3_MOUSE</a>  | 84648  | 29    | KN motif and ankyrin repeat domain-containing protein 3 OS=Mus musculus GN=Kank3 PE=2 SV=1 |
| 9. <a href="#">NINJ2_MOUSE</a>  | 15984  | 28    | Ninjurin-2 OS=Mus musculus GN=Ninj2 PE=2 SV=1                                              |
| 10. <a href="#">TSAP1_MOUSE</a> | 32744  | 27    | tRNA selenocysteine 1-associated protein 1 OS=Mus musculus GN=Tmau1ap PE=1 SV=2            |

## Results List

1. TRY2\_MOUSE Mass: 26871 Score: 80 Expect: 0.00016 Matches: 2

Anionic trypsin-2 OS=Mus musculus GN=Prss2 PE=2 SV=1

**Observed Mr(expt) Mr(calc) ppm Start End Miss Ions Peptide**

1041.5937 1040.5864 1040.5978 -10.96 113 - 122 0 57 K.LASPVTLNAR.V

2213.0290 2212.0217 2212.0760 -24.54 73 - 92 0 --- R.LGEHNINVLGNEQFVDSAK.I

**No match to:** 1011.6013, 1069.5950, 1250.7584, 1266.7452, 1520.7523, 1856.8076, 2121.9352, 2235.0383, 2250.0416

2. Z518A\_MOUSE Mass: 167667 Score: 48 Expect: 0.24 Matches: 3

Zinc finger protein 518A OS=Mus musculus GN=Zn518a PE=1 SV=1

**Observed Mr(expt) Mr(calc) ppm Start End Miss Ions Peptide**

1041.5937 1040.5864 1040.6230 -35.14 960 - 969 0 31 R.SVPATLLVNK.K

1520.7523 1519.7451 1519.7842 -25.75 24 - 37 1 --- R.NEIADTIRSVSTSK.I

2235.0383 2234.0310 2233.9885 19.0 1434 - 1451 1 --- K.TTSEDVLKSFNCWFCGR.V

**No match to:** 1011.6013, 1069.5950, 1250.7584, 1266.7452, 1856.8076, 2121.9352, 2213.0290, 2250.0416

3. FOXQ1\_MOUSE Mass: 41716 Score: 44 Expect: 0.72 Matches: 2

Forkhead box protein Q1 OS=Mus musculus GN=Foxq1 PE=2 SV=2

**Observed Mr(expt) Mr(calc) ppm Start End Miss Ions Peptide**

1041.5937 1040.5864 1040.5727 13.2 244 - 253 1 26 R.SSPIARSPAR.Q

1520.7523 1519.7451 1519.7361 5.90 149 - 160 1 --- K.FPFRGSYTGWR.N

**No match to:** 1011.6013, 1069.5950, 1250.7584, 1266.7452, 1856.8076, 2121.9352, 2213.0290, 2235.0383, 2250.0416

4. EI2BD\_MOUSE Mass: 58130 Score: 41 Expect: 1.3 Matches: 1

Translation initiation factor eIF-2B subunit delta OS=Mus musculus GN=Ei2b4 PE=2 SV=1

**Observed Mr(expt) Mr(calc) ppm Start End Miss Ions Peptide**

1041.5937 1040.5864 1040.6342 -45.92 313 - 322 0 35 K.IVLAAQAISR.F

**No match to:** 1011.6013, 1069.5950, 1250.7584, 1266.7452, 1520.7523, 1856.8076, 2121.9352, 2213.0290, 2235.0383, 2250.0416

5. NPS3A\_MOUSE Mass: 28405 Score: 34 Expect: 6.9 Matches: 2

Protein NipSnap homolog 3A OS=Mus musculus GN=Nipsnap3a PE=1 SV=1

**Observed Mr(expt) Mr(calc) ppm Start End Miss Ions Peptide**

1041.5937 1040.5864 1040.6091 -21.76 6 - 15 1 12 R.SGLRTALAPR.V

2213.0290 2212.0217 2212.0953 -33.26 31 - 48 1 --- R.QSNGTFYEFRTYFLKPSK.T

**No match to:** 1011.6013, 1069.5950, 1250.7584, 1266.7452, 1520.7523, 1856.8076, 2121.9352, 2235.0383, 2250.0416

6. K1C18\_MOUSE Mass: 47509 Score: 31 Expect: 14 Matches: 2

Keratin, type I cytoskeletal 18 OS=Mus musculus GN=Krt18 PE=1 SV=5

**Observed Mr(expt) Mr(calc) ppm Start End Miss Ions Peptide**

1041.5937 1040.5864 1040.5978 -10.96 143 - 151 0 12 R.IVLQIDNAR.L

2250.0416 2249.0343 2249.0746 -17.91 161 - 179 1 --- K.YETELAMRQSVESDIHGLR.K + Oxidation (M)

**No match to:** 1011.6013, 1069.5950, 1250.7584, 1266.7452, 1520.7523, 1856.8076, 2121.9352, 2213.0290, 2235.0383

7. FUMH\_MOUSE Mass: 54564 Score: 30 Expect: 14 Matches: 3

Fumarate hydratase, mitochondrial OS=Mus musculus GN=Fh PE=1 SV=2

**Observed Mr(expt) Mr(calc) ppm Start End Miss Ions Peptide**

1069.5950 1068.5877 1068.5927 -4.69 211 - 220 1 --- K.LHDALSAKSK.E

2121.9352 2120.9279 2120.9837 -26.30 41 - 58 1 --- R.MASQNSFRVEFDTFGELK.V + Oxidation (M)

2235.0383 2234.0310 2234.1252 -42.18 99 - 119 1 --- R.AAAEVNQEYGLDPKIASAIMK.A + Oxidation (M)

**No match to:** 1011.6013, 1041.5937, 1250.7584, 1266.7452, 1520.7523, 1856.8076, 2213.0290, 2250.0416

8. KANK3\_MOUSE Mass: 84648 Score: 29 Expect: 19 Matches: 2

KN motif and ankyrin repeat domain-containing protein 3 OS=Mus musculus GN=Kank3 PE=2 SV=1

**Observed Mr(expt) Mr(calc) ppm Start End Miss Ions Peptide**

1041.5937 1040.5864 1040.6091 -21.76 149 - 158 1 15 R.ALSPARAVTR.S

2213.0290 2212.0217 2211.9815 18.2 509 - 528 1 --- K.DAGDCELETHPELTAGREGR.C

**No match to:** 1011.6013, 1069.5950, 1250.7584, 1266.7452, 1520.7523, 1856.8076, 2121.9352, 2235.0383, 2250.0416

9. NINJ2\_MOUSE Mass: 15984 Score: 28 Expect: 25 Matches: 2

Ninjurin-2 OS=Mus musculus GN=Ninj2 PE=2 SV=1

**Observed Mr(expt) Mr(calc) ppm Start End Miss Ions Peptide**

1520.7523 1519.7451 1519.7491 -2.68 2 - 13 1 --- M.ESDRETIHLQHR.H

2213.0290 2212.0217 2212.1054 -37.82 33 - 52 1 --- K.SVAESMLDVALFMSNAMRLK.S

**No match to:** 1011.6013, 1041.5937, 1069.5950, 1250.7584, 1266.7452, 1856.8076, 2121.9352, 2235.0383, 2250.0416

10. TSAP1\_MOUSE Mass: 32744 Score: 27 Expect: 31 Matches: 1

tRNA selenocysteine 1-associated protein 1 OS=Mus musculus GN=Tmau1ap PE=1 SV=2

**Observed Mr(expt) Mr(calc) ppm Start End Miss Ions Peptide**

1041.5937 1040.5864 1040.6342 -45.92 170 - 179 1 19 R.LSVAIPKASR.V

**No match to:** 1011.6013, 1069.5950, 1250.7584, 1266.7452, 1520.7523, 1856.8076, 2121.9352, 2213.0290, 2235.0383, 2250.0416

**Search Parameters**

Type of search : MS/MS Ion Search

Enzyme : Trypsin

Fixed modifications : Carbamidomethyl (C)

Variable modifications : Oxidation (M)

Mass values : Monoisotopic

Protein Mass : Unrestricted

Peptide Mass Tolerance :  $\pm 50$  ppm

Fragment Mass Tolerance:  $\pm 0.6$  Da

Max Missed Cleavages : 1

Instrument type : MALDI-TOF-TOF

Query1 (1011.6013,1+) : <no title>

Query2 (1041.5937,1+) : <no title>

Query3 (1069.5950,1+) : <no title>

Query4 (1250.7584,1+) : <no title>

Query5 (1266.7452,1+) : <no title>

Query6 (1520.7523,1+) : <no title>

Query7 (1856.8076,1+) : <no title>

Query8 (2121.9352,1+) : <no title>

Query9 (2213.0290,1+) : <no title>

Query10 (2235.0383,1+) : <no title>

Query11 (2250.0416,1+) : <no title>

**Mascot:** <http://www.matrixscience.com/>



# **MASCOT** Mascot Search Results **SCIENCE**

User :  
 Email :  
 Search title : Auto submitted by BioTools  
 Database : SwissProt 57.15 (515203 sequences; 181334896 residues)  
 Taxonomy : Mus musculus (house mouse) (16230 sequences)  
 Timestamp : 5 Nov 2013 at 04:45:41 GMT  
 Warning : A Peptide summary report will usually give a much clearer picture of MS/MS search results.  
 Top Score : 129 for OAT\_MOUSE, Ornithine aminotransferase, mitochondrial OS=Mus musculus GN=Oat PE=1 SV=1

## Mascot Score Histogram

Protein score is  $-10 \cdot \log(P)$ , where P is the probability that the observed match is a random event.

Protein scores greater than 55 are significant ( $p < 0.05$ ).

Protein scores are derived from ions scores as a non-probabilistic basis for ranking protein hits.

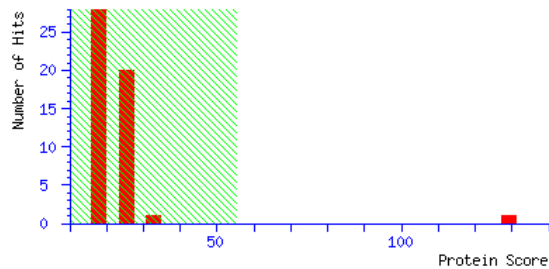

## Protein Summary Report

### Index

| Accession                       | Mass  | Score | Description                                                                             |
|---------------------------------|-------|-------|-----------------------------------------------------------------------------------------|
| 1. <a href="#">OAT_MOUSE</a>    | 48723 | 129   | Ornithine aminotransferase, mitochondrial OS=Mus musculus GN=Oat PE=1 SV=1              |
| 2. <a href="#">DDX3Y_MOUSE</a>  | 73838 | 31    | ATP-dependent RNA helicase DDX3Y OS=Mus musculus GN=Ddx3y PE=1 SV=2                     |
| 3. <a href="#">CDK3_MOUSE</a>   | 34038 | 28    | Cell division protein kinase 3 OS=Mus musculus GN=Cdk3 PE=1 SV=2                        |
| 4. <a href="#">SGPP2_MOUSE</a>  | 40507 | 28    | Sphingosine-1-phosphate phosphatase 2 OS=Mus musculus GN=Sgpp2 PE=2 SV=1                |
| 5. <a href="#">IFI4_MOUSE</a>   | 72347 | 28    | Interferon-activable protein 204 OS=Mus musculus GN=Ifi204 PE=1 SV=2                    |
| 6. <a href="#">LSM11_MOUSE</a>  | 40054 | 27    | U7 snRNA-associated Sm-like protein LSM11 OS=Mus musculus GN=Lsm11 PE=1 SV=1            |
| 7. <a href="#">SEPT11_MOUSE</a> | 50005 | 26    | Septin-11 OS=Mus musculus GN=Sept11 PE=1 SV=4                                           |
| 8. <a href="#">CF226_MOUSE</a>  | 12063 | 26    | Uncharacterized protein C6orf226 homolog OS=Mus musculus PE=2 SV=1                      |
| 9. <a href="#">ARID3C_MOUSE</a> | 43834 | 26    | AT-rich interactive domain-containing protein 3C OS=Mus musculus GN=Arid3c PE=2 SV=2    |
| 10. <a href="#">NKPD1_MOUSE</a> | 67758 | 25    | NTPase KAP family P-loop domain-containing protein 1 OS=Mus musculus GN=Nkpd1 PE=2 SV=2 |

## Results List

1. [OAT\\_MOUSE](#) Mass: 48723 Score: 129 Expect: 2e-009 Matches: 5

Ornithine aminotransferase, mitochondrial OS=Mus musculus GN=Oat PE=1 SV=1

**Observed Mr(expt) Mr(calc) ppm Start End Miss Ions Peptide**

1072.6388 1071.6316 1071.5924 36.5 363 - 372 0 --- K.LPSDVTTSVR.G  
1492.9196 1491.9124 1491.8660 31.1 414 - 426 1 48 R.LAPPLVIKEDEIR.E  
1619.9221 1618.9148 1618.8791 22.1 399 - 413 0 --- R.DNGLLAKPTHGDIIR.L  
1811.0434 1810.0361 1809.9737 34.5 256 - 271 0 33 R.HQVLFIADEIQTGLAR.T  
1889.1275 1888.1202 1888.0643 29.6 397 - 413 1 --- R.IRDNGLLAKPTHGDIIR.L

**No match to:** 1313.6580, 1535.8966, 1550.8923, 1602.9078, 1684.9577, 1823.0406, 1831.0568, 2085.1858, 2140.1497, 2177.1696, 2399.2348, 2405.4313, 2414.2248, 2431.2467

2. DDX3Y\_MOUSE Mass: 73838 Score: 31 Expect: 13 Matches: 4

ATP-dependent RNA helicase DDX3Y OS=Mus musculus GN=Ddx3y PE=1 SV=2

**Observed Mr(expt) Mr(calc) ppm Start End Miss Ions Peptide**

1313.6580 1312.6507 1312.6809 -23.03 362 - 372 1 --- R.RIVEQDTMPPK.G  
2177.1696 2176.1624 2176.1012 28.1 2 - 22 0 --- M.SQVAAESTAGLDQQFVGLDLK.S  
2399.2348 2398.2275 2398.2355 -3.33 387 - 406 1 --- K.EIQMLARDFLDEYIFLAVGR.V  
2431.2467 2430.2394 2430.2438 -1.80 294 - 314 1 --- R.VRPCVVYGGADTVQIRDLER.G

**No match to:** 1072.6388, 1492.9196, 1535.8966, 1550.8923, 1602.9078, 1619.9221, 1684.9577, 1811.0434, 1823.0406, 1831.0568, 1889.1275, 2085.1858, 2140.1497, 2405.4313, 2414.2248

3. CDK3\_MOUSE Mass: 34038 Score: 28 Expect: 25 Matches: 3

Cell division protein kinase 3 OS=Mus musculus GN=Cdk3 PE=1 SV=2

**Observed Mr(expt) Mr(calc) ppm Start End Miss Ions Peptide**

1072.6388 1071.6316 1071.6539 -20.86 51 - 59 1 --- R.EISLLKELK.H  
1602.9078 1601.9005 1601.9042 -2.29 143 - 157 1 --- K.LADFLARAFGVPLR.T  
2140.1497 2139.1424 2139.1787 -16.95 37 - 56 1 --- R.LDLEAEGVPSTAVREISLLK.E

**No match to:** 1313.6580, 1492.9196, 1535.8966, 1550.8923, 1619.9221, 1684.9577, 1811.0434, 1823.0406, 1831.0568, 1889.1275, 2085.1858, 2177.1696, 2399.2348, 2405.4313, 2414.2248, 2431.2467

4. SGPP2\_MOUSE Mass: 40507 Score: 28 Expect: 28 Matches: 3

Sphingosine-1-phosphate phosphatase 2 OS=Mus musculus GN=Sgpp2 PE=2 SV=1

**Observed Mr(expt) Mr(calc) ppm Start End Miss Ions Peptide**

1823.0406 1822.0333 1822.0505 -9.44 300 - 314 1 --- K.LSLQVLFVFWKVVTR.N  
1831.0568 1830.0495 1830.0841 -18.91 76 - 91 0 --- R.LVVIWVLMYIGQVAK.D  
2414.2248 2413.2176 2413.1379 33.0 28 - 46 1 --- R.EASGEEHVVKNYFYLLFR.F

**No match to:** 1072.6388, 1313.6580, 1492.9196, 1535.8966, 1550.8923, 1602.9078, 1619.9221, 1684.9577, 1811.0434, 1889.1275, 2085.1858, 2140.1497, 2177.1696, 2399.2348, 2405.4313, 2431.2467

5. IFI4\_MOUSE Mass: 72347 Score: 28 Expect: 29 Matches: 4

Interferon-activable protein 204 OS=Mus musculus GN=Ifi204 PE=1 SV=2

**Observed Mr(expt) Mr(calc) ppm Start End Miss Ions Peptide**

1313.6580 1312.6507 1312.6663 -11.91 560 - 571 0 --- R.GTFVSGEYLVNK.K  
1535.8966 1534.8893 1534.8290 39.3 590 - 602 1 --- K.MEVVVYGRLTNVR.C

1602.9078 1601.9005 1601.8453 34.5 301 - 313 1 --- K.KNFIIISNYFESK.G

2177.1696 2176.1624 2176.0616 46.3 523 - 542 0 --- R.ASCVSDVNVNPTMVISNTR.Q

**No match to:** 1072.6388, 1492.9196, 1550.8923, 1619.9221, 1684.9577, 1811.0434, 1823.0406, 1831.0568, 1889.1275, 2085.1858, 2140.1497, 2399.2348, 2405.4313, 2414.2248, 2431.2467

**6. LSM11\_MOUSE Mass: 40054 Score: 27 Expect: 31 Matches: 3**

U7 snRNA-associated Sm-like protein LSM11 OS=Mus musculus GN=Lsm11 PE=1 SV=1

**Observed Mr(expt) Mr(calc) ppm Start End Miss Ions Peptide**

1313.6580 1312.6507 1312.6486 1.59 182 - 193 0 --- R.GVCTGFLVAFDK.F

2177.1696 2176.1624 2176.1542 3.77 334 - 350 1 --- K.VDYQQVFTRHINQIFIR.G

2399.2348 2398.2275 2398.1991 11.8 194 - 213 1 --- K.FWNMALTVDVETRYRKPVLGK.A + Oxidation (M)

**No match to:** 1072.6388, 1492.9196, 1535.8966, 1550.8923, 1602.9078, 1619.9221, 1684.9577, 1811.0434, 1823.0406, 1831.0568, 1889.1275, 2085.1858, 2140.1497, 2405.4313, 2414.2248, 2431.2467

**7. SEP11\_MOUSE Mass: 50005 Score: 26 Expect: 38 Matches: 3**

Septin-11 OS=Mus musculus GN=Sept11 PE=1 SV=4

**Observed Mr(expt) Mr(calc) ppm Start End Miss Ions Peptide**

1619.9221 1618.9148 1618.8567 35.9 96 - 110 0 --- K.LTIVDTVGFQDQINK.D

2085.1858 2084.1785 2084.0974 38.9 400 - 419 1 --- K.AAAQLLQSQAQSGAQTKK.D

2140.1497 2139.1424 2139.0960 21.7 15 - 34 0 --- R.NLSLSGHVGFDSLDPQLVNK.S

**No match to:** 1072.6388, 1313.6580, 1492.9196, 1535.8966, 1550.8923, 1602.9078, 1684.9577, 1811.0434, 1823.0406, 1831.0568, 1889.1275, 2177.1696, 2399.2348, 2405.4313, 2414.2248, 2431.2467

**8. CF226\_MOUSE Mass: 12063 Score: 26 Expect: 45 Matches: 2**

Uncharacterized protein C6orf226 homolog OS=Mus musculus PE=2 SV=1

**Observed Mr(expt) Mr(calc) ppm Start End Miss Ions Peptide**

1313.6580 1312.6507 1312.6735 -17.39 90 - 100 1 --- R.TQPPTIEERSR.G

2399.2348 2398.2275 2398.1699 24.0 68 - 89 0 --- R.RPKPWEDAGSAASPCTIALDTR.T

**No match to:** 1072.6388, 1492.9196, 1535.8966, 1550.8923, 1602.9078, 1619.9221, 1684.9577, 1811.0434, 1823.0406, 1831.0568, 1889.1275, 2085.1858, 2140.1497, 2177.1696, 2405.4313, 2414.2248, 2431.2467

**9. ARI3C\_MOUSE Mass: 43834 Score: 26 Expect: 46 Matches: 3**

AT-rich interactive domain-containing protein 3C OS=Mus musculus GN=Arid3c PE=2 SV=2

**Observed Mr(expt) Mr(calc) ppm Start End Miss Ions Peptide**

1313.6580 1312.6507 1312.6922 -31.59 319 - 330 1 --- K.RAVLMGPVDSR.L + Oxidation (M)

1602.9078 1601.9005 1601.8447 34.9 295 - 309 1 --- R.LALPMGLASEATREK.L + Oxidation (M)

2177.1696 2176.1624 2176.1827 -9.33 320 - 340 1 --- R.AVLMGPVDSR.LGAPPSFLP.R.G

**No match to:** 1072.6388, 1492.9196, 1535.8966, 1550.8923, 1619.9221, 1684.9577, 1811.0434, 1823.0406, 1831.0568, 1889.1275, 2085.1858, 2140.1497, 2399.2348, 2405.4313, 2414.2248, 2431.2467

**10. NKPD1\_MOUSE Mass: 67758 Score: 25 Expect: 47 Matches: 3**

NTPase KAP family P-loop domain-containing protein 1 OS=Mus musculus GN=Nkpd1 PE=2 SV=2

**Observed Mr(expt) Mr(calc) ppm Start End Miss Ions Peptide**

2140.1497 2139.1424 2139.1246 8.34 156 - 178 0 --- K.ALGGAATTLSGSGLLMAVYSVGK.H + Oxidation (M)  
2399.2348 2398.2275 2398.2605 -13.74 540 - 563 1 --- R.AVSALKPPSPKSPSQDGPQASPR.A  
2414.2248 2413.2176 2413.2590 -17.16 427 - 447 1 --- R.VGTPRHAVAWVVLANQWPCRL  
**No match to:** 1072.6388, 1313.6580, 1492.9196, 1535.8966, 1550.8923, 1602.9078, 1619.9221, 1684.9577, 1811.0434, 1823.0406, 1831.0568,  
1889.1275, 2085.1858, 2177.1696, 2405.4313, 2431.2467

#### Search Parameters

Type of search : MS/MS Ion Search  
Enzyme : Trypsin  
Fixed modifications : Carbamidomethyl (C)  
Variable modifications : Oxidation (M)  
Mass values : Monoisotopic  
Protein Mass : Unrestricted  
Peptide Mass Tolerance :  $\pm 50$  ppm  
Fragment Mass Tolerance:  $\pm 0.6$  Da  
Max Missed Cleavages : 1  
Instrument type : MALDI-TOF-TOF  
Query1 (1072.6388,1+) : <no title>  
Query2 (1313.6580,1+) : <no title>  
Query3 (1492.9196,1+) : <no title>  
Query4 (1535.8966,1+) : <no title>  
Query5 (1550.8923,1+) : <no title>  
Query6 (1602.9078,1+) : <no title>  
Query7 (1619.9221,1+) : <no title>  
Query8 (1684.9577,1+) : <no title>  
Query9 (1811.0434,1+) : <no title>  
Query10 (1823.0406,1+) : <no title>  
Query11 (1831.0568,1+) : <no title>  
Query12 (1889.1275,1+) : <no title>  
Query13 (2085.1858,1+) : <no title>  
Query14 (2140.1497,1+) : <no title>  
Query15 (2177.1696,1+) : <no title>  
Query16 (2399.2348,1+) : <no title>  
Query17 (2405.4313,1+) : <no title>  
Query18 (2414.2248,1+) : <no title>  
Query19 (2431.2467,1+) : <no title>

**Mascot:** <http://www.matrixscience.com/>

# **MASCOT** Mascot Search Results

**User** :  
**Email** :  
**Search title** : Auto submitted by BioTools  
**Database** : SwissProt 57.15 (515203 sequences; 181334896 residues)  
**Taxonomy** : Mus musculus (house mouse) (16230 sequences)  
**Timestamp** : 5 Nov 2013 at 04:45:32 GMT  
**Warning** : A Peptide summary report will usually give a much clearer picture of MS/MS search results.  
**Top Score** : 88for ALBU\_MOUSE, Serum albumin OS=Mus musculus GN=Alb PE=1 SV=3

## Mascot Score Histogram

Protein score is  $-10 \cdot \log(P)$ , where P is the probability that the observed match is a random event.

Protein scores greater than 55 are significant ( $p < 0.05$ ).

Protein scores are derived from ions scores as a non-probabilistic basis for ranking protein hits.

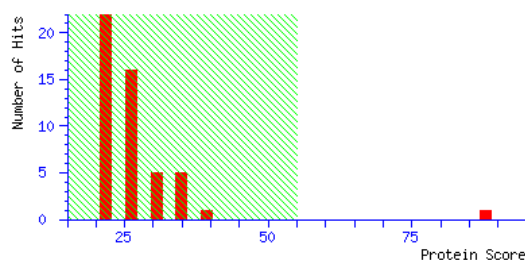

## Protein Summary Report

### Index

|     | Accession                          | Mass   | Score | Description                                                                                                      |
|-----|------------------------------------|--------|-------|------------------------------------------------------------------------------------------------------------------|
| 1.  | <u><a href="#">ALBU_MOUSE</a></u>  | 70700  | 88    | Serum albumin OS=Mus musculus GN=Alb PE=1 SV=3                                                                   |
| 2.  | <u><a href="#">EEA1_MOUSE</a></u>  | 161958 | 38    | Early endosome antigen 1 OS=Mus musculus GN=Eea1 PE=2 SV=2                                                       |
| 3.  | <u><a href="#">FTSJ2_MOUSE</a></u> | 96641  | 34    | S-adenosyl-L-methionine-dependent methyltransferase FTSJD2 OS=Mus musculus GN=Ftsjd2 PE=1 SV=1                   |
| 4.  | <u><a href="#">YPEL4_MOUSE</a></u> | 14762  | 34    | Protein yippee-like 4 OS=Mus musculus GN=Ypel4 PE=2 SV=1                                                         |
| 5.  | <u><a href="#">ACTB_MOUSE</a></u>  | 42052  | 34    | Actin, cytoplasmic 1 OS=Mus musculus GN=Actb PE=1 SV=1                                                           |
| 6.  | <u><a href="#">ACTG_MOUSE</a></u>  | 42108  | 34    | Actin, cytoplasmic 2 OS=Mus musculus GN=Actg1 PE=1 SV=1                                                          |
| 7.  | <u><a href="#">HCN4_MOUSE</a></u>  | 128075 | 33    | Potassium/sodium hyperpolarization-activated cyclic nucleotide-gated channel 4 OS=Mus musculus GN=Hcn4 PE=1 SV=2 |
| 8.  | <u><a href="#">GPX1_MOUSE</a></u>  | 22544  | 32    | Glutathione peroxidase 1 OS=Mus musculus GN=Gpx1 PE=1 SV=2                                                       |
| 9.  | <u><a href="#">AP2A1_MOUSE</a></u> | 108679 | 32    | AP-2 complex subunit alpha-1 OS=Mus musculus GN=Ap2a1 PE=1 SV=1                                                  |
| 10. | <u><a href="#">NB5R4_MOUSE</a></u> | 61113  | 31    | Cytochrome b5 reductase 4 OS=Mus musculus GN=Cyb5r4 PE=2 SV=2                                                    |

### Results List

1. ALBU\_MOUSE Mass: 70700 Score: 88 Expect: 2.6e-005 Matches: 8

Serum albumin OS=Mus musculus GN=Alb PE=1 SV=3

**Observed Mr(expt) Mr(calc) ppm Start End Miss Ions Peptide**

956.5409 955.5336 955.5273 6.63 98 - 105 0 25 K.LCAIPNLR.E  
1149.6040 1148.5967 1148.6077 -9.60 66 - 75 0 --- K.LVQEVTDFAK.T  
1177.6202 1176.6129 1176.5999 11.0 25 - 34 1 --- R.EAHKSEIAHR.Y  
1250.5847 1249.5774 1249.5727 3.76 35 - 44 0 --- R.YNDLGEQHF.K.G  
1714.7979 1713.7906 1713.7893 0.76 118 - 130 1 --- K.QEPERNECFLQHK.D  
1901.9028 1900.8956 1900.8890 3.45 153 - 168 0 --- K.ENPTTFMGHYLHEVAR.R  
1917.8885 1916.8812 1916.8839 -1.40 153 - 168 0 --- K.ENPTTFMGHYLHEVAR.R + Oxidation (M)  
2538.1183 2537.1110 2537.1203 -3.64 131 - 152 0 --- K.DDNPSLPPFERPEAEAMCTSF.K.E

**No match to:** 890.5589, 1016.5220, 1039.5307, 1132.5409, 1171.6085, 1272.5814, 1288.5841, 1481.5916, 1711.9100, 1790.8935, 1862.9356, 1883.9080, 2432.2121

2. EAA1\_MOUSE Mass: 161958 Score: 38 Expect: 2.5 Matches: 8

Early endosome antigen 1 OS=Mus musculus GN=Eaal PE=2 SV=2

**Observed Mr(expt) Mr(calc) ppm Start End Miss Ions Peptide**

956.5409 955.5336 955.5087 26.1 1149 - 1156 1 --- K.SHKQESIK.E  
1016.5220 1015.5148 1015.5549 -39.56 465 - 472 1 --- R.LEEQLKEK.V  
1039.5307 1038.5235 1038.5346 -10.68 725 - 733 0 --- K.VEDELEGH.K  
1171.6085 1170.6012 1170.5993 1.62 819 - 828 1 --- K.LSQDQSKTQHK.E  
1177.6202 1176.6129 1176.6060 5.87 1124 - 1133 1 --- K.SKLAEMEEIK.C  
1883.9080 1882.9007 1882.9860 -45.32 1068 - 1084 1 --- R.NQIGNQNKSIQELQA.AK.A  
1901.9028 1900.8956 1900.9214 -13.57 701 - 715 1 --- K.QEHCIQLESHLKD.HK.E  
1917.8885 1916.8812 1916.9340 -27.54 663 - 679 0 --- R.ADLQNHLDTA.QHALQDK.Q

**No match to:** 890.5589, 1132.5409, 1149.6040, 1250.5847, 1272.5814, 1288.5841, 1481.5916, 1711.9100, 1714.7979, 1790.8935, 1862.9356, 2432.2121, 2538.1183

3. FTSJ2\_MOUSE Mass: 96641 Score: 34 Expect: 5.8 Matches: 6

S-adenosyl-L-methionine-dependent methyltransferase FTSJD2 OS=Mus musculus GN=Ftsjd2 PE=1 SV=1

**Observed Mr(expt) Mr(calc) ppm Start End Miss Ions Peptide**

890.5589 889.5516 889.5306 23.6 718 - 724 1 --- R.LEMKLIK.G + Oxidation (M)  
1250.5847 1249.5774 1249.5397 30.2 83 - 92 0 --- R.YSMYNSVSR.L + Oxidation (M)  
1711.9100 1710.9027 1710.8610 24.4 498 - 512 1 --- R.SNESYCSLQIKALAK.I  
1714.7979 1713.7906 1713.7702 11.9 201 - 214 1 --- K.CKSVFDILDGEEMR.R + Oxidation (M)  
1883.9080 1882.9007 1882.8632 19.9 752 - 767 1 --- R.TVNPEWTMGFSKSNR.K + Oxidation (M)  
2538.1183 2537.1110 2537.1851 -29.22 180 - 200 1 --- R.KMVIETEFCEGELLHSM.LK.C

**No match to:** 956.5409, 1016.5220, 1039.5307, 1132.5409, 1149.6040, 1171.6085, 1177.6202, 1272.5814, 1288.5841, 1481.5916, 1790.8935, 1862.9356, 1901.9028, 1917.8885, 2432.2121

4. YPEL4\_MOUSE Mass: 14762 Score: 34 Expect: 6.5 Matches: 3

Protein yippee-like 4 OS=Mus musculus GN=Ypel4 PE=2 SV=1

**Observed Mr(expt) Mr(calc) ppm Start End Miss Ions Peptide**

1039.5307 1038.5235 1038.5611 -36.18 17 - 24 1 --- K.TFRSYLPR.C  
 1250.5847 1249.5774 1249.6199 -33.96 113 - 122 0 --- K.YIEMSHMVK.D  
 1714.7979 1713.7906 1713.7525 22.2 1 - 16 0 --- -.MPSCDPGAPACLPTK.T + Oxidation (M)  
**No match to:** 890.5589, 956.5409, 1016.5220, 1132.5409, 1149.6040, 1171.6085, 1177.6202, 1272.5814, 1288.5841, 1481.5916, 1711.9100, 1790.8935, 1862.9356, 1883.9080, 1901.9028, 1917.8885, 2432.2121, 2538.1183

5. ACTB\_MOUSE Mass: 42052 Score: 34 Expect: 7.1 Matches: 4

Actin, cytoplasmic 1 OS=Mus musculus GN=Actb PE=1 SV=1

**Observed Mr(expt) Mr(calc) ppm Start End Miss Ions Peptide**

1132.5409 1131.5337 1131.5197 12.4 197 - 206 0 --- R.GYSFTTAER.E  
 1171.6085 1170.6012 1170.5638 31.9 40 - 50 0 --- R.HQGVVMVGMGQK.D  
 1177.6202 1176.6129 1176.6060 5.85 316 - 326 0 --- K.EITALAPSTMK.I + Oxidation (M)  
 1790.8935 1789.8862 1789.8846 0.90 239 - 254 0 --- K.SYELPDGQVITIGNER.F

**No match to:** 890.5589, 956.5409, 1016.5220, 1039.5307, 1149.6040, 1250.5847, 1272.5814, 1288.5841, 1481.5916, 1711.9100, 1714.7979, 1862.9356, 1883.9080, 1901.9028, 1917.8885, 2432.2121, 2538.1183

6. ACTG\_MOUSE Mass: 42108 Score: 34 Expect: 7.1 Matches: 4

Actin, cytoplasmic 2 OS=Mus musculus GN=Actg1 PE=1 SV=1

**Observed Mr(expt) Mr(calc) ppm Start End Miss Ions Peptide**

1132.5409 1131.5337 1131.5197 12.4 197 - 206 0 --- R.GYSFTTAER.E  
 1171.6085 1170.6012 1170.5638 31.9 40 - 50 0 --- R.HQGVVMVGMGQK.D  
 1177.6202 1176.6129 1176.6060 5.85 316 - 326 0 --- K.EITALAPSTMK.I + Oxidation (M)  
 1790.8935 1789.8862 1789.8846 0.90 239 - 254 0 --- K.SYELPDGQVITIGNER.F

**No match to:** 890.5589, 956.5409, 1016.5220, 1039.5307, 1149.6040, 1250.5847, 1272.5814, 1288.5841, 1481.5916, 1711.9100, 1714.7979, 1862.9356, 1883.9080, 1901.9028, 1917.8885, 2432.2121, 2538.1183

7. HCN4\_MOUSE Mass: 128075 Score: 33 Expect: 8.5 Matches: 6

Potassium/sodium hyperpolarization-activated cyclic nucleotide-gated channel 4 OS=Mus musculus GN=Hcn4 PE=1 SV=2

**Observed Mr(expt) Mr(calc) ppm Start End Miss Ions Peptide**

1016.5220 1015.5148 1015.5046 9.96 239 - 246 1 --- K.AVEREQER.V  
 1039.5307 1038.5235 1038.4917 30.6 208 - 216 0 --- R.LGQSGFMQR.Q + Oxidation (M)  
 1132.5409 1131.5337 1131.5097 21.2 551 - 558 0 --- R.IHDYYEHR.Y  
 1272.5814 1271.5741 1271.6106 -28.66 69 - 82 0 --- R.GAALGATESEGPGR.S  
 1714.7979 1713.7906 1713.8396 -28.60 652 - 666 0 --- R.LADGSYFGEICLLTR.G  
 1862.9356 1861.9283 1861.8959 17.4 1089 - 1106 0 --- R.ASPHSSGESVAAFSLYPR.A

**No match to:** 890.5589, 956.5409, 1149.6040, 1171.6085, 1177.6202, 1250.5847, 1288.5841, 1481.5916, 1711.9100, 1790.8935, 1883.9080, 1901.9028, 1917.8885, 2432.2121, 2538.1183

8. GPX1\_MOUSE Mass: 22544 Score: 32 Expect: 9.8 Matches: 3

Glutathione peroxidase 1 OS=Mus musculus GN=Gpx1 PE=1 SV=2

**Observed Mr(expt) Mr(calc) ppm Start End Miss Ions Peptide**

1272.5814 1271.5741 1271.5340 31.6 53 - 62 0 --- R.DYTEMNDLQK.R + Oxidation (M)  
 1883.9080 1882.9007 1882.8982 1.31 129 - 146 0 --- R.NALPTPSDDPTALMTDPK.Y

1917.8885 1916.8812 1916.9567 -39.36 113 - 128 1 --- K.CEVNGEKAHPLFTFLR.N

**No match to:** 890.5589, 956.5409, 1016.5220, 1039.5307, 1132.5409, 1149.6040, 1171.6085, 1177.6202, 1250.5847, 1288.5841, 1481.5916, 1711.9100, 1714.7979, 1790.8935, 1862.9356, 1901.9028, 2432.2121, 2538.1183

**9. AP2A1\_MOUSE Mass: 108679 Score: 32 Expect: 10 Matches: 5**

AP-2 complex subunit alpha-1 OS=Mus musculus GN=Ap2a1 PE=1 SV=1

**Observed Mr(expt) Mr(calc) ppm Start End Miss Ions Peptide**

1250.5847 1249.5774 1249.6224 -35.99 154 - 165 0 --- R.ILVAGDSMDSVK.Q + Oxidation (M)

1272.5814 1271.5741 1271.6218 -37.49 621 - 633 1 --- K.GPGAASALDLSRR.D

1714.7979 1713.7906 1713.7814 5.36 389 - 403 1 --- R.AADLLYAMCDRSNAK.Q + Oxidation (M)

1862.9356 1861.9283 1861.8458 44.3 864 - 878 0 --- K.FFQPTEMAAQDFQ.R.W

2538.1183 2537.1110 2537.2142 -40.65 142 - 165 1 --- R.EMGEAFAADIPRILVAGDSMDSVK.Q + Oxidation (M)

**No match to:** 890.5589, 956.5409, 1016.5220, 1039.5307, 1132.5409, 1149.6040, 1171.6085, 1177.6202, 1288.5841, 1481.5916, 1711.9100, 1790.8935, 1883.9080, 1901.9028, 1917.8885, 2432.2121

**10. NB5R4\_MOUSE Mass: 61113 Score: 31 Expect: 12 Matches: 4**

Cytochrome b5 reductase 4 OS=Mus musculus GN=Cyb5r4 PE=2 SV=2

**Observed Mr(expt) Mr(calc) ppm Start End Miss Ions Peptide**

956.5409 955.5336 955.5525 -19.70 129 - 137 0 --- R.MAVKPAVPK.D + Oxidation (M)

1883.9080 1882.9007 1882.9070 -3.32 114 - 128 1 --- R.WVNYESMLKECLVGR.M

1901.9028 1900.8956 1900.9742 -41.36 204 - 220 0 --- K.NISLDSVIVDLQDDSLR.A

2432.2121 2431.2048 2431.3191 -47.01 362 - 381 1 --- K.YIYFLIKIYPAGLFTPELDR.L

**No match to:** 890.5589, 1016.5220, 1039.5307, 1132.5409, 1149.6040, 1171.6085, 1177.6202, 1250.5847, 1272.5814, 1288.5841, 1481.5916, 1711.9100, 1714.7979, 1790.8935, 1862.9356, 1917.8885, 2538.1183

**Search Parameters**

**Type of search** : MS/MS Ion Search

**Enzyme** : Trypsin

**Fixed modifications** : Carbamidomethyl (C)

**Variable modifications** : Oxidation (M)

**Mass values** : Monoisotopic

**Protein Mass** : Unrestricted

**Peptide Mass Tolerance** :  $\pm 50$  ppm

**Fragment Mass Tolerance**:  $\pm 0.6$  Da

**Max Missed Cleavages** : 1

**Instrument type** : MALDI-TOF-TOF

**Query1 (890.5589,1+)** : <no title>

**Query2 (956.5409,1+)** : <no title>

**Query3 (1016.5220,1+)** : <no title>

**Query4 (1039.5307,1+)** : <no title>

**Query5 (1132.5409,1+)** : <no title>

**Query6 (1149.6040,1+)** : <no title>

**Query7 (1171.6085,1+)** : <no title>



Query8 (1177.6202,1+) : <no title>

Query9 (1250.5847,1+) : <no title>

Query10 (1272.5814,1+) : <no title>

Query11 (1288.5841,1+) : <no title>

Query12 (1481.5916,1+) : <no title>

Query13 (1711.9100,1+) : <no title>

Query14 (1714.7979,1+) : <no title>

Query15 (1790.8935,1+) : <no title>

Query16 (1862.9356,1+) : <no title>

Query17 (1883.9080,1+) : <no title>

Query18 (1901.9028,1+) : <no title>

Query19 (1917.8885,1+) : <no title>

Query20 (2432.2121,1+) : <no title>

Query21 (2538.1183,1+) : <no title>

**Mascot:** <http://www.matrixscience.com/>

# MASCOT Search Results

**User** :  
**Email** :  
**Search title** : Auto submitted by BioTools  
**Database** : SwissProt 57.15 (515203 sequences; 181334896 residues)  
**Taxonomy** : Mus musculus (house mouse) (16230 sequences)  
**Timestamp** : 5 Nov 2013 at 04:45:23 GMT  
**Warning** : A Peptide summary report will usually give a much clearer picture of MS/MS search results.  
**Top Score** : 97 for IPYR\_MOUSE, Inorganic pyrophosphatase OS=Mus musculus GN=Ppa1 PE=1 SV=1

## Mascot Score Histogram

Protein score is  $-10 \cdot \log(P)$ , where P is the probability that the observed match is a random event.

Protein scores greater than 55 are significant ( $p < 0.05$ ).

Protein scores are derived from ions scores as a non-probabilistic basis for ranking protein hits.

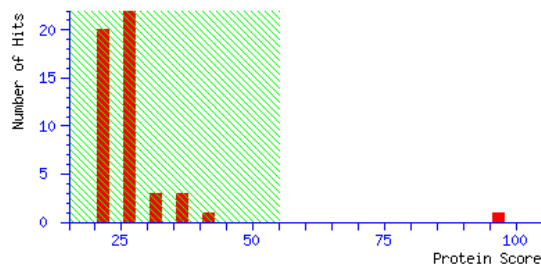

## Protein Summary Report

### Index

| Accession                       | Mass   | Score | Description                                                                       |
|---------------------------------|--------|-------|-----------------------------------------------------------------------------------|
| 1. <a href="#">IPYR_MOUSE</a>   | 33102  | 97    | Inorganic pyrophosphatase OS=Mus musculus GN=Ppa1 PE=1 SV=1                       |
| 2. <a href="#">CF012_MOUSE</a>  | 25530  | 43    | Uncharacterized protein C6orf12 homolog OS=Mus musculus GN=Tctex4 PE=2 SV=2       |
| 3. <a href="#">ENOA_MOUSE</a>   | 47453  | 37    | Alpha-enolase OS=Mus musculus GN=Eno1 PE=1 SV=3                                   |
| 4. <a href="#">SMG9_MOUSE</a>   | 57812  | 35    | Protein SMG9 OS=Mus musculus GN=Smg9 PE=2 SV=1                                    |
| 5. <a href="#">JARID2_MOUSE</a> | 139013 | 35    | Protein Jumonji OS=Mus musculus GN=Jarid2 PE=1 SV=1                               |
| 6. <a href="#">KIF5A_MOUSE</a>  | 117745 | 32    | Kinesin heavy chain isoform 5A OS=Mus musculus GN=Kif5a PE=1 SV=3                 |
| 7. <a href="#">GABT_MOUSE</a>   | 57100  | 30    | 4-aminobutyrate aminotransferase, mitochondrial OS=Mus musculus GN=Abat PE=1 SV=1 |
| 8. <a href="#">CF057_MOUSE</a>  | 11938  | 30    | UPF0369 protein C6orf57 homolog OS=Mus musculus PE=2 SV=2                         |
| 9. <a href="#">YK014_MOUSE</a>  | 14828  | 28    | CD225 family protein FLJ76511 homolog OS=Mus musculus PE=2 SV=2                   |
| 10. <a href="#">NDUC2_MOUSE</a> | 14211  | 28    | NADH dehydrogenase [ubiquinone] 1 subunit C2 OS=Mus musculus GN=Nduf2 PE=1 SV=1   |

## Results List

1. [IPYR\\_MOUSE](#) Mass: 33102 Score: 97 Expect: 3.5e-006 Matches: 2

Inorganic pyrophosphatase OS=Mus musculus GN=Ppal PE=1 SV=1

**Observed Mr(expt) Mr(calc) ppm Start End Miss Ions Peptide**

2230.1284 2229.1211 2229.0742 21.0 193 - 211 1 --- R.YKVPDGKPENEFANAEFK.N  
2432.2518 2431.2445 2431.1867 23.8 156 - 177 1 71 K.VIAINVDDPDAANYKDISDVER.L

**No match to:** 1136.6212, 1251.6695, 1726.9363, 1805.0037, 1960.9755, 2252.1376, 2268.1269

2. CF012\_MOUSE Mass: 25530 Score: 43 Expect: 0.76 Matches: 3

Uncharacterized protein C6orf12 homolog OS=Mus musculus GN=Tctex4 PE=2 SV=2

**Observed Mr(expt) Mr(calc) ppm Start End Miss Ions Peptide**

1251.6695 1250.6622 1250.6983 -28.84 133 - 143 1 --- K.SPSQIPLPEKR.D  
1805.0037 1803.9964 1803.9155 44.8 17 - 33 0 --- K.VQEPPSPSPPPPPPR.R  
1960.9755 1959.9682 1960.0166 -24.70 17 - 34 1 --- K.VQEPPSPSPPPPPRR.E

**No match to:** 1136.6212, 1726.9363, 2230.1284, 2252.1376, 2268.1269, 2432.2518

3. ENOA\_MOUSE Mass: 47453 Score: 37 Expect: 3.4 Matches: 3

Alpha-enolase OS=Mus musculus GN=Eno1 PE=1 SV=3

**Observed Mr(expt) Mr(calc) ppm Start End Miss Ions Peptide**

1805.0037 1803.9964 1803.9366 33.1 33 - 50 0 --- R.AAVPSGASTGIYEALRLR.D  
1960.9755 1959.9682 1959.9174 25.9 203 - 221 0 --- K.DATNVGDEGGFAPNILENK.E  
2432.2518 2431.2445 2431.1698 30.7 163 - 183 1 --- K.LAMQEFMILPVGASSFREAMR.I + 3 Oxidation (M)

**No match to:** 1136.6212, 1251.6695, 1726.9363, 2230.1284, 2252.1376, 2268.1269

4. SMG9\_MOUSE Mass: 57812 Score: 35 Expect: 5.3 Matches: 4

Protein SMG9 OS=Mus musculus GN=Smg9 PE=2 SV=1

**Observed Mr(expt) Mr(calc) ppm Start End Miss Ions Peptide**

1960.9755 1959.9682 1959.9593 4.54 386 - 401 0 --- R.QMHLMIDQLMAHSHLR.Y  
2230.1284 2229.1211 2229.1445 -10.50 384 - 401 1 --- K.LRQMHLMIDQLMAHSHLR.Y  
2252.1376 2251.1303 2251.1176 5.65 386 - 403 1 --- R.QMHLMIDQLMAHSHLRYK.G  
2268.1269 2267.1197 2267.1125 3.15 386 - 403 1 --- R.QMHLMIDQLMAHSHLRYK.G + Oxidation (M)

**No match to:** 1136.6212, 1251.6695, 1726.9363, 1805.0037, 2432.2518

5. JARD2\_MOUSE Mass: 139013 Score: 35 Expect: 5.6 Matches: 5

Protein Jumonji OS=Mus musculus GN=Jarid2 PE=1 SV=1

**Observed Mr(expt) Mr(calc) ppm Start End Miss Ions Peptide**

1251.6695 1250.6622 1250.6289 26.7 312 - 324 1 --- R.MSSLGAGTNSAKK.I  
1805.0037 1803.9964 1803.9223 41.1 659 - 674 1 --- R.LINEMGGMQQVTDLKK.W  
2252.1376 2251.1303 2251.0878 18.9 587 - 604 1 --- R.VIPPPDWRPECKLNDEMRF  
2268.1269 2267.1197 2267.0827 16.3 587 - 604 1 --- R.VIPPPDWRPECKLNDEMRF + Oxidation (M)  
2432.2518 2431.2445 2431.2933 -20.06 1049 - 1069 1 --- R.HIAKPFMEKLLYQIAQAEAK.K + Oxidation (M)

**No match to:** 1136.6212, 1726.9363, 1960.9755, 2230.1284

6. KIF5A\_MOUSE Mass: 117745 Score: 32 Expect: 11 Matches: 4

Kinesin heavy chain isoform 5A OS=Mus musculus GN=Ki5a PE=1 SV=3

| Observed  | Mr(expt)  | Mr(calc)  | ppm    | Start | End   | Miss | Ions | Peptide                                   |
|-----------|-----------|-----------|--------|-------|-------|------|------|-------------------------------------------|
| 1251.6695 | 1250.6622 | 1250.7095 | -37.82 | 790   | - 799 | 1    | --   | R.ELQTLHNLRK.L                            |
| 1726.9363 | 1725.9290 | 1725.8971 | 18.5   | 640   | - 653 | 1    | --   | K.IRSITEYMQTVELK.K + Oxidation (M)        |
| 1805.0037 | 1803.9964 | 1803.9730 | 13.0   | 828   | - 842 | 1    | --   | K.QKISFLENNLEQLTK.V                       |
| 2432.2518 | 2431.2445 | 2431.1835 | 25.1   | 619   | - 639 | 1    | --   | K.MEVTGRELSSCQLLISQHEAK.I + Oxidation (M) |

**No match to:** 1136.6212, 1960.9755, 2230.1284, 2252.1376, 2268.1269

**7. GABT\_MOUSE Mass: 57100 Score: 30 Expect: 14 Matches: 3**

4-aminobutyrate aminotransferase, mitochondrial OS=Mus musculus GN=Abat PE=1 SV=1

| Observed  | Mr(expt)  | Mr(calc)  | ppm    | Start | End   | Miss | Ions | Peptide                      |
|-----------|-----------|-----------|--------|-------|-------|------|------|------------------------------|
| 1136.6212 | 1135.6139 | 1135.6536 | -34.88 | 1     | - 9   | 1    | --   | -.MAFLITRR.L + Oxidation (M) |
| 1251.6695 | 1250.6622 | 1250.6044 | 46.2   | 368   | - 377 | 0    | --   | K.EEFRPSAPYR.I               |
| 2432.2518 | 2431.2445 | 2431.3587 | -46.97 | 414   | - 434 | 1    | --   | K.TLLTGLLDLQAQYPQFISVRV.G    |

**No match to:** 1726.9363, 1805.0037, 1960.9755, 2230.1284, 2252.1376, 2268.1269

**8. CF057\_MOUSE Mass: 11938 Score: 30 Expect: 15 Matches: 2**

UPF0369 protein C6orf57 homolog OS=Mus musculus PE=2 SV=2

| Observed  | Mr(expt)  | Mr(calc)  | ppm  | Start | End  | Miss | Ions | Peptide              |
|-----------|-----------|-----------|------|-------|------|------|------|----------------------|
| 1726.9363 | 1725.9290 | 1725.8938 | 20.4 | 65    | - 79 | 1    | --   | R.EPLQKFPDDVNPVTK.E  |
| 1805.0037 | 1803.9964 | 1803.9189 | 43.0 | 30    | - 45 | 1    | --   | K.MSYQEGKPEPAKQALK.K |

**No match to:** 1136.6212, 1251.6695, 1960.9755, 2230.1284, 2252.1376, 2268.1269, 2432.2518

**9. YK014\_MOUSE Mass: 14828 Score: 28 Expect: 23 Matches: 2**

CD225 family protein FLJ76511 homolog OS=Mus musculus PE=2 SV=2

| Observed  | Mr(expt)  | Mr(calc)  | ppm  | Start | End  | Miss | Ions | Peptide                        |
|-----------|-----------|-----------|------|-------|------|------|------|--------------------------------|
| 1136.6212 | 1135.6139 | 1135.5583 | 49.0 | 2     | - 11 | 0    | --   | M.APTLFPMESK.S + Oxidation (M) |
| 1251.6695 | 1250.6622 | 1250.6039 | 46.6 | 1     | - 11 | 0    | --   | -.MAPTLFPMESK.S                |

**No match to:** 1726.9363, 1805.0037, 1960.9755, 2230.1284, 2252.1376, 2268.1269, 2432.2518

**10. NDUC2\_MOUSE Mass: 14211 Score: 28 Expect: 26 Matches: 3**

NADH dehydrogenase [ubiquinone] 1 subunit C2 OS=Mus musculus GN=Nduf2 PE=1 SV=1

| Observed  | Mr(expt)  | Mr(calc)  | ppm  | Start | End  | Miss | Ions | Peptide                                   |
|-----------|-----------|-----------|------|-------|------|------|------|-------------------------------------------|
| 1251.6695 | 1250.6622 | 1250.6190 | 34.6 | 2     | - 12 | 0    | --   | M.MNGRPGHEPLK.F + Oxidation (M)           |
| 2252.1376 | 2251.1303 | 2251.0509 | 35.3 | 31    | - 49 | 0    | --   | R.LVYMGLLGYCTGLMDNMLR.M + 2 Oxidation (M) |
| 2268.1269 | 2267.1197 | 2267.0459 | 32.6 | 31    | - 49 | 0    | --   | R.LVYMGLLGYCTGLMDNMLR.M + 3 Oxidation (M) |

**No match to:** 1136.6212, 1726.9363, 1805.0037, 1960.9755, 2230.1284, 2432.2518

**Search Parameters**

Type of search : MS/MS Ion Search  
 Enzyme : Trypsin  
 Fixed modifications : Carbamidomethyl (C)  
 Variable modifications : Oxidation (M)

**Mass values** : Monoisotopic  
**Protein Mass** : Unrestricted  
**Peptide Mass Tolerance** :  $\pm 50$  ppm  
**Fragment Mass Tolerance**:  $\pm 0.6$  Da  
**Max Missed Cleavages** : 1  
**Instrument type** : MALDI-TOF-TOF  
**Query1 (1136.6212,1+)** : <no title>  
**Query2 (1251.6695,1+)** : <no title>  
**Query3 (1726.9363,1+)** : <no title>  
**Query4 (1805.0037,1+)** : <no title>  
**Query5 (1960.9755,1+)** : <no title>  
**Query6 (2230.1284,1+)** : <no title>  
**Query7 (2252.1376,1+)** : <no title>  
**Query8 (2268.1269,1+)** : <no title>  
**Query9 (2432.2518,1+)** : <no title>

**Mascot:** <http://www.matrixscience.com/>

# **MASCOT** Mascot Search Results **SCIENCE**

User :  
Email :  
Search title : Auto submitted by BioTools  
Database : SwissProt 57.15 (515203 sequences; 181334896 residues)  
Taxonomy : Mus musculus (house mouse) (16230 sequences)  
Timestamp : 5 Nov 2013 at 04:45:14 GMT  
Warning : A Peptide summary report will usually give a much clearer picture of MS/MS search results.  
Top Score : 263 for K1C19\_MOUSE, Keratin, type I cytoskeletal 19 OS=Mus musculus GN=Krt19 PE=2 SV=1

## Mascot Score Histogram

Protein score is  $-10 \cdot \log(P)$ , where P is the probability that the observed match is a random event.

Protein scores greater than 55 are significant ( $p < 0.05$ ).

Protein scores are derived from ions scores as a non-probabilistic basis for ranking protein hits.

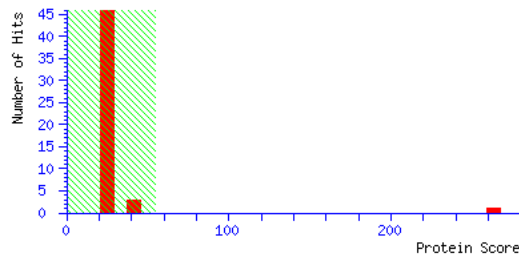

## Protein Summary Report

### Index

| Accession                      | Mass  | Score | Description                                                                         |
|--------------------------------|-------|-------|-------------------------------------------------------------------------------------|
| 1. <a href="#">K1C19_MOUSE</a> | 44515 | 263   | Keratin, type I cytoskeletal 19 OS=Mus musculus GN=Krt19 PE=2 SV=1                  |
| 2. <a href="#">CDT1_MOUSE</a>  | 62098 | 40    | DNA replication factor Cdt1 OS=Mus musculus GN=Cdt1 PE=1 SV=1                       |
| 3. <a href="#">JPH1_MOUSE</a>  | 72374 | 35    | Junctophilin-1 OS=Mus musculus GN=Jph1 PE=1 SV=1                                    |
| 4. <a href="#">AAKG2_MOUSE</a> | 63129 | 34    | 5'-AMP-activated protein kinase subunit gamma-2 OS=Mus musculus GN=Prkag2 PE=1 SV=1 |
| 5. <a href="#">K1C18_MOUSE</a> | 47509 | 33    | Keratin, type I cytoskeletal 18 OS=Mus musculus GN=Krt18 PE=1 SV=5                  |
| 6. <a href="#">SCG1_MOUSE</a>  | 78036 | 32    | Secretogranin-1 OS=Mus musculus GN=Chgb PE=1 SV=2                                   |
| 7. <a href="#">HYLS1_MOUSE</a> | 35461 | 32    | Hydrolethalus syndrome protein 1 homolog OS=Mus musculus GN=Hyls1 PE=2 SV=2         |
| 8. <a href="#">SYRM_MOUSE</a>  | 65865 | 32    | Probable arginyl-tRNA synthetase, mitochondrial OS=Mus musculus GN=Rars2 PE=2 SV=1  |
| 9. <a href="#">HXB2_MOUSE</a>  | 38528 | 32    | Homeobox protein Hox-B2 OS=Mus musculus GN=Hoxb2 PE=2 SV=1                          |
| 10. <a href="#">HXA2_MOUSE</a> | 41167 | 31    | Homeobox protein Hox-A2 OS=Mus musculus GN=Hoxa2 PE=2 SV=1                          |

### Results List

1. [K1C19\\_MOUSE](#) Mass: 44515 Score: 263 Expect: 8.1e-023 Matches: 18

Keratin, type I cytoskeletal 19 OS=Mus musculus GN=Krt19 PE=2 SV=1

| Observed  | Mr(expt)  | Mr(calc)  | ppm    | Start | End | Miss | Ions | Peptide                                |
|-----------|-----------|-----------|--------|-------|-----|------|------|----------------------------------------|
| 986.4348  | 985.4275  | 985.4294  | -1.91  | 129   | 135 | 0    | ---  | R.DYNHYFK.T                            |
| 989.5228  | 988.5155  | 988.5189  | -3.42  | 136   | 143 | 1    | ---  | K.TIEDLRDK.I                           |
| 995.4967  | 994.4894  | 994.4944  | -5.03  | 33    | 43  | 0    | ---  | R.APSIHGGSGGR.G                        |
| 1002.4741 | 1001.4669 | 1001.4930 | -26.14 | 172   | 179 | 0    | ---  | K.FETEHALR.L                           |
| 1008.5157 | 1007.5085 | 1007.5188 | -10.31 | 115   | 121 | 1    | ---  | K.IRDWYQK.Q                            |
| 1029.5837 | 1028.5765 | 1028.5866 | -9.86  | 192   | 200 | 0    | ---  | R.VLDELTART                            |
| 1041.6120 | 1040.6047 | 1040.5978 | 6.61   | 154   | 162 | 0    | 24   | K.IVLQIDNAR.L                          |
| 1064.5983 | 1063.5910 | 1063.6026 | -10.87 | 94    | 102 | 1    | ---  | R.LASYLDKVR.A                          |
| 1104.5414 | 1103.5342 | 1103.5393 | -4.68  | 85    | 93  | 0    | ---  | K.ITMQNLNDR.L                          |
| 1120.5442 | 1119.5370 | 1119.5342 | 2.44   | 85    | 93  | 0    | ---  | K.ITMQNLNDR.L + Oxidation (M)          |
| 1186.6330 | 1185.6257 | 1185.6353 | -8.12  | 180   | 190 | 0    | ---  | R.LSVEADINGLR.R                        |
| 1211.5967 | 1210.5894 | 1210.5942 | -3.93  | 220   | 229 | 0    | ---  | K.NHEEEITALR.S                         |
| 1231.6372 | 1230.6299 | 1230.6357 | -4.67  | 170   | 179 | 1    | ---  | R.TKFETEHALR.L                         |
| 1303.6208 | 1302.6136 | 1302.6205 | -5.29  | 52    | 64  | 0    | 34   | R.FVTSSSGSYGGVR.G                      |
| 1342.7366 | 1341.7293 | 1341.7364 | -5.32  | 180   | 191 | 1    | 43   | R.LSVEADINGLRR.V                       |
| 1586.7055 | 1585.6982 | 1585.7155 | -10.93 | 8     | 24  | 0    | ---  | R.QTSAMSSFSGGTGGGSVR.I                 |
| 1602.7088 | 1601.7016 | 1601.7104 | -5.53  | 8     | 24  | 0    | ---  | R.QTSAMSSFSGGTGGGSVR.I + Oxidation (M) |
| 1895.9084 | 1894.9011 | 1894.9272 | -13.77 | 65    | 84  | 0    | ---  | R.GGSFSGTLAVSDGLLSGNEK.I               |

**No match to:** 1012.5478, 1016.5231, 1022.5053, 1024.4837, 1040.5397, 1056.5252, 1068.5327, 1200.6600, 1223.6135, 1225.5963, 1245.6477, 1265.6787, 1328.1044, 1506.7227, 1547.8170, 1569.6870, 1726.8702, 1782.8947, 1917.9002, 1932.8979, 2002.0042, 2297.1880

2. CDT1\_MOUSE Mass: 62098 Score: 40 Expect: 1.8 Matches: 5

DNA replication factor Cdt1 OS=Mus musculus GN=Cdt1 PE=1 SV=1

| Observed  | Mr(expt)  | Mr(calc)  | ppm    | Start | End | Miss | Ions | Peptide                       |
|-----------|-----------|-----------|--------|-------|-----|------|------|-------------------------------|
| 1064.5983 | 1063.5910 | 1063.5406 | 47.4   | 381   | 389 | 1    | ---  | R.SLMTPKMEK.A                 |
| 1186.6330 | 1185.6257 | 1185.5700 | 47.0   | 170   | 179 | 0    | ---  | K.VPTEQPCVEK.A                |
| 1200.6600 | 1199.6527 | 1199.6009 | 43.2   | 203   | 211 | 0    | ---  | K.YQVLVEMFR.S + Oxidation (M) |
| 1245.6477 | 1244.6404 | 1244.6910 | -40.69 | 387   | 397 | 1    | ---  | K.MEKALSNLALR.S               |
| 1342.7366 | 1341.7293 | 1341.7616 | -24.08 | 535   | 547 | 1    | 23   | K.LDKAVDLAGLTAR.L             |

**No match to:** 986.4348, 989.5228, 995.4967, 1002.4741, 1008.5157, 1012.5478, 1016.5231, 1022.5053, 1024.4837, 1029.5837, 1040.5397, 1041.6120, 1056.5252, 1068.5327, 1104.5414, 1120.5442, 1211.5967, 1223.6135, 1225.5963, 1231.6372, 1265.6787, 1303.6208, 1328.1044, 1506.7227, 1547.8170, 1569.6870, 1586.7055, 1602.7088, 1726.8702, 1782.8947, 1895.9084, 1917.9002, 1932.8979, 2002.0042, 2297.1880

3. JPH1\_MOUSE Mass: 72374 Score: 35 Expect: 4.9 Matches: 4

Junctophilin-1 OS=Mus musculus GN=Jph1 PE=1 SV=1

| Observed  | Mr(expt)  | Mr(calc)  | ppm    | Start | End | Miss | Ions | Peptide                    |
|-----------|-----------|-----------|--------|-------|-----|------|------|----------------------------|
| 1200.6600 | 1199.6527 | 1199.6986 | -38.25 | 157   | 167 | 1    | ---  | R.SPLRTSLASLR.S            |
| 1303.6208 | 1302.6136 | 1302.6317 | -13.89 | 556   | 566 | 0    | ---  | K.LNTPQHPPEDR.E            |
| 1342.7366 | 1341.7293 | 1341.7000 | 21.8   | 386   | 399 | 1    | 16   | R.AKADAADQAALAAR.Q         |
| 2297.1880 | 2296.1807 | 2296.0679 | 49.1   | 168   | 191 | 0    | ---  | R.SEQSNGLVHEAAAAADSPAGTR.G |

**No match to:** 986.4348, 989.5228, 995.4967, 1002.4741, 1008.5157, 1012.5478, 1016.5231, 1022.5053, 1024.4837, 1029.5837, 1040.5397,

1041.6120, 1056.5252, 1064.5983, 1068.5327, 1104.5414, 1120.5442, 1186.6330, 1211.5967, 1223.6135, 1225.5963, 1231.6372, 1245.6477, 1265.6787, 1328.1044, 1506.7227, 1547.8170, 1569.6870, 1586.7055, 1602.7088, 1726.8702, 1782.8947, 1895.9084, 1917.9002, 1932.8979, 2002.0042

4. AAKG2\_MOUSE Mass: 63129 Score: 34 Expect: 5.8 Matches: 6

5'-AMP-activated protein kinase subunit gamma-2 OS=Mus musculus GN=Prkag2 PE=1 SV=1

**Observed Mr(expt) Mr(calc) ppm Start End Miss Ions Peptide**

1029.5837 1028.5765 1028.5654 10.7 300 - 308 1 --- R.AAPLWESKK.Q  
1056.5252 1055.5180 1055.5288 -10.24 499 - 507 0 --- R.SQYFEGVVK.C  
1245.6477 1244.6404 1244.6190 17.2 172 - 181 0 --- K.QHPFPLESYK.Q  
1586.7055 1585.6982 1585.7332 -22.10 133 - 148 0 --- K.ESSPNSNPSTSPGGIR.F  
1602.7088 1601.7016 1601.7759 -46.42 330 - 342 0 --- K.SPMVQIYELEHK.I  
1782.8947 1781.8874 1781.8697 9.97 63 - 79 1 --- K.VDSPFSSGSPSRGLFSR.G

**No match to:** 986.4348, 989.5228, 995.4967, 1002.4741, 1008.5157, 1012.5478, 1016.5231, 1022.5053, 1024.4837, 1040.5397, 1041.6120, 1064.5983, 1068.5327, 1104.5414, 1120.5442, 1186.6330, 1200.6600, 1211.5967, 1223.6135, 1225.5963, 1231.6372, 1265.6787, 1303.6208, 1328.1044, 1342.7366, 1506.7227, 1547.8170, 1569.6870, 1726.8702, 1895.9084, 1917.9002, 1932.8979, 2002.0042, 2297.1880

5. K1C18\_MOUSE Mass: 47509 Score: 33 Expect: 8.5 Matches: 2

Keratin, type I cytoskeletal 18 OS=Mus musculus GN=Krt18 PE=1 SV=5

**Observed Mr(expt) Mr(calc) ppm Start End Miss Ions Peptide**

1041.6120 1040.6047 1040.5978 6.61 143 - 151 0 24 R.IVLQIDNAR.L  
1506.7227 1505.7154 1505.7647 -32.74 295 - 307 0 --- R.TLQTLEIDLDSMK.N

**No match to:** 986.4348, 989.5228, 995.4967, 1002.4741, 1008.5157, 1012.5478, 1016.5231, 1022.5053, 1024.4837, 1029.5837, 1040.5397, 1056.5252, 1064.5983, 1068.5327, 1104.5414, 1120.5442, 1186.6330, 1200.6600, 1211.5967, 1223.6135, 1225.5963, 1231.6372, 1245.6477, 1265.6787, 1303.6208, 1328.1044, 1342.7366, 1547.8170, 1569.6870, 1586.7055, 1602.7088, 1726.8702, 1782.8947, 1895.9084, 1917.9002, 1932.8979, 2002.0042, 2297.1880

6. SCG1\_MOUSE Mass: 78036 Score: 32 Expect: 9.1 Matches: 7

Secretogranin-1 OS=Mus musculus GN=Chgb PE=1 SV=2

**Observed Mr(expt) Mr(calc) ppm Start End Miss Ions Peptide**

986.4348 985.4275 985.4366 -9.25 122 - 130 0 --- K.WTEGGGHSR.E  
1002.4741 1001.4669 1001.4753 -8.40 170 - 177 0 --- K.IYPMGEHR.E  
1016.5231 1015.5158 1015.5298 -13.76 448 - 456 1 --- R.ESPIDAKR.Y  
1245.6477 1244.6404 1244.6877 -38.01 588 - 598 1 --- R.SFARAPQLDLK.R  
1782.8947 1781.8874 1781.8624 14.0 499 - 512 1 --- R.FPDRQYEPYPITEK.R  
1917.9002 1916.8929 1916.8024 47.2 341 - 356 1 --- R.ASEEEPEYGEESRSYR.G  
1932.8979 1931.8906 1931.8530 19.4 210 - 226 1 --- K.DESVARADAHSMELEEK.T + Oxidation (M)

**No match to:** 989.5228, 995.4967, 1008.5157, 1012.5478, 1022.5053, 1024.4837, 1029.5837, 1040.5397, 1041.6120, 1056.5252, 1064.5983, 1068.5327, 1104.5414, 1120.5442, 1186.6330, 1200.6600, 1211.5967, 1223.6135, 1225.5963, 1231.6372, 1265.6787, 1303.6208, 1328.1044, 1342.7366, 1506.7227, 1547.8170, 1569.6870, 1586.7055, 1602.7088, 1726.8702, 1895.9084, 2002.0042, 2297.1880

7. HYLS1\_MOUSE Mass: 35461 Score: 32 Expect: 9.8 Matches: 6

Hydrolethalus syndrome protein 1 homolog OS=Mus musculus GN=Hyls1 PE=2 SV=2



| Observed  | Mr(expt)  | Mr(calc)  | ppm    | Start | End | Miss | Ions | Peptide                            |
|-----------|-----------|-----------|--------|-------|-----|------|------|------------------------------------|
| 1068.5327 | 1067.5254 | 1067.5433 | -16.80 | 34    | -   | 43   | 0    | --- R.MLAAATAFTR.I+ Oxidation (M)  |
| 1104.5414 | 1103.5342 | 1103.5103 | 21.6   | 289   | -   | 298  | 0    | --- R.CDLANGVMPK.K                 |
| 1120.5442 | 1119.5370 | 1119.5053 | 28.3   | 289   | -   | 298  | 0    | --- R.CDLANGVMPK.K + Oxidation (M) |
| 1569.6870 | 1568.6797 | 1568.7464 | -42.52 | 91    | -   | 104  | 1    | --- R.VTSSTVSETSQKCR.K             |
| 1602.7088 | 1601.7016 | 1601.7807 | -49.38 | 285   | -   | 298  | 1    | --- R.WGVRCDLANGVMPK.K             |
| 2002.0042 | 2000.9969 | 2001.0353 | -19.19 | 6     | -   | 24   | 1    | --- R.QAYSVPEAMKQLIGPGGQK.W        |

**No match to:** 986.4348, 989.5228, 995.4967, 1002.4741, 1008.5157, 1012.5478, 1016.5231, 1022.5053, 1024.4837, 1029.5837, 1040.5397, 1041.6120, 1056.5252, 1064.5983, 1186.6330, 1200.6600, 1211.5967, 1223.6135, 1225.5963, 1231.6372, 1245.6477, 1265.6787, 1303.6208, 1328.1044, 1342.7366, 1506.7227, 1547.8170, 1586.7055, 1726.8702, 1782.8947, 1895.9084, 1917.9002, 1932.8979, 2297.1880

**8. SYRM\_MOUSE Mass: 65865 Score: 32 Expect: 11 Matches: 6**

Probable arginyl-tRNA synthetase, mitochondrial OS=Mus musculus GN=Rars2 PE=2 SV=1

| Observed  | Mr(expt)  | Mr(calc)  | ppm    | Start | End | Miss | Ions | Peptide                  |
|-----------|-----------|-----------|--------|-------|-----|------|------|--------------------------|
| 1056.5252 | 1055.5180 | 1055.5301 | -11.50 | 222   | -   | 229  | 0    | --- K.LAHEFFHR.L         |
| 1120.5442 | 1119.5370 | 1119.5408 | -3.39  | 212   | -   | 221  | 1    | --- K.EATDDKNVT.K.L      |
| 1245.6477 | 1244.6404 | 1244.6976 | -45.97 | 276   | -   | 286  | 1    | --- K.SQDVLKLLDSK.G      |
| 1303.6208 | 1302.6136 | 1302.6276 | -10.81 | 57    | -   | 67   | 1    | --- K.SQVDTQDQARR.L      |
| 1917.9002 | 1916.8929 | 1916.9704 | -40.42 | 316   | -   | 333  | 1    | --- R.SDGTSLYATRDAAAHR.M |
| 2002.0042 | 2000.9969 | 2000.9268 | 35.0   | 258   | -   | 273  | 1    | --- K.RLGIYFDEYSGESFYR.E |

**No match to:** 986.4348, 989.5228, 995.4967, 1002.4741, 1008.5157, 1012.5478, 1016.5231, 1022.5053, 1024.4837, 1029.5837, 1040.5397, 1041.6120, 1064.5983, 1068.5327, 1104.5414, 1186.6330, 1200.6600, 1211.5967, 1223.6135, 1225.5963, 1231.6372, 1265.6787, 1328.1044, 1342.7366, 1506.7227, 1547.8170, 1569.6870, 1586.7055, 1602.7088, 1726.8702, 1782.8947, 1895.9084, 1932.8979, 2297.1880

**9. HXB2\_MOUSE Mass: 38528 Score: 32 Expect: 11 Matches: 1**

Homeobox protein Hox-B2 OS=Mus musculus GN=Hoxb2 PE=2 SV=1

| Observed  | Mr(expt)  | Mr(calc)  | ppm    | Start | End | Miss | Ions | Peptide             |
|-----------|-----------|-----------|--------|-------|-----|------|------|---------------------|
| 1342.7366 | 1341.7293 | 1341.7504 | -15.69 | 172   | -   | 183  | 0    | 27 R.VEIAALLDLTER.Q |

**No match to:** 986.4348, 989.5228, 995.4967, 1002.4741, 1008.5157, 1012.5478, 1016.5231, 1022.5053, 1024.4837, 1029.5837, 1040.5397, 1041.6120, 1056.5252, 1064.5983, 1068.5327, 1104.5414, 1120.5442, 1186.6330, 1200.6600, 1211.5967, 1223.6135, 1225.5963, 1231.6372, 1245.6477, 1265.6787, 1303.6208, 1328.1044, 1506.7227, 1547.8170, 1569.6870, 1586.7055, 1602.7088, 1726.8702, 1782.8947, 1895.9084, 1917.9002, 1932.8979, 2002.0042, 2297.1880

**10. HXA2\_MOUSE Mass: 41167 Score: 31 Expect: 12 Matches: 1**

Homeobox protein Hox-A2 OS=Mus musculus GN=Hoxa2 PE=2 SV=1

| Observed  | Mr(expt)  | Mr(calc)  | ppm    | Start | End | Miss | Ions | Peptide             |
|-----------|-----------|-----------|--------|-------|-----|------|------|---------------------|
| 1342.7366 | 1341.7293 | 1341.7504 | -15.69 | 170   | -   | 181  | 0    | 27 R.VEIAALLDLTER.Q |

**No match to:** 986.4348, 989.5228, 995.4967, 1002.4741, 1008.5157, 1012.5478, 1016.5231, 1022.5053, 1024.4837, 1029.5837, 1040.5397, 1041.6120, 1056.5252, 1064.5983, 1068.5327, 1104.5414, 1120.5442, 1186.6330, 1200.6600, 1211.5967, 1223.6135, 1225.5963, 1231.6372, 1245.6477, 1265.6787, 1303.6208, 1328.1044, 1506.7227, 1547.8170, 1569.6870, 1586.7055, 1602.7088, 1726.8702, 1782.8947, 1895.9084, 1917.9002, 1932.8979, 2002.0042, 2297.1880

**Search Parameters**

Type of search : MS/MS Ion Search  
Enzyme : Trypsin  
Fixed modifications : Carbamidomethyl (C)  
Variable modifications : Oxidation (M)  
Mass values : Monoisotopic  
Protein Mass : Unrestricted  
Peptide Mass Tolerance :  $\pm 50$  ppm  
Fragment Mass Tolerance:  $\pm 0.6$  Da  
Max Missed Cleavages : 1  
Instrument type : MALDI-TOF-TOF  
Query1 (986.4348,1+) : <no title>  
Query2 (989.5228,1+) : <no title>  
Query3 (995.4967,1+) : <no title>  
Query4 (1002.4741,1+) : <no title>  
Query5 (1008.5157,1+) : <no title>  
Query6 (1012.5478,1+) : <no title>  
Query7 (1016.5231,1+) : <no title>  
Query8 (1022.5053,1+) : <no title>  
Query9 (1024.4837,1+) : <no title>  
Query10 (1029.5837,1+) : <no title>  
Query11 (1040.5397,1+) : <no title>  
Query12 (1041.6120,1+) : <no title>  
Query13 (1056.5252,1+) : <no title>  
Query14 (1064.5983,1+) : <no title>  
Query15 (1068.5327,1+) : <no title>  
Query16 (1104.5414,1+) : <no title>  
Query17 (1120.5442,1+) : <no title>  
Query18 (1186.6330,1+) : <no title>  
Query19 (1200.6600,1+) : <no title>  
Query20 (1211.5967,1+) : <no title>  
Query21 (1223.6135,1+) : <no title>  
Query22 (1225.5963,1+) : <no title>  
Query23 (1231.6372,1+) : <no title>  
Query24 (1245.6477,1+) : <no title>  
Query25 (1265.6787,1+) : <no title>  
Query26 (1303.6208,1+) : <no title>  
Query27 (1328.1044,1+) : <no title>  
Query28 (1342.7366,1+) : <no title>  
Query29 (1506.7227,1+) : <no title>  
Query30 (1547.8170,1+) : <no title>  
Query31 (1569.6870,1+) : <no title>  
Query32 (1586.7055,1+) : <no title>  
Query33 (1602.7088,1+) : <no title>  
Query34 (1726.8702,1+) : <no title>

Query35 (1782.8947,1+) : <no title>

Query36 (1895.9084,1+) : <no title>

Query37 (1917.9002,1+) : <no title>

Query38 (1932.8979,1+) : <no title>

Query39 (2002.0042,1+) : <no title>

Query40 (2297.1880,1+) : <no title>

**Mascot:** <http://www.matrixscience.com/>

# **MASCOT** Mascot Search Results **SCIENCE**

User :  
 Email :  
 Search title : Auto submitted by BioTools  
 Database : SwissProt 57.15 (515203 sequences; 181334896 residues)  
 Taxonomy : Mus musculus (house mouse) (16230 sequences)  
 Timestamp : 5 Nov 2013 at 04:45:01 GMT  
 Warning : A Peptide summary report will usually give a much clearer picture of MS/MS search results.  
 Top Score : 190for ANXA2\_MOUSE, Annexin A2 OS=Mus musculus GN=Anxa2 PE=1 SV=2

## Mascot Score Histogram

Protein score is  $-10 \cdot \log(P)$ , where P is the probability that the observed match is a random event.

Protein scores greater than 55 are significant ( $p < 0.05$ ).

Protein scores are derived from ions scores as a non-probabilistic basis for ranking protein hits.

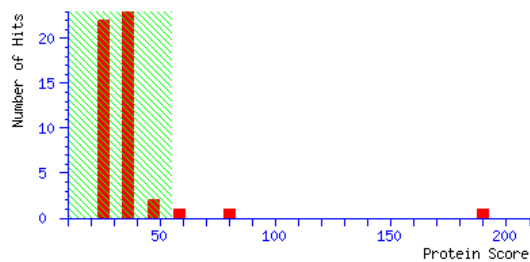

## Protein Summary Report

### Index

| Accession                       | Mass   | Score | Description                                                                         |
|---------------------------------|--------|-------|-------------------------------------------------------------------------------------|
| 1. <a href="#">ANXA2_MOUSE</a>  | 38937  | 190   | Annexin A2 OS=Mus musculus GN=Anxa2 PE=1 SV=2                                       |
| 2. <a href="#">CATB_MOUSE</a>   | 38168  | 82    | Cathepsin B OS=Mus musculus GN=Ctsb PE=1 SV=2                                       |
| 3. <a href="#">PRDX6_MOUSE</a>  | 24969  | 60    | Peroxiredoxin-6 OS=Mus musculus GN=Prdx6 PE=1 SV=3                                  |
| 4. <a href="#">APOA1_MOUSE</a>  | 30569  | 48    | Apolipoprotein A-I OS=Mus musculus GN=Apoa1 PE=1 SV=1                               |
| 5. <a href="#">XPO7_MOUSE</a>   | 125156 | 43    | Exportin-7 OS=Mus musculus GN=Xpo7 PE=2 SV=3                                        |
| 6. <a href="#">CKP2L_MOUSE</a>  | 83689  | 40    | Cytoskeleton-associated protein 2-like OS=Mus musculus GN=Ckap2l PE=2 SV=1          |
| 7. <a href="#">CP059_MOUSE</a>  | 48559  | 37    | Uncharacterized protein C16orf59 homolog OS=Mus musculus PE=2 SV=1                  |
| 8. <a href="#">CN138_MOUSE</a>  | 25804  | 37    | Uncharacterized protein C14orf138 homolog OS=Mus musculus GN=Gm71 PE=2 SV=2         |
| 9. <a href="#">ECHB_MOUSE</a>   | 51639  | 36    | Trifunctional enzyme subunit beta, mitochondrial OS=Mus musculus GN=Hadhb PE=1 SV=1 |
| 10. <a href="#">JAZF1_MOUSE</a> | 27479  | 35    | Juxtaposed with another zinc finger protein 1 OS=Mus musculus GN=Jazf1 PE=2 SV=2    |

## Results List

1. [ANXA2\\_MOUSE](#) Mass: 38937 Score: 190 Expect: 1.6e-015 Matches: 10

Annexin A2 OS=Mus musculus GN=Anxa2 PE=1 SV=2

**Observed Mr(expt) Mr(calc) ppm Start End Miss Ions Peptide**

1050.5622 1049.5549 1049.5505 4.20 197 - 205 1 --- R.ELYDAGVVKR.K  
1111.5756 1110.5684 1110.5458 20.3 69 - 77 0 53 R.QDIAFAYQR.R  
1244.6387 1243.6315 1243.6156 12.7 136 - 145 0 --- R.TNQELQEINR.V  
1542.8636 1541.8564 1541.8413 9.75 50 - 63 0 35 K.GVDEVTIVNILTNR.S  
1772.0178 1771.0105 1770.9840 15.0 48 - 63 1 --- K.TKGVDEVTIVNILTNR.S  
1777.8777 1776.8704 1776.8564 7.92 120 - 135 0 25 K.GLGTDEDSLIEICSR.T  
1811.9030 1810.8957 1810.8585 20.6 153 - 168 1 --- K.TDLEKDIISDTSGDFR.K  
1908.9004 1907.8932 1907.8748 9.60 180 - 196 0 --- R.AEDGSVIDYELIDQDAR.E  
2065.0159 2064.0086 2063.9760 15.8 179 - 196 1 --- R.RAEDGSVIDYELIDQDAR.E  
2938.3639 2937.3566 2937.3781 -7.31 11 - 37 0 --- K.LSLEGDHSTPPSAYGSVKPYTNFDAER.D

**No match to:** 827.4452, 956.5438, 1039.5825, 1040.5975, 1047.5639, 1061.5757, 1083.5465, 1094.5524, 1130.6013, 1149.6219, 1171.6306, 1191.6909, 1237.6354, 1250.6190, 1258.7248, 1270.6925, 1272.5969, 1288.6172, 1297.6702, 1312.6763, 1314.6471, 1318.6896, 1329.6845, 1331.6596, 1340.7277, 1345.6813, 1354.7322, 1381.6473, 1395.6805, 1479.7749, 1582.9183, 1714.8114, 1783.9305, 1790.8872, 1832.9854, 1837.9039, 1851.9086, 1862.9488, 1901.9240, 1917.9142, 1922.9210, 1932.9820, 1939.9763, 1992.0198, 2013.9730, 2142.1035, 2170.0910

2. CATB\_MOUSE Mass: 38168 Score: 82 Expect: 9.3e-005 Matches: 3

Cathepsin B OS=Mus musculus GN=Ctsb PE=1 SV=2

**Observed Mr(expt) Mr(calc) ppm Start End Miss Ions Peptide**

1381.6473 1380.6400 1380.6027 27.0 269 - 281 0 --- K.HEAGDMMGGHAIR.I  
1837.9039 1836.8966 1836.8788 9.70 315 - 331 0 67 R.GENHCGIESEIVAGIPR.T  
1992.0198 1991.0125 1990.9677 22.5 246 - 263 0 --- K.NGPVEGAFTVFSDFLYK.S

**No match to:** 827.4452, 956.5438, 1039.5825, 1040.5975, 1047.5639, 1050.5622, 1061.5757, 1083.5465, 1094.5524, 1111.5756, 1130.6013, 1149.6219, 1171.6306, 1191.6909, 1237.6354, 1244.6387, 1250.6190, 1258.7248, 1270.6925, 1272.5969, 1288.6172, 1297.6702, 1312.6763, 1314.6471, 1318.6896, 1329.6845, 1331.6596, 1340.7277, 1345.6813, 1354.7322, 1395.6805, 1479.7749, 1542.8636, 1582.9183, 1714.8114, 1772.0178, 1777.8777, 1783.9305, 1790.8872, 1811.9030, 1832.9854, 1851.9086, 1862.9488, 1901.9240, 1908.9004, 1917.9142, 1922.9210, 1932.9820, 1939.9763, 2013.9730, 2065.0159, 2142.1035, 2170.0910, 2938.3639

3. PRDX6\_MOUSE Mass: 24969 Score: 60 Expect: 0.017 Matches: 7

Peroxiredoxin-6 OS=Mus musculus GN=Prdx6 PE=1 SV=3

**Observed Mr(expt) Mr(calc) ppm Start End Miss Ions Peptide**

1149.6219 1148.6146 1148.6594 -39.00 133 - 142 1 --- R.VVFIFGPDKK.L  
1191.6909 1190.6836 1190.6659 14.9 145 - 155 0 --- K.LSILYPATIGR.N  
1270.6925 1269.6852 1269.7081 -18.06 98 - 108 1 --- K.LPFPIDDKGR.D  
1395.6805 1394.6732 1394.6500 16.6 42 - 53 0 --- R.DFTPVCITELGR.A  
1542.8636 1541.8564 1541.8375 12.3 109 - 122 0 --- R.DLAILLGMLDPVEK.D + Oxidation (M)  
1832.9854 1831.9781 1831.9237 29.7 183 - 199 1 --- K.KGESVMVPTLSEEEAK.Q  
2142.1035 2141.0962 2141.0753 9.77 2 - 22 0 --- M.PGGLLLGDEAPNFEANTTIGR.I

**No match to:** 827.4452, 956.5438, 1039.5825, 1040.5975, 1047.5639, 1050.5622, 1061.5757, 1083.5465, 1094.5524, 1111.5756, 1130.6013, 1171.6306, 1237.6354, 1244.6387, 1250.6190, 1258.7248, 1272.5969, 1288.6172, 1297.6702, 1312.6763, 1314.6471, 1318.6896, 1329.6845, 1331.6596, 1340.7277, 1345.6813, 1354.7322, 1381.6473, 1479.7749, 1582.9183, 1714.8114, 1772.0178, 1777.8777, 1783.9305, 1790.8872, 1811.9030, 1837.9039, 1851.9086, 1862.9488, 1901.9240, 1908.9004, 1917.9142, 1922.9210, 1932.9820, 1939.9763, 1992.0198, 2013.9730,

2065.0159, 2170.0910, 2938.3639

4. APOA1\_MOUSE Mass: 30569 Score: 48 Expect: 0.28 Matches: 9

Apolipoprotein A-I OS=Mus musculus GN=Apoa1 PE=1 SV=1

**Observed Mr(expt) Mr(calc) ppm Start End Miss Ions Peptide**

827.4452 826.4379 826.4297 9.94 177 - 183 0 --- R.THVDSLRT  
1040.5975 1039.5903 1039.5774 12.4 228 - 236 0 --- K.ARPAEDLR.H  
1047.5639 1046.5566 1046.5396 16.2 164 - 172 0 --- R.LSPVAEEFR.D  
1130.6013 1129.5941 1129.5662 24.6 175 - 183 1 --- R.MRTHVDSLRT + Oxidation (M)  
1237.6354 1236.6281 1236.6139 11.5 131 - 139 1 --- K.WKEDVELYR.Q  
1297.6702 1296.6629 1296.6245 29.7 184 - 194 0 --- R.TQLAPHSEQMRE  
1318.6896 1317.6824 1317.6677 11.1 164 - 174 1 --- R.LSPVAEEFRDR.M  
1331.6596 1330.6523 1330.6625 -7.65 237 - 247 0 --- R.HSLMPMLETLK.T + 2 Oxidation (M)  
1340.7277 1339.7204 1339.7095 8.10 142 - 154 0 --- K.VAPLGAELQESAR.Q

**No match to:** 956.5438, 1039.5825, 1050.5622, 1061.5757, 1083.5465, 1094.5524, 1111.5756, 1149.6219, 1171.6306, 1191.6909, 1244.6387, 1250.6190, 1258.7248, 1270.6925, 1272.5969, 1288.6172, 1312.6763, 1314.6471, 1329.6845, 1345.6813, 1354.7322, 1381.6473, 1395.6805, 1479.7749, 1542.8636, 1582.9183, 1714.8114, 1772.0178, 1777.8777, 1783.9305, 1790.8872, 1811.9030, 1832.9854, 1837.9039, 1851.9086, 1862.9488, 1901.9240, 1908.9004, 1917.9142, 1922.9210, 1932.9820, 1939.9763, 1992.0198, 2013.9730, 2065.0159, 2142.1035, 2170.0910, 2938.3639

5. XPO7\_MOUSE Mass: 125156 Score: 43 Expect: 0.79 Matches: 11

Exportin-7 OS=Mus musculus GN=Xpo7 PE=2 SV=3

**Observed Mr(expt) Mr(calc) ppm Start End Miss Ions Peptide**

1083.5465 1082.5393 1082.5509 -10.74 1058 - 1066 0 --- R.FTQNLSAFR.R  
1149.6219 1148.6146 1148.5938 18.1 293 - 302 1 --- R.SLFNNAERAK.F  
1171.6306 1170.6233 1170.5777 39.0 831 - 840 0 --- K.GISICFSQLK.A + Oxidation (M)  
1191.6909 1190.6836 1190.6659 14.9 559 - 568 1 --- R.KIYIGDQVQK.S  
1270.6925 1269.6852 1269.7194 -26.92 303 - 313 1 --- K.FLSHLVDGVKR.I  
1345.6813 1344.6740 1344.6609 9.81 664 - 674 1 --- R.CRITTFYALGR.L  
1354.7322 1353.7249 1353.6789 33.9 1056 - 1066 1 --- R.DRFTQNLSAFR.R  
1395.6805 1394.6732 1394.7017 -20.42 115 - 125 1 --- R.IIKLGFDCQK.D  
1862.9488 1861.9415 1861.8768 34.8 396 - 411 0 --- K.ATEPHMLETYTPEVTK.A + Oxidation (M)  
2013.9730 2012.9657 2013.0030 -18.53 757 - 773 0 --- R.AIELWYHDPACTPVLK.L  
2142.1035 2141.0962 2141.1150 -8.79 54 - 73 1 --- R.GSSSYSQLLAATCLTKLVSRT

**No match to:** 827.4452, 956.5438, 1039.5825, 1040.5975, 1047.5639, 1050.5622, 1061.5757, 1094.5524, 1111.5756, 1130.6013, 1237.6354, 1244.6387, 1250.6190, 1258.7248, 1272.5969, 1288.6172, 1297.6702, 1312.6763, 1314.6471, 1318.6896, 1329.6845, 1331.6596, 1340.7277, 1381.6473, 1479.7749, 1542.8636, 1582.9183, 1714.8114, 1772.0178, 1777.8777, 1783.9305, 1790.8872, 1811.9030, 1832.9854, 1837.9039, 1851.9086, 1901.9240, 1908.9004, 1917.9142, 1922.9210, 1932.9820, 1939.9763, 1992.0198, 2065.0159, 2170.0910, 2938.3639

6. CKP2L\_MOUSE Mass: 83689 Score: 40 Expect: 1.7 Matches: 9

Cytoskeleton-associated protein 2-like OS=Mus musculus GN=Ckap2l PE=2 SV=1

**Observed Mr(expt) Mr(calc) ppm Start End Miss Ions Peptide**

1130.6013 1129.5941 1129.5437 44.5 138 - 146 0 --- R.QCPDIQELK.T

1149.6219 1148.6146 1148.6223 -6.73 286 - 295 1 --- K.TQTSKKPMTK.N  
 1191.6909 1190.6836 1190.6407 36.0 305 - 314 1 --- R.VRYGKPNETKI  
 1244.6387 1243.6315 1243.6924 -49.01 31 - 41 1 --- K.DPNAKPYLKAK.N  
 1288.6172 1287.6099 1287.6320 -17.13 447 - 459 0 --- K.GAPSATQTHPHGK.K  
 1312.6763 1311.6690 1311.6419 20.7 2 - 15 0 --- M.VGPGPTASAAAEEER.W  
 1395.6805 1394.6732 1394.7015 -20.27 147 - 159 1 --- K.TKQQQAHHGNAK.C  
 1901.9240 1900.9167 1900.9101 3.46 1 - 18 1 --- -.MVGPGPTASAAAEEERWQK.L + Oxidation (M)  
 2170.0910 2169.0838 2169.1793 -44.06 77 - 96 0 --- K.FQTKPASITASQKPESKPPK.L

**No match to:** 827.4452, 956.5438, 1039.5825, 1040.5975, 1047.5639, 1050.5622, 1061.5757, 1083.5465, 1094.5524, 1111.5756, 1171.6306, 1237.6354, 1250.6190, 1258.7248, 1270.6925, 1272.5969, 1297.6702, 1314.6471, 1318.6896, 1329.6845, 1331.6596, 1340.7277, 1345.6813, 1354.7322, 1381.6473, 1479.7749, 1542.8636, 1582.9183, 1714.8114, 1772.0178, 1777.8777, 1783.9305, 1790.8872, 1811.9030, 1832.9854, 1837.9039, 1851.9086, 1862.9488, 1908.9004, 1917.9142, 1922.9210, 1932.9820, 1939.9763, 1992.0198, 2013.9730, 2065.0159, 2142.1035, 2938.3639

**7. CP059\_MOUSE** Mass: 48559 Score: 37 Expect: 3 Matches: 7

Uncharacterized protein C16orf59 homolog OS=Mus musculus PE=2 SV=1

| Observed  | Mr(expt)  | Mr(calc)  | ppm    | Start | End | Miss | Ions | Peptide                 |
|-----------|-----------|-----------|--------|-------|-----|------|------|-------------------------|
| 1111.5756 | 1110.5684 | 1110.6186 | -45.19 | 46    | 54  | 0    | ---  | R.LLQVWEPAR.T           |
| 1250.6190 | 1249.6117 | 1249.5898 | 17.5   | 232   | 243 | 1    | ---  | R.TNDSTDATRAAK.T        |
| 1381.6473 | 1380.6400 | 1380.6786 | -27.94 | 147   | 158 | 1    | ---  | R.ATAPPKDYPEHR.L        |
| 1783.9305 | 1782.9232 | 1782.9199 | 1.86   | 2     | 17  | 1    | ---  | M.LGVKGNLYLLPADCAHR.L   |
| 1832.9854 | 1831.9781 | 1831.9111 | 36.6   | 216   | 231 | 1    | ---  | K.AVSRNSCLWAQLNSAR.T    |
| 1901.9240 | 1900.9167 | 1900.9425 | -13.57 | 18    | 34  | 1    | ---  | R.LVAELQGALDSCADRQR.Q   |
| 2142.1035 | 2141.0962 | 2141.0211 | 35.1   | 183   | 201 | 0    | ---  | R.DQQMTPSSAHHTTELFALK.E |

**No match to:** 827.4452, 956.5438, 1039.5825, 1040.5975, 1047.5639, 1050.5622, 1061.5757, 1083.5465, 1094.5524, 1130.6013, 1149.6219, 1171.6306, 1191.6909, 1237.6354, 1244.6387, 1258.7248, 1270.6925, 1272.5969, 1288.6172, 1297.6702, 1312.6763, 1314.6471, 1318.6896, 1329.6845, 1331.6596, 1340.7277, 1345.6813, 1354.7322, 1395.6805, 1479.7749, 1542.8636, 1582.9183, 1714.8114, 1772.0178, 1777.8777, 1790.8872, 1811.9030, 1837.9039, 1851.9086, 1862.9488, 1908.9004, 1917.9142, 1922.9210, 1932.9820, 1939.9763, 1992.0198, 2013.9730, 2065.0159, 2170.0910, 2938.3639

**8. CN138\_MOUSE** Mass: 25804 Score: 37 Expect: 3.2 Matches: 5

Uncharacterized protein C14orf138 homolog OS=Mus musculus GN=Gm71 PE=2 SV=2

| Observed  | Mr(expt)  | Mr(calc)  | ppm    | Start | End | Miss | Ions | Peptide                                 |
|-----------|-----------|-----------|--------|-------|-----|------|------|-----------------------------------------|
| 1039.5825 | 1038.5752 | 1038.5822 | -6.74  | 113   | 122 | 0    | ---  | K.HLVTGSVQAK.V                          |
| 1244.6387 | 1243.6315 | 1243.6561 | -19.78 | 211   | 220 | 0    | ---  | R.SEDIHIVYIR.K                          |
| 1777.8777 | 1776.8704 | 1776.8431 | 15.4   | 52    | 68  | 0    | 10   | K.YLETPGFSGDGAHALSR.R                   |
| 1901.9240 | 1900.9167 | 1900.9499 | -17.46 | 106   | 122 | 1    | ---  | K.MNIDMNKHLVTGSVQAK.V + Oxidation (M)   |
| 1917.9142 | 1916.9070 | 1916.9448 | -19.74 | 106   | 122 | 1    | ---  | K.MNIDMNKHLVTGSVQAK.V + 2 Oxidation (M) |

**No match to:** 827.4452, 956.5438, 1040.5975, 1047.5639, 1050.5622, 1061.5757, 1083.5465, 1094.5524, 1111.5756, 1130.6013, 1149.6219, 1171.6306, 1191.6909, 1237.6354, 1250.6190, 1258.7248, 1270.6925, 1272.5969, 1288.6172, 1297.6702, 1312.6763, 1314.6471, 1318.6896, 1329.6845, 1331.6596, 1340.7277, 1345.6813, 1354.7322, 1381.6473, 1395.6805, 1479.7749, 1542.8636, 1582.9183, 1714.8114, 1772.0178, 1783.9305, 1790.8872, 1811.9030, 1832.9854, 1837.9039, 1851.9086, 1862.9488, 1908.9004, 1922.9210, 1932.9820, 1939.9763, 1992.0198, 2013.9730, 2065.0159, 2142.1035, 2170.0910, 2938.3639

9. ECHB\_MOUSE Mass: 51639 Score: 36 Expect: 4 Matches: 8

Trifunctional enzyme subunit beta, mitochondrial OS=Mus musculus GN=Hadhb PE=1 SV=1

| Observed  | Mr(expt)  | Mr(calc)  | ppm    | Start | End | Miss | Ions | Peptide                                   |
|-----------|-----------|-----------|--------|-------|-----|------|------|-------------------------------------------|
| 1039.5825 | 1038.5752 | 1038.5710 | 4.07   | 2     | -   | 10   | 0    | --- M.TTILTSTFR.N                         |
| 1083.5465 | 1082.5393 | 1082.5179 | 19.8   | 74    | -   | 82   | 0    | --- K.DLMPHDLAR.A + Oxidation (M)         |
| 1130.6013 | 1129.5941 | 1129.6390 | -39.75 | 438   | -   | 447  | 1    | --- R.LVMAAANRLR.K + Oxidation (M)        |
| 1714.8114 | 1713.8041 | 1713.8726 | -39.97 | 336   | -   | 349  | 1    | --- K.AYLRDFIYVSQDPK.D                    |
| 1777.8777 | 1776.8704 | 1776.8464 | 13.5   | 240   | -   | 254  | 1    | --- R.MEQDEYALRSHSLAK.K                   |
| 1837.9039 | 1836.8966 | 1836.9873 | -49.37 | 97    | -   | 112  | 0    | --- K.DVVVDYIIFGTVIQEVK.T                 |
| 1901.9240 | 1900.9167 | 1900.9928 | -40.04 | 1     | -   | 17   | 1    | --- -.MTTILTSTFRNLSTTSK.W                 |
| 1917.9142 | 1916.9070 | 1916.9877 | -42.13 | 1     | -   | 17   | 1    | --- -.MTTILTSTFRNLSTTSK.W + Oxidation (M) |

No match to: 827.4452, 956.5438, 1040.5975, 1047.5639, 1050.5622, 1061.5757, 1094.5524, 1111.5756, 1149.6219, 1171.6306, 1191.6909, 1237.6354, 1244.6387, 1250.6190, 1258.7248, 1270.6925, 1272.5969, 1288.6172, 1297.6702, 1312.6763, 1314.6471, 1318.6896, 1329.6845, 1331.6596, 1340.7277, 1345.6813, 1354.7322, 1381.6473, 1395.6805, 1479.7749, 1542.8636, 1582.9183, 1772.0178, 1783.9305, 1790.8872, 1811.9030, 1832.9854, 1851.9086, 1862.9488, 1908.9004, 1922.9210, 1932.9820, 1939.9763, 1992.0198, 2013.9730, 2065.0159, 2142.1035, 2170.0910, 2938.3639

10. JAZF1\_MOUSE Mass: 27479 Score: 35 Expect: 4.7 Matches: 5

Juxtaposed with another zinc finger protein 1 OS=Mus musculus GN=Jazf1 PE=2 SV=2

| Observed  | Mr(expt)  | Mr(calc)  | ppm    | Start | End | Miss | Ions | Peptide                                  |
|-----------|-----------|-----------|--------|-------|-----|------|------|------------------------------------------|
| 827.4452  | 826.4379  | 826.4297  | 9.94   | 95    | -   | 102  | 0    | --- R.GNVSTPPR.H                         |
| 1149.6219 | 1148.6146 | 1148.6401 | -22.19 | 84    | -   | 94   | 0    | --- K.LSITLSSSVSR.G                      |
| 1901.9240 | 1900.9167 | 1900.9366 | -10.48 | 224   | -   | 239  | 0    | --- R.HHTINFHPPVSAEMIR.K + Oxidation (M) |
| 1922.9210 | 1921.9137 | 1921.9897 | -39.55 | 48    | -   | 63   | 0    | --- K.QELQQPTYVALSYINR.F                 |
| 2013.9730 | 2012.9657 | 2013.0367 | -35.26 | 224   | -   | 240  | 1    | --- R.HHTINFHPPVSAEMIRK.M                |

No match to: 956.5438, 1039.5825, 1040.5975, 1047.5639, 1050.5622, 1061.5757, 1083.5465, 1094.5524, 1111.5756, 1130.6013, 1171.6306, 1191.6909, 1237.6354, 1244.6387, 1250.6190, 1258.7248, 1270.6925, 1272.5969, 1288.6172, 1297.6702, 1312.6763, 1314.6471, 1318.6896, 1329.6845, 1331.6596, 1340.7277, 1345.6813, 1354.7322, 1381.6473, 1395.6805, 1479.7749, 1542.8636, 1582.9183, 1714.8114, 1772.0178, 1777.8777, 1783.9305, 1790.8872, 1811.9030, 1832.9854, 1837.9039, 1851.9086, 1862.9488, 1908.9004, 1917.9142, 1932.9820, 1939.9763, 1992.0198, 2065.0159, 2142.1035, 2170.0910, 2938.3639

Search Parameters

Type of search : MS/MS Ion Search  
Enzyme : Trypsin  
Fixed modifications : Carbamidomethyl (C)  
Variable modifications : Oxidation (M)  
Mass values : Monoisotopic  
Protein Mass : Unrestricted  
Peptide Mass Tolerance :  $\pm 50$  ppm  
Fragment Mass Tolerance:  $\pm 0.6$  Da  
Max Missed Cleavages : 1  
Instrument type : MALDI-TOF-TOF  
Query1 (827.4452,1+) : <no title>



Query2 (956.5438,1+) : <no title>  
Query3 (1039.5825,1+) : <no title>  
Query4 (1040.5975,1+) : <no title>  
Query5 (1047.5639,1+) : <no title>  
Query6 (1050.5622,1+) : <no title>  
Query7 (1061.5757,1+) : <no title>  
Query8 (1083.5465,1+) : <no title>  
Query9 (1094.5524,1+) : <no title>  
Query10 (1111.5756,1+) : <no title>  
Query11 (1130.6013,1+) : <no title>  
Query12 (1149.6219,1+) : <no title>  
Query13 (1171.6306,1+) : <no title>  
Query14 (1191.6909,1+) : <no title>  
Query15 (1237.6354,1+) : <no title>  
Query16 (1244.6387,1+) : <no title>  
Query17 (1250.6190,1+) : <no title>  
Query18 (1258.7248,1+) : <no title>  
Query19 (1270.6925,1+) : <no title>  
Query20 (1272.5969,1+) : <no title>  
Query21 (1288.6172,1+) : <no title>  
Query22 (1297.6702,1+) : <no title>  
Query23 (1312.6763,1+) : <no title>  
Query24 (1314.6471,1+) : <no title>  
Query25 (1318.6896,1+) : <no title>  
Query26 (1329.6845,1+) : <no title>  
Query27 (1331.6596,1+) : <no title>  
Query28 (1340.7277,1+) : <no title>  
Query29 (1345.6813,1+) : <no title>  
Query30 (1354.7322,1+) : <no title>  
Query31 (1381.6473,1+) : <no title>  
Query32 (1395.6805,1+) : <no title>  
Query33 (1479.7749,1+) : <no title>  
Query34 (1542.8636,1+) : <no title>  
Query35 (1582.9183,1+) : <no title>  
Query36 (1714.8114,1+) : <no title>  
Query37 (1772.0178,1+) : <no title>  
Query38 (1777.8777,1+) : <no title>  
Query39 (1783.9305,1+) : <no title>  
Query40 (1790.8872,1+) : <no title>  
Query41 (1811.9030,1+) : <no title>  
Query42 (1832.9854,1+) : <no title>  
Query43 (1837.9039,1+) : <no title>  
Query44 (1851.9086,1+) : <no title>  
Query45 (1862.9488,1+) : <no title>

Query46 (1901.9240,1+) : <no title>

Query47 (1908.9004,1+) : <no title>

Query48 (1917.9142,1+) : <no title>

Query49 (1922.9210,1+) : <no title>

Query50 (1932.9820,1+) : <no title>

Query51 (1939.9763,1+) : <no title>

Query52 (1992.0198,1+) : <no title>

Query53 (2013.9730,1+) : <no title>

Query54 (2065.0159,1+) : <no title>

Query55 (2142.1035,1+) : <no title>

Query56 (2170.0910,1+) : <no title>

Query57 (2938.3639,1+) : <no title>

**Mascot:** <http://www.matrixscience.com/>

# **MASCOT** Mascot Search Results **SCIENCE**

User :  
 Email :  
 Search title : Auto submitted by BioTools  
 Database : SwissProt 57.15 (515203 sequences; 181334896 residues)  
 Taxonomy : Mus musculus (house mouse) (16230 sequences)  
 Timestamp : 5 Nov 2013 at 04:44:30 GMT  
 Warning : A Peptide summary report will usually give a much clearer picture of MS/MS search results.  
 Top Score : 206 for K1C19\_MOUSE, Keratin, type I cytoskeletal 19 OS=Mus musculus GN=Krt19 PE=2 SV=1

## Mascot Score Histogram

Protein score is  $-10 \cdot \log(P)$ , where P is the probability that the observed match is a random event.

Protein scores greater than 55 are significant ( $p < 0.05$ ).

Protein scores are derived from ions scores as a non-probabilistic basis for ranking protein hits.

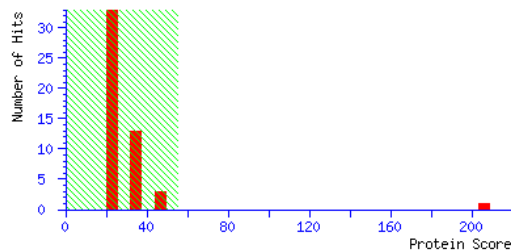

## Protein Summary Report

### Index

| Accession                       | Mass   | Score | Description                                                                                            |
|---------------------------------|--------|-------|--------------------------------------------------------------------------------------------------------|
| 1. <a href="#">K1C19_MOUSE</a>  | 44515  | 206   | Keratin, type I cytoskeletal 19 OS=Mus musculus GN=Krt19 PE=2 SV=1                                     |
| 2. <a href="#">C1116_MOUSE</a>  | 18881  | 53    | UPF0691 protein C9orf16 homolog OS=Mus musculus PE=2 SV=1                                              |
| 3. <a href="#">PSB1_MOUSE</a>   | 26583  | 44    | Proteasome subunit beta type-1 OS=Mus musculus GN=Psm1 PE=1 SV=1                                       |
| 4. <a href="#">K1C14_MOUSE</a>  | 53176  | 43    | Keratin, type I cytoskeletal 14 OS=Mus musculus GN=Krt14 PE=1 SV=2                                     |
| 5. <a href="#">PDK1_MOUSE</a>   | 49237  | 38    | [Pyruvate dehydrogenase [lipoamide]] kinase isozyme 1, mitochondrial OS=Mus musculus GN=Pdk1 PE=2 SV=1 |
| 6. <a href="#">SH21A_MOUSE</a>  | 14066  | 38    | SH2 domain-containing protein 1A OS=Mus musculus GN=Sh2d1a PE=2 SV=1                                   |
| 7. <a href="#">TSC1_MOUSE</a>   | 129692 | 34    | Hamartin OS=Mus musculus GN=Tsc1 PE=1 SV=1                                                             |
| 8. <a href="#">K1C17_MOUSE</a>  | 48417  | 34    | Keratin, type I cytoskeletal 17 OS=Mus musculus GN=Krt17 PE=1 SV=3                                     |
| 9. <a href="#">SPEF2_MOUSE</a>  | 199477 | 33    | Sperm flagellar protein 2 OS=Mus musculus GN=Spef2 PE=2 SV=2                                           |
| 10. <a href="#">IFIT2_MOUSE</a> | 55784  | 31    | Interferon-induced protein with tetratricopeptide repeats 2 OS=Mus musculus GN=Ifit2 PE=2 SV=1         |

## Results List

1. K1C19\_MOUSE Mass: 44515 Score: 206 Expect: 4.1e-017 Matches: 8

Keratin, type I cytoskeletal 19 OS=Mus musculus GN=Krt19 PE=2 SV=1

| Observed  | Mr(expt)  | Mr(calc)  | ppm    | Start | End   | Miss | Ions | Peptide                 |
|-----------|-----------|-----------|--------|-------|-------|------|------|-------------------------|
| 989.5469  | 988.5396  | 988.5302  | 9.58   | 297   | - 304 | 1    | ---  | K.TEVTDLRR.T            |
| 1009.5146 | 1008.5073 | 1008.4876 | 19.5   | 269   | - 277 | 0    | 38   | K.DAEATYLAR.I           |
| 1122.5945 | 1121.5872 | 1121.5717 | 13.9   | 376   | - 384 | 0    | ---  | R.LEQEIATYR.S           |
| 1137.5498 | 1136.5425 | 1136.5826 | -35.22 | 268   | - 277 | 1    | ---  | R.KDAEATYLAR.I          |
| 1331.6744 | 1330.6671 | 1330.6728 | -4.28  | 321   | - 333 | 0    | 41   | K.AALEGTLAETEAR.Y       |
| 1365.7361 | 1364.7288 | 1364.7048 | 17.6   | 374   | - 384 | 1    | 34   | K.SRLEQEIATYR.S         |
| 1910.8976 | 1909.8903 | 1909.9534 | -33.02 | 385   | - 401 | 0    | ---  | R.SLLEGQEAHYNNLPTPK.A   |
| 2166.0590 | 2165.0517 | 2165.1328 | -37.45 | 278   | - 296 | 0    | ---  | R.IEELNTQVAVHSEQIQISK.T |

No match to: 1136.5756, 1345.6617, 1351.1476, 1419.7396, 1932.9002, 2167.6396, 2188.0876, 2204.0709, 2216.1287

2. C116\_MOUSE Mass: 18881 Score: 53 Expect: 0.087 Matches: 4

UPF0691 protein C9orf16 homolog OS=Mus musculus PE=2 SV=1

| Observed  | Mr(expt)  | Mr(calc)  | ppm   | Start | End   | Miss | Ions | Peptide                                 |
|-----------|-----------|-----------|-------|-------|-------|------|------|-----------------------------------------|
| 1009.5146 | 1008.5073 | 1008.5062 | 1.03  | 98    | - 106 | 0    | ---  | R.APTVHEMPK.V                           |
| 1331.6744 | 1330.6671 | 1330.6670 | 0.11  | 107   | - 117 | 1    | ---  | K.VFYSSNKFSR.Q                          |
| 1932.9002 | 1931.8929 | 1931.8948 | -0.97 | 152   | - 167 | 0    | ---  | R.LNFHPSYNNRPSICD.-                     |
| 2188.0876 | 2187.0803 | 2187.0531 | 12.4  | 118   | - 136 | 0    | ---  | R.QHAAFGMFQSHNINVTLEK.S + Oxidation (M) |

No match to: 989.5469, 1122.5945, 1136.5756, 1137.5498, 1345.6617, 1351.1476, 1365.7361, 1419.7396, 1910.8976, 2166.0590, 2167.6396, 2204.0709, 2216.1287

3. PSB1\_MOUSE Mass: 26583 Score: 44 Expect: 0.62 Matches: 1

Proteasome subunit beta type-1 OS=Mus musculus GN=Psmb1 PE=1 SV=1

| Observed  | Mr(expt)  | Mr(calc)  | ppm  | Start | End   | Miss | Ions | Peptide      |
|-----------|-----------|-----------|------|-------|-------|------|------|--------------|
| 1009.5146 | 1008.5073 | 1008.4876 | 19.5 | 213   | - 221 | 0    | 37   | R.DVYTGDLR.I |

No match to: 989.5469, 1122.5945, 1136.5756, 1137.5498, 1331.6744, 1345.6617, 1351.1476, 1365.7361, 1419.7396, 1910.8976, 1932.9002, 2166.0590, 2167.6396, 2188.0876, 2204.0709, 2216.1287

4. K1C14\_MOUSE Mass: 53176 Score: 43 Expect: 0.74 Matches: 5

Keratin, type I cytoskeletal 14 OS=Mus musculus GN=Krt14 PE=1 SV=2

| Observed  | Mr(expt)  | Mr(calc)  | ppm    | Start | End   | Miss | Ions | Peptide                              |
|-----------|-----------|-----------|--------|-------|-------|------|------|--------------------------------------|
| 989.5469  | 988.5396  | 988.5301  | 9.61   | 335   | - 342 | 1    | ---  | K.SEISELRR.T                         |
| 1009.5146 | 1008.5073 | 1008.4876 | 19.5   | 210   | - 217 | 0    | 6    | K.FETEQLR.M                          |
| 1122.5945 | 1121.5872 | 1121.5717 | 13.9   | 414   | - 422 | 0    | ---  | R.LEQEIATYR.R                        |
| 1345.6617 | 1344.6544 | 1344.6772 | -16.95 | 141   | - 152 | 0    | ---  | R.ALEEANTELEVK.I                     |
| 1910.8976 | 1909.8903 | 1909.9567 | -34.80 | 123   | - 138 | 1    | ---  | K.VTMQNLNDRLATYLDK.V + Oxidation (M) |

No match to: 1136.5756, 1137.5498, 1331.6744, 1351.1476, 1365.7361, 1419.7396, 1932.9002, 2166.0590, 2167.6396, 2188.0876, 2204.0709, 2216.1287

5. PDK1\_MOUSE Mass: 49237 Score: 38 Expect: 2.6 Matches: 5

[Pyruvate dehydrogenase [lipoamide]] kinase isozyme 1, mitochondrial OS=Mus musculus GN=Pdk1 PE=2 SV=1

| Observed  | Mr(expt)  | Mr(calc)  | ppm    | Start | End | Miss | Ions | Peptide                                |
|-----------|-----------|-----------|--------|-------|-----|------|------|----------------------------------------|
| 1009.5146 | 1008.5073 | 1008.4950 | 12.2   | 52    | 60  | 0    | ---  | R.FSPSPLSMK.Q + Oxidation (M)          |
| 1345.6617 | 1344.6544 | 1344.6714 | -12.60 | 362   | 372 | 0    | ---  | R.LYAQYFQGDLK.L                        |
| 1910.8976 | 1909.8903 | 1909.8377 | 27.5   | 411   | 426 | 1    | ---  | K.ANHEADDWCVPSREPK.D                   |
| 2188.0876 | 2187.0803 | 2187.0895 | -4.18  | 329   | 346 | 1    | ---  | R.LFNMYSTAPRPRVETS.R.A                 |
| 2204.0709 | 2203.0636 | 2203.0844 | -9.45  | 329   | 346 | 1    | ---  | R.LFNMYSTAPRPRVETS.R.A + Oxidation (M) |

**No match to:** 989.5469, 1122.5945, 1136.5756, 1137.5498, 1331.6744, 1351.1476, 1365.7361, 1419.7396, 1932.9002, 2166.0590, 2167.6396, 2216.1287

**6. SH21A\_MOUSE Mass: 14066 Score: 38 Expect: 2.6 Matches: 3**

SH2 domain-containing protein 1A OS=Mus musculus GN=Sh2d1a PE=2 SV=1

| Observed  | Mr(expt)  | Mr(calc)  | ppm    | Start | End | Miss | Ions | Peptide                        |
|-----------|-----------|-----------|--------|-------|-----|------|------|--------------------------------|
| 989.5469  | 988.5396  | 988.4978  | 42.3   | 2     | 10  | 0    | ---  | M.DAVTVYHGK.I                  |
| 1136.5756 | 1135.5683 | 1135.5332 | 30.9   | 1     | 10  | 0    | ---  | -.MDAVTVYHGK.I + Oxidation (M) |
| 1345.6617 | 1344.6544 | 1344.7150 | -45.03 | 2     | 13  | 1    | ---  | M.DAVTVYHGKISR.E               |

**No match to:** 1009.5146, 1122.5945, 1137.5498, 1331.6744, 1351.1476, 1365.7361, 1419.7396, 1910.8976, 1932.9002, 2166.0590, 2167.6396, 2188.0876, 2204.0709, 2216.1287

**7. TSC1\_MOUSE Mass: 129692 Score: 34 Expect: 6.8 Matches: 6**

Hamartin OS=Mus musculus GN=Tsc1 PE=1 SV=1

| Observed  | Mr(expt)  | Mr(calc)  | ppm    | Start | End  | Miss | Ions | Peptide                                   |
|-----------|-----------|-----------|--------|-------|------|------|------|-------------------------------------------|
| 1331.6744 | 1330.6671 | 1330.7278 | -45.62 | 802   | 812  | 1    | ---  | R.NMIAELRVELK.K + Oxidation (M)           |
| 1419.7396 | 1418.7323 | 1418.6797 | 37.1   | 1017  | 1030 | 1    | ---  | R.TSRPGGTRASCGR.V                         |
| 1932.9002 | 1931.8929 | 1931.9622 | -35.87 | 568   | 584  | 1    | ---  | R.DRQTSLETSILTSPCK.I                      |
| 2188.0876 | 2187.0803 | 2187.1569 | -35.00 | 2     | 22   | 0    | ---  | M.AQLANIGELLSMLDSSTLGVR.D                 |
| 2204.0709 | 2203.0636 | 2203.1518 | -40.05 | 2     | 22   | 0    | ---  | M.AQLANIGELLSMLDSSTLGVR.D + Oxidation (M) |
| 2216.1287 | 2215.1214 | 2215.2100 | -39.97 | 848   | 866  | 0    | ---  | R.QLLVLGEVNELYLEQLQSK.H                   |

**No match to:** 989.5469, 1009.5146, 1122.5945, 1136.5756, 1137.5498, 1345.6617, 1351.1476, 1365.7361, 1419.7396, 1910.8976, 2166.0590, 2167.6396

**8. K1C17\_MOUSE Mass: 48417 Score: 34 Expect: 6.9 Matches: 4**

Keratin, type I cytoskeletal 17 OS=Mus musculus GN=Krt17 PE=1 SV=3

| Observed  | Mr(expt)  | Mr(calc)  | ppm    | Start | End | Miss | Ions | Peptide                                |
|-----------|-----------|-----------|--------|-------|-----|------|------|----------------------------------------|
| 989.5469  | 988.5396  | 988.5301  | 9.61   | 298   | 305 | 1    | ---  | K.SEISELRR.T                           |
| 1122.5945 | 1121.5872 | 1121.5717 | 13.9   | 377   | 385 | 0    | ---  | R.LEQEIATYR.R                          |
| 1345.6617 | 1344.6544 | 1344.6772 | -16.95 | 104   | 115 | 0    | ---  | R.ALEEANTELEVK.I                       |
| 2166.0590 | 2165.0517 | 2165.0925 | -18.85 | 202   | 219 | 1    | ---  | R.ADLEMQIENLKEELAYLK.K + Oxidation (M) |

**No match to:** 1009.5146, 1136.5756, 1137.5498, 1331.6744, 1351.1476, 1365.7361, 1419.7396, 1910.8976, 1932.9002, 2167.6396, 2188.0876, 2204.0709, 2216.1287

**9. SPEF2\_MOUSE Mass: 199477 Score: 33 Expect: 8.1 Matches: 6**

Sperm flagellar protein 2 OS=Mus musculus GN=Spef2 PE=2 SV=2

| Observed | Mr(expt) | Mr(calc) | ppm  | Start | End | Miss | Ions | Peptide      |
|----------|----------|----------|------|-------|-----|------|------|--------------|
| 989.5469 | 988.5396 | 988.5124 | 27.6 | 145   | 152 | 1    | ---  | R.RQNEIMAK.I |

1136.5756 1135.5683 1135.6125 -38.86 669 - 678 0 --- K.LLEEALTGYK.R  
 1365.7361 1364.7288 1364.6877 30.1 1519 - 1528 0 4 R.QEHLIEFFFR.L  
 1419.7396 1418.7323 1418.7518 -13.68 337 - 348 1 --- K.QAKIDFAEQTLR.E  
 2204.0709 2203.0636 2203.0513 5.55 256 - 273 1 --- R.RLLMDQLMAHEAQEEAYR.E  
 2216.1287 2215.1214 2215.0909 13.8 1658 - 1676 1 --- K.SENIYAENFIKTFQDLGAR.N

**No match to:** 1009.5146, 1122.5945, 1137.5498, 1331.6744, 1345.6617, 1351.1476, 1910.8976, 1932.9002, 2166.0590, 2167.6396, 2188.0876

**10. IFIT2\_MOUSE** Mass: 55784 Score: 31 Expect: 12 Matches: 4

Interferon-induced protein with tetratricopeptide repeats 2 OS=Mus musculus GN=Ifit2 PE=2 SV=1

**Observed Mr(expt) Mr(calc) ppm Start End Miss Ions Peptide**

1122.5945 1121.5872 1121.5903 -2.74 159 - 167 1 --- K.VCFQKALEK.D  
 1137.5498 1136.5425 1136.5873 -39.38 290 - 298 1 --- R.SKVVHMLNR.R + Oxidation (M)  
 2166.0590 2165.0517 2165.0424 4.29 329 - 346 0 --- K.EMLEYSFLADLYIIAK.K  
 2216.1287 2215.1214 2215.1783 -25.67 219 - 238 1 --- K.LDAVHVHKNQAMALVEEALK.K

**No match to:** 989.5469, 1009.5146, 1136.5756, 1331.6744, 1345.6617, 1351.1476, 1365.7361, 1419.7396, 1910.8976, 1932.9002, 2167.6396, 2188.0876, 2204.0709

**Search Parameters**

Type of search : MS/MS Ion Search

Enzyme : Trypsin

Fixed modifications : Carbamidomethyl (C)

Variable modifications : Oxidation (M)

Mass values : Monoisotopic

Protein Mass : Unrestricted

Peptide Mass Tolerance : ±50 ppm

Fragment Mass Tolerance: ±0.6 Da

Max Missed Cleavages : 1

Instrument type : MALDI-TOF-TOF

Query1 (989.5469,1+) : <no title>

Query2 (1009.5146,1+) : <no title>

Query3 (1122.5945,1+) : <no title>

Query4 (1136.5756,1+) : <no title>

Query5 (1137.5498,1+) : <no title>

Query6 (1331.6744,1+) : <no title>

Query7 (1345.6617,1+) : <no title>

Query8 (1351.1476,1+) : <no title>

Query9 (1365.7361,1+) : <no title>

Query10 (1419.7396,1+) : <no title>

Query11 (1910.8976,1+) : <no title>

Query12 (1932.9002,1+) : <no title>

Query13 (2166.0590,1+) : <no title>

Query14 (2167.6396,1+) : <no title>

Query15 (2188.0876,1+) : <no title>

Query16 (2204.0709,1+) : <no title>

Query17 (2216.1287,1+) : <no title>

**Mascot:** <http://www.matrixscience.com/>

# **MASCOT** Mascot Search Results **SCIENCE**

User :  
Email :  
Search title : Auto submitted by BioTools  
Database : SwissProt 57.15 (515203 sequences; 181334896 residues)  
Taxonomy : Mus. (16281 sequences)  
Timestamp : 22 Nov 2013 at 05:05:43 GMT  
Warning : A Peptide summary report will usually give a much clearer picture of MS/MS search results.  
Top Score : 165 for EZRI\_MOUSE, Ezrin OS=Mus musculus GN=Ezr PE=1 SV=3

## Mascot Score Histogram

Protein score is  $-10 \cdot \log(P)$ , where P is the probability that the observed match is a random event.

Protein scores greater than 55 are significant ( $p < 0.05$ ).

Protein scores are derived from ions scores as a non-probabilistic basis for ranking protein hits.

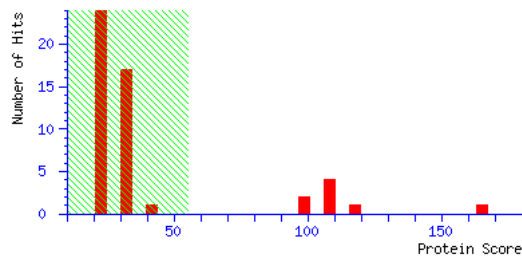

## Protein Summary Report

### Index

| Accession                       | Mass   | Score | Description                                                           |
|---------------------------------|--------|-------|-----------------------------------------------------------------------|
| 1. <a href="#">EZRI_MOUSE</a>   | 69478  | 165   | Ezrin OS=Mus musculus GN=Ezr PE=1 SV=3                                |
| 2. <a href="#">ACTS_MOUSE</a>   | 42366  | 120   | Actin, alpha skeletal muscle OS=Mus musculus GN=Acta1 PE=1 SV=1       |
| 3. <a href="#">ACTB_MOUSE</a>   | 42052  | 109   | Actin, cytoplasmic 1 OS=Mus musculus GN=Actb PE=1 SV=1                |
| 4. <a href="#">ACTG_MOUSE</a>   | 42108  | 109   | Actin, cytoplasmic 2 OS=Mus musculus GN=Actg1 PE=1 SV=1               |
| 5. <a href="#">ACTA_MOUSE</a>   | 42381  | 109   | Actin, aortic smooth muscle OS=Mus musculus GN=Acta2 PE=1 SV=1        |
| 6. <a href="#">ACTC_MOUSE</a>   | 42334  | 109   | Actin, alpha cardiac muscle 1 OS=Mus musculus GN=Actc1 PE=1 SV=1      |
| 7. <a href="#">ACTBL_MOUSE</a>  | 42319  | 101   | Beta-actin-like protein 2 OS=Mus musculus GN=Actbl2 PE=2 SV=1         |
| 8. <a href="#">ACTH_MOUSE</a>   | 42249  | 101   | Actin, gamma-enteric smooth muscle OS=Mus musculus GN=Actg2 PE=2 SV=1 |
| 9. <a href="#">YB019_MOUSE</a>  | 193930 | 43    | Uncharacterized protein FLJ44048 homolog OS=Mus musculus PE=1 SV=2    |
| 10. <a href="#">WDR67_MOUSE</a> | 116563 | 36    | WD repeat-containing protein 67 OS=Mus musculus GN=Wdr67 PE=2 SV=1    |

## Results List

1. [EZRI\\_MOUSE](#) Mass: 69478 Score: 165 Expect: 5.1e-013 Matches: 8



Ezrin OS=Mus musculus GN=Ezr PE=1 SV=3

| Observed  | Mr(expt)  | Mr(calc)  | ppm    | Start | End | Miss | Ions | Peptide                         |
|-----------|-----------|-----------|--------|-------|-----|------|------|---------------------------------|
| 816.4523  | 815.4451  | 815.4389  | 7.58   | 231   | -   | 237  | 1 -- | K.DDKLTPK.I                     |
| 1089.5406 | 1088.5334 | 1088.5462 | -11.76 | 518   | -   | 526  | 1 20 | R.IIEAEKNER.V                   |
| 1138.5084 | 1137.5011 | 1137.5124 | -9.97  | 578   | -   | 586  | 1 -- | K.QRIDEFEAM.-                   |
| 1154.4972 | 1153.4899 | 1153.5074 | -15.14 | 578   | -   | 586  | 1 -- | K.QRIDEFEAM.- + Oxidation (M)   |
| 1303.6651 | 1302.6579 | 1302.6667 | -6.75  | 361   | -   | 371  | 1 -- | R.AEKELSEQIEK.A                 |
| 1472.7903 | 1471.7830 | 1471.7994 | -11.16 | 530   | -   | 542  | 0 63 | R.QLLTLSNELSQAR.D               |
| 1493.6772 | 1492.6700 | 1492.6841 | -9.46  | 548   | -   | 559  | 0 61 | R.THNDIHNENMR.Q                 |
| 1509.6830 | 1508.6758 | 1508.6790 | -2.15  | 548   | -   | 559  | 0 -- | R.THNDIHNENMR.Q + Oxidation (M) |

**No match to:** 856.5109, 863.4077, 901.4877, 905.4367, 919.4593, 923.5634, 1000.4515, 1245.6469, 1425.6241, 1454.8196, 1455.7877, 1487.6950, 1500.7159, 1507.6865, 1516.6822, 1524.6759, 1531.6647, 1537.6935, 1681.9647, 1702.8261, 1790.8737, 1804.8876, 1891.8577, 1981.9633, 2047.9647, 2246.0753

2. ACTS\_MOUSE Mass: 42366 Score: 120 Expect: 1.6e-008 Matches: 5

Actin, alpha skeletal muscle OS=Mus musculus GN=Acta1 PE=1 SV=1

| Observed  | Mr(expt)  | Mr(calc)  | ppm    | Start | End | Miss | Ions | Peptide                   |
|-----------|-----------|-----------|--------|-------|-----|------|------|---------------------------|
| 919.4593  | 918.4520  | 918.4593  | -7.93  | 287   | -   | 293  | 1 -- | K.CDIDIRK.D               |
| 923.5634  | 922.5562  | 922.5600  | -4.12  | 331   | -   | 338  | 1 -- | K.IIAPPERK.Y              |
| 1500.7159 | 1499.7086 | 1499.7005 | 5.43   | 362   | -   | 374  | 0 -- | K.QEYDEAGPSIVHR.K         |
| 1790.8737 | 1789.8665 | 1789.8846 | -10.15 | 241   | -   | 256  | 0 84 | K.SYELPDGQVITIGNER.F      |
| 2246.0753 | 2245.0680 | 2245.0143 | 23.9   | 294   | -   | 314  | 0 -- | K.DLYANNVMSGGTTMYPGIADR.M |

**No match to:** 816.4523, 856.5109, 863.4077, 901.4877, 905.4367, 1000.4515, 1089.5406, 1138.5084, 1154.4972, 1245.6469, 1303.6651, 1425.6241, 1454.8196, 1455.7877, 1472.7903, 1487.6950, 1493.6772, 1507.6865, 1509.6830, 1516.6822, 1524.6759, 1531.6647, 1537.6935, 1681.9647, 1702.8261, 1804.8876, 1891.8577, 1981.9633, 2047.9647

3. ACTB\_MOUSE Mass: 42052 Score: 109 Expect: 2e-007 Matches: 4

Actin, cytoplasmic 1 OS=Mus musculus GN=Actb PE=1 SV=1

| Observed  | Mr(expt)  | Mr(calc)  | ppm    | Start | End | Miss | Ions | Peptide              |
|-----------|-----------|-----------|--------|-------|-----|------|------|----------------------|
| 905.4367  | 904.4294  | 904.4436  | -15.75 | 285   | -   | 291  | 1 -- | K.CDVDIRK.D          |
| 923.5634  | 922.5562  | 922.5600  | -4.12  | 329   | -   | 336  | 1 -- | K.IIAPPERK.Y         |
| 1516.6822 | 1515.6749 | 1515.6954 | -13.48 | 360   | -   | 372  | 0 -- | K.QEYDESGPSIVHR.K    |
| 1790.8737 | 1789.8665 | 1789.8846 | -10.15 | 239   | -   | 254  | 0 84 | K.SYELPDGQVITIGNER.F |

**No match to:** 816.4523, 856.5109, 863.4077, 901.4877, 919.4593, 1000.4515, 1089.5406, 1138.5084, 1154.4972, 1245.6469, 1303.6651, 1425.6241, 1454.8196, 1455.7877, 1472.7903, 1487.6950, 1493.6772, 1500.7159, 1507.6865, 1509.6830, 1524.6759, 1531.6647, 1537.6935, 1681.9647, 1702.8261, 1804.8876, 1891.8577, 1981.9633, 2047.9647, 2246.0753

4. ACTG\_MOUSE Mass: 42108 Score: 109 Expect: 2e-007 Matches: 4

Actin, cytoplasmic 2 OS=Mus musculus GN=Actg1 PE=1 SV=1

| Observed  | Mr(expt)  | Mr(calc)  | ppm    | Start | End | Miss | Ions | Peptide           |
|-----------|-----------|-----------|--------|-------|-----|------|------|-------------------|
| 905.4367  | 904.4294  | 904.4436  | -15.75 | 285   | -   | 291  | 1 -- | K.CDVDIRK.D       |
| 923.5634  | 922.5562  | 922.5600  | -4.12  | 329   | -   | 336  | 1 -- | K.IIAPPERK.Y      |
| 1516.6822 | 1515.6749 | 1515.6954 | -13.48 | 360   | -   | 372  | 0 -- | K.QEYDESGPSIVHR.K |

1790.8737 1789.8665 1789.8846 -10.15 239 - 254 0 84 K.SYELPDGQVITIGNER.F

**No match to:** 816.4523, 856.5109, 863.4077, 901.4877, 919.4593, 1000.4515, 1089.5406, 1138.5084, 1154.4972, 1245.6469, 1303.6651, 1425.6241, 1454.8196, 1455.7877, 1472.7903, 1487.6950, 1493.6772, 1500.7159, 1507.6865, 1509.6830, 1524.6759, 1531.6647, 1537.6935, 1681.9647, 1702.8261, 1804.8876, 1891.8577, 1981.9633, 2047.9647, 2246.0753

5. ACTA\_MOUSE **Mass:** 42381 **Score:** 109 **Expect:** 2e-007 **Matches:** 4

Actin, aortic smooth muscle OS=Mus musculus GN=Acta2 PE=1 SV=1

**Observed Mr(expt) Mr(calc) ppm Start End Miss Ions Peptide**

919.4593 918.4520 918.4593 -7.93 287 - 293 1 --- K.CDIDIRK.D

923.5634 922.5562 922.5600 -4.12 331 - 338 1 --- K.IIAPPERK.Y

1500.7159 1499.7086 1499.7005 5.43 362 - 374 0 --- K.QEYDEAGPSIVHR.K

1790.8737 1789.8665 1789.8846 -10.15 241 - 256 0 84 K.SYELPDGQVITIGNER.F

**No match to:** 816.4523, 856.5109, 863.4077, 901.4877, 905.4367, 1000.4515, 1089.5406, 1138.5084, 1154.4972, 1245.6469, 1303.6651, 1425.6241, 1454.8196, 1455.7877, 1472.7903, 1487.6950, 1493.6772, 1507.6865, 1509.6830, 1516.6822, 1524.6759, 1531.6647, 1537.6935, 1681.9647, 1702.8261, 1804.8876, 1891.8577, 1981.9633, 2047.9647, 2246.0753

6. ACTC\_MOUSE **Mass:** 42334 **Score:** 109 **Expect:** 2e-007 **Matches:** 4

Actin, alpha cardiac muscle 1 OS=Mus musculus GN=Actc1 PE=1 SV=1

**Observed Mr(expt) Mr(calc) ppm Start End Miss Ions Peptide**

919.4593 918.4520 918.4593 -7.93 287 - 293 1 --- K.CDIDIRK.D

923.5634 922.5562 922.5600 -4.12 331 - 338 1 --- K.IIAPPERK.Y

1500.7159 1499.7086 1499.7005 5.43 362 - 374 0 --- K.QEYDEAGPSIVHR.K

1790.8737 1789.8665 1789.8846 -10.15 241 - 256 0 84 K.SYELPDGQVITIGNER.F

**No match to:** 816.4523, 856.5109, 863.4077, 901.4877, 905.4367, 1000.4515, 1089.5406, 1138.5084, 1154.4972, 1245.6469, 1303.6651, 1425.6241, 1454.8196, 1455.7877, 1472.7903, 1487.6950, 1493.6772, 1507.6865, 1509.6830, 1516.6822, 1524.6759, 1531.6647, 1537.6935, 1681.9647, 1702.8261, 1804.8876, 1891.8577, 1981.9633, 2047.9647, 2246.0753

7. ACTBL\_MOUSE **Mass:** 42319 **Score:** 101 **Expect:** 1.3e-006 **Matches:** 3

Beta-actin-like protein 2 OS=Mus musculus GN=Actbl2 PE=2 SV=1

**Observed Mr(expt) Mr(calc) ppm Start End Miss Ions Peptide**

905.4367 904.4294 904.4436 -15.75 286 - 292 1 --- K.CDVDIRK.D

923.5634 922.5562 922.5600 -4.12 330 - 337 1 --- K.IIAPPERK.Y

1790.8737 1789.8665 1789.8846 -10.15 240 - 255 0 84 R.SYELPDGQVITIGNER.F

**No match to:** 816.4523, 856.5109, 863.4077, 901.4877, 919.4593, 1000.4515, 1089.5406, 1138.5084, 1154.4972, 1245.6469, 1303.6651, 1425.6241, 1454.8196, 1455.7877, 1472.7903, 1487.6950, 1493.6772, 1500.7159, 1507.6865, 1509.6830, 1516.6822, 1524.6759, 1531.6647, 1537.6935, 1681.9647, 1702.8261, 1804.8876, 1891.8577, 1981.9633, 2047.9647, 2246.0753

8. ACTH\_MOUSE **Mass:** 42249 **Score:** 101 **Expect:** 1.3e-006 **Matches:** 3

Actin, gamma-enteric smooth muscle OS=Mus musculus GN=Actg2 PE=2 SV=1

**Observed Mr(expt) Mr(calc) ppm Start End Miss Ions Peptide**

919.4593 918.4520 918.4593 -7.93 286 - 292 1 --- K.CDIDIRK.D

923.5634 922.5562 922.5600 -4.12 330 - 337 1 --- K.IIAPPERK.Y

1790.8737 1789.8665 1789.8846 -10.15 240 - 255 0 84 K.SYELPDGQVITIGNER.F

**No match to:** 816.4523, 856.5109, 863.4077, 901.4877, 905.4367, 1000.4515, 1089.5406, 1138.5084, 1154.4972, 1245.6469, 1303.6651, 1425.6241, 1454.8196, 1455.7877, 1472.7903, 1487.6950, 1493.6772, 1500.7159, 1507.6865, 1509.6830, 1516.6822, 1524.6759, 1531.6647, 1537.6935, 1681.9647, 1702.8261, 1804.8876, 1891.8577, 1981.9633, 2047.9647, 2246.0753

**9. YB019\_MOUSE Mass: 193930 Score: 43 Expect: 0.82 Matches: 11**

Uncharacterized protein FLJ44048 homolog OS=Mus musculus PE=1 SV=2

| Observed  | Mr(expt)  | Mr(calc)  | ppm    | Start | End | Miss | Ions | Peptide                                      |
|-----------|-----------|-----------|--------|-------|-----|------|------|----------------------------------------------|
| 901.4877  | 900.4804  | 900.5029  | -24.90 | 205   | -   | 212  | 0    | --- K.QNQLALSK.I                             |
| 1000.4515 | 999.4443  | 999.4444  | -0.11  | 1701  | -   | 1708 | 0    | --- K.EHVSEMPR.S + Oxidation (M)             |
| 1138.5084 | 1137.5011 | 1137.5527 | -45.34 | 1740  | -   | 1749 | 1    | --- K.SSSPPHQDKR.-                           |
| 1454.8196 | 1453.8123 | 1453.8042 | 5.62   | 19    | -   | 33   | 1    | --- K.LPHFGGASVVAKSGK.E                      |
| 1493.6772 | 1492.6700 | 1492.6828 | -8.59  | 1421  | -   | 1435 | 0    | --- R.GIGPSSTDVSEMGR.Q                       |
| 1507.6865 | 1506.6792 | 1506.6620 | 11.4   | 1342  | -   | 1355 | 1    | --- K.HAALMSSSDSKDKS.K + Oxidation (M)       |
| 1509.6830 | 1508.6758 | 1508.6777 | -1.29  | 1421  | -   | 1435 | 0    | --- R.GIGPSSTDVSEMGR.Q + Oxidation (M)       |
| 1790.8737 | 1789.8665 | 1789.8768 | -5.76  | 219   | -   | 234  | 0    | --- K.DDTQDPILNSIATIMK.S + Oxidation (M)     |
| 1891.8577 | 1890.8504 | 1890.9105 | -31.78 | 389   | -   | 406  | 1    | --- R.GAQVQESSTSPPTMKSR.G                    |
| 2047.9647 | 2046.9574 | 2046.9463 | 5.45   | 368   | -   | 386  | 1    | --- K.ESRGAQVQQSAMSPPSMK.D + 2 Oxidation (M) |
| 2246.0753 | 2245.0680 | 2245.1121 | -19.63 | 279   | -   | 299  | 1    | --- K.SQGSQVQLATSPPTSMKSR.I                  |

**No match to:** 816.4523, 856.5109, 863.4077, 905.4367, 919.4593, 923.5634, 1089.5406, 1154.4972, 1245.6469, 1303.6651, 1425.6241, 1455.7877, 1472.7903, 1487.6950, 1500.7159, 1516.6822, 1524.6759, 1531.6647, 1537.6935, 1681.9647, 1702.8261, 1804.8876, 1981.9633

**10. WDR67\_MOUSE Mass: 116563 Score: 36 Expect: 4.4 Matches: 8**

WD repeat-containing protein 67 OS=Mus musculus GN=Wdr67 PE=2 SV=1

| Observed  | Mr(expt)  | Mr(calc)  | ppm    | Start | End | Miss | Ions | Peptide                                  |
|-----------|-----------|-----------|--------|-------|-----|------|------|------------------------------------------|
| 816.4523  | 815.4451  | 815.4575  | -15.25 | 251   | -   | 257  | 0    | --- R.IIQMPAK.V + Oxidation (M)          |
| 919.4593  | 918.4520  | 918.4447  | 8.00   | 881   | -   | 887  | 1    | --- R.WKEAEEK.E                          |
| 1138.5084 | 1137.5011 | 1137.5454 | -38.98 | 721   | -   | 729  | 1    | --- R.AKDEAWYQK.Q                        |
| 1455.7877 | 1454.7804 | 1454.7657 | 10.2   | 97    | -   | 109  | 0    | --- K.SEFLVALADYSIK.C                    |
| 1472.7903 | 1471.7830 | 1471.7882 | -3.54  | 390   | -   | 402  | 1    | --- R.VLKQDLTGDLLENK.E                   |
| 1702.8261 | 1701.8188 | 1701.8785 | -35.06 | 352   | -   | 367  | 0    | --- K.VIEDLPSNTVSSNLK.M                  |
| 1891.8577 | 1890.8504 | 1890.8741 | -12.53 | 707   | -   | 722  | 1    | --- R.QTVENMQAEVDEQRAK.D + Oxidation (M) |
| 2246.0753 | 2245.0680 | 2245.0710 | -1.31  | 393   | -   | 412  | 1    | --- K.QDLTGDLLENKENELSEGLNK.K            |

**No match to:** 856.5109, 863.4077, 901.4877, 905.4367, 923.5634, 1000.4515, 1089.5406, 1154.4972, 1245.6469, 1303.6651, 1425.6241, 1454.8196, 1487.6950, 1493.6772, 1500.7159, 1507.6865, 1509.6830, 1516.6822, 1524.6759, 1531.6647, 1537.6935, 1681.9647, 1790.8737, 1804.8876, 1981.9633, 2047.9647

**Search Parameters**

**Type of search** : MS/MS Ion Search  
**Enzyme** : Trypsin  
**Fixed modifications** : Carbamidomethyl (C)  
**Variable modifications** : Oxidation (M)  
**Mass values** : Monoisotopic  
**Protein Mass** : Unrestricted

Peptide Mass Tolerance :  $\pm 50$  ppm

Fragment Mass Tolerance:  $\pm 0.6$  Da

Max Missed Cleavages : 1

Instrument type : MALDI-TOF-TOF

Query1 (816.4523,1+) : <no title>

Query2 (856.5109,1+) : <no title>

Query3 (863.4077,1+) : <no title>

Query4 (901.4877,1+) : <no title>

Query5 (905.4367,1+) : <no title>

Query6 (919.4593,1+) : <no title>

Query7 (923.5634,1+) : <no title>

Query8 (1000.4515,1+) : <no title>

Query9 (1089.5406,1+) : <no title>

Query10 (1138.5084,1+) : <no title>

Query11 (1154.4972,1+) : <no title>

Query12 (1245.6469,1+) : <no title>

Query13 (1303.6651,1+) : <no title>

Query14 (1425.6241,1+) : <no title>

Query15 (1454.8196,1+) : <no title>

Query16 (1455.7877,1+) : <no title>

Query17 (1472.7903,1+) : <no title>

Query18 (1487.6950,1+) : <no title>

Query19 (1493.6772,1+) : <no title>

Query20 (1500.7159,1+) : <no title>

Query21 (1507.6865,1+) : <no title>

Query22 (1509.6830,1+) : <no title>

Query23 (1516.6822,1+) : <no title>

Query24 (1524.6759,1+) : <no title>

Query25 (1531.6647,1+) : <no title>

Query26 (1537.6935,1+) : <no title>

Query27 (1681.9647,1+) : <no title>

Query28 (1702.8261,1+) : <no title>

Query29 (1790.8737,1+) : <no title>

Query30 (1804.8876,1+) : <no title>

Query31 (1891.8577,1+) : <no title>

Query32 (1981.9633,1+) : <no title>

Query33 (2047.9647,1+) : <no title>

Query34 (2246.0753,1+) : <no title>

**Mascot:** <http://www.matrixscience.com/>

# **MASCOT** Mascot Search Results

**User** :  
**Email** :  
**Search title** : Auto submitted by BioTools  
**Database** : SwissProt 57.15 (515203 sequences; 181334896 residues)  
**Taxonomy** : Mus musculus (house mouse) (16230 sequences)  
**Timestamp** : 5 Nov 2013 at 04:50:02 GMT  
**Warning** : A Peptide summary report will usually give a much clearer picture of MS/MS search results.  
**Top Score** : 105 for HNRPK\_MOUSE, Heterogeneous nuclear ribonucleoprotein K OS=Mus musculus GN=Hnrpk PE=1 SV=1

## Mascot Score Histogram

Protein score is  $-10 \cdot \log(P)$ , where P is the probability that the observed match is a random event.

Protein scores greater than 55 are significant ( $p < 0.05$ ).

Protein scores are derived from ions scores as a non-probabilistic basis for ranking protein hits.

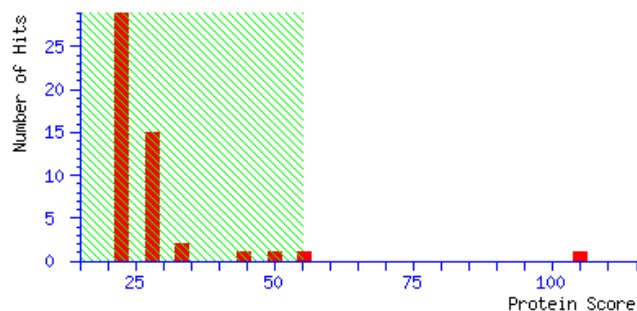

## Protein Summary Report

### Index

| Accession             | Mass   | Score | Description                                                                     |
|-----------------------|--------|-------|---------------------------------------------------------------------------------|
| 1. <u>HNRPK_MOUSE</u> | 51230  | 105   | Heterogeneous nuclear ribonucleoprotein K OS=Mus musculus GN=Hnrpk PE=1 SV=1    |
| 2. <u>VATA_MOUSE</u>  | 68625  | 58    | V-type proton ATPase catalytic subunit A OS=Mus musculus GN=Atp6v1a PE=1 SV=2   |
| 3. <u>NR2E3_MOUSE</u> | 43947  | 48    | Photoreceptor-specific nuclear receptor OS=Mus musculus GN=Nr2e3 PE=1 SV=1      |
| 4. <u>ACBD7_MOUSE</u> | 10092  | 47    | Acyl-CoA-binding domain-containing protein 7 OS=Mus musculus GN=Acbd7 PE=2 SV=1 |
| 5. <u>ANR46_MOUSE</u> | 25435  | 36    | Ankyrin repeat domain-containing protein 46 OS=Mus musculus GN=Ankr46 PE=2 SV=1 |
| 6. <u>NXT1_MOUSE</u>  | 16065  | 31    | NTF2-related export protein 1 OS=Mus musculus GN=Nxt1 PE=1 SV=2                 |
| 7. <u>ACTN1_MOUSE</u> | 103631 | 30    | Alpha-actinin-1 OS=Mus musculus GN=Actn1 PE=2 SV=1                              |
| 8. <u>ALBU_MOUSE</u>  | 70700  | 30    | Serum albumin OS=Mus musculus GN=Alb PE=1 SV=3                                  |
| 9. <u>MK15_MOUSE</u>  | 61040  | 30    | Mitogen-activated protein kinase 15 OS=Mus musculus GN=Mapk15 PE=1 SV=1         |
| 10. <u>EDF1_MOUSE</u> | 16359  | 29    | Endothelial differentiation-related factor 1 OS=Mus musculus GN=Edf1 PE=1 SV=1  |

## Results List

1. HNRPK\_MOUSE Mass: 51230 Score: 105 Expect: 5.1e-007 Matches: 6

Heterogeneous nuclear ribonucleoprotein K OS=Mus musculus GN=Hnmpk PE=1 SV=1

| Observed  | Mr(expt)  | Mr(calc)  | ppm   | Start | End | Miss | Ions | Peptide                  |
|-----------|-----------|-----------|-------|-------|-----|------|------|--------------------------|
| 1053.6335 | 1052.6262 | 1052.6342 | -7.65 | 192   | -   | 201  | 0    | --- R.VVLIGGKPD.R.V      |
| 1098.4611 | 1097.4538 | 1097.4448 | 8.21  | 140   | -   | 148  | 0    | 26 K.GSDFDCELR.L         |
| 1194.6953 | 1193.6880 | 1193.6921 | -3.38 | 306   | -   | 316  | 0    | 27 R.NLPLPPPPPP.R.G      |
| 1549.6584 | 1548.6511 | 1548.6450 | 3.97  | 180   | -   | 191  | 0    | 11 K.LFQECCHSTDR.V       |
| 1735.8306 | 1734.8233 | 1734.7995 | 13.7  | 22    | -   | 35   | 1    | --- K.RPAEDMEEEQAFKR.S   |
| 1780.8137 | 1779.8065 | 1779.7911 | 8.62  | 70    | -   | 86   | 0    | --- R.TDYNASVSPDSSGPER.I |

No match to: 856.4939, 885.4522, 938.5014, 1206.6763, 1284.7246, 1296.6643, 1308.7093, 1316.7441, 1439.7765, 1479.7824, 1531.7724, 1542.7956, 1563.7825, 1589.7406, 1602.7672, 1609.7890, 1694.8383, 1710.8990, 1731.8218, 1749.8450, 1770.8924, 1790.9055, 1882.9347, 2087.0152, 2143.0538, 2247.1067

2. VATA\_MOUSE Mass: 68625 Score: 58 Expect: 0.029 Matches: 8

V-type proton ATPase catalytic subunit A OS=Mus musculus GN=Atp6v1a PE=1 SV=2

| Observed  | Mr(expt)  | Mr(calc)  | ppm    | Start | End | Miss | Ions | Peptide                                |
|-----------|-----------|-----------|--------|-------|-----|------|------|----------------------------------------|
| 856.4939  | 855.4866  | 855.4524  | 40.0   | 581   | -   | 587  | 1    | --- K.LSSMKFK.D + Oxidation (M)        |
| 885.4522  | 884.4449  | 884.4392  | 6.50   | 382   | -   | 388  | 0    | --- R.LASFYER.A                        |
| 1308.7093 | 1307.7021 | 1307.7197 | -13.52 | 45    | -   | 56   | 0    | --- R.VGHSELVGEIIR.L                   |
| 1316.7441 | 1315.7368 | 1315.7361 | 0.57   | 221   | -   | 232  | 0    | --- K.LPANHPLLTGQR.V                   |
| 1531.7724 | 1530.7651 | 1530.7824 | -11.29 | 309   | -   | 323  | 0    | --- R.TALVANTSNPVAAR.E + Oxidation (M) |
| 1731.8218 | 1730.8145 | 1730.7934 | 12.2   | 266   | -   | 280  | 0    | --- K.YNSDVIIVVCGGER.G                 |
| 1749.8450 | 1748.8377 | 1748.8621 | -13.96 | 324   | -   | 338  | 0    | --- R.EASIYTGITLSEYFR.D                |
| 2143.0538 | 2142.0465 | 2142.0422 | 2.01   | 460   | -   | 476  | 1    | --- R.ALDEYYDKHFTEFVPLR.T              |

No match to: 938.5014, 1053.6335, 1098.4611, 1194.6953, 1206.6763, 1284.7246, 1296.6643, 1439.7765, 1479.7824, 1542.7956, 1549.6584, 1563.7825, 1589.7406, 1602.7672, 1609.7890, 1694.8383, 1710.8990, 1735.8306, 1770.8924, 1780.8137, 1790.9055, 1882.9347, 2087.0152, 2247.1067

3. NR2E3\_MOUSE Mass: 43947 Score: 48 Expect: 0.23 Matches: 6

Photoreceptor-specific nuclear receptor OS=Mus musculus GN=Nr2e3 PE=1 SV=1

| Observed  | Mr(expt)  | Mr(calc)  | ppm    | Start | End | Miss | Ions | Peptide                                  |
|-----------|-----------|-----------|--------|-------|-----|------|------|------------------------------------------|
| 1206.6763 | 1205.6690 | 1205.6994 | -25.23 | 214   | -   | 223  | 1    | --- R.LLFMAVKWAK.N                       |
| 1296.6643 | 1295.6570 | 1295.6986 | -32.12 | 287   | -   | 296  | 1    | --- R.FLQETISRFR.A                       |
| 1609.7890 | 1608.7817 | 1608.8029 | -13.14 | 2     | -   | 18   | 0    | --- M.SSTVAASTMPVSVASK.K + Oxidation (M) |
| 1749.8450 | 1748.8377 | 1748.7570 | 46.1   | 101   | -   | 115  | 0    | --- K.CLQAGMNQDAVQNER.Q + Oxidation (M)  |
| 1780.8137 | 1779.8065 | 1779.7498 | 31.9   | 51    | -   | 65   | 0    | --- K.HYGIYACNGCSGFFK.R                  |
| 1882.9347 | 1881.9274 | 1881.8900 | 19.9   | 72    | -   | 87   | 1    | --- R.LIYRCQVAGMCPVDK.A + Oxidation (M)  |

No match to: 856.4939, 885.4522, 938.5014, 1053.6335, 1098.4611, 1194.6953, 1284.7246, 1308.7093, 1316.7441, 1439.7765, 1479.7824, 1531.7724, 1542.7956, 1549.6584, 1563.7825, 1589.7406, 1602.7672, 1694.8383, 1710.8990, 1731.8218, 1735.8306, 1770.8924, 1790.9055, 2087.0152, 2143.0538, 2247.1067

4. ACBD7\_MOUSE Mass: 10092 Score: 47 Expect: 0.36 Matches: 4

Acyl-CoA-binding domain-containing protein 7 OS=Mus musculus GN=Acbd7 PE=2 SV=1

**Observed Mr(expt) Mr(calc) ppm Start End Miss Ions Peptide**

885.4522 884.4449 884.4643 -21.93 28 - 34 0 -- K.ELYGLYK.Q  
1563.7825 1562.7752 1562.7325 27.3 2 - 15 0 -- M.SLQADFDQAAQDVR.K  
1694.8383 1693.8310 1693.7730 34.3 1 - 15 0 -- -.MSLQADFDQAAQDVR.K  
2143.0538 2142.0465 2142.1177 -33.23 35 - 54 1 -- K.QSVIGDINIACPAMLDLKGK.A

**No match to:** 856.4939, 938.5014, 1053.6335, 1098.4611, 1194.6953, 1206.6763, 1284.7246, 1296.6643, 1308.7093, 1316.7441, 1439.7765, 1479.7824, 1531.7724, 1542.7956, 1549.6584, 1589.7406, 1602.7672, 1609.7890, 1710.8990, 1731.8218, 1735.8306, 1749.8450, 1770.8924, 1780.8137, 1790.9055, 1882.9347, 2087.0152, 2247.1067

**5. ANR46\_MOUSE Mass: 25435 Score: 36 Expect: 4.2 Matches: 4**

Ankyrin repeat domain-containing protein 46 OS=Mus musculus GN=Ankr46 PE=2 SV=1

**Observed Mr(expt) Mr(calc) ppm Start End Miss Ions Peptide**

1296.6643 1295.6570 1295.6656 -6.65 56 - 66 0 -- R.GNVDICQLLHK.F  
1316.7441 1315.7368 1315.6871 37.8 127 - 137 0 -- R.LLESLEEQEVK.G  
1749.8450 1748.8377 1748.9243 -49.55 101 - 116 0 -- K.IDICNHQGATPLVLAK.R  
1790.9055 1789.8982 1789.9210 -12.71 127 - 141 1 -- R.LLESLEEQEVKGFNR.G

**No match to:** 856.4939, 885.4522, 938.5014, 1053.6335, 1098.4611, 1194.6953, 1206.6763, 1284.7246, 1308.7093, 1439.7765, 1479.7824, 1531.7724, 1542.7956, 1549.6584, 1563.7825, 1589.7406, 1602.7672, 1609.7890, 1694.8383, 1710.8990, 1731.8218, 1735.8306, 1770.8924, 1780.8137, 1882.9347, 2087.0152, 2143.0538, 2247.1067

**6. NXT1\_MOUSE Mass: 16065 Score: 31 Expect: 13 Matches: 3**

NTF2-related export protein 1 OS=Mus musculus GN=Nxt1 PE=1 SV=2

**Observed Mr(expt) Mr(calc) ppm Start End Miss Ions Peptide**

1602.7672 1601.7599 1601.6933 41.6 128 - 140 1 -- K.IASDCFRFQDWAS.-  
1780.8137 1779.8065 1779.8025 2.21 16 - 30 0 -- R.AAEFVNVVYTTMDK.R  
1790.9055 1789.8982 1789.8127 47.8 1 - 15 1 -- -.MASVDFKTYVDQACR.A

**No match to:** 856.4939, 885.4522, 938.5014, 1053.6335, 1098.4611, 1194.6953, 1206.6763, 1284.7246, 1296.6643, 1308.7093, 1316.7441, 1439.7765, 1479.7824, 1531.7724, 1542.7956, 1549.6584, 1563.7825, 1589.7406, 1609.7890, 1694.8383, 1710.8990, 1731.8218, 1735.8306, 1749.8450, 1770.8924, 1882.9347, 2087.0152, 2143.0538, 2247.1067

**7. ACTN1\_MOUSE Mass: 103631 Score: 30 Expect: 16 Matches: 6**

Alpha-actinin-1 OS=Mus musculus GN=Actn1 PE=2 SV=1

**Observed Mr(expt) Mr(calc) ppm Start End Miss Ions Peptide**

1308.7093 1307.7021 1307.6469 42.1 841 - 850 1 -- K.NYTEDELRR.E  
1479.7824 1478.7751 1478.7989 -16.08 122 - 133 0 -- K.MTLGMIWTIILR.F + 2 Oxidation (M)  
1542.7956 1541.7883 1541.8301 -27.08 107 - 121 0 -- K.LVSIGAEIVDGNVK.M  
1694.8383 1693.8310 1693.9138 -48.86 421 - 435 1 -- K.DYETATLSEIKALLK.K  
1749.8450 1748.8377 1748.8944 -32.46 835 - 849 1 -- K.ILAGDKNYTEDELRR  
1790.9055 1789.8982 1789.8483 27.9 199 - 214 0 -- K.DDPLTNLNTAFDVAER.F

**No match to:** 856.4939, 885.4522, 938.5014, 1053.6335, 1098.4611, 1194.6953, 1206.6763, 1284.7246, 1296.6643, 1316.7441, 1439.7765, 1531.7724, 1549.6584, 1563.7825, 1589.7406, 1602.7672, 1609.7890, 1710.8990, 1731.8218, 1735.8306, 1770.8924, 1780.8137, 1882.9347, 2087.0152, 2143.0538, 2247.1067

8. ALBU\_MOUSE Mass: 70700 Score: 30 Expect: 17 Matches: 5

Serum albumin OS=Mus musculus GN=Alb PE=1 SV=3

**Observed Mr(expt) Mr(calc) ppm Start End Miss Ions Peptide**

1439.7765 1438.7692 1438.7780 -6.10 439 - 452 0 --- K.APQVSTPTLVEAAR.N

1479.7824 1478.7751 1478.7881 -8.79 422 - 434 0 --- K.LGEYGFQNAILVR.Y

1563.7825 1562.7752 1562.7181 36.5 457 - 469 1 --- R.VGFKCCTLPEDQR.L

1609.7890 1608.7817 1608.7824 -0.41 348 - 360 0 --- K.DVFLGTFLYEYSR.R

1882.9347 1881.9274 1881.9295 -1.10 509 - 524 0 --- R.RPCFSALTVDETYVPK.E

**No match to:** 856.4939, 885.4522, 938.5014, 1053.6335, 1098.4611, 1194.6953, 1206.6763, 1284.7246, 1296.6643, 1308.7093, 1316.7441, 1531.7724, 1542.7956, 1549.6584, 1589.7406, 1602.7672, 1694.8383, 1710.8990, 1731.8218, 1735.8306, 1749.8450, 1770.8924, 1780.8137, 1790.9055, 2087.0152, 2143.0538, 2247.1067

9. MK15\_MOUSE Mass: 61040 Score: 30 Expect: 17 Matches: 5

Mitogen-activated protein kinase 15 OS=Mus musculus GN=Mapk15 PE=1 SV=1

**Observed Mr(expt) Mr(calc) ppm Start End Miss Ions Peptide**

1479.7824 1478.7751 1478.7300 30.5 506 - 520 0 --- R.MFGISVSQGAQGAAR.A

1542.7956 1541.7883 1541.7191 44.9 1 - 13 1 --- -.MCAAQVDRHVAQR.Y

1694.8383 1693.8310 1693.8900 -34.83 414 - 428 1 --- R.RQSSDPLFQLPPPGR.G

1710.8990 1709.8917 1709.8373 31.8 323 - 337 0 --- R.LPVHEGDQLSAPEYR.K

1882.9347 1881.9274 1882.0135 -45.72 61 - 76 1 --- R.EIMLLKEFGGHPNIIR.L + Oxidation (M)

**No match to:** 856.4939, 885.4522, 938.5014, 1053.6335, 1098.4611, 1194.6953, 1206.6763, 1284.7246, 1296.6643, 1308.7093, 1316.7441, 1439.7765, 1531.7724, 1549.6584, 1563.7825, 1589.7406, 1602.7672, 1609.7890, 1731.8218, 1735.8306, 1749.8450, 1770.8924, 1780.8137, 1790.9055, 2087.0152, 2143.0538, 2247.1067

10. EDF1\_MOUSE Mass: 16359 Score: 29 Expect: 21 Matches: 3

Endothelial differentiation-related factor 1 OS=Mus musculus GN=Edf1 PE=1 SV=1

**Observed Mr(expt) Mr(calc) ppm Start End Miss Ions Peptide**

1053.6335 1052.6262 1052.5978 26.9 114 - 123 0 --- R.AIPNNQVLGK.I

1549.6584 1548.6511 1548.7281 -49.69 61 - 72 1 --- K.LDRETEELHHDR.V

2247.1067 2246.0994 2246.1542 -24.42 94 - 113 1 --- K.DLATKINEKQVIADYESGR.A

**No match to:** 856.4939, 885.4522, 938.5014, 1098.4611, 1194.6953, 1206.6763, 1284.7246, 1296.6643, 1308.7093, 1316.7441, 1439.7765, 1479.7824, 1531.7724, 1542.7956, 1563.7825, 1589.7406, 1602.7672, 1609.7890, 1694.8383, 1710.8990, 1731.8218, 1735.8306, 1749.8450, 1770.8924, 1780.8137, 1790.9055, 1882.9347, 2087.0152, 2143.0538

**Search Parameters**

**Type of search** : MS/MS Ion Search

**Enzyme** : Trypsin

**Fixed modifications** : Carbamidomethyl (C)

**Variable modifications** : Oxidation (M)

**Mass values** : Monoisotopic

**Protein Mass** : Unrestricted

**Peptide Mass Tolerance** :  $\pm 50$  ppm

**Fragment Mass Tolerance** :  $\pm 0.6$  Da



Max Missed Cleavages : 1  
Instrument type : MALDI-TOF-TOF  
Query1 (856.4939,1+) : <no title>  
Query2 (885.4522,1+) : <no title>  
Query3 (938.5014,1+) : <no title>  
Query4 (1053.6335,1+) : <no title>  
Query5 (1098.4611,1+) : <no title>  
Query6 (1194.6953,1+) : <no title>  
Query7 (1206.6763,1+) : <no title>  
Query8 (1284.7246,1+) : <no title>  
Query9 (1296.6643,1+) : <no title>  
Query10 (1308.7093,1+) : <no title>  
Query11 (1316.7441,1+) : <no title>  
Query12 (1439.7765,1+) : <no title>  
Query13 (1479.7824,1+) : <no title>  
Query14 (1531.7724,1+) : <no title>  
Query15 (1542.7956,1+) : <no title>  
Query16 (1549.6584,1+) : <no title>  
Query17 (1563.7825,1+) : <no title>  
Query18 (1589.7406,1+) : <no title>  
Query19 (1602.7672,1+) : <no title>  
Query20 (1609.7890,1+) : <no title>  
Query21 (1694.8383,1+) : <no title>  
Query22 (1710.8990,1+) : <no title>  
Query23 (1731.8218,1+) : <no title>  
Query24 (1735.8306,1+) : <no title>  
Query25 (1749.8450,1+) : <no title>  
Query26 (1770.8924,1+) : <no title>  
Query27 (1780.8137,1+) : <no title>  
Query28 (1790.9055,1+) : <no title>  
Query29 (1882.9347,1+) : <no title>  
Query30 (2087.0152,1+) : <no title>  
Query31 (2143.0538,1+) : <no title>  
Query32 (2247.1067,1+) : <no title>

**Mascot:** <http://www.matrixscience.com/>

# **MASCOT** Mascot Search Results **SCIENCE**

User :  
Email :  
Search title : Auto submitted by BioTools  
Database : SwissProt 57.15 (515203 sequences; 181334896 residues)  
Taxonomy : Mus musculus (house mouse) (16230 sequences)  
Timestamp : 5 Nov 2013 at 04:49:53 GMT  
Warning : A Peptide summary report will usually give a much clearer picture of MS/MS search results.  
Top Score : 250 for CPNE1\_MOUSE, Copine-1 OS=Mus musculus GN=Cpne1 PE=1 SV=1

## Mascot Score Histogram

Protein score is  $-10 \cdot \log(P)$ , where P is the probability that the observed match is a random event.

Protein scores greater than 55 are significant ( $p < 0.05$ ).

Protein scores are derived from ions scores as a non-probabilistic basis for ranking protein hits.

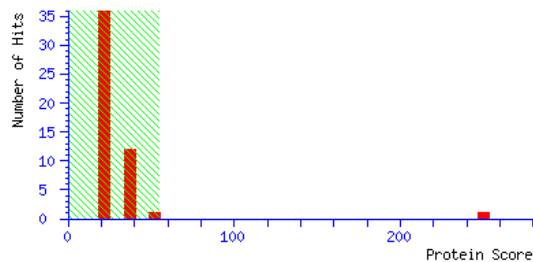

## Protein Summary Report

### Index

| Accession                      | Mass   | Score | Description                                                                                            |
|--------------------------------|--------|-------|--------------------------------------------------------------------------------------------------------|
| 1. <a href="#">CPNE1_MOUSE</a> | 59591  | 250   | Copine-1 OS=Mus musculus GN=Cpne1 PE=1 SV=1                                                            |
| 2. <a href="#">ZN639_MOUSE</a> | 57182  | 48    | Zinc finger protein 639 OS=Mus musculus GN=Znf639 PE=2 SV=1                                            |
| 3. <a href="#">GRHL3_MOUSE</a> | 68400  | 43    | Grainyhead-like protein 3 homolog OS=Mus musculus GN=Grhl3 PE=2 SV=1                                   |
| 4. <a href="#">MYH4_MOUSE</a>  | 223632 | 41    | Myosin-4 OS=Mus musculus GN=Myh4 PE=2 SV=1                                                             |
| 5. <a href="#">ESL3_MOUSE</a>  | 68572  | 41    | Epidermal growth factor receptor kinase substrate 8-like protein 3 OS=Mus musculus GN=Eps813 PE=2 SV=1 |
| 6. <a href="#">COPA_MOUSE</a>  | 140011 | 39    | Coatomer subunit alpha OS=Mus musculus GN=Copa PE=1 SV=1                                               |
| 7. <a href="#">RHG22_MOUSE</a> | 78308  | 38    | Rho GTPase-activating protein 22 OS=Mus musculus GN=Arhgap22 PE=1 SV=2                                 |
| 8. <a href="#">DEPD6_MOUSE</a> | 46603  | 37    | DEP domain-containing mTOR-interacting protein OS=Mus musculus GN=Depdc6 PE=1 SV=2                     |
| 9. <a href="#">RT33_MOUSE</a>  | 12452  | 35    | 28S ribosomal protein S33, mitochondrial OS=Mus musculus GN=Mrps33 PE=2 SV=1                           |
| 10. <a href="#">SYCM_MOUSE</a> | 61804  | 34    | Probable cysteinyl-tRNA synthetase, mitochondrial OS=Mus musculus GN=Cars2 PE=2 SV=2                   |

## Results List

1. [CPNE1\\_MOUSE](#) Mass: 59591 Score: 250 Expect: 1.6e-021 Matches: 13

Copine-1 OS=Mus musculus GN=Cpnel PE=1 SV=1

**Observed Mr(expt) Mr(calc) ppm Start End Miss Ions Peptide**

|           |           |           |        |           |   |    |                     |
|-----------|-----------|-----------|--------|-----------|---|----|---------------------|
| 811.4811  | 810.4739  | 810.4712  | 3.31   | 377 - 383 | 0 | -- | R.QALPQVRL          |
| 836.4309  | 835.4236  | 835.4341  | -12.46 | 171 - 176 | 0 | -- | K.WQLAYR.T          |
| 888.4842  | 887.4770  | 887.4726  | 4.95   | 487 - 493 | 1 | -- | R.RFQNAPE           |
| 990.5112  | 989.5040  | 989.5043  | -0.29  | 400 - 408 | 0 | 25 | R.FAAQAAQQR.S       |
| 1033.5244 | 1032.5172 | 1032.5274 | -9.90  | 138 - 146 | 0 | -- | R.VVTMEVEAR.N       |
| 1136.6170 | 1135.6097 | 1135.6026 | 6.23   | 478 - 486 | 0 | 47 | R.DIVQFVPYR.R       |
| 1157.5706 | 1156.5633 | 1156.5553 | 6.95   | 157 - 165 | 0 | 42 | K.SDPFLEFFR.Q       |
| 1292.7062 | 1291.6989 | 1291.7037 | -3.70  | 478 - 487 | 1 | -- | R.DIVQFVPYRR.F      |
| 1321.6803 | 1320.6730 | 1320.6575 | 11.7   | 166 - 176 | 1 | -- | R.QDQGWQLAYR.T      |
| 1353.6625 | 1352.6552 | 1352.7088 | -39.64 | 73 - 83   | 1 | -- | K.LRFGIYDIDNK.T     |
| 1504.8007 | 1503.7934 | 1503.7893 | 2.76   | 124 - 137 | 1 | -- | R.GTIVSAQELKDSR.V   |
| 1635.8211 | 1634.8138 | 1634.8304 | -10.17 | 60 - 72   | 0 | -- | K.TLQIEYHFETVQK.L   |
| 1782.9728 | 1781.9656 | 1781.9577 | 4.43   | 384 - 399 | 0 | -- | R.LYGPTNFAPINHVAR.F |

**No match to:** 868.4404, 883.4301, 925.4755, 1196.5533, 1284.7291, 1409.7053, 1439.7852, 1479.7914, 1572.8078, 1609.7918, 1657.8209, 1684.8962, 2263.0358, 2301.0336

2. ZNF639\_MOUSE Mass: 57182 Score: 48 Expect: 0.23 Matches: 6

Zinc finger protein 639 OS=Mus musculus GN=Znf639 PE=2 SV=1

**Observed Mr(expt) Mr(calc) ppm Start End Miss Ions Peptide**

|           |           |           |        |           |   |    |                                   |
|-----------|-----------|-----------|--------|-----------|---|----|-----------------------------------|
| 925.4755  | 924.4682  | 924.4375  | 33.3   | 1 - 7     | 1 | -- | -.MNEYPPK.R + Oxidation (M)       |
| 1157.5706 | 1156.5633 | 1156.6200 | -49.00 | 182 - 192 | 0 | -- | K.GQALNVTAQK.W                    |
| 1504.8007 | 1503.7934 | 1503.8198 | -17.51 | 193 - 205 | 1 | -- | K.WPLLANSGLYK.C                   |
| 1635.8211 | 1634.8138 | 1634.7974 | 10.0   | 240 - 253 | 0 | -- | K.EFSTNMLLIEHAK.L + Oxidation (M) |
| 1657.8209 | 1656.8137 | 1656.8736 | -36.18 | 448 - 461 | 1 | -- | K.IHLDFKHSADLPHK.C                |
| 2263.0358 | 2262.0285 | 2262.0674 | -17.19 | 392 - 410 | 1 | -- | R.HVAIEHTKIFPHVCDGK.G             |

**No match to:** 811.4811, 836.4309, 868.4404, 883.4301, 888.4842, 990.5112, 1033.5244, 1136.6170, 1196.5533, 1284.7291, 1292.7062, 1321.6803, 1353.6625, 1409.7053, 1439.7852, 1479.7914, 1572.8078, 1609.7918, 1684.8962, 1782.9728, 2301.0336

3. GRHL3\_MOUSE Mass: 68400 Score: 43 Expect: 0.83 Matches: 6

Grainyhead-like protein 3 homolog OS=Mus musculus GN=Grl3 PE=2 SV=1

**Observed Mr(expt) Mr(calc) ppm Start End Miss Ions Peptide**

|           |           |           |        |           |   |    |                                 |
|-----------|-----------|-----------|--------|-----------|---|----|---------------------------------|
| 1033.5244 | 1032.5172 | 1032.5676 | -48.85 | 74 - 83   | 1 | -- | K.RILSSSTGGR.N                  |
| 1196.5533 | 1195.5461 | 1195.5543 | -6.88  | 245 - 255 | 0 | -- | K.AGESPMAYLNK.G + Oxidation (M) |
| 1321.6803 | 1320.6730 | 1320.6925 | -14.78 | 34 - 45   | 0 | -- | K.TYLENPLTAATK.A                |
| 1353.6625 | 1352.6552 | 1352.6507 | 3.36   | 1 - 11    | 1 | -- | -.MSNELDFRSVR.L                 |
| 1479.7914 | 1478.7841 | 1478.7803 | 2.57   | 279 - 291 | 1 | -- | K.VKSVVMVVDNDK.V                |
| 2301.0336 | 2300.0263 | 2300.0386 | -5.33  | 15 - 33   | 1 | -- | K.NDPVSFQKFPYSNEDEAWK.T         |

**No match to:** 811.4811, 836.4309, 868.4404, 883.4301, 888.4842, 925.4755, 990.5112, 1136.6170, 1157.5706, 1284.7291, 1292.7062, 1409.7053, 1439.7852, 1504.8007, 1572.8078, 1609.7918, 1635.8211, 1657.8209, 1684.8962, 1782.9728, 2263.0358

4. MYH4\_MOUSE Mass: 223632 Score: 41 Expect: 1.2 Matches: 12

Myosin-4 OS=Mus musculus GN=Myh4 PE=2 SV=1

| Observed  | Mr(expt)  | Mr(calc)  | ppm    | Start | End    | Miss | Ions | Peptide                             |
|-----------|-----------|-----------|--------|-------|--------|------|------|-------------------------------------|
| 888.4842  | 887.4770  | 887.4712  | 6.46   | 1535  | - 1541 | 1    | --   | K.KQIDQEK.S                         |
| 990.5112  | 989.5040  | 989.5029  | 1.08   | 865   | - 873  | 1    | --   | K.EDLAKSEAK.R                       |
| 1033.5244 | 1032.5172 | 1032.5386 | -20.74 | 1359  | - 1367 | 1    | --   | K.AELQRAMSK.A                       |
| 1136.6170 | 1135.6097 | 1135.6237 | -12.37 | 407   | - 416  | 1    | --   | R.VKVGNEYVTK.G                      |
| 1321.6803 | 1320.6730 | 1320.6319 | 31.1   | 355   | - 366  | 0    | --   | K.LTGAVMHYGNMK.F                    |
| 1353.6625 | 1352.6552 | 1352.6217 | 24.8   | 355   | - 366  | 0    | --   | K.LTGAVMHYGNMK.F + 2 Oxidation (M)  |
| 1409.7053 | 1408.6981 | 1408.6578 | 28.6   | 1762  | - 1774 | 0    | --   | K.AITDAAMMAEELK.K + Oxidation (M)   |
| 1479.7914 | 1478.7841 | 1478.7980 | -9.40  | 387   | - 400  | 0    | --   | K.AAYLTSLSADLLK.A                   |
| 1572.8078 | 1571.8005 | 1571.8089 | -5.34  | 1681  | - 1693 | 1    | --   | R.RANLMQAEIEELR.A                   |
| 1609.7918 | 1608.7845 | 1608.7738 | 6.61   | 876   | - 888  | 1    | --   | K.ELEEKMVALMQEK.N + 2 Oxidation (M) |
| 1635.8211 | 1634.8138 | 1634.7934 | 12.5   | 1294  | - 1307 | 1    | --   | R.QLDEKDAMVQLSR.G + Oxidation (M)   |
| 1684.8962 | 1683.8889 | 1683.9155 | -15.79 | 1565  | - 1578 | 1    | --   | R.IQLELNQVKSEIDR.K                  |

**No match to:** 811.4811, 836.4309, 868.4404, 883.4301, 925.4755, 1157.5706, 1196.5533, 1284.7291, 1292.7062, 1439.7852, 1504.8007, 1657.8209, 1782.9728, 2263.0358, 2301.0336

5. ES8L3\_MOUSE Mass: 68572 Score: 41 Expect: 1.3 Matches: 6

Epidermal growth factor receptor kinase substrate 8-like protein 3 OS=Mus musculus GN=Eps8l3 PE=2 SV=1

| Observed  | Mr(expt)  | Mr(calc)  | ppm   | Start | End   | Miss | Ions | Peptide                            |
|-----------|-----------|-----------|-------|-------|-------|------|------|------------------------------------|
| 836.4309  | 835.4236  | 835.3970  | 31.9  | 1     | - 7   | 0    | --   | -.MSRPSSR.A + Oxidation (M)        |
| 1033.5244 | 1032.5172 | 1032.4732 | 42.5  | 31    | - 38  | 0    | --   | R.VEHLMTCK.L + Oxidation (M)       |
| 1321.6803 | 1320.6730 | 1320.6826 | -7.30 | 223   | - 234 | 0    | --   | R.EPNGFTLPPPPR.R                   |
| 1439.7852 | 1438.7779 | 1438.7456 | 22.4  | 74    | - 85  | 0    | --   | R.DGWLHLLDIETK.E                   |
| 1572.8078 | 1571.8005 | 1571.7912 | 5.93  | 31    | - 43  | 1    | --   | R.VEHLMTCKLGTQR.V                  |
| 1684.8962 | 1683.8889 | 1683.8654 | 14.0  | 458   | - 471 | 1    | --   | R.AALKMQVLYEFEAR.N + Oxidation (M) |

**No match to:** 811.4811, 868.4404, 883.4301, 888.4842, 925.4755, 990.5112, 1136.6170, 1157.5706, 1196.5533, 1284.7291, 1292.7062, 1353.6625, 1409.7053, 1479.7914, 1504.8007, 1609.7918, 1635.8211, 1657.8209, 1782.9728, 2263.0358, 2301.0336

6. COPA\_MOUSE Mass: 140011 Score: 39 Expect: 2 Matches: 4

Coatomer subunit alpha OS=Mus musculus GN=Copa PE=1 SV=1

| Observed  | Mr(expt)  | Mr(calc)  | ppm    | Start | End   | Miss | Ions | Peptide            |
|-----------|-----------|-----------|--------|-------|-------|------|------|--------------------|
| 990.5112  | 989.5040  | 989.5406  | -37.07 | 424   | - 431 | 1    | 25   | R.NRFAVLDR.M       |
| 1479.7914 | 1478.7841 | 1478.7253 | 39.8   | 468   | - 480 | 0    | --   | R.DADSIFLFDVQQR.R  |
| 1635.8211 | 1634.8138 | 1634.8264 | -7.71  | 468   | - 481 | 1    | --   | R.DADSIFLFDVQQR.T  |
| 1657.8209 | 1656.8137 | 1656.7579 | 33.6   | 247   | - 260 | 0    | --   | R.GHYNNVSCAVFHPR.Q |

**No match to:** 811.4811, 836.4309, 868.4404, 883.4301, 888.4842, 925.4755, 1033.5244, 1136.6170, 1157.5706, 1196.5533, 1284.7291, 1292.7062, 1321.6803, 1353.6625, 1409.7053, 1439.7852, 1504.8007, 1572.8078, 1609.7918, 1684.8962, 1782.9728, 2263.0358, 2301.0336

7. RHG22\_MOUSE Mass: 78308 Score: 38 Expect: 2.5 Matches: 7

Rho GTPase-activating protein 22 OS=Mus musculus GN=Arhgap22 PE=1 SV=2

| Observed | Mr(expt) | Mr(calc) | ppm    | Start | End   | Miss | Ions | Peptide                     |
|----------|----------|----------|--------|-------|-------|------|------|-----------------------------|
| 883.4301 | 882.4228 | 882.4521 | -33.18 | 653   | - 659 | 0    | --   | K.YAMLEIK.L + Oxidation (M) |

990.5112 989.5040 989.5328 -29.11 1 - 9 1 --- -.MLPTASSKR.R  
 1033.5244 1032.5172 1032.4916 24.7 69 - 76 0 --- R.GDQLFYK.D  
 1136.6170 1135.6097 1135.6423 -28.73 653 - 661 1 --- K.YAMLEIKLR.N  
 1292.7062 1291.6989 1291.6520 36.3 191 - 201 1 --- R.ERGLSEGLFR.M  
 1504.8007 1503.7934 1503.7657 18.5 429 - 440 1 --- K.MHTLPVWKSSFR.Q+ Oxidation (M)  
 1684.8962 1683.8889 1683.8580 18.4 107 - 121 1 --- K.HLFEITPGGATEREK.V  
**No match to:** 811.4811, 836.4309, 868.4404, 888.4842, 925.4755, 1157.5706, 1196.5533, 1284.7291, 1321.6803, 1353.6625, 1409.7053, 1439.7852, 1479.7914, 1572.8078, 1609.7918, 1635.8211, 1657.8209, 1782.9728, 2263.0358, 2301.0336

**8. DEPD6\_MOUSE Mass: 46603 Score: 37 Expect: 3.2 Matches: 4**

DEP domain-containing mTOR-interacting protein OS=Mus musculus GN=Depdc6 PE=1 SV=2

| Observed  | Mr(expt)  | Mr(calc)  | ppm    | Start | End | Miss | Ions | Peptide                                       |
|-----------|-----------|-----------|--------|-------|-----|------|------|-----------------------------------------------|
| 990.5112  | 989.5040  | 989.5328  | -29.11 | 88    | 95  | 1    | 8    | K.LMQKLADR.G + Oxidation (M)                  |
| 1157.5706 | 1156.5633 | 1156.5434 | 17.2   | 258   | 268 | 0    | ---  | K.STSFMSVSPSK.E                               |
| 1635.8211 | 1634.8138 | 1634.8205 | -4.12  | 206   | 218 | 0    | ---  | K.HPFVDSNLLYQFR.M                             |
| 2301.0336 | 2300.0263 | 2299.9207 | 45.9   | 1     | 25  | 0    | ---  | -.MEEGSSGGSGSSDSNAGGSGGVQQR.E + Oxidation (M) |

**No match to:** 811.4811, 836.4309, 868.4404, 883.4301, 888.4842, 925.4755, 1033.5244, 1136.6170, 1196.5533, 1284.7291, 1292.7062, 1321.6803, 1353.6625, 1409.7053, 1439.7852, 1479.7914, 1504.8007, 1572.8078, 1609.7918, 1657.8209, 1684.8962, 1782.9728, 2263.0358

**9. RT33\_MOUSE Mass: 12452 Score: 35 Expect: 4.7 Matches: 4**

28S ribosomal protein S33, mitochondrial OS=Mus musculus GN=Mmps33 PE=2 SV=1

| Observed  | Mr(expt)  | Mr(calc)  | ppm    | Start | End | Miss | Ions | Peptide                             |
|-----------|-----------|-----------|--------|-------|-----|------|------|-------------------------------------|
| 836.4309  | 835.4236  | 835.4334  | -11.67 | 11    | 17  | 1    | ---  | R.MSRLSAR.I+ Oxidation (M)          |
| 883.4301  | 882.4228  | 882.4117  | 12.6   | 25    | 32  | 1    | ---  | R.STDSKSMK.V                        |
| 1409.7053 | 1408.6981 | 1408.7132 | -10.78 | 2     | 13  | 1    | ---  | M.SPLSEYALRMSR.L                    |
| 1572.8078 | 1571.8005 | 1571.7436 | 36.2   | 1     | 13  | 1    | ---  | -.MSPLSEYALRMSR.L + 2 Oxidation (M) |

**No match to:** 811.4811, 868.4404, 888.4842, 925.4755, 990.5112, 1033.5244, 1136.6170, 1157.5706, 1196.5533, 1284.7291, 1292.7062, 1321.6803, 1353.6625, 1439.7852, 1479.7914, 1504.8007, 1609.7918, 1635.8211, 1657.8209, 1684.8962, 1782.9728, 2263.0358, 2301.0336

**10. SYCM\_MOUSE Mass: 61804 Score: 34 Expect: 7.1 Matches: 5**

Probable cysteinyl-tRNA synthetase, mitochondrial OS=Mus musculus GN=Cars2 PE=2 SV=2

| Observed  | Mr(expt)  | Mr(calc)  | ppm    | Start | End | Miss | Ions | Peptide                      |
|-----------|-----------|-----------|--------|-------|-----|------|------|------------------------------|
| 925.4755  | 924.4682  | 924.4222  | 49.8   | 298   | 305 | 1    | ---  | K.GTEEKMSK.S + Oxidation (M) |
| 1292.7062 | 1291.6989 | 1291.6707 | 21.9   | 470   | 479 | 1    | ---  | R.CVVDELVRFR.L               |
| 1409.7053 | 1408.6981 | 1408.6617 | 25.8   | 457   | 469 | 0    | ---  | R.QCVSGDSSTVTLR.C            |
| 1572.8078 | 1571.8005 | 1571.8532 | -33.52 | 404   | 417 | 0    | ---  | R.AVNTILDLVHHR.Q             |
| 1657.8209 | 1656.8137 | 1656.8447 | -18.70 | 319   | 331 | 1    | ---  | K.TFSPDVFRLFCLRT             |

**No match to:** 811.4811, 836.4309, 868.4404, 883.4301, 888.4842, 990.5112, 1033.5244, 1136.6170, 1157.5706, 1196.5533, 1284.7291, 1321.6803, 1353.6625, 1439.7852, 1479.7914, 1504.8007, 1609.7918, 1635.8211, 1684.8962, 1782.9728, 2263.0358, 2301.0336

**Search Parameters**

Type of search : MS/MS Ion Search  
 Enzyme : Trypsin

**Fixed modifications** : Carbamidomethyl (C)

**Variable modifications** : Oxidation (M)

**Mass values** : Monoisotopic

**Protein Mass** : Unrestricted

**Peptide Mass Tolerance** :  $\pm 50$  ppm

**Fragment Mass Tolerance**:  $\pm 0.6$  Da

**Max Missed Cleavages** : 1

**Instrument type** : MALDI-TOF-TOF

**Query1 (811.4811,1+)** : <no title>

**Query2 (836.4309,1+)** : <no title>

**Query3 (868.4404,1+)** : <no title>

**Query4 (883.4301,1+)** : <no title>

**Query5 (888.4842,1+)** : <no title>

**Query6 (925.4755,1+)** : <no title>

**Query7 (990.5112,1+)** : <no title>

**Query8 (1033.5244,1+)** : <no title>

**Query9 (1136.6170,1+)** : <no title>

**Query10 (1157.5706,1+)** : <no title>

**Query11 (1196.5533,1+)** : <no title>

**Query12 (1284.7291,1+)** : <no title>

**Query13 (1292.7062,1+)** : <no title>

**Query14 (1321.6803,1+)** : <no title>

**Query15 (1353.6625,1+)** : <no title>

**Query16 (1409.7053,1+)** : <no title>

**Query17 (1439.7852,1+)** : <no title>

**Query18 (1479.7914,1+)** : <no title>

**Query19 (1504.8007,1+)** : <no title>

**Query20 (1572.8078,1+)** : <no title>

**Query21 (1609.7918,1+)** : <no title>

**Query22 (1635.8211,1+)** : <no title>

**Query23 (1657.8209,1+)** : <no title>

**Query24 (1684.8962,1+)** : <no title>

**Query25 (1782.9728,1+)** : <no title>

**Query26 (2263.0358,1+)** : <no title>

**Query27 (2301.0336,1+)** : <no title>

**Mascot:** <http://www.matrixscience.com/>

# **MASCOT** Mascot Search Results **SCIENCE**

User :  
Email :  
Search title : Auto submitted by BioTools  
Database : SwissProt 57.15 (515203 sequences; 181334896 residues)  
Taxonomy : Mus musculus (house mouse) (16230 sequences)  
Timestamp : 5 Nov 2013 at 04:49:45 GMT  
Warning : A Peptide summary report will usually give a much clearer picture of MS/MS search results.  
Top Score : 256 for K2C8\_MOUSE, Keratin, type II cytoskeletal 8 OS=Mus musculus GN=Krt8 PE=1 SV=4

## Mascot Score Histogram

Protein score is  $-10 \cdot \log(P)$ , where P is the probability that the observed match is a random event.

Protein scores greater than 55 are significant ( $p < 0.05$ ).

Protein scores are derived from ions scores as a non-probabilistic basis for ranking protein hits.

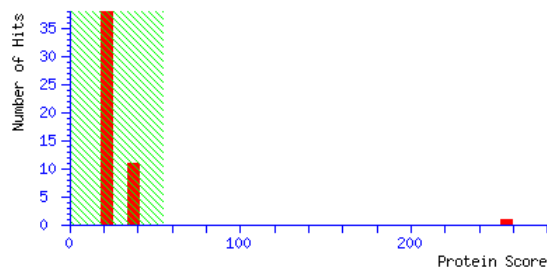

## Protein Summary Report

### Index

| Accession             | Mass  | Score | Description                                                                        |
|-----------------------|-------|-------|------------------------------------------------------------------------------------|
| 1. <u>K2C8_MOUSE</u>  | 54531 | 256   | Keratin, type II cytoskeletal 8 OS=Mus musculus GN=Krt8 PE=1 SV=4                  |
| 2. <u>SERC_MOUSE</u>  | 40732 | 41    | Phosphoserine aminotransferase OS=Mus musculus GN=Psat1 PE=1 SV=1                  |
| 3. <u>COMD9_MOUSE</u> | 22121 | 38    | COMM domain-containing protein 9 OS=Mus musculus GN=Comm9 PE=2 SV=3                |
| 4. <u>CA113_MOUSE</u> | 60686 | 36    | SH3 domain-containing protein C1orf13 homolog OS=Mus musculus PE=1 SV=1            |
| 5. <u>SBP1_MOUSE</u>  | 53051 | 35    | Selenium-binding protein 1 OS=Mus musculus GN=Selenbp1 PE=1 SV=2                   |
| 6. <u>SBP2_MOUSE</u>  | 53147 | 35    | Selenium-binding protein 2 OS=Mus musculus GN=Selenbp2 PE=1 SV=2                   |
| 7. <u>K2C7_MOUSE</u>  | 50678 | 32    | Keratin, type II cytoskeletal 7 OS=Mus musculus GN=Krt7 PE=1 SV=1                  |
| 8. <u>TCEA1_MOUSE</u> | 34315 | 32    | Transcription elongation factor A protein 1 OS=Mus musculus GN=Tcea1 PE=1 SV=2     |
| 9. <u>C2D1B_MOUSE</u> | 93490 | 31    | Coiled-coil and C2 domain-containing protein 1B OS=Mus musculus GN=C2d1b PE=1 SV=1 |
| 10. <u>CUL2_MOUSE</u> | 87448 | 31    | Cullin-2 OS=Mus musculus GN=Cul2 PE=1 SV=2                                         |

### Results List

1. K2C8\_MOUSE Mass: 54531 Score: 256 Expect: 4.1e-022 Matches: 17

Keratin, type II cytoskeletal 8 OS=Mus musculus GN=Krt8 PE=1 SV=4

| Observed  | Mr(expt)  | Mr(calc)  | ppm  | Start | End   | Miss | Ions | Peptide                          |
|-----------|-----------|-----------|------|-------|-------|------|------|----------------------------------|
| 868.4504  | 867.4431  | 867.4311  | 13.8 | 302   | - 308 | 1    | ---  | K.HGDDLRR.T                      |
| 879.4440  | 878.4367  | 878.4246  | 13.7 | 24    | - 32  | 0    | ---  | R.SFTSGPGAR.I                    |
| 913.4604  | 912.4531  | 912.4301  | 25.2 | 41    | - 49  | 0    | ---  | R.VGSSSSSFR.G                    |
| 1053.5652 | 1052.5579 | 1052.5250 | 31.2 | 232   | - 239 | 0    | ---  | R.QIHEEEIR.E                     |
| 1079.5303 | 1078.5230 | 1078.5043 | 17.3 | 271   | - 279 | 0    | 7    | R.AQYEDIANR.S                    |
| 1082.6236 | 1081.6163 | 1081.5920 | 22.4 | 108   | - 116 | 1    | ---  | K.FASFIDKVR.F                    |
| 1113.6520 | 1112.6447 | 1112.6189 | 23.2 | 359   | - 368 | 0    | 15   | K.LAELEAALQR.A                   |
| 1208.6187 | 1207.6114 | 1207.5867 | 20.5 | 309   | - 318 | 1    | ---  | R.TKTEISEMNR.N                   |
| 1253.7138 | 1252.7065 | 1252.6775 | 23.1 | 84    | - 94  | 0    | ---  | K.LEVDPNIQAVR.T                  |
| 1318.7068 | 1317.6996 | 1317.6598 | 30.1 | 259   | - 270 | 0    | 22   | R.SLDMDGIIAEVR.A                 |
| 1334.7055 | 1333.6982 | 1333.6548 | 32.6 | 259   | - 270 | 0    | ---  | R.SLDMDGIIAEVR.A + Oxidation (M) |
| 1344.7242 | 1343.7169 | 1343.6681 | 36.3 | 335   | - 347 | 0    | ---  | R.ASLEAAIADAEQR.G                |
| 1355.8004 | 1354.7931 | 1354.7568 | 26.8 | 323   | - 334 | 1    | ---  | R.LQAEIEALKGQR.A                 |
| 1419.7967 | 1418.7894 | 1418.7405 | 34.5 | 220   | - 231 | 0    | 55   | R.LEGLTDEINFLR.Q                 |
| 1426.7703 | 1425.7630 | 1425.6922 | 49.7 | 280   | - 291 | 1    | ---  | R.SRAEAETMYQIK.Y                 |
| 1797.8904 | 1796.8832 | 1796.8250 | 32.3 | 205   | - 219 | 1    | ---  | K.DVDEAYMKNVELES.R.L             |
| 2109.0745 | 2108.0672 | 2108.0056 | 29.2 | 240   | - 258 | 0    | ---  | R.ELQSQISDTSVVLSMDNSR.S          |

**No match to:** 875.4474, 1036.5448, 1051.5915, 1104.5987, 1117.6618, 1192.6491, 1213.5907, 1214.6406, 1233.6737, 1401.7850, 1454.8070, 1689.8623

2. SERC\_MOUSE Mass: 40732 Score: 41 Expect: 1.3 Matches: 5

Phosphoserine aminotransferase OS=Mus musculus GN=Psat1 PE=1 SV=1

| Observed  | Mr(expt)  | Mr(calc)  | ppm   | Start | End   | Miss | Ions | Peptide                              |
|-----------|-----------|-----------|-------|-------|-------|------|------|--------------------------------------|
| 1036.5448 | 1035.5375 | 1035.5284 | 8.80  | 299   | - 306 | 1    | ---  | R.SRMNIPFR.I + Oxidation (M)         |
| 1113.6520 | 1112.6447 | 1112.5979 | 42.1  | 6     | - 16  | 0    | ---  | K.QVVNFGPGPAK.L                      |
| 1117.6618 | 1116.6545 | 1116.6212 | 29.8  | 324   | - 333 | 0    | ---  | K.AVELNMISLK.G                       |
| 1689.8623 | 1688.8550 | 1688.8556 | -0.36 | 1     | - 16  | 1    | ---  | -.MEATKQVVNFGPGPAK.L + Oxidation (M) |
| 2109.0745 | 2108.0672 | 2108.0750 | -3.68 | 337   | - 356 | 1    | ---  | R.SVGGIRASLYNAVTTEDVEK.L             |

**No match to:** 868.4504, 875.4474, 879.4440, 913.4604, 1051.5915, 1053.5652, 1079.5303, 1082.6236, 1104.5987, 1192.6491, 1208.6187, 1213.5907, 1214.6406, 1233.6737, 1253.7138, 1318.7068, 1334.7055, 1344.7242, 1355.8004, 1401.7850, 1419.7967, 1426.7703, 1454.8070, 1797.8904

3. COMD9\_MOUSE Mass: 22121 Score: 38 Expect: 2.7 Matches: 4

COMM domain-containing protein 9 OS=Mus musculus GN=Comm9 PE=2 SV=3

| Observed  | Mr(expt)  | Mr(calc)  | ppm    | Start | End   | Miss | Ions | Peptide          |
|-----------|-----------|-----------|--------|-------|-------|------|------|------------------|
| 879.4440  | 878.4367  | 878.4094  | 31.1   | 134   | - 141 | 0    | ---  | K.TSSDNISR.M     |
| 1214.6406 | 1213.6333 | 1213.6779 | -36.67 | 188   | - 198 | 1    | ---  | R.IRDQLSAVANK.-  |
| 1253.7138 | 1252.7065 | 1252.6928 | 10.9   | 101   | - 110 | 0    | ---  | K.IIVEHISTWR.A   |
| 1334.7055 | 1333.6982 | 1333.6837 | 10.8   | 130   | - 141 | 1    | ---  | R.VDIKTSSDNISR.M |

**No match to:** 868.4504, 875.4474, 913.4604, 1036.5448, 1051.5915, 1053.5652, 1079.5303, 1082.6236, 1104.5987, 1113.6520, 1117.6618, 1192.6491, 1208.6187, 1213.5907, 1233.6737, 1318.7068, 1344.7242, 1355.8004, 1401.7850, 1419.7967, 1426.7703, 1454.8070, 1689.8623,



1797.8904, 2109.0745

4. CA113\_MOUSE Mass: 60686 Score: 36 Expect: 3.6 Matches: 6

SH3 domain-containing protein C1orf113 homolog OS=Mus musculus PE=1 SV=1

**Observed Mr(expt) Mr(calc) ppm Start End Miss Ions Peptide**

875.4474 874.4402 874.4508 -12.18 416 - 422 1 --- K.DERTLNK.A  
1082.6236 1081.6163 1081.5880 26.2 428 - 437 1 --- K.LPSERAGPQK.Q  
1113.6520 1112.6447 1112.6553 -9.54 135 - 144 1 0 K.IISRESAPIK.E  
1344.7242 1343.7169 1343.6867 22.5 1 - 11 0 --- -.MVQSELQLQPR.A + Oxidation (M)  
1355.8004 1354.7931 1354.8071 -10.34 499 - 509 1 --- R.LELLELKLEQK.M  
2109.0745 2108.0672 2107.9619 49.9 397 - 415 0 --- K.AEDVSAMEEANFLEEPLAK.D + Oxidation (M)

**No match to:** 868.4504, 879.4440, 913.4604, 1036.5448, 1051.5915, 1053.5652, 1079.5303, 1104.5987, 1117.6618, 1192.6491, 1208.6187, 1213.5907, 1214.6406, 1233.6737, 1253.7138, 1318.7068, 1334.7055, 1401.7850, 1419.7967, 1426.7703, 1454.8070, 1689.8623, 1797.8904

5. SBP1\_MOUSE Mass: 53051 Score: 35 Expect: 5.4 Matches: 5

Selenium-binding protein 1 OS=Mus musculus GN=Selenbp1 PE=1 SV=2

**Observed Mr(expt) Mr(calc) ppm Start End Miss Ions Peptide**

1051.5915 1050.5843 1050.5498 32.8 412 - 419 0 --- K.QFYDLIR.E  
1214.6406 1213.6333 1213.6204 10.7 53 - 62 0 --- K.SPQYSQVIHR.L  
1233.6737 1232.6665 1232.6401 21.4 104 - 114 0 --- R.IYVVDVGSEPR.A  
1454.8070 1453.7997 1453.7275 49.6 24 - 34 0 --- R.EEIVYLPCIYR.N  
1689.8623 1688.8550 1688.7907 38.1 212 - 227 0 --- K.DGFNPAHVEAGLYGSR.I

**No match to:** 868.4504, 875.4474, 879.4440, 913.4604, 1036.5448, 1053.5652, 1079.5303, 1082.6236, 1104.5987, 1113.6520, 1117.6618, 1192.6491, 1208.6187, 1213.5907, 1253.7138, 1318.7068, 1334.7055, 1344.7242, 1355.8004, 1401.7850, 1419.7967, 1426.7703, 1797.8904, 2109.0745

6. SBP2\_MOUSE Mass: 53147 Score: 35 Expect: 5.4 Matches: 5

Selenium-binding protein 2 OS=Mus musculus GN=Selenbp2 PE=1 SV=2

**Observed Mr(expt) Mr(calc) ppm Start End Miss Ions Peptide**

1051.5915 1050.5843 1050.5498 32.8 412 - 419 0 --- K.QFYDLIR.E  
1214.6406 1213.6333 1213.6204 10.7 53 - 62 0 --- K.SPQYSQVIHR.L  
1233.6737 1232.6665 1232.6401 21.4 104 - 114 0 --- R.IYVVDVGSEPR.A  
1454.8070 1453.7997 1453.7275 49.6 24 - 34 0 --- R.EEIVYLPCIYR.N  
1689.8623 1688.8550 1688.7907 38.1 212 - 227 0 --- K.DGFNPAHVEAGLYGSR.I

**No match to:** 868.4504, 875.4474, 879.4440, 913.4604, 1036.5448, 1053.5652, 1079.5303, 1082.6236, 1104.5987, 1113.6520, 1117.6618, 1192.6491, 1208.6187, 1213.5907, 1253.7138, 1318.7068, 1334.7055, 1344.7242, 1355.8004, 1401.7850, 1419.7967, 1426.7703, 1797.8904, 2109.0745

7. K2C7\_MOUSE Mass: 50678 Score: 32 Expect: 10 Matches: 5

Keratin, type II cytoskeletal 7 OS=Mus musculus GN=Krt7 PE=1 SV=1

**Observed Mr(expt) Mr(calc) ppm Start End Miss Ions Peptide**

1082.6236 1081.6163 1081.5920 22.4 96 - 104 1 --- K.FASFIDKVR.F  
1104.5987 1103.5914 1103.5724 17.3 47 - 58 0 --- R.SAYGGPVGAGIR.E

1117.6618 1116.6545 1116.6291 22.8 134 - 143 0 --- R.IFEAQIAGLR.Q  
 1192.6491 1191.6419 1191.6360 4.92 32 - 42 0 --- R.SLYGLGSSRPR.V  
 1797.8904 1796.8832 1796.9282 -25.04 26 - 42 1 --- R.ASFGSRSLYGLGSSRPR.V

**No match to:** 868.4504, 875.4474, 879.4440, 913.4604, 1036.5448, 1051.5915, 1053.5652, 1079.5303, 1113.6520, 1208.6187, 1213.5907, 1214.6406, 1233.6737, 1253.7138, 1318.7068, 1334.7055, 1344.7242, 1355.8004, 1401.7850, 1419.7967, 1426.7703, 1454.8070, 1689.8623, 2109.0745

**8. TCEAL\_MOUSE** Mass: 34315 Score: 32 Expect: 11 Matches: 4

Transcription elongation factor A protein 1 OS=Mus musculus GN=Tceal PE=1 SV=2

| Observed  | Mr(expt)  | Mr(calc)  | ppm    | Start | End | Miss | Ions | Peptide                       |
|-----------|-----------|-----------|--------|-------|-----|------|------|-------------------------------|
| 879.4440  | 878.4367  | 878.4354  | 1.48   | 12    | 18  | 1    | ---  | K.MDKMVQK.K                   |
| 1104.5987 | 1103.5914 | 1103.6121 | -18.71 | 46    | 55  | 1    | ---  | R.IGMSVNLRK.Q + Oxidation (M) |
| 1113.6520 | 1112.6447 | 1112.6553 | -9.54  | 19    | 29  | 1    | 12   | K.KNAAGALDLLK.E               |
| 1355.8004 | 1354.7931 | 1354.7820 | 8.22   | 20    | 32  | 1    | ---  | K.NAAGALDLLKELK.N             |

**No match to:** 868.4504, 875.4474, 913.4604, 1036.5448, 1051.5915, 1053.5652, 1079.5303, 1082.6236, 1117.6618, 1192.6491, 1208.6187, 1213.5907, 1214.6406, 1233.6737, 1253.7138, 1318.7068, 1334.7055, 1344.7242, 1401.7850, 1419.7967, 1426.7703, 1454.8070, 1689.8623, 1797.8904, 2109.0745

**9. C2D1B\_MOUSE** Mass: 93490 Score: 31 Expect: 12 Matches: 6

Coiled-coil and C2 domain-containing protein 1B OS=Mus musculus GN=Cc2d1b PE=1 SV=1

| Observed  | Mr(expt)  | Mr(calc)  | ppm    | Start | End | Miss | Ions | Peptide                 |
|-----------|-----------|-----------|--------|-------|-----|------|------|-------------------------|
| 879.4440  | 878.4367  | 878.4246  | 13.7   | 418   | 424 | 0    | ---  | K.QYQDAVR.A             |
| 1036.5448 | 1035.5375 | 1035.5686 | -30.03 | 750   | 757 | 1    | ---  | K.LNINRNHR.G            |
| 1079.5303 | 1078.5230 | 1078.5658 | -39.71 | 286   | 295 | 1    | ---  | R.EYKAAALDAK.R          |
| 1334.7055 | 1333.6982 | 1333.6837 | 10.8   | 512   | 524 | 1    | ---  | K.ASSSKESLSPVRE         |
| 1426.7703 | 1425.7630 | 1425.8303 | -47.21 | 559   | 571 | 1    | ---  | R.VAKSLEAQIIQAR.A       |
| 2109.0745 | 2108.0672 | 2108.0329 | 16.3   | 69    | 87  | 1    | ---  | K.GQAPLPMAHIEKLAADCMR.D |

**No match to:** 868.4504, 875.4474, 913.4604, 1051.5915, 1053.5652, 1082.6236, 1104.5987, 1113.6520, 1117.6618, 1192.6491, 1208.6187, 1213.5907, 1214.6406, 1233.6737, 1253.7138, 1318.7068, 1344.7242, 1355.8004, 1401.7850, 1419.7967, 1454.8070, 1689.8623, 1797.8904

**10. CUL2\_MOUSE** Mass: 87448 Score: 31 Expect: 12 Matches: 7

Cullin-2 OS=Mus musculus GN=Cul2 PE=1 SV=2

| Observed  | Mr(expt)  | Mr(calc)  | ppm    | Start | End | Miss | Ions | Peptide                          |
|-----------|-----------|-----------|--------|-------|-----|------|------|----------------------------------|
| 1036.5448 | 1035.5375 | 1035.5423 | -4.64  | 711   | 719 | 0    | ---  | R.FNPSISMIK.K                    |
| 1053.5652 | 1052.5579 | 1052.5324 | 24.2   | 394   | 401 | 1    | ---  | K.YCDNLLKK.S                     |
| 1117.6618 | 1116.6545 | 1116.6213 | 29.8   | 720   | 728 | 1    | ---  | K.KCIEVLIDK.Q                    |
| 1192.6491 | 1191.6419 | 1191.6798 | -31.81 | 677   | 686 | 1    | ---  | R.KMYLQAAIVR.I                   |
| 1208.6187 | 1207.6114 | 1207.6271 | -12.96 | 23    | 32  | 0    | ---  | K.AVVMLEYVER.A                   |
| 1454.8070 | 1453.7997 | 1453.8326 | -22.67 | 150   | 161 | 0    | ---  | K.LMVEPLQNILIR.M + Oxidation (M) |
| 1689.8623 | 1688.8550 | 1688.9025 | -28.15 | 415   | 428 | 1    | ---  | K.LTSFITVFKYIDDK.D               |

**No match to:** 868.4504, 875.4474, 879.4440, 913.4604, 1051.5915, 1079.5303, 1082.6236, 1104.5987, 1113.6520, 1213.5907, 1214.6406, 1233.6737, 1253.7138, 1318.7068, 1334.7055, 1344.7242, 1355.8004, 1401.7850, 1419.7967, 1426.7703, 1797.8904, 2109.0745

## Search Parameters

Type of search : MS/MS Ion Search  
Enzyme : Trypsin  
Fixed modifications : Carbamidomethyl (C)  
Variable modifications : Oxidation (M)  
Mass values : Monoisotopic  
Protein Mass : Unrestricted  
Peptide Mass Tolerance :  $\pm 50$  ppm  
Fragment Mass Tolerance:  $\pm 0.6$  Da  
Max Missed Cleavages : 1  
Instrument type : MALDI-TOF-TOF  
Query1 (868.4504,1+) : <no title>  
Query2 (875.4474,1+) : <no title>  
Query3 (879.4440,1+) : <no title>  
Query4 (913.4604,1+) : <no title>  
Query5 (1036.5448,1+) : <no title>  
Query6 (1051.5915,1+) : <no title>  
Query7 (1053.5652,1+) : <no title>  
Query8 (1079.5303,1+) : <no title>  
Query9 (1082.6236,1+) : <no title>  
Query10 (1104.5987,1+) : <no title>  
Query11 (1113.6520,1+) : <no title>  
Query12 (1117.6618,1+) : <no title>  
Query13 (1192.6491,1+) : <no title>  
Query14 (1208.6187,1+) : <no title>  
Query15 (1213.5907,1+) : <no title>  
Query16 (1214.6406,1+) : <no title>  
Query17 (1233.6737,1+) : <no title>  
Query18 (1253.7138,1+) : <no title>  
Query19 (1318.7068,1+) : <no title>  
Query20 (1334.7055,1+) : <no title>  
Query21 (1344.7242,1+) : <no title>  
Query22 (1355.8004,1+) : <no title>  
Query23 (1401.7850,1+) : <no title>  
Query24 (1419.7967,1+) : <no title>  
Query25 (1426.7703,1+) : <no title>  
Query26 (1454.8070,1+) : <no title>  
Query27 (1689.8623,1+) : <no title>  
Query28 (1797.8904,1+) : <no title>  
Query29 (2109.0745,1+) : <no title>

Mascot: <http://www.matrixscience.com/>

# MASCOT Search Results

**User** :  
**Email** :  
**Search title** : Auto submitted by BioTools  
**Database** : SwissProt 57.15 (515203 sequences; 181334896 residues)  
**Taxonomy** : Mus. (16281 sequences)  
**Timestamp** : 22 Nov 2013 at 05:26:11 GMT  
**Top Score** : 64for HNRPK\_MOUSE, Heterogeneous nuclear ribonucleoprotein K OS=Mus musculus GN=Hnmpk PE=1 SV=1

## Mascot Score Histogram

Protein score is  $-10 \cdot \log(P)$ , where P is the probability that the observed match is a random event.

Protein scores greater than 55 are significant ( $p < 0.05$ ).

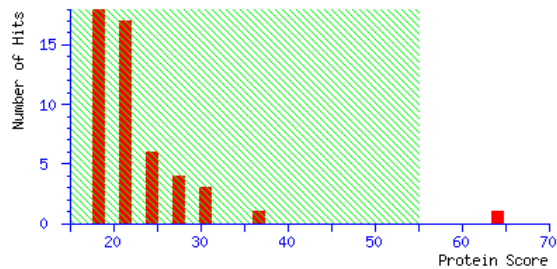

## Protein Summary Report

### Index

| Accession                       | Mass   | Score | Description                                                                   |
|---------------------------------|--------|-------|-------------------------------------------------------------------------------|
| 1. <a href="#">HNRPK_MOUSE</a>  | 51230  | 64    | Heterogeneous nuclear ribonucleoprotein K OS=Mus musculus GN=Hnmpk PE=1 SV=1  |
| 2. <a href="#">BECN1_MOUSE</a>  | 52015  | 37    | Beclin-1 OS=Mus musculus GN=Becn1 PE=1 SV=2                                   |
| 3. <a href="#">ZNF32_MOUSE</a>  | 31722  | 30    | Zinc finger protein 32 OS=Mus musculus GN=Zn32 PE=2 SV=1                      |
| 4. <a href="#">CJ046_MOUSE</a>  | 42364  | 30    | Uncharacterized protein C10orf46 homolog OS=Mus musculus PE=2 SV=1            |
| 5. <a href="#">PDIP2_MOUSE</a>  | 42072  | 29    | Polymerase delta-interacting protein 2 OS=Mus musculus GN=Poldip2 PE=2 SV=1   |
| 6. <a href="#">HIF1N_MOUSE</a>  | 40387  | 29    | Hypoxia-inducible factor 1-alpha inhibitor OS=Mus musculus GN=Hif1n PE=2 SV=2 |
| 7. <a href="#">CCNI_MOUSE</a>   | 42861  | 28    | Cyclin-I OS=Mus musculus GN=Ccni PE=2 SV=3                                    |
| 8. <a href="#">ZN516_MOUSE</a>  | 126820 | 27    | Zinc finger protein 516 OS=Mus musculus GN=Zn516 PE=2 SV=1                    |
| 9. <a href="#">CYP17A_MOUSE</a> | 58000  | 26    | Steroid 17-alpha-hydroxylase/17,20 lyase OS=Mus musculus GN=Cyp17a1 PE=2 SV=1 |
| 10. <a href="#">NXT1_MOUSE</a>  | 16065  | 26    | NTF2-related export protein 1 OS=Mus musculus GN=Nxt1 PE=1 SV=2               |

## Results List

- [HNRPK\\_MOUSE](#) Mass: 51230 Score: 64 Expect: 0.0063 Matches: 6  
 Heterogeneous nuclear ribonucleoprotein K OS=Mus musculus GN=Hnmpk PE=1 SV=1

Observed Mr(expt) Mr(calc) ppm Start End Miss Peptide

1053.6433 1052.6360 1052.6342 1.71 192 - 201 0 R.VVLIGGKPDR.V  
 1098.4711 1097.4639 1097.4448 17.4 140 - 148 0 K.GSDFDCELR.L  
 1194.6953 1193.6880 1193.6921 -3.40 306 - 316 0 R.NLPLPPPPPR.G  
 1549.6538 1548.6465 1548.6450 1.02 180 - 191 0 K.LFQECCPHSTDR.V  
 1735.8135 1734.8062 1734.7995 3.90 22 - 35 1 K.RPAEDMEEEEQAFKRS  
 1780.8203 1779.8130 1779.7911 12.3 70 - 86 0 R.TDYNASVSPDSSGPER.I  
**No match to:** 812.3750, 855.4832, 856.5334, 880.4682, 885.4687, 956.5614, 1216.6740, 1308.7241, 1316.7373, 1479.7734, 1589.7422, 1731.8100, 1749.8608, 1770.8922, 1790.8887, 2248.0680

2. BECN1\_MOUSE Mass: 52015 Score: 37 Expect: 3 Matches: 4

Beclin-1 OS=Mus musculus GN=Becn1 PE=1 SV=2

**Observed Mr(expt) Mr(calc) ppm Start EndMiss Peptide**  
 856.5334 855.5261 855.5079 21.3 79 - 85 1 R.RFIPPAR.M  
 1194.6953 1193.6880 1193.6842 3.19 426 - 435 1 K.ALKFMILTNLK.W + Oxidation (M)  
 1479.7734 1478.7662 1478.7551 7.46 344 - 356 1 K.SKELPLYCSGGLR.F  
 1790.8887 1789.8814 1789.9322 -28.41 247 - 261 1 K.SVENQVRYAQIQDK.L

**No match to:** 812.3750, 855.4832, 880.4682, 885.4687, 956.5614, 1053.6433, 1098.4711, 1216.6740, 1308.7241, 1316.7373, 1549.6538, 1589.7422, 1731.8100, 1735.8135, 1749.8608, 1770.8922, 1780.8203, 2248.0680

3. ZNF32\_MOUSE Mass: 31722 Score: 30 Expect: 17 Matches: 3

Zinc finger protein 32 OS=Mus musculus GN=ZnB2 PE=2 SV=1

**Observed Mr(expt) Mr(calc) ppm Start EndMiss Peptide**  
 1098.4711 1097.4638 1097.4924 -26.00 136 - 144 1 K.ECGKSFSQR.G  
 1194.6953 1193.6880 1193.6377 42.1 171 - 180 1 R.NQSNLAVHRR.V  
 1790.8887 1789.8814 1789.8240 32.1 97 - 111 0 R.IHTGQKPFECTQCGK.S

**No match to:** 812.3750, 855.4832, 856.5334, 880.4682, 885.4687, 956.5614, 1053.6433, 1216.6740, 1308.7241, 1316.7373, 1479.7734, 1549.6538, 1589.7422, 1731.8100, 1735.8135, 1749.8608, 1770.8922, 1780.8203, 2248.0680

4. CJ046\_MOUSE Mass: 42364 Score: 30 Expect: 17 Matches: 3

Uncharacterized protein C10orf46 homolog OS=Mus musculus PE=2 SV=1

**Observed Mr(expt) Mr(calc) ppm Start EndMiss Peptide**  
 855.4832 854.4759 854.4610 17.5 195 - 201 0 K.ITSHLER.V  
 1780.8203 1779.8130 1779.8938 -45.36 59 - 75 0 R.ELPGGQLLAVHAGSMER.K + Oxidation (M)  
 2248.0680 2247.0608 2247.1286 -30.17 130 - 147 1 K.FLMNVITIEDYKSTYWP.K.L

**No match to:** 812.3750, 856.5334, 880.4682, 885.4687, 956.5614, 1053.6433, 1098.4711, 1194.6953, 1216.6740, 1308.7241, 1316.7373, 1479.7734, 1549.6538, 1589.7422, 1731.8100, 1735.8135, 1749.8608, 1770.8922, 1790.8887

5. PDIP2\_MOUSE Mass: 42072 Score: 29 Expect: 20 Matches: 3

Polymerase delta-interacting protein 2 OS=Mus musculus GN=Poldip2 PE=2 SV=1

**Observed Mr(expt) Mr(calc) ppm Start EndMiss Peptide**  
 1316.7373 1315.7300 1315.7388 -6.67 61 - 72 0 K.VLETVGVEVPK.Q  
 1479.7734 1478.7662 1478.7518 9.73 130 - 141 0 K.THTYYQVLIDAR.D  
 1790.8887 1789.8814 1789.8231 32.6 150 - 165 0 R.SQTEAVTFLANHDDSR.A

**No match to:** 812.3750, 855.4832, 856.5334, 880.4682, 885.4687, 956.5614, 1053.6433, 1098.4711, 1194.6953, 1216.6740, 1308.7241, 1549.6538, 1589.7422, 1731.8100, 1735.8135, 1749.8608, 1770.8922, 1780.8203, 2248.0680

**6. HIF1N\_MOUSE Mass: 40387 Score: 29 Expect: 21 Matches: 3**

Hypoxia-inducible factor 1-alpha inhibitor OS=Mus musculus GN=Hif1n PE=2 SV=2

**Observed Mr(expt) Mr(calc) ppm Start EndMiss Peptide**

856.5334 855.5261 855.4926 39.1 132 - 138 0 K.LQAIQQR.G  
1053.6433 1052.6360 1052.5913 42.5 312 - 320 1 K.AHQKVAMR.N  
1549.6538 1548.6465 1548.7202 -47.55 1 - 17 0 -.MAATAAEVAASGSGEAR.E

**No match to:** 812.3750, 855.4832, 880.4682, 885.4687, 956.5614, 1098.4711, 1194.6953, 1216.6740, 1308.7241, 1316.7373, 1479.7734, 1589.7422, 1731.8100, 1735.8135, 1749.8608, 1770.8922, 1780.8203, 1790.8887, 2248.0680

**7. CCNI\_MOUSE Mass: 42861 Score: 28 Expect: 28 Matches: 3**

Cyclin-I OS=Mus musculus GN=Ccni PE=2 SV=3

**Observed Mr(expt) Mr(calc) ppm Start EndMiss Peptide**

1316.7373 1315.7300 1315.6707 45.1 1 - 11 1 -.MKFPGPLENQR.L  
1790.8887 1789.8814 1789.8895 -4.54 86 - 100 0 K.YLNCIAISCFFLAAK.T  
2248.0680 2247.0608 2247.1212 -26.88 57 - 75 0 K.YQFNLYPETFALASSLLDR.F

**No match to:** 812.3750, 855.4832, 856.5334, 880.4682, 885.4687, 956.5614, 1053.6433, 1098.4711, 1194.6953, 1216.6740, 1308.7241, 1479.7734, 1549.6538, 1589.7422, 1731.8100, 1735.8135, 1749.8608, 1770.8922, 1780.8203

**8. ZN516\_MOUSE Mass: 126820 Score: 27 Expect: 32 Matches: 4**

Zinc finger protein 516 OS=Mus musculus GN=Znf516 PE=2 SV=1

**Observed Mr(expt) Mr(calc) ppm Start EndMiss Peptide**

1194.6953 1193.6880 1193.6517 30.4 806 - 818 1 R.SGRTGPPPALGGK.E  
1479.7734 1478.7662 1478.7300 24.5 705 - 717 1 K.LSDLHKEHCGVGK.R  
1735.8135 1734.8062 1734.7454 35.1 1085 - 1099 0 R.TQAHQGDVFCVECGK.S  
2248.0680 2247.0608 2247.1648 -46.30 946 - 968 1 K.LGGPAVGTGFTPPNKHSAPDSLK.A

**No match to:** 812.3750, 855.4832, 856.5334, 880.4682, 885.4687, 956.5614, 1053.6433, 1098.4711, 1216.6740, 1308.7241, 1316.7373, 1549.6538, 1589.7422, 1731.8100, 1749.8608, 1770.8922, 1780.8203, 1790.8887

**9. CP17A\_MOUSE Mass: 58000 Score: 26 Expect: 37 Matches: 3**

Steroid 17-alpha-hydroxylase/17,20 lyase OS=Mus musculus GN=Cyp17a1 PE=2 SV=1

**Observed Mr(expt) Mr(calc) ppm Start EndMiss Peptide**

1216.6740 1215.6667 1215.6652 1.21 127 - 136 0 K.LVFTFSLFR.D  
1735.8135 1734.8062 1734.7420 37.0 403 - 415 1 K.NEWDQPDRFMPER.F + Oxidation (M)  
2248.0680 2247.0608 2247.1682 -47.79 90 - 110 1 K.GKEFSGRPQMVTLLGSDQGK.G

**No match to:** 812.3750, 855.4832, 856.5334, 880.4682, 885.4687, 956.5614, 1053.6433, 1098.4711, 1194.6953, 1308.7241, 1316.7373, 1479.7734, 1549.6538, 1589.7422, 1731.8100, 1749.8608, 1770.8922, 1780.8203, 1790.8887

**10. NXT1\_MOUSE Mass: 16065 Score: 26 Expect: 44 Matches: 2**

NTF2-related export protein 1 OS=Mus musculus GN=Nxt1 PE=1 SV=2

**Observed Mr(expt) Mr(calc) ppm Start EndMiss Peptide**

1780.8203 1779.8130 1779.8025 5.89 16 - 30 0 R.AAEFVNYYTTMDK.R

1790.8887 1789.8814 1789.8127 38.4 1 - 15 1 -.MASVDFKTYVDQACR.A

**No match to:** 812.3750, 855.4832, 856.5334, 880.4682, 885.4687, 956.5614, 1053.6433, 1098.4711, 1194.6953, 1216.6740, 1308.7241, 1316.7373, 1479.7734, 1549.6538, 1589.7422, 1731.8100, 1735.8135, 1749.8608, 1770.8922, 2248.0680

#### Search Parameters

**Type of search** : MS/MS Ion Search

**Enzyme** : Trypsin

**Fixed modifications** : Carbamidomethyl (C)

**Variable modifications** : Oxidation (M)

**Mass values** : Monoisotopic

**Protein Mass** : Unrestricted

**Peptide Mass Tolerance** :  $\pm 50$  ppm

**Fragment Mass Tolerance** :  $\pm 0.6$  Da

**Max Missed Cleavages** : 1

**Instrument type** : MALDI-TOF-TOF

**Mascot:** <http://www.matrixscience.com/>

# **MASCOT** Mascot Search Results **SCIENCE**

User :  
Email :  
Search title : Auto submitted by BioTools  
Database : SwissProt 57.15 (515203 sequences; 181334896 residues)  
Taxonomy : Mus musculus (house mouse) (16230 sequences)  
Timestamp : 5 Nov 2013 at 04:49:36 GMT  
Warning : A Peptide summary report will usually give a much clearer picture of MS/MS search results.  
Top Score : 102 for AL1B1\_MOUSE, Aldehyde dehydrogenase X, mitochondrial OS=Mus musculus GN=Aldh1b1 PE=2 SV=1

## Mascot Score Histogram

Protein score is  $-10 \cdot \log(P)$ , where P is the probability that the observed match is a random event.

Protein scores greater than 55 are significant ( $p < 0.05$ ).

Protein scores are derived from ions scores as a non-probabilistic basis for ranking protein hits.

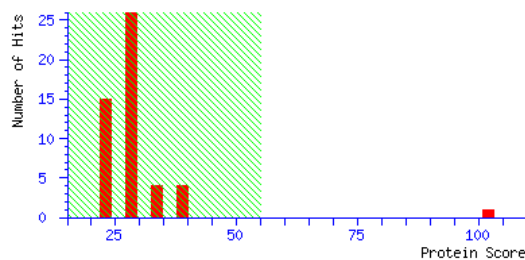

## Protein Summary Report

### Index

| Accession                      | Mass   | Score | Description                                                                  |
|--------------------------------|--------|-------|------------------------------------------------------------------------------|
| 1. <a href="#">AL1B1_MOUSE</a> | 58087  | 102   | Aldehyde dehydrogenase X, mitochondrial OS=Mus musculus GN=Aldh1b1 PE=2 SV=1 |
| 2. <a href="#">GTF2I_MOUSE</a> | 112708 | 39    | General transcription factor II-I OS=Mus musculus GN=Gtf2i PE=1 SV=3         |
| 3. <a href="#">FBX33_MOUSE</a> | 63865  | 37    | F-box only protein 33 OS=Mus musculus GN=Fbxo33 PE=1 SV=2                    |
| 4. <a href="#">CPNE8_MOUSE</a> | 63653  | 36    | Copine-8 OS=Mus musculus GN=Cpne8 PE=2 SV=2                                  |
| 5. <a href="#">SNX25_MOUSE</a> | 98437  | 36    | Sorting nexin-25 OS=Mus musculus GN=Snx25 PE=2 SV=1                          |
| 6. <a href="#">PSMG1_MOUSE</a> | 33938  | 34    | Proteasome assembly chaperone 1 OS=Mus musculus GN=Psmg1 PE=1 SV=1           |
| 7. <a href="#">GSDC2_MOUSE</a> | 54259  | 34    | Gasdermin-C2 OS=Mus musculus GN=Gsdmc2 PE=2 SV=2                             |
| 8. <a href="#">C1128_MOUSE</a> | 55113  | 33    | Uncharacterized protein C9orf128 homolog OS=Mus musculus PE=2 SV=1           |
| 9. <a href="#">RS3_MOUSE</a>   | 26828  | 31    | 40S ribosomal protein S3 OS=Mus musculus GN=Rps3 PE=1 SV=1                   |
| 10. <a href="#">GIT1_MOUSE</a> | 86046  | 30    | ARF GTPase-activating protein GIT1 OS=Mus musculus GN=Git1 PE=1 SV=1         |

## Results List

1. [AL1B1\\_MOUSE](#) Mass: 58087 Score: 102 Expect: 1e-006 Matches: 8



Aldehyde dehydrogenase X, mitochondrial OS=Mus musculus GN=Aldh1b1 PE=2 SV=1

| Observed  | Mr(expt)  | Mr(calc)  | ppm   | Start | End   | Miss | Ions | Peptide                    |
|-----------|-----------|-----------|-------|-------|-------|------|------|----------------------------|
| 804.4269  | 803.4196  | 803.3960  | 29.4  | 386   | - 392 | 0    | ---  | K.LLCGGER.L                |
| 886.5074  | 885.5001  | 885.4920  | 9.24  | 432   | - 438 | 0    | ---  | K.IEEVIQR.A                |
| 888.4606  | 887.4533  | 887.4348  | 20.8  | 495   | - 502 | 0    | ---  | R.ELGEDGLR.A               |
| 1014.5913 | 1013.5841 | 1013.5869 | -2.81 | 431   | - 438 | 1    | ---  | K.KIEEVIQR.A               |
| 1068.5961 | 1067.5889 | 1067.5764 | 11.7  | 444   | - 453 | 0    | 10   | R.YGLAAAVFTR.D             |
| 1143.5708 | 1142.5635 | 1142.5608 | 2.40  | 327   | - 335 | 0    | 20   | R.TFVEESIYR.E              |
| 1572.8251 | 1571.8178 | 1571.7732 | 28.4  | 41    | - 53  | 0    | ---  | K.LFINNEWHDAVSK.K          |
| 2561.2139 | 2560.2066 | 2560.2194 | -4.99 | 350   | - 371 | 1    | ---  | K.VGNPFELDTQQGPQVDKEQFER.I |

**No match to:** 847.4757, 896.5128, 936.4985, 1046.5972, 1091.5733, 1160.6063, 1180.6680, 1259.5844, 1425.7058, 1435.6867, 1673.8262, 1737.9358, 2689.3311

2. GTF2I MOUSE Mass: 112708 Score: 39 Expect: 1.9 Matches: 7

General transcription factor II-I OS=Mus musculus GN=Gtf2i PE=1 SV=3

| Observed  | Mr(expt)  | Mr(calc)  | ppm    | Start | End   | Miss | Ions | Peptide                          |
|-----------|-----------|-----------|--------|-------|-------|------|------|----------------------------------|
| 847.4757  | 846.4684  | 846.4269  | 49.0   | 745   | - 752 | 0    | ---  | K.CGEALGLK.Q                     |
| 886.5074  | 885.5001  | 885.5072  | -7.99  | 186   | - 192 | 0    | ---  | K.RPFLEPK.K                      |
| 1014.5913 | 1013.5841 | 1013.6022 | -17.87 | 186   | - 193 | 1    | ---  | K.RPFLEPKK.H                     |
| 1046.5972 | 1045.5899 | 1045.5669 | 22.0   | 410   | - 418 | 0    | ---  | R.RPSTYGIPR.L                    |
| 1068.5961 | 1067.5889 | 1067.5400 | 45.8   | 346   | - 353 | 1    | ---  | K.VREFNFEK.W                     |
| 1160.6063 | 1159.5990 | 1159.5986 | 0.39   | 562   | - 570 | 1    | ---  | K.EDWNVIRTK.L                    |
| 1425.7058 | 1424.6985 | 1424.7082 | -6.75  | 917   | - 928 | 1    | ---  | K.APSYLEISSMRR.I + Oxidation (M) |

**No match to:** 804.4269, 888.4606, 896.5128, 936.4985, 1091.5733, 1143.5708, 1180.6680, 1259.5844, 1435.6867, 1572.8251, 1673.8262, 1737.9358, 2561.2139, 2689.3311

3. FBX33 MOUSE Mass: 63865 Score: 37 Expect: 3.3 Matches: 5

F-box only protein 33 OS=Mus musculus GN=Fbxo33 PE=1 SV=2

| Observed  | Mr(expt)  | Mr(calc)  | ppm    | Start | End   | Miss | Ions | Peptide                            |
|-----------|-----------|-----------|--------|-------|-------|------|------|------------------------------------|
| 886.5074  | 885.5001  | 885.4780  | 25.0   | 205   | - 211 | 1    | ---  | R.NNRNLQK.F                        |
| 936.4985  | 935.4912  | 935.5262  | -37.42 | 128   | - 134 | 1    | ---  | R.LEFLMRK.C                        |
| 1143.5708 | 1142.5635 | 1142.6046 | -35.93 | 379   | - 387 | 0    | 1    | R.VYLMVFDIK.S + Oxidation (M)      |
| 1425.7058 | 1424.6985 | 1424.7558 | -40.18 | 116   | - 127 | 1    | ---  | R.ICLRVSPAEQPR.L                   |
| 1673.8262 | 1672.8189 | 1672.8858 | -39.98 | 374   | - 387 | 1    | ---  | K.SSSLRVYLMVFDIK.S + Oxidation (M) |

**No match to:** 804.4269, 847.4757, 888.4606, 896.5128, 1014.5913, 1046.5972, 1068.5961, 1091.5733, 1160.6063, 1180.6680, 1259.5844, 1435.6867, 1572.8251, 1737.9358, 2561.2139, 2689.3311

4. CPNE8 MOUSE Mass: 63653 Score: 36 Expect: 3.6 Matches: 5

Copine-8 OS=Mus musculus GN=Cpne8 PE=2 SV=2

| Observed  | Mr(expt)  | Mr(calc)  | ppm    | Start | End   | Miss | Ions | Peptide          |
|-----------|-----------|-----------|--------|-------|-------|------|------|------------------|
| 847.4757  | 846.4684  | 846.4447  | 28.0   | 454   | - 461 | 0    | ---  | K.ESIVNASK.L     |
| 1143.5708 | 1142.5635 | 1142.5760 | -10.97 | 178   | - 186 | 0    | 0    | K.SDPFLVFYR.S    |
| 1425.7058 | 1424.6985 | 1424.6718 | 18.8   | 219   | - 230 | 1    | ---  | R.ALCNGDYDRTIK.V |

1673.8262 1672.8189 1672.8759 -34.07 359 - 374 1 --- K.MFPALGFGAKLPPDGR.I

1737.9358 1736.9285 1736.8563 41.6 173 - 186 1 --- K.DFFGKSDPFLVFYR.S

**No match to:** 804.4269, 886.5074, 888.4606, 896.5128, 936.4985, 1014.5913, 1046.5972, 1068.5961, 1091.5733, 1160.6063, 1180.6680, 1259.5844, 1435.6867, 1572.8251, 2561.2139, 2689.3311

5. SNX25\_MOUSE Mass: 98437 Score: 36 Expect: 4 Matches: 6

Sorting nexin-25 OS=Mus musculus GN=Snx25 PE=2 SV=1

| Observed  | Mr(expt)  | Mr(calc)  | ppm    | Start | End | Miss | Ions  | Peptide        |
|-----------|-----------|-----------|--------|-------|-----|------|-------|----------------|
| 886.5074  | 885.5001  | 885.5284  | -31.87 | 636   | -   | 643  | 1 --- | K.VIDVQGKK.T   |
| 896.5128  | 895.5055  | 895.5127  | -8.06  | 56    | -   | 63   | 0 --- | R.LSHVDVVK.V   |
| 1143.5708 | 1142.5635 | 1142.5832 | -17.26 | 559   | -   | 567  | 0 --- | R.LSEFQNLHR.K  |
| 1160.6063 | 1159.5990 | 1159.6271 | -24.20 | 569   | -   | 578  | 1 --- | K.LSECVPSLKK.V |
| 1180.6680 | 1179.6608 | 1179.6724 | -9.87  | 54    | -   | 63   | 1 --- | R.QRLSHVDVVK.V |
| 1259.5844 | 1258.5771 | 1258.6016 | -19.44 | 307   | -   | 316  | 1 --- | R.FGTYMERIDK.R |

**No match to:** 804.4269, 847.4757, 888.4606, 936.4985, 1014.5913, 1046.5972, 1068.5961, 1091.5733, 1425.7058, 1435.6867, 1572.8251, 1673.8262, 1737.9358, 2561.2139, 2689.3311

6. PSMG1\_MOUSE Mass: 33938 Score: 34 Expect: 6 Matches: 4

Proteasome assembly chaperone 1 OS=Mus musculus GN=Psmg1 PE=1 SV=1

| Observed  | Mr(expt)  | Mr(calc)  | ppm    | Start | End | Miss | Ions  | Peptide        |
|-----------|-----------|-----------|--------|-------|-----|------|-------|----------------|
| 847.4757  | 846.4684  | 846.4997  | -36.97 | 259   | -   | 265  | 1 --- | R.SLKCLVK.N    |
| 888.4606  | 887.4533  | 887.4097  | 49.1   | 30    | -   | 36   | 1 --- | R.RDTPEDR.E    |
| 1068.5961 | 1067.5889 | 1067.5652 | 22.2   | 2     | -   | 11   | 0 --- | M.AATFFGEVVK.A |
| 1143.5708 | 1142.5635 | 1142.6183 | -47.92 | 266   | -   | 275  | 0 --- | K.NIPESTEILK.K |

**No match to:** 804.4269, 886.5074, 896.5128, 936.4985, 1014.5913, 1046.5972, 1091.5733, 1160.6063, 1180.6680, 1259.5844, 1425.7058, 1435.6867, 1572.8251, 1673.8262, 1737.9358, 2561.2139, 2689.3311

7. GSDC2\_MOUSE Mass: 54259 Score: 34 Expect: 6.5 Matches: 4

Gasdermin-C2 OS=Mus musculus GN=Gsdmc2 PE=2 SV=2

| Observed  | Mr(expt)  | Mr(calc)  | ppm    | Start | End | Miss | Ions  | Peptide                                      |
|-----------|-----------|-----------|--------|-------|-----|------|-------|----------------------------------------------|
| 886.5074  | 885.5001  | 885.5283  | -31.84 | 336   | -   | 342  | 1 --- | K.ILDELRK.D                                  |
| 1014.5913 | 1013.5841 | 1013.5698 | 14.0   | 176   | -   | 183  | 1 --- | K.GFFKQLFK.V                                 |
| 2561.2139 | 2560.2066 | 2560.2124 | -2.25  | 313   | -   | 335  | 0 --- | K.VLYDLMNMLELNQLGHMDGPGGK.I + Oxidation (M)  |
| 2689.3311 | 2688.3238 | 2688.3073 | 6.12   | 312   | -   | 335  | 1 --- | R.KVLYDLMNMLELNQLGHMDGPGGK.I + Oxidation (M) |

**No match to:** 804.4269, 847.4757, 888.4606, 896.5128, 936.4985, 1046.5972, 1068.5961, 1091.5733, 1143.5708, 1160.6063, 1180.6680, 1259.5844, 1425.7058, 1435.6867, 1572.8251, 1673.8262, 1737.9358

8. C1128\_MOUSE Mass: 55113 Score: 33 Expect: 8.3 Matches: 4

Uncharacterized protein C9orf128 homolog OS=Mus musculus PE=2 SV=1

| Observed  | Mr(expt)  | Mr(calc)  | ppm  | Start | End | Miss | Ions  | Peptide                                  |
|-----------|-----------|-----------|------|-------|-----|------|-------|------------------------------------------|
| 1046.5972 | 1045.5899 | 1045.5590 | 29.6 | 296   | -   | 304  | 1 --- | K.RAELVEMAK.A                            |
| 1091.5733 | 1090.5660 | 1090.5560 | 9.21 | 404   | -   | 412  | 1 --- | R.ATFDPKAWR.A                            |
| 2561.2139 | 2560.2066 | 2560.1953 | 4.42 | 382   | -   | 401  | 0 --- | R.CLMFCFIPSRPEEVGEFWLK.K + Oxidation (M) |

2689.3311 2688.3238 2688.2903 12.5 382 - 402 1 --- R.CLMFCFIPSRPEEVGEFWLKK.R + Oxidation (M)

No match to: 804.4269, 847.4757, 886.5074, 888.4606, 896.5128, 936.4985, 1014.5913, 1068.5961, 1143.5708, 1160.6063, 1180.6680, 1259.5844, 1425.7058, 1435.6867, 1572.8251, 1673.8262, 1737.9358

9. RS3\_MOUSE Mass: 26828 Score: 31 Expect: 13 Matches: 4

40S ribosomal protein S3 OS=Mus musculus GN=Rps3 PE=1 SV=1

**Observed Mr(expt) Mr(calc) ppm Start End Miss Ions Peptide**

888.4606 887.4533 887.4712 -20.24 55 - 62 0 --- R.TQNVLGEK.G

896.5128 895.5055 895.4804 28.1 11 - 18 0 --- K.FVADGIFK.A

1143.5708 1142.5635 1142.5794 -13.91 188 - 197 0 --- K.IMLPWDPSGK.I

1572.8251 1571.8178 1571.7508 42.6 77 - 90 0 --- R.FGFPEGSVELYAEK.V

No match to: 804.4269, 847.4757, 886.5074, 936.4985, 1014.5913, 1046.5972, 1068.5961, 1091.5733, 1160.6063, 1180.6680, 1259.5844, 1425.7058, 1435.6867, 1673.8262, 1737.9358, 2561.2139, 2689.3311

10. GIT1\_MOUSE Mass: 86046 Score: 30 Expect: 14 Matches: 5

ARF GTPase-activating protein GIT1 OS=Mus musculus GN=Git1 PE=1 SV=1

**Observed Mr(expt) Mr(calc) ppm Start End Miss Ions Peptide**

847.4757 846.4684 846.4824 -16.52 341 - 347 1 --- K.LARFNAR.E

1425.7058 1424.6985 1424.6606 26.7 219 - 229 0 --- R.LVECQYELTDR.L

1572.8251 1571.8178 1571.8381 -12.94 687 - 700 0 --- K.IHLAVTEMASLFPK.R + Oxidation (M)

1673.8262 1672.8189 1672.8103 5.13 243 - 256 1 --- K.NGHYIIPQMADRSR.Q + Oxidation (M)

1737.9358 1736.9285 1736.8437 48.8 257 - 271 1 --- R.QKCMSQSLDLSELAK.A

No match to: 804.4269, 886.5074, 888.4606, 896.5128, 936.4985, 1014.5913, 1046.5972, 1068.5961, 1091.5733, 1143.5708, 1160.6063, 1180.6680, 1259.5844, 1435.6867, 2561.2139, 2689.3311

Search Parameters

Type of search : MS/MS Ion Search

Enzyme : Trypsin

Fixed modifications : Carbamidomethyl (C)

Variable modifications : Oxidation (M)

Mass values : Monoisotopic

Protein Mass : Unrestricted

Peptide Mass Tolerance :  $\pm 50$  ppm

Fragment Mass Tolerance:  $\pm 0.6$  Da

Max Missed Cleavages : 1

Instrument type : MALDI-TOF-TOF

Query1 (804.4269,1+) : <no title>

Query2 (847.4757,1+) : <no title>

Query3 (886.5074,1+) : <no title>

Query4 (888.4606,1+) : <no title>

Query5 (896.5128,1+) : <no title>

Query6 (936.4985,1+) : <no title>

Query7 (1014.5913,1+) : <no title>

Query8 (1046.5972,1+) : <no title>

Query9 (1068.5961,1+) : <no title>

Query10 (1091.5733,1+) : <no title>

Query11 (1143.5708,1+) : <no title>

Query12 (1160.6063,1+) : <no title>

Query13 (1180.6680,1+) : <no title>

Query14 (1259.5844,1+) : <no title>

Query15 (1425.7058,1+) : <no title>

Query16 (1435.6867,1+) : <no title>

Query17 (1572.8251,1+) : <no title>

Query18 (1673.8262,1+) : <no title>

Query19 (1737.9358,1+) : <no title>

Query20 (2561.2139,1+) : <no title>

Query21 (2689.3311,1+) : <no title>

**Mascot:** <http://www.matrixscience.com/>

# **MASCOT** Mascot Search Results

**User** :  
**Email** :  
**Search title** : Auto submitted by BioTools  
**Database** : SwissProt 57.15 (515203 sequences; 181334896 residues)  
**Taxonomy** : Mus musculus (house mouse) (16230 sequences)  
**Timestamp** : 5 Nov 2013 at 04:49:16 GMT  
**Warning** : A Peptide summary report will usually give a much clearer picture of MS/MS search results.  
**Top Score** : 212 for DESM\_MOUSE, Desmin OS=Mus musculus GN=Des PE=1 SV=3

## Mascot Score Histogram

Protein score is  $-10 \cdot \log(P)$ , where P is the probability that the observed match is a random event.

Protein scores greater than 55 are significant ( $p < 0.05$ ).

Protein scores are derived from ions scores as a non-probabilistic basis for ranking protein hits.

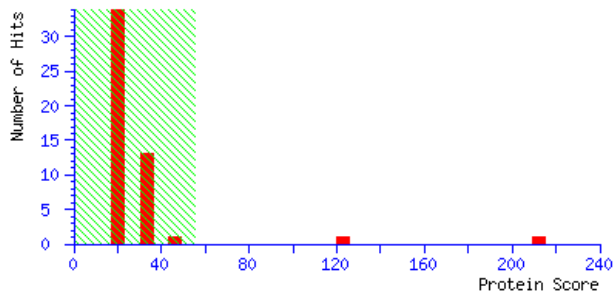

## Protein Summary Report

### Index

| Accession                       | Mass   | Score | Description                                                                               |
|---------------------------------|--------|-------|-------------------------------------------------------------------------------------------|
| 1. <a href="#">DESM_MOUSE</a>   | 53522  | 212   | Desmin OS=Mus musculus GN=Des PE=1 SV=3                                                   |
| 2. <a href="#">GRP78_MOUSE</a>  | 72492  | 128   | 78 kDa glucose-regulated protein OS=Mus musculus GN=Hspa5 PE=1 SV=3                       |
| 3. <a href="#">ETV6_MOUSE</a>   | 56541  | 42    | Transcription factor ETV6 OS=Mus musculus GN=Etv6 PE=1 SV=1                               |
| 4. <a href="#">LAP2_MOUSE</a>   | 158047 | 31    | Protein LAP2 OS=Mus musculus GN=Erb2ip PE=1 SV=2                                          |
| 5. <a href="#">FEZF2_MOUSE</a>  | 50154  | 31    | Fez family zinc finger protein 2 OS=Mus musculus GN=Fez2 PE=2 SV=1                        |
| 6. <a href="#">GSTM2_MOUSE</a>  | 25871  | 31    | Glutathione S-transferase Mu 2 OS=Mus musculus GN=Gstm2 PE=1 SV=2                         |
| 7. <a href="#">PTN13_MOUSE</a>  | 272048 | 30    | Tyrosine-protein phosphatase non-receptor type 13 OS=Mus musculus GN=Ptpn13 PE=1 SV=2     |
| 8. <a href="#">DHSO_MOUSE</a>   | 38795  | 30    | Sorbitol dehydrogenase OS=Mus musculus GN=Sord PE=1 SV=3                                  |
| 9. <a href="#">TSSP2_MOUSE</a>  | 37400  | 30    | Testis serine protease 2 OS=Mus musculus GN=Tessp2 PE=2 SV=1                              |
| 10. <a href="#">MED28_MOUSE</a> | 19697  | 29    | Mediator of RNA polymerase II transcription subunit 28 OS=Mus musculus GN=Med28 PE=1 SV=2 |

## Results List

1. DESM\_MOUSE Mass: 53522 Score: 212 Expect: 1e-017 Matches: 14

Desmin OS=Mus musculus GN=Des PE=1 SV=3

| Observed  | Mr(expt)  | Mr(calc)  | ppm    | Start | End   | Miss | Ions | Peptide                          |
|-----------|-----------|-----------|--------|-------|-------|------|------|----------------------------------|
| 986.4493  | 985.4420  | 985.3997  | 42.9   | 318   | - 324 | 0    | ---  | K.QEMMEYR.H                      |
| 1028.5393 | 1027.5320 | 1027.5662 | -33.28 | 193   | - 200 | 0    | ---  | K.LQEEIQLR.E                     |
| 1086.5430 | 1085.5357 | 1085.5829 | -43.50 | 164   | - 172 | 0    | ---  | R.QVEVLTNQR.A                    |
| 1101.5260 | 1100.5187 | 1100.5462 | -24.95 | 180   | - 188 | 0    | ---  | R.DNLIDDLQR.L                    |
| 1263.5586 | 1262.5513 | 1262.5891 | -29.91 | 201   | - 211 | 0    | ---  | R.EEAENLAAFR.A                   |
| 1268.5345 | 1267.5272 | 1267.5720 | -35.34 | 287   | - 296 | 0    | ---  | K.NISEAEWYK.S                    |
| 1281.6016 | 1280.5943 | 1280.6434 | -38.40 | 395   | - 405 | 0    | ---  | K.MALDVEIATYR.K                  |
| 1284.5249 | 1283.5176 | 1283.5703 | -41.06 | 150   | - 159 | 0    | ---  | R.VAELYEEEMR.E + Oxidation (M)   |
| 1460.6973 | 1459.6901 | 1459.6725 | 12.0   | 38    | - 52  | 1    | ---  | R.AGFGTKGSSSMTSR.V               |
| 1555.6449 | 1554.6376 | 1554.7063 | -44.16 | 355   | - 368 | 0    | ---  | R.FASEANGYQDNIAR.L               |
| 1561.7930 | 1560.7857 | 1560.8511 | -41.91 | 227   | - 239 | 1    | ---  | R.RIESLNEEIAFLK.K                |
| 1673.7965 | 1672.7893 | 1672.8532 | -38.24 | 127   | - 141 | 0    | 81   | R.FLEQQNAALAAEVNR.L              |
| 1699.7946 | 1698.7873 | 1698.8537 | -39.05 | 175   | - 188 | 1    | ---  | R.VDVERDNLIDDLQR.L               |
| 2755.3089 | 2754.3017 | 2754.3501 | -17.57 | 79    | - 104 | 0    | ---  | R.APSYGAGELLDLDFSLADAVNQEFLATR.T |

No match to: 1000.4384, 1002.4702, 1069.5251, 1074.5064, 1191.5963, 1211.5377, 1245.5615, 1282.5709, 1556.6900, 1588.7639, 1689.8601, 1694.7986, 1801.8408, 1860.8545, 1933.9432, 2199.8856, 2258.3810

2. GRP78\_MOUSE Mass: 72492 Score: 128 Expect: 2.6e-009 Matches: 5

78 kDa glucose-regulated protein OS=Mus musculus GN=Hspa5 PE=1 SV=3

| Observed  | Mr(expt)  | Mr(calc)  | ppm    | Start | End   | Miss | Ions | Peptide               |
|-----------|-----------|-----------|--------|-------|-------|------|------|-----------------------|
| 1074.5064 | 1073.4992 | 1073.5465 | -44.12 | 525   | - 533 | 0    | ---  | K.ITIFNDQNR.L         |
| 1191.5963 | 1190.5891 | 1190.6295 | -33.99 | 466   | - 475 | 0    | ---  | K.VYEGERPLTKD         |
| 1460.6973 | 1459.6901 | 1459.7518 | -42.32 | 355   | - 368 | 0    | 55   | K.SDIDEIVLVGGSTR.I    |
| 1801.8408 | 1800.8336 | 1800.8893 | -30.97 | 560   | - 574 | 1    | ---  | R.IDTRNELESYAYSLK.N   |
| 1933.9432 | 1932.9359 | 1933.0058 | -36.15 | 476   | - 493 | 0    | 44   | K.DNHLGTFDLTGIPPAPR.G |

No match to: 986.4493, 1000.4384, 1002.4702, 1028.5393, 1069.5251, 1086.5430, 1101.5260, 1211.5377, 1245.5615, 1263.5586, 1268.5345, 1281.6016, 1282.5709, 1284.5249, 1555.6449, 1556.6900, 1561.7930, 1588.7639, 1673.7965, 1689.8601, 1694.7986, 1699.7946, 1860.8545, 2199.8856, 2258.3810, 2755.3089

3. ETV6\_MOUSE Mass: 56541 Score: 42 Expect: 1.1 Matches: 3

Transcription factor ETV6 OS=Mus musculus GN=Etv6 PE=1 SV=1

| Observed  | Mr(expt)  | Mr(calc)  | ppm    | Start | End   | Miss | Ions | Peptide                             |
|-----------|-----------|-----------|--------|-------|-------|------|------|-------------------------------------|
| 1460.6973 | 1459.6901 | 1459.7267 | -25.06 | 2     | - 14  | 1    | 24   | M.SETPAQSSIKQER.I                   |
| 1689.8601 | 1688.8528 | 1688.9111 | -34.51 | 366   | - 380 | 1    | ---  | R.IVDPNGLARLWGNHK.N                 |
| 1933.9432 | 1932.9359 | 1932.9839 | -24.86 | 41    | - 56  | 1    | ---  | R.ALMEEDSIHLPTHLR.L + Oxidation (M) |

No match to: 986.4493, 1000.4384, 1002.4702, 1028.5393, 1069.5251, 1074.5064, 1086.5430, 1101.5260, 1191.5963, 1211.5377, 1245.5615, 1263.5586, 1268.5345, 1281.6016, 1282.5709, 1284.5249, 1555.6449, 1556.6900, 1561.7930, 1588.7639, 1673.7965, 1694.7986, 1699.7946, 1801.8408, 1860.8545, 2199.8856, 2258.3810, 2755.3089

4. LAP2\_MOUSE Mass: 158047 Score: 31 Expect: 12 Matches: 7

Protein LAP2 OS=Mus musculus GN=ErbB2ip PE=1 SV=2

**Observed Mr(expt) Mr(calc) ppm Start EndMiss Ions Peptide**

1069.5251 1068.5178 1068.5299 -11.27 535 - 544 1 -- K.TSESTTTKSKL  
1211.5377 1210.5305 1210.5578 -22.57 799 - 809 0 -- K.NEAEHIENGAK.F  
1588.7639 1587.7566 1587.7641 -4.71 1008 - 1021 1 -- R.LPRSESAENHSYAK.H  
1689.8601 1688.8528 1688.8556 -1.66 767 - 780 0 -- K.LVTNNIFQPEVMER.S  
1694.7986 1693.7913 1693.8385 -27.86 483 - 496 1 -- R.YPTYPDELKNMVK.T  
1933.9432 1932.9359 1932.9615 -13.24 283 - 299 0 -- K.IDENQLMYLPDSIGGLR.S  
2755.3089 2754.3017 2754.3685 -24.26 1123 - 1147 0 -- R.AYSIDGPNTSRPQSARPSINEIPER.T

**No match to:** 986.4493, 1000.4384, 1002.4702, 1028.5393, 1074.5064, 1086.5430, 1101.5260, 1191.5963, 1245.5615, 1263.5586, 1268.5345, 1281.6016, 1282.5709, 1284.5249, 1460.6973, 1555.6449, 1556.6900, 1561.7930, 1673.7965, 1699.7946, 1801.8408, 1860.8545, 2199.8856, 2258.3810

**5. FEZF2\_MOUSE Mass: 50154 Score: 31 Expect: 13 Matches: 5**

Fez family zinc finger protein 2 OS=Mus musculus GN=Fezf2 PE=2 SV=1

**Observed Mr(expt) Mr(calc) ppm Start EndMiss Ions Peptide**

1028.5393 1027.5320 1027.5410 -8.82 340 - 348 0 -- R.SSTLNTHIR.I  
1086.5430 1085.5357 1085.5717 -33.15 260 - 270 0 -- K.LPGGSTDSKPK.N  
1673.7965 1672.7893 1672.7913 -1.19 2 - 17 0 3 M.ASSASLETMVPPACPR.A  
1689.8601 1688.8528 1688.7862 39.4 2 - 17 0 -- M.ASSASLETMVPPACPR.A + Oxidation (M)  
2755.3089 2754.3017 2754.4158 -41.45 63 - 86 0 -- K.LLNLCSPIPCMIPLQPLGYEVPSKT + Oxidation (M)

**No match to:** 986.4493, 1000.4384, 1002.4702, 1069.5251, 1074.5064, 1101.5260, 1191.5963, 1211.5377, 1245.5615, 1263.5586, 1268.5345, 1281.6016, 1282.5709, 1284.5249, 1460.6973, 1555.6449, 1556.6900, 1561.7930, 1588.7639, 1694.7986, 1699.7946, 1801.8408, 1860.8545, 1933.9432, 2199.8856, 2258.3810

**6. GSTM2\_MOUSE Mass: 25871 Score: 31 Expect: 14 Matches: 5**

Glutathione S-transferase Mu 2 OS=Mus musculus GN=Gstm2 PE=1 SV=2

**Observed Mr(expt) Mr(calc) ppm Start EndMiss Ions Peptide**

1086.5430 1085.5357 1085.5175 16.7 194 - 202 1 -- K.ISDYMKSSR.F  
1561.7930 1560.7857 1560.8221 -23.34 124 - 136 1 -- K.KPEYLEGLPEKMK.L  
1673.7965 1672.7893 1672.8566 -40.26 95 - 108 1 -- R.IRVDILENQAMDTR.I  
1689.8601 1688.8528 1688.8515 0.73 95 - 108 1 -- R.IRVDILENQAMDTR.I + Oxidation (M)  
1699.7946 1698.7873 1698.7858 0.90 174 - 187 1 -- K.CLDAFPNLKDFMGR.F + Oxidation (M)

**No match to:** 986.4493, 1000.4384, 1002.4702, 1028.5393, 1069.5251, 1074.5064, 1101.5260, 1191.5963, 1211.5377, 1245.5615, 1263.5586, 1268.5345, 1281.6016, 1282.5709, 1284.5249, 1460.6973, 1555.6449, 1556.6900, 1588.7639, 1694.7986, 1801.8408, 1860.8545, 1933.9432, 2199.8856, 2258.3810, 2755.3089

**7. PTN13\_MOUSE Mass: 272048 Score: 30 Expect: 15 Matches: 6**

Tyrosine-protein phosphatase non-receptor type 13 OS=Mus musculus GN=Ptpn13 PE=1 SV=2

**Observed Mr(expt) Mr(calc) ppm Start EndMiss Ions Peptide**

1002.4702 1001.4629 1001.4930 -30.07 950 - 957 0 -- K.ASWEKPR.G  
1101.5260 1100.5187 1100.5285 -8.86 1941 - 1950 0 -- R.DGCPVVPTTR.A  
1281.6016 1280.5943 1280.6109 -13.00 308 - 318 1 -- R.DISGETGRYQR.C

1460.6973 1459.6901 1459.7341 -30.14 2321 - 2333 0 18 R.VMALEDIQTGEVR.H  
 1801.8408 1800.8336 1800.8842 -28.13 762 - 775 1 -- K.VCQRLTEYGVHFHR.V  
 1860.8545 1859.8472 1859.8757 -15.33 1961 - 1978 0 -- K.ANGLTSMEPSGQPALMPK.N + 2 Oxidation (M)  
**No match to:** 986.4493, 1000.4384, 1028.5393, 1069.5251, 1074.5064, 1086.5430, 1191.5963, 1211.5377, 1245.5615, 1263.5586, 1268.5345, 1282.5709, 1284.5249, 1555.6449, 1556.6900, 1561.7930, 1588.7639, 1673.7965, 1689.8601, 1694.7986, 1699.7946, 1933.9432, 2199.8856, 2258.3810, 2755.3089

**8. DHSO\_MOUSE Mass: 38795 Score: 30 Expect: 17 Matches: 4**

Sorbitol dehydrogenase OS=Mus musculus GN=Sord PE=1 SV=3

**Observed Mr(expt) Mr(calc) ppm Start End Miss Ions Peptide**

1002.4702 1001.4629 1001.5029 -39.95 227 - 235 0 -- K.ETPQEIASK.V  
 1268.5345 1267.5272 1267.5867 -46.88 101 - 110 1 -- R.EVDEYCKIGR.Y  
 1860.8545 1859.8472 1859.9087 -33.08 92 - 107 1 -- R.VAIEPGVPREVDEYCK.I  
 1933.9432 1932.9359 1933.0303 -48.82 194 - 212 1 -- K.AMGAAQVVVTDLASRLTKA + Oxidation (M)

**No match to:** 986.4493, 1000.4384, 1028.5393, 1069.5251, 1074.5064, 1086.5430, 1101.5260, 1191.5963, 1211.5377, 1245.5615, 1263.5586, 1281.6016, 1282.5709, 1284.5249, 1460.6973, 1555.6449, 1556.6900, 1561.7930, 1588.7639, 1673.7965, 1689.8601, 1694.7986, 1699.7946, 1801.8408, 2199.8856, 2258.3810, 2755.3089

**9. TSSP2\_MOUSE Mass: 37400 Score: 30 Expect: 18 Matches: 4**

Testis serine protease 2 OS=Mus musculus GN=Tessp2 PE=2 SV=1

**Observed Mr(expt) Mr(calc) ppm Start End Miss Ions Peptide**

986.4493 985.4420 985.4474 -5.44 249 - 256 1 -- K.RGMVCGYK.E + Oxidation (M)  
 1191.5963 1190.5891 1190.6408 -43.43 125 - 134 1 -- R.IQYNVKVGDR.S  
 1689.8601 1688.8528 1688.8457 4.17 279 - 293 0 -- K.WVQVGVVSWGSCGR.K  
 1694.7986 1693.7913 1693.8352 -25.89 294 - 308 1 -- R.KGYPGVYTDVAFYSK.W

**No match to:** 1000.4384, 1002.4702, 1028.5393, 1069.5251, 1074.5064, 1086.5430, 1101.5260, 1211.5377, 1245.5615, 1263.5586, 1268.5345, 1281.6016, 1282.5709, 1284.5249, 1460.6973, 1555.6449, 1556.6900, 1561.7930, 1588.7639, 1673.7965, 1699.7946, 1801.8408, 1860.8545, 1933.9432, 2199.8856, 2258.3810, 2755.3089

**10. MED28\_MOUSE Mass: 19697 Score: 29 Expect: 19 Matches: 1**

Mediator of rRNA polymerase II transcription subunit 28 OS=Mus musculus GN=Med28 PE=1 SV=2

**Observed Mr(expt) Mr(calc) ppm Start End Miss Ions Peptide**

1460.6973 1459.6901 1459.7267 -25.06 113 - 124 1 22 K.EDVSELRSELQR.K

**No match to:** 986.4493, 1000.4384, 1002.4702, 1028.5393, 1069.5251, 1074.5064, 1086.5430, 1101.5260, 1191.5963, 1211.5377, 1245.5615, 1263.5586, 1268.5345, 1281.6016, 1282.5709, 1284.5249, 1555.6449, 1556.6900, 1561.7930, 1588.7639, 1673.7965, 1689.8601, 1694.7986, 1699.7946, 1801.8408, 1860.8545, 1933.9432, 2199.8856, 2258.3810, 2755.3089

**Search Parameters**

**Type of search** : MS/MS Ion Search  
**Enzyme** : Trypsin  
**Fixed modifications** : Carbamidomethyl (C)  
**Variable modifications** : Oxidation (M)  
**Mass values** : Monoisotopic



Protein Mass : Unrestricted

Peptide Mass Tolerance :  $\pm 50$  ppm

Fragment Mass Tolerance:  $\pm 0.6$  Da

Max Missed Cleavages : 1

Instrument type : MALDI-TOF-TOF

Query1 (986.4493,1+) : <no title>

Query2 (1000.4384,1+) : <no title>

Query3 (1002.4702,1+) : <no title>

Query4 (1028.5393,1+) : <no title>

Query5 (1069.5251,1+) : <no title>

Query6 (1074.5064,1+) : <no title>

Query7 (1086.5430,1+) : <no title>

Query8 (1101.5260,1+) : <no title>

Query9 (1191.5963,1+) : <no title>

Query10 (1211.5377,1+) : <no title>

Query11 (1245.5615,1+) : <no title>

Query12 (1263.5586,1+) : <no title>

Query13 (1268.5345,1+) : <no title>

Query14 (1281.6016,1+) : <no title>

Query15 (1282.5709,1+) : <no title>

Query16 (1284.5249,1+) : <no title>

Query17 (1460.6973,1+) : <no title>

Query18 (1555.6449,1+) : <no title>

Query19 (1556.6900,1+) : <no title>

Query20 (1561.7930,1+) : <no title>

Query21 (1588.7639,1+) : <no title>

Query22 (1673.7965,1+) : <no title>

Query23 (1689.8601,1+) : <no title>

Query24 (1694.7986,1+) : <no title>

Query25 (1699.7946,1+) : <no title>

Query26 (1801.8408,1+) : <no title>

Query27 (1860.8545,1+) : <no title>

Query28 (1933.9432,1+) : <no title>

Query29 (2199.8856,1+) : <no title>

Query30 (2258.3810,1+) : <no title>

Query31 (2755.3089,1+) : <no title>

Mascot: <http://www.matrixscience.com/>

# **MASCOT** Mascot Search Results **SCIENCE**

User :  
Email :  
Search title : Auto submitted by BioTools  
Database : SwissProt 57.15 (515203 sequences; 181334896 residues)  
Taxonomy : Mus musculus (house mouse) (16230 sequences)  
Timestamp : 5 Nov 2013 at 04:49:07 GMT  
Warning : A Peptide summary report will usually give a much clearer picture of MS/MS search results.  
Top Score : 155 for K2C8\_MOUSE, Keratin, type II cytoskeletal 8 OS=Mus musculus GN=Krt8 PE=1 SV=4

## Mascot Score Histogram

Protein score is  $-10 \cdot \log(P)$ , where P is the probability that the observed match is a random event.

Protein scores greater than 55 are significant ( $p < 0.05$ ).

Protein scores are derived from ions scores as a non-probabilistic basis for ranking protein hits.

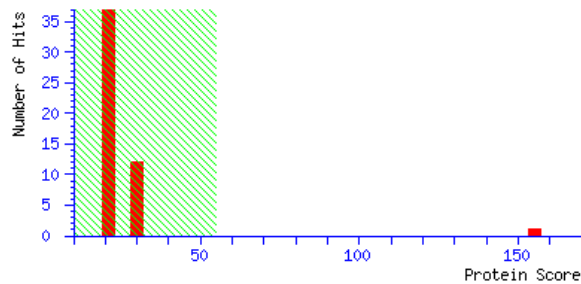

## Protein Summary Report

### Index

| Accession                       | Mass   | Score | Description                                                                                  |
|---------------------------------|--------|-------|----------------------------------------------------------------------------------------------|
| 1. <a href="#">K2C8_MOUSE</a>   | 54531  | 155   | Keratin, type II cytoskeletal 8 OS=Mus musculus GN=Krt8 PE=1 SV=4                            |
| 2. <a href="#">WDR44_MOUSE</a>  | 102063 | 32    | WD repeat-containing protein 44 OS=Mus musculus GN=Wdr44 PE=1 SV=1                           |
| 3. <a href="#">SMC1B_MOUSE</a>  | 145678 | 30    | Structural maintenance of chromosomes protein 1B OS=Mus musculus GN=Smc1b PE=1 SV=1          |
| 4. <a href="#">TIMD3_MOUSE</a>  | 31428  | 30    | Hepatitis A virus cellular receptor 2 homolog OS=Mus musculus GN=Havcr2 PE=2 SV=1            |
| 5. <a href="#">NUD10_MOUSE</a>  | 18809  | 30    | Diphosphoinositol polyphosphate phosphohydrolase 3-alpha OS=Mus musculus GN=Nudt10 PE=2 SV=1 |
| 6. <a href="#">NUD11_MOUSE</a>  | 18809  | 30    | Diphosphoinositol polyphosphate phosphohydrolase 3-beta OS=Mus musculus GN=Nudt11 PE=1 SV=1  |
| 7. <a href="#">GSDA3_MOUSE</a>  | 52330  | 28    | Gasdermin-A3 OS=Mus musculus GN=Gsdma3 PE=1 SV=1                                             |
| 8. <a href="#">ITL1A_MOUSE</a>  | 35444  | 28    | Intelectin-1a OS=Mus musculus GN=Itln1 PE=1 SV=1                                             |
| 9. <a href="#">S18L2_MOUSE</a>  | 8982   | 27    | SS18-like protein 2 OS=Mus musculus GN=Ss18l2 PE=2 SV=1                                      |
| 10. <a href="#">FOXP3_MOUSE</a> | 47886  | 26    | Forkhead box protein P3 OS=Mus musculus GN=Foxp3 PE=2 SV=1                                   |

## Results List

1. K2C8\_MOUSE Mass: 54531 Score: 155 Expect: 5.1e-012 Matches: 11

Keratin, type II cytoskeletal 8 OS=Mus musculus GN=Krt8 PE=1 SV=4

| Observed  | Mr(expt)  | Mr(calc)  | ppm    | Start | End   | Miss | Ions | Peptide                          |
|-----------|-----------|-----------|--------|-------|-------|------|------|----------------------------------|
| 1053.5253 | 1052.5180 | 1052.5250 | -6.66  | 232   | - 239 | 0    | ---  | R.QIHEEEIR.E                     |
| 1079.4992 | 1078.4919 | 1078.5043 | -11.52 | 271   | - 279 | 0    | ---  | R.AQYEDIANR.S                    |
| 1082.5745 | 1081.5672 | 1081.5920 | -22.92 | 108   | - 116 | 1    | ---  | K.FASFIDKVR.F                    |
| 1113.6033 | 1112.5961 | 1112.6189 | -20.54 | 359   | - 368 | 0    | ---  | K.LAELEAALQR.A                   |
| 1253.6634 | 1252.6562 | 1252.6775 | -17.07 | 84    | - 94  | 0    | ---  | K.LEVDPNIQAVR.T                  |
| 1318.6439 | 1317.6366 | 1317.6598 | -17.63 | 259   | - 270 | 0    | ---  | R.SLDMDGIIAEVR.A                 |
| 1334.6548 | 1333.6475 | 1333.6548 | -5.40  | 259   | - 270 | 0    | ---  | R.SLDMDGIIAEVR.A + Oxidation (M) |
| 1344.6602 | 1343.6529 | 1343.6681 | -11.27 | 335   | - 347 | 0    | ---  | R.ASLEAAIADAEQR.G                |
| 1355.7269 | 1354.7196 | 1354.7568 | -27.48 | 323   | - 334 | 1    | ---  | R.LQAEIEALKGQR.A                 |
| 1419.7205 | 1418.7132 | 1418.7405 | -19.27 | 220   | - 231 | 0    | 40   | R.LEGLTDEINFLR.Q                 |
| 1797.8002 | 1796.7929 | 1796.8250 | -17.90 | 205   | - 219 | 1    | ---  | K.DVDEAYMNKVELESR.L              |

No match to: 1040.5286, 1084.5272, 1365.6735, 1406.6671

2. WDR44\_MOUSE Mass: 102063 Score: 32 Expect: 9.8 Matches: 5

WD repeat-containing protein 44 OS=Mus musculus GN=Wdr44 PE=1 SV=1

| Observed  | Mr(expt)  | Mr(calc)  | ppm    | Start | End   | Miss | Ions | Peptide           |
|-----------|-----------|-----------|--------|-------|-------|------|------|-------------------|
| 1053.5253 | 1052.5180 | 1052.5516 | -31.85 | 728   | - 735 | 0    | ---  | K.YHTQIHVR.S      |
| 1082.5745 | 1081.5672 | 1081.5404 | 24.8   | 784   | - 793 | 0    | ---  | K.GYVNSSSQIK.A    |
| 1084.5272 | 1083.5199 | 1083.5634 | -40.13 | 775   | - 783 | 1    | ---  | R.DLSLSMKYK.G     |
| 1355.7269 | 1354.7196 | 1354.7245 | -3.61  | 664   | - 675 | 1    | ---  | R.YFLSGSLDGKLR.L  |
| 1419.7205 | 1418.7132 | 1418.6889 | 17.1   | 562   | - 575 | 0    | ---  | R.VSPSPSQESLSSK.S |

No match to: 1040.5286, 1079.4992, 1113.6033, 1253.6634, 1318.6439, 1334.6548, 1344.6602, 1365.6735, 1406.6671, 1797.8002

3. SMC1B\_MOUSE Mass: 145678 Score: 30 Expect: 16 Matches: 5

Structural maintenance of chromosomes protein 1B OS=Mus musculus GN=Smc1b PE=1 SV=1

| Observed  | Mr(expt)  | Mr(calc)  | ppm    | Start | End   | Miss | Ions | Peptide           |
|-----------|-----------|-----------|--------|-------|-------|------|------|-------------------|
| 1040.5286 | 1039.5213 | 1039.5298 | -8.16  | 426   | - 433 | 1    | ---  | K.EQIEEHKK.R      |
| 1053.5253 | 1052.5180 | 1052.5291 | -10.52 | 510   | - 518 | 0    | ---  | R.LYPDSVFGR.L     |
| 1318.6439 | 1317.6366 | 1317.6776 | -31.10 | 875   | - 886 | 0    | ---  | K.EVLATQSSNIEK.I  |
| 1406.6671 | 1405.6598 | 1405.7136 | -38.26 | 26    | - 38  | 1    | ---  | K.RFTCIIGPNGSGK.S |
| 1419.7205 | 1418.7132 | 1418.7075 | 4.02   | 470   | - 481 | 0    | 10   | R.MSEVNEELSLIR.N  |

No match to: 1079.4992, 1082.5745, 1084.5272, 1113.6033, 1253.6634, 1334.6548, 1344.6602, 1355.7269, 1365.6735, 1797.8002

4. TIMD3\_MOUSE Mass: 31428 Score: 30 Expect: 16 Matches: 3

Hepatitis A virus cellular receptor 2 homolog OS=Mus musculus GN=Havcr2 PE=2 SV=1

| Observed  | Mr(expt)  | Mr(calc)  | ppm  | Start | End  | Miss | Ions | Peptide          |
|-----------|-----------|-----------|------|-------|------|------|------|------------------|
| 1082.5745 | 1081.5672 | 1081.5516 | 14.5 | 74    | - 82 | 1    | ---  | R.NVTYQKSSR.Y    |
| 1253.6634 | 1252.6562 | 1252.6048 | 41.0 | 70    | - 79 | 1    | ---  | R.TDERNVTYQK.S   |
| 1355.7269 | 1354.7196 | 1354.6769 | 31.5 | 21    | - 32 | 0    | ---  | R.SLENAYVFEVGK.N |

No match to: 1040.5286, 1053.5253, 1079.4992, 1084.5272, 1113.6033, 1318.6439, 1334.6548, 1344.6602, 1365.6735, 1406.6671, 1419.7205,

1797.8002

5. NUD10\_MOUSE Mass: 18809 Score: 30 Expect: 16 Matches: 3

Diphosphoinositol polyphosphate phosphohydrolase 3-alpha OS=Mus musculus GN=Nudt10 PE=2 SV=1

**Observed Mr(expt) Mr(calc) ppm Start End Miss Ions Peptide**

1053.5253 1052.5180 1052.5008 16.4 19 - 26 1 --- K.RAACLCFR.S

1084.5272 1083.5199 1083.5237 -3.46 10 - 18 1 --- R.TYDPEGFKK.R

1318.6439 1317.6366 1317.6677 -23.61 79 - 89 0 --- R.LLGVFEQNQDR.K

**No match to:** 1040.5286, 1079.4992, 1082.5745, 1113.6033, 1253.6634, 1334.6548, 1344.6602, 1355.7269, 1365.6735, 1406.6671, 1419.7205, 1797.8002

6. NUD11\_MOUSE Mass: 18809 Score: 30 Expect: 16 Matches: 3

Diphosphoinositol polyphosphate phosphohydrolase 3-beta OS=Mus musculus GN=Nudt11 PE=1 SV=1

**Observed Mr(expt) Mr(calc) ppm Start End Miss Ions Peptide**

1053.5253 1052.5180 1052.5008 16.4 19 - 26 1 --- K.RAACLCFR.S

1084.5272 1083.5199 1083.5237 -3.46 10 - 18 1 --- R.TYDPEGFKK.R

1318.6439 1317.6366 1317.6677 -23.61 79 - 89 0 --- R.LLGVFEQNQDR.K

**No match to:** 1040.5286, 1079.4992, 1082.5745, 1113.6033, 1253.6634, 1334.6548, 1344.6602, 1355.7269, 1365.6735, 1406.6671, 1419.7205, 1797.8002

7. GSDA3\_MOUSE Mass: 52330 Score: 28 Expect: 23 Matches: 3

Gsdermin-A3 OS=Mus musculus GN=Gsdma3 PE=1 SV=1

**Observed Mr(expt) Mr(calc) ppm Start End Miss Ions Peptide**

1355.7269 1354.7196 1354.7146 3.68 45 - 55 1 --- K.STLFWGARYVR.T

1365.6735 1364.6662 1364.7010 -25.43 150 - 161 0 --- K.NLYVVMEAVEAK.Q

1419.7205 1418.7132 1418.6612 36.6 134 - 145 0 4 K.LSADHSFLNEMR.Y

**No match to:** 1040.5286, 1053.5253, 1079.4992, 1082.5745, 1084.5272, 1113.6033, 1253.6634, 1318.6439, 1334.6548, 1344.6602, 1406.6671, 1797.8002

8. ITLIA\_MOUSE Mass: 35444 Score: 28 Expect: 23 Matches: 3

Intelectin-1a OS=Mus musculus GN=Itln1 PE=1 SV=1

**Observed Mr(expt) Mr(calc) ppm Start End Miss Ions Peptide**

1040.5286 1039.5213 1039.5338 -12.05 190 - 198 1 --- K.YPVKYGEGK.C

1082.5745 1081.5672 1081.5556 10.7 51 - 59 0 --- K.AQDGLYFLR.T

1344.6602 1343.6529 1343.6470 4.43 218 - 229 1 --- R.KTASYSPSGQR.E

**No match to:** 1053.5253, 1079.4992, 1084.5272, 1113.6033, 1253.6634, 1318.6439, 1334.6548, 1355.7269, 1365.6735, 1406.6671, 1419.7205, 1797.8002

9. S18L2\_MOUSE Mass: 8982 Score: 27 Expect: 31 Matches: 2

SS18-like protein 2 OS=Mus musculus GN=Ss18l2 PE=2 SV=1

**Observed Mr(expt) Mr(calc) ppm Start End Miss Ions Peptide**

1053.5253 1052.5180 1052.4961 20.9 34 - 41 0 --- R.CIVEYQNK.G

1334.6548 1333.6475 1333.6853 -28.29 1 - 11 0 --- -.MSVIFAPDWLR.G

No match to: 1040.5286, 1079.4992, 1082.5745, 1084.5272, 1113.6033, 1253.6634, 1318.6439, 1344.6602, 1355.7269, 1365.6735, 1406.6671, 1419.7205, 1797.8002

10. FOXP3\_MOUSE Mass: 47886 Score: 26 Expect: 39 Matches: 3

Forkhead box protein P3 OS=Mus musculus GN=Foxp3 PE=2 SV=1

**Observed Mr(expt) Mr(calc) ppm Start End Miss Ions Peptide**

1084.5272 1083.5199 1083.5713 -47.38 348 - 356 0 -- R.WAILEAPER.Q

1365.6735 1364.6662 1364.6143 38.1 216 - 226 0 -- K.HCQADHLLDEK.G

1419.7205 1418.7132 1418.7261 -9.12 263 - 276 1 1 K.MALAKAPSVASMDK.S

No match to: 1040.5286, 1053.5253, 1079.4992, 1082.5745, 1113.6033, 1253.6634, 1318.6439, 1334.6548, 1344.6602, 1355.7269, 1406.6671, 1797.8002

**Search Parameters**

Type of search : MS/MS Ion Search

Enzyme : Trypsin

Fixed modifications : Carbamidomethyl (C)

Variable modifications : Oxidation (M)

Mass values : Monoisotopic

Protein Mass : Unrestricted

Peptide Mass Tolerance :  $\pm 50$  ppm

Fragment Mass Tolerance:  $\pm 0.6$  Da

Max Missed Cleavages : 1

Instrument type : MALDI-TOF-TOF

Query1 (1040.5286,1+) : <no title>

Query2 (1053.5253,1+) : <no title>

Query3 (1079.4992,1+) : <no title>

Query4 (1082.5745,1+) : <no title>

Query5 (1084.5272,1+) : <no title>

Query6 (1113.6033,1+) : <no title>

Query7 (1253.6634,1+) : <no title>

Query8 (1318.6439,1+) : <no title>

Query9 (1334.6548,1+) : <no title>

Query10 (1344.6602,1+) : <no title>

Query11 (1355.7269,1+) : <no title>

Query12 (1365.6735,1+) : <no title>

Query13 (1406.6671,1+) : <no title>

Query14 (1419.7205,1+) : <no title>

Query15 (1797.8002,1+) : <no title>

**Mascot:** <http://www.matrixscience.com/>

# MASCOT Search Results

**User** :  
**Email** :  
**Search title** : Auto submitted by BioTools  
**Database** : SwissProt 57.15 (515203 sequences; 181334896 residues)  
**Taxonomy** : Mus musculus (house mouse) (16230 sequences)  
**Timestamp** : 5 Nov 2013 at 04:48:28 GMT  
**Warning** : A Peptide summary report will usually give a much clearer picture of MS/MS search results.  
**Top Score** : 58 for DESM\_MOUSE, Desmin OS=Mus musculus GN=Des PE=1 SV=3

## Mascot Score Histogram

Protein score is  $-10 \cdot \log(P)$ , where P is the probability that the observed match is a random event.

Protein scores greater than 55 are significant ( $p < 0.05$ ).

Protein scores are derived from ions scores as a non-probabilistic basis for ranking protein hits.

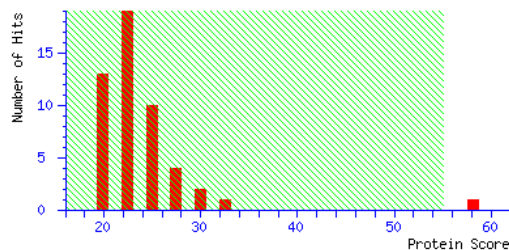

## Protein Summary Report

### Index

| Accession                       | Mass   | Score | Description                                                                                       |
|---------------------------------|--------|-------|---------------------------------------------------------------------------------------------------|
| 1. <a href="#">DESM_MOUSE</a>   | 53522  | 58    | Desmin OS=Mus musculus GN=Des PE=1 SV=3                                                           |
| 2. <a href="#">MIDA_MOUSE</a>   | 48748  | 32    | Protein midA homolog, mitochondrial OS=Mus musculus PE=2 SV=3                                     |
| 3. <a href="#">F158A_MOUSE</a>  | 23058  | 30    | UPF0172 protein FAM158A OS=Mus musculus GN=Fam158a PE=2 SV=1                                      |
| 4. <a href="#">ARFRP_MOUSE</a>  | 23101  | 29    | ADP-ribosylation factor-related protein 1 OS=Mus musculus GN=Arfrp1 PE=2 SV=2                     |
| 5. <a href="#">B3GN7_MOUSE</a>  | 45862  | 28    | UDP-GlcNAc:betaGal beta-1,3-N-acetylglucosaminyltransferase 7 OS=Mus musculus GN=B3gnt7 PE=2 SV=2 |
| 6. <a href="#">UTP18_MOUSE</a>  | 61636  | 28    | U3 small nucleolar RNA-associated protein 18 homolog OS=Mus musculus GN=Utp18 PE=1 SV=1           |
| 7. <a href="#">CBX8_MOUSE</a>   | 39893  | 27    | Chromobox protein homolog 8 OS=Mus musculus GN=Cbx8 PE=1 SV=1                                     |
| 8. <a href="#">DGLB_MOUSE</a>   | 75168  | 26    | Sn1-specific diacylglycerol lipase beta OS=Mus musculus GN=Daglb PE=1 SV=2                        |
| 9. <a href="#">NOP2_MOUSE</a>   | 87098  | 26    | Putative ribosomal RNA methyltransferase NOP2 OS=Mus musculus GN=Nop2 PE=2 SV=1                   |
| 10. <a href="#">T132C_MOUSE</a> | 122100 | 25    | Transmembrane protein 132C OS=Mus musculus GN=Tmem132c PE=2 SV=3                                  |

## Results List

1. DESM\_MOUSE Mass: 53522 Score: 58 Expect: 0.025 Matches: 6

Desmin OS=Mus musculus GN=Des PE=1 SV=3

**Observed Mr(expt) Mr(calc) ppm Start End Miss Ions Peptide**

1028.6123 1027.6050 1027.5662 37.8 193 - 200 0 --- K.LQEEIQLR.E  
1032.5788 1031.5715 1031.5360 34.4 59 - 70 0 --- R.TSGGAGGLGSLR.S  
1587.8675 1586.8602 1586.7900 44.3 105 - 117 1 --- R.TNEKVELQELNDR.F  
1673.9141 1672.9068 1672.8532 32.0 127 - 141 0 --- R.FLEQQNAALAAEVNR.L  
2247.1875 2246.1802 2246.0927 39.0 201 - 221 1 --- R.EEAENLAAFRADVDAATLAR.I  
2755.4207 2754.4134 2754.3501 23.0 79 - 104 0 --- R.APSYGAGELDFSLADAVNQEFLATR.T

**No match to:** 875.5250, 991.4878, 1023.4758, 1055.5335, 1061.5536, 1168.7148, 1268.6611, 1272.0371, 1326.7861, 1433.8186, 1995.0915, 2060.0905, 2462.3472

2. MIDA\_MOUSE Mass: 48748 Score: 32 Expect: 10 Matches: 4

Protein midA homolog, mitochondrial OS=Mus musculus PE=2 SV=3

**Observed Mr(expt) Mr(calc) ppm Start End Miss Ions Peptide**

875.5250 874.5177 874.4807 42.3 1 - 7 1 --- -.MNALVRR.C + Oxidation (M)  
1055.5335 1054.5262 1054.5005 24.4 174 - 182 0 --- R.DAESLVYMK.G  
1061.5536 1060.5464 1060.5699 -22.20 357 - 365 1 --- K.NMGIDVRLK.V + Oxidation (M)  
2060.0905 2059.0832 2059.1037 -9.95 243 - 260 1 --- K.LRFVLAPCATPAEAFIQR.D

**No match to:** 991.4878, 1023.4758, 1028.6123, 1032.5788, 1168.7148, 1268.6611, 1272.0371, 1326.7861, 1433.8186, 1587.8675, 1673.9141, 1995.0915, 2247.1875, 2462.3472, 2755.4207

3. F158A\_MOUSE Mass: 23058 Score: 30 Expect: 17 Matches: 3

UPF0172 protein FAM158A OS=Mus musculus GN=Fam158a PE=2 SV=1

**Observed Mr(expt) Mr(calc) ppm Start End Miss Ions Peptide**

991.4878 990.4805 990.4804 0.11 1 - 9 0 --- -.MGEVEISAR.A  
1032.5788 1031.5715 1031.5685 2.92 111 - 119 0 --- R.AVLIMLDNK.K + Oxidation (M)  
1061.5536 1060.5464 1060.5488 -2.27 144 - 151 1 --- K.DKNLVMWR.D

**No match to:** 875.5250, 1023.4758, 1028.6123, 1055.5335, 1168.7148, 1268.6611, 1272.0371, 1326.7861, 1433.8186, 1587.8675, 1673.9141, 1995.0915, 2060.0905, 2247.1875, 2462.3472, 2755.4207

4. ARFRP\_MOUSE Mass: 23101 Score: 29 Expect: 21 Matches: 3

ADP-ribosylation factor-related protein 1 OS=Mus musculus GN=Arfrp1 PE=2 SV=2

**Observed Mr(expt) Mr(calc) ppm Start End Miss Ions Peptide**

875.5250 874.5177 874.4886 33.3 190 - 196 0 --- R.NVHRPPR.Q  
991.4878 990.4805 990.4844 -3.95 178 - 185 0 --- R.EGIEWMVK.C  
1587.8675 1586.8602 1586.8880 -17.50 53 - 68 0 --- K.ITTTVGLNIGTVDVGK.A

**No match to:** 1023.4758, 1028.6123, 1032.5788, 1055.5335, 1061.5536, 1168.7148, 1268.6611, 1272.0371, 1326.7861, 1433.8186, 1673.9141, 1995.0915, 2060.0905, 2247.1875, 2462.3472, 2755.4207

5. B3GN7\_MOUSE Mass: 45862 Score: 28 Expect: 26 Matches: 3

UDP-GlcNAc:betaGal beta-1,3-N-acetylglucosaminyltransferase 7 OS=Mus musculus GN=B3gnt7 PE=2 SV=2

**Observed Mr(expt) Mr(calc) ppm Start End Miss Ions Peptide**

1433.8186 1432.8114 1432.8402 -20.12 165 - 178 1 --- R.GAVRTLFLLGTASK.Q  
 2462.3472 2461.3399 2461.2569 33.7 195 - 214 0 --- R.LYADILQWDFLDSFFNLTLE.E  
 2755.4207 2754.4134 2754.3583 20.0 115 - 137 1 --- R.YFPMLLNHPEKAGDVYMLVVVK.S + 2 Oxidation (M)  
**No match to:** 875.5250, 991.4878, 1023.4758, 1028.6123, 1032.5788, 1055.5335, 1061.5536, 1168.7148, 1268.6611, 1272.0371, 1326.7861, 1587.8675, 1673.9141, 1995.0915, 2060.0905, 2247.1875

**6. UTP18\_MOUSE Mass: 61636 Score: 28 Expect: 29 Matches: 4**

U3 small nucleolar RNA-associated protein 18 homolog OS=Mus musculus GN=Utp18 PE=1 SV=1

**Observed Mr(expt) Mr(calc) ppm Start End Miss Ions Peptide**

1055.5335 1054.5262 1054.5083 17.0 529 - 538 0 --- R.GGYFALGNEK.G  
 1268.6611 1267.6538 1267.6309 18.1 529 - 540 1 --- R.GGYFALGNEKGR.A  
 1326.7861 1325.7788 1325.7164 47.1 23 - 36 1 --- K.ARPGSGSTPAKAAR.S  
 1433.8186 1432.8114 1432.7925 13.1 280 - 291 1 --- K.TNPKIQSIYLEK.F

**No match to:** 875.5250, 991.4878, 1023.4758, 1028.6123, 1032.5788, 1061.5536, 1168.7148, 1272.0371, 1587.8675, 1673.9141, 1995.0915, 2060.0905, 2247.1875, 2462.3472, 2755.4207

**7. CBX8\_MOUSE Mass: 39893 Score: 27 Expect: 32 Matches: 4**

Chromobox protein homolog 8 OS=Mus musculus GN=Cbx8 PE=1 SV=1

**Observed Mr(expt) Mr(calc) ppm Start End Miss Ions Peptide**

991.4878 990.4805 990.4804 0.11 1 - 9 0 --- -.MELSAVGER.V  
 1028.6123 1027.6050 1027.5927 12.0 101 - 109 1 --- R.GIRIPYPGR.S  
 1061.5536 1060.5464 1060.5149 29.7 110 - 119 0 --- R.SPQDLASTSR.A  
 1673.9141 1672.9068 1672.8645 25.3 280 - 295 1 --- R.VRHSSGTPASVGSLYR.D

**No match to:** 875.5250, 1023.4758, 1032.5788, 1055.5335, 1168.7148, 1268.6611, 1272.0371, 1326.7861, 1433.8186, 1587.8675, 1995.0915, 2060.0905, 2247.1875, 2462.3472, 2755.4207

**8. DGLB\_MOUSE Mass: 75168 Score: 26 Expect: 39 Matches: 4**

Sn1-specific diacylglycerol lipase beta OS=Mus musculus GN=Daglb PE=1 SV=2

**Observed Mr(expt) Mr(calc) ppm Start End Miss Ions Peptide**

1023.4758 1022.4685 1022.5042 -34.86 1 - 9 0 --- -.MPGMVLFGR.R + Oxidation (M)  
 1028.6123 1027.6050 1027.5774 26.8 646 - 654 1 --- R.ALDRVLADR.T  
 1032.5788 1031.5715 1031.5699 1.60 2 - 10 1 --- M.PGMVLFGR.W  
 1673.9141 1672.9068 1672.9222 -9.24 485 - 499 0 --- K.DFVVSLILGMDVIPR.L

**No match to:** 875.5250, 991.4878, 1055.5335, 1061.5536, 1168.7148, 1268.6611, 1272.0371, 1326.7861, 1433.8186, 1587.8675, 1995.0915, 2060.0905, 2247.1875, 2462.3472, 2755.4207

**9. NOP2\_MOUSE Mass: 87098 Score: 26 Expect: 41 Matches: 4**

Putative ribosomal RNA methyltransferase NOP2 OS=Mus musculus GN=Nop2 PE=2 SV=1

**Observed Mr(expt) Mr(calc) ppm Start End Miss Ions Peptide**

1168.7148 1167.7075 1167.7088 -1.11 227 - 236 1 --- K.RIQDIVGVLR.D  
 1268.6611 1267.6538 1267.6455 6.54 468 - 477 1 --- K.DIQRCAHLQK.E  
 1326.7861 1325.7788 1325.7554 17.6 68 - 80 1 --- K.SPGIKTLPGELSK.G  
 2247.1875 2246.1802 2246.1729 3.25 435 - 456 1 --- K.VVGGFDRVLLDAPCSGTGVIK.D



No match to: 875.5250, 991.4878, 1023.4758, 1028.6123, 1032.5788, 1055.5335, 1061.5536, 1272.0371, 1433.8186, 1587.8675, 1673.9141, 1995.0915, 2060.0905, 2462.3472, 2755.4207

**10. T132C\_MOUSE** Mass: 122100 Score: 25 Expect: 54 Matches: 4

Transmembrane protein 132C OS=Mus musculus GN=Tmem132c PE=2 SV=3

| Observed  | Mr(expt)  | Mr(calc)  | ppm    | Start | End   | Miss | Ions | Peptide                                   |
|-----------|-----------|-----------|--------|-------|-------|------|------|-------------------------------------------|
| 1032.5788 | 1031.5715 | 1031.5328 | 37.5   | 80    | - 87  | 0    | ---  | R.VESFFIYK.A                              |
| 1673.9141 | 1672.9068 | 1672.8818 | 15.0   | 689   | - 704 | 1    | ---  | K.ATSAVAMAEELLRAPK.K + Oxidation (M)      |
| 2247.1875 | 2246.1802 | 2246.1716 | 3.87   | 634   | - 654 | 0    | ---  | R.EVGMTTIQVLSPLSDSILAEK.T + Oxidation (M) |
| 2755.4207 | 2754.4134 | 2754.5201 | -38.75 | 629   | - 654 | 1    | ---  | R.VLVGREVGMTTIQVLSPLSDSILAEK.T            |

No match to: 875.5250, 991.4878, 1023.4758, 1028.6123, 1055.5335, 1061.5536, 1168.7148, 1268.6611, 1272.0371, 1326.7861, 1433.8186, 1587.8675, 1995.0915, 2060.0905, 2462.3472

**Search Parameters**

Type of search : MS/MS Ion Search  
Enzyme : Trypsin  
Fixed modifications : Carbamidomethyl (C)  
Variable modifications : Oxidation (M)  
Mass values : Monoisotopic  
Protein Mass : Unrestricted  
Peptide Mass Tolerance :  $\pm 50$  ppm  
Fragment Mass Tolerance:  $\pm 0.6$  Da  
Max Missed Cleavages : 1  
Instrument type : MALDI-TOF-TOF  
Query1 (875.5250,1+) : <no title>  
Query2 (991.4878,1+) : <no title>  
Query3 (1023.4758,1+) : <no title>  
Query4 (1028.6123,1+) : <no title>  
Query5 (1032.5788,1+) : <no title>  
Query6 (1055.5335,1+) : <no title>  
Query7 (1061.5536,1+) : <no title>  
Query8 (1168.7148,1+) : <no title>  
Query9 (1268.6611,1+) : <no title>  
Query10 (1272.0371,1+) : <no title>  
Query11 (1326.7861,1+) : <no title>  
Query12 (1433.8186,1+) : <no title>  
Query13 (1587.8675,1+) : <no title>  
Query14 (1673.9141,1+) : <no title>  
Query15 (1995.0915,1+) : <no title>  
Query16 (2060.0905,1+) : <no title>  
Query17 (2247.1875,1+) : <no title>  
Query18 (2462.3472,1+) : <no title>  
Query19 (2755.4207,1+) : <no title>

**Mascot:** <http://www.matrixscience.com/>

# MASCOT Search Results

User :  
Email :  
Search title : Auto submitted by BioTools  
Database : IPI\_mouse (59534 sequences; 26627161 residues)  
Timestamp : 5 Nov 2013 at 07:59:02 GMT  
Warning : A Peptide summary report will usually give a much clearer picture of MS/MS search results.  
Top Score : 177 for IPI00128108, Tax\_Id=10090 Gene\_Symbol=Try4 trypsin 4

## Mascot Score Histogram

Protein score is  $-10 \cdot \log(P)$ , where P is the probability that the observed match is a random event.

Protein scores greater than 60 are significant ( $p < 0.05$ ).

Protein scores are derived from ions scores as a non-probabilistic basis for ranking protein hits.

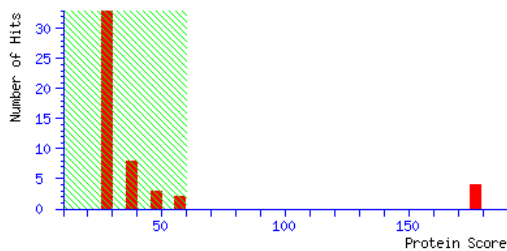

## Protein Summary Report

### Index

| Accession                       | Mass   | Score | Description                                                                    |
|---------------------------------|--------|-------|--------------------------------------------------------------------------------|
| 1. <a href="#">IPI00128108</a>  | 26941  | 177   | Tax_Id=10090 Gene_Symbol=Try4 trypsin 4                                        |
| 2. <a href="#">IPI00759953</a>  | 26944  | 177   | Tax_Id=10090 Gene_Symbol=Try5 trypsin 5                                        |
| 3. <a href="#">IPI00989590</a>  | 27961  | 176   | Tax_Id=10090 Gene_Symbol=Try4 Uncharacterized protein                          |
| 4. <a href="#">IPI00406464</a>  | 28002  | 176   | Tax_Id=10090 Gene_Symbol=Try5 Putative uncharacterized protein                 |
| 5. <a href="#">IPI01027601</a>  | 14574  | 60    | Tax_Id=10090 Gene_Symbol=Try5 14 kDa protein                                   |
| 6. <a href="#">IPI00403650</a>  | 26871  | 54    | Tax_Id=10090 Gene_Symbol=Prss2 Anionic trypsin-2                               |
| 7. <a href="#">IPI00228825</a>  | 129164 | 44    | Tax_Id=10090 Gene_Symbol=Ccdc150 Coiled-coil domain-containing protein 150     |
| 8. <a href="#">IPI00353583</a>  | 87342  | 43    | Tax_Id=10090 Gene_Symbol=Zfp735 zinc finger protein 735                        |
| 9. <a href="#">IPI00346603</a>  | 16383  | 43    | Tax_Id=10090 Gene_Symbol=2410004P03Rik hypothetical protein LOC73667 isoform 1 |
| 10. <a href="#">IPI00465762</a> | 32361  | 42    | Tax_Id=10090 Gene_Symbol=Pde5a Uncharacterized protein                         |

### Results List

1. [IPI00128108](#) Mass: 26941 Score: 177 Expect: 1.2e-013 Matches: 7  
Tax\_Id=10090 Gene\_Symbol=Try4 trypsin 4

**Observed Mr(expt) Mr(calc) ppm Start EndMiss Ions Peptide**

871.4160 870.4087 870.4096 -1.10 96 - 102 0 -- K.HPNFNSR.T  
925.4534 924.4461 924.4487 -2.86 24 - 31 0 -- K.IVGGYTCCR.E  
1041.6023 1040.5950 1040.5978 -2.70 113 - 122 0 42 K.LASPVTLNAR.V  
1190.6305 1189.6233 1189.6376 -12.09 103 - 112 0 -- R.TLNNDIMLIK.L + Oxidation (M)  
1225.6664 1224.6591 1224.6727 -11.13 93 - 102 1 -- K.IIKHPNFNSR.T  
1668.7802 1667.7729 1667.8011 -16.90 179 - 193 0 -- K.ITNNMICVGFLEGGK.D + Oxidation (M)  
2212.0798 2211.0725 2211.0920 -8.81 73 - 92 0 63 R.LGEHNINVLGNEQFVNSAK.I

**No match to:** 834.4235, 856.4715, 883.4145, 915.3925, 921.4268, 953.4425, 1028.5634, 1069.5866, 1080.5760, 1149.5935, 1196.6219, 1207.6077, 1212.6143, 1247.6057, 1527.7594, 1571.7673, 1614.7975, 1626.7846, 1635.8649, 1690.7765, 1834.7973, 2226.0862, 2234.0797, 2249.0713, 2277.0481

**2. IPI00759953 Mass: 26944 Score: 177 Expect: 1.2e-013 Matches: 7**

Tax\_Id=10090 Gene\_Symbol=Try5 trypsin 5

**Observed Mr(expt) Mr(calc) ppm Start EndMiss Ions Peptide**

871.4160 870.4087 870.4096 -1.10 96 - 102 0 -- K.HPNFNSR.T  
925.4534 924.4461 924.4487 -2.86 24 - 31 0 -- K.IVGGYTCCR.E  
1041.6023 1040.5950 1040.5978 -2.70 113 - 122 0 42 K.LASPVTLNAR.V  
1190.6305 1189.6233 1189.6376 -12.09 103 - 112 0 -- R.TLNNDIMLIK.L + Oxidation (M)  
1225.6664 1224.6591 1224.6727 -11.13 93 - 102 1 -- K.IIKHPNFNSR.T  
1668.7802 1667.7729 1667.8011 -16.90 179 - 193 0 -- K.ITNNMICVGFLEGGK.D + Oxidation (M)  
2212.0798 2211.0725 2211.0920 -8.81 73 - 92 0 63 R.LGEHNINVLGNEQFVNSAK.I

**No match to:** 834.4235, 856.4715, 883.4145, 915.3925, 921.4268, 953.4425, 1028.5634, 1069.5866, 1080.5760, 1149.5935, 1196.6219, 1207.6077, 1212.6143, 1247.6057, 1527.7594, 1571.7673, 1614.7975, 1626.7846, 1635.8649, 1690.7765, 1834.7973, 2226.0862, 2234.0797, 2249.0713, 2277.0481

**3. IPI00989590 Mass: 27961 Score: 176 Expect: 1.5e-013 Matches: 7**

Tax\_Id=10090 Gene\_Symbol=Try4 Uncharacterized protein

**Observed Mr(expt) Mr(calc) ppm Start EndMiss Ions Peptide**

871.4160 870.4087 870.4096 -1.10 96 - 102 0 -- K.HPNFNSR.T  
925.4534 924.4461 924.4487 -2.86 24 - 31 0 -- K.IVGGYTCCR.E  
1041.6023 1040.5950 1040.5978 -2.70 113 - 122 0 42 K.LASPVTLNAR.V  
1190.6305 1189.6233 1189.6376 -12.09 103 - 112 0 -- R.TLNNDIMLIK.L + Oxidation (M)  
1225.6664 1224.6591 1224.6727 -11.13 93 - 102 1 -- K.IIKHPNFNSR.T  
1668.7802 1667.7729 1667.8011 -16.90 179 - 193 0 -- K.ITNNMICVGFLEGGK.D + Oxidation (M)  
2212.0798 2211.0725 2211.0920 -8.81 73 - 92 0 63 R.LGEHNINVLGNEQFVNSAK.I

**No match to:** 834.4235, 856.4715, 883.4145, 915.3925, 921.4268, 953.4425, 1028.5634, 1069.5866, 1080.5760, 1149.5935, 1196.6219, 1207.6077, 1212.6143, 1247.6057, 1527.7594, 1571.7673, 1614.7975, 1626.7846, 1635.8649, 1690.7765, 1834.7973, 2226.0862, 2234.0797, 2249.0713, 2277.0481

**4. IPI00406464 Mass: 28002 Score: 176 Expect: 1.5e-013 Matches: 7**

Tax\_Id=10090 Gene\_Symbol=Try5 Putative uncharacterized protein

**Observed Mr(expt) Mr(calc) ppm Start EndMiss Ions Peptide**

871.4160 870.4087 870.4096 -1.10 96 - 102 0 --- K.HPNFNSR.T  
 925.4534 924.4461 924.4487 -2.86 24 - 31 0 --- K.IVGGYTCRE  
 1041.6023 1040.5950 1040.5978 -2.70 113 - 122 0 42 K.LASPVTLNAR.V  
 1190.6305 1189.6233 1189.6376 -12.09 103 - 112 0 --- R.TLNDIMLIK.L + Oxidation (M)  
 1225.6664 1224.6591 1224.6727 -11.13 93 - 102 1 --- K.IIKHPNFNSR.T  
 1668.7802 1667.7729 1667.8011 -16.90 179 - 193 0 --- K.ITNNMICVGFLEGGK.D + Oxidation (M)  
 2212.0798 2211.0725 2211.0920 -8.81 73 - 92 0 63 R.LGEHNINVLGNEQFVNSAK.I

**No match to:** 834.4235, 856.4715, 883.4145, 915.3925, 921.4268, 953.4425, 1028.5634, 1069.5866, 1080.5760, 1149.5935, 1196.6219, 1207.6077, 1212.6143, 1247.6057, 1527.7594, 1571.7673, 1614.7975, 1626.7846, 1635.8649, 1690.7765, 1834.7973, 2226.0862, 2234.0797, 2249.0713, 2277.0481

5. [IPI01027601](#) **Mass:** 14574 **Score:** 60 **Expect:** 0.061 **Matches:** 2

Tax\_Id=10090 Gene\_Symbol=Try5 14 kDa protein

**Observed Mr(expt) Mr(calc) ppm Start End Miss Ions Peptide**

1041.6023 1040.5950 1040.5978 -2.70 5 - 14 0 42 K.LASPVTLNAR.V  
 1668.7802 1667.7729 1667.8011 -16.90 71 - 85 0 --- K.ITNNMICVGFLEGGK.D + Oxidation (M)

**No match to:** 834.4235, 856.4715, 871.4160, 883.4145, 915.3925, 921.4268, 925.4534, 953.4425, 1028.5634, 1069.5866, 1080.5760, 1149.5935, 1190.6305, 1196.6219, 1207.6077, 1212.6143, 1225.6664, 1247.6057, 1527.7594, 1571.7673, 1614.7975, 1626.7846, 1635.8649, 1690.7765, 1834.7973, 2212.0798, 2226.0862, 2234.0797, 2249.0713, 2277.0481

6. [IPI00403650](#) **Mass:** 26871 **Score:** 54 **Expect:** 0.22 **Matches:** 2

Tax\_Id=10090 Gene\_Symbol=Prss2 Anionic trypsin-2

**Observed Mr(expt) Mr(calc) ppm Start End Miss Ions Peptide**

925.4534 924.4461 924.4487 -2.86 24 - 31 0 --- K.IVGGYTCRE  
 1041.6023 1040.5950 1040.5978 -2.70 113 - 122 0 42 K.LASPVTLNAR.V

**No match to:** 834.4235, 856.4715, 871.4160, 883.4145, 915.3925, 921.4268, 953.4425, 1028.5634, 1069.5866, 1080.5760, 1149.5935, 1190.6305, 1196.6219, 1207.6077, 1212.6143, 1225.6664, 1247.6057, 1527.7594, 1571.7673, 1614.7975, 1626.7846, 1635.8649, 1668.7802, 1690.7765, 1834.7973, 2212.0798, 2226.0862, 2234.0797, 2249.0713, 2277.0481

7. [IPI00228825](#) **Mass:** 129164 **Score:** 44 **Expect:** 2.7 **Matches:** 10

Tax\_Id=10090 Gene\_Symbol=Ccdc150 Coiled-coil domain-containing protein 150

**Observed Mr(expt) Mr(calc) ppm Start End Miss Ions Peptide**

1069.5866 1068.5793 1068.5273 48.6 570 - 578 1 --- K.NMLAYEKGLK.L + Oxidation (M)  
 1080.5760 1079.5687 1079.5723 -3.37 268 - 276 0 --- R.QQVHALQEK.C  
 1196.6219 1195.6146 1195.5907 20.0 962 - 971 0 --- R.FVSEMNTLQK.E  
 1212.6143 1211.6070 1211.5856 17.7 962 - 971 0 --- R.FVSEMNTLQK.E + Oxidation (M)  
 1225.6664 1224.6591 1224.5986 49.4 550 - 560 1 --- K.ATSDYQKVEK.A  
 1527.7594 1526.7521 1526.7473 3.20 119 - 130 0 --- R.MCYLENLIQSLK.M + Oxidation (M)  
 1635.8649 1634.8577 1634.8740 -9.98 834 - 847 1 --- K.VEAEHAERIEALR.K  
 1690.7765 1689.7692 1689.8396 -41.64 626 - 639 1 --- K.AYLEQTEAHLKEMK.S  
 2226.0862 2225.0789 2225.1804 -45.63 147 - 166 1 --- K.TAFLNDQLNIIQGEHSKGLK.L  
 2249.0713 2248.0640 2248.1310 -29.79 91 - 110 0 --- K.AISPIPNEVICPESPGNLWR.N

**No match to:** 834.4235, 856.4715, 871.4160, 883.4145, 915.3925, 921.4268, 925.4534, 953.4425, 1028.5634, 1041.6023, 1149.5935, 1190.6305,

1207.6077, 1247.6057, 1571.7673, 1614.7975, 1626.7846, 1668.7802, 1834.7973, 2212.0798, 2234.0797, 2277.0481

8. [IPI00353583](#) Mass: 87342 Score: 43 Expect: 2.7 Matches: 7

Tax\_Id=10090 Gene\_Symbol=Zfp735 zinc finger protein 735

**Observed Mr(expt) Mr(calc) ppm Start EndMiss Ions Peptide**

1041.6023 1040.5950 1040.5767 17.6 456 - 464 1 -- K.HSKYKPPGK.C  
1149.5935 1148.5863 1148.5826 3.21 267 - 276 0 -- R.VNDNNIGYIK.N  
1527.7594 1526.7521 1526.7954 -28.31 603 - 615 1 -- K.SFTQSSSLKIHHR.I  
1614.7975 1613.7903 1613.7542 22.4 465 - 478 0 -- K.CSSKPSGLMVFETR.G + Oxidation (M)  
1635.8649 1634.8577 1634.8277 18.3 575 - 587 1 -- K.YFTRSSNLQVHQR.V  
1668.7802 1667.7729 1667.7144 35.1 252 - 266 0 -- K.LGIYHMGSSCGNSNR.V + Oxidation (M)  
1834.7973 1833.7900 1833.8250 -19.09 616 - 630 1 -- R.IHTGDKPYRCNECGK.C

**No match to:** 834.4235, 856.4715, 871.4160, 883.4145, 915.3925, 921.4268, 925.4534, 953.4425, 1028.5634, 1069.5866, 1080.5760, 1190.6305, 1196.6219, 1207.6077, 1212.6143, 1225.6664, 1247.6057, 1571.7673, 1626.7846, 1690.7765, 2212.0798, 2226.0862, 2234.0797, 2249.0713, 2277.0481

9. [IPI00346603](#) Mass: 16383 Score: 43 Expect: 2.9 Matches: 4

Tax\_Id=10090 Gene\_Symbol=2410004P03Rik hypothetical protein LOC73667 isoform 1

**Observed Mr(expt) Mr(calc) ppm Start EndMiss Ions Peptide**

921.4268 920.4195 920.4239 -4.85 82 - 89 0 -- K.DYDPLGNK.K  
1196.6219 1195.6146 1195.6197 -4.22 140 - 149 1 -- K.RKPDELQPV.-  
1626.7846 1625.7773 1625.7661 6.89 125 - 138 0 -- K.ALGHMDFFFVEGTR.K  
2226.0862 2225.0789 2225.1012 -10.01 40 - 60 0 -- R.ALAGGCQGTALGVQQDQLWR.E

**No match to:** 834.4235, 856.4715, 871.4160, 883.4145, 915.3925, 925.4534, 953.4425, 1028.5634, 1041.6023, 1069.5866, 1080.5760, 1149.5935, 1190.6305, 1207.6077, 1212.6143, 1225.6664, 1247.6057, 1527.7594, 1571.7673, 1614.7975, 1635.8649, 1668.7802, 1690.7765, 1834.7973, 2212.0798, 2234.0797, 2249.0713, 2277.0481

10. [IPI00465762](#) Mass: 32361 Score: 42 Expect: 3.9 Matches: 6

Tax\_Id=10090 Gene\_Symbol=Pde5a Uncharacterized protein

**Observed Mr(expt) Mr(calc) ppm Start EndMiss Ions Peptide**

1080.5760 1079.5687 1079.5434 23.5 1 - 9 1 -- -.MLPFGDKTR.D + Oxidation (M)  
1190.6305 1189.6233 1189.6199 2.83 221 - 230 0 -- K.TQSILCMPIK.N  
1196.6219 1195.6146 1195.6383 -19.79 89 - 98 1 -- K.KEQMPLTPPR.F  
1212.6143 1211.6070 1211.6332 -21.64 89 - 98 1 -- K.KEQMPLTPPR.F + Oxidation (M)  
1527.7594 1526.7521 1526.6936 38.3 8 - 19 1 -- K.TRDMVNAWFSEK.V + Oxidation (M)  
1690.7765 1689.7692 1689.7920 -13.49 143 - 156 1 -- R.YSLFLVCESSKDK.F

**No match to:** 834.4235, 856.4715, 871.4160, 883.4145, 915.3925, 921.4268, 925.4534, 953.4425, 1028.5634, 1041.6023, 1069.5866, 1149.5935, 1207.6077, 1225.6664, 1247.6057, 1571.7673, 1614.7975, 1626.7846, 1635.8649, 1668.7802, 1834.7973, 2212.0798, 2226.0862, 2234.0797, 2249.0713, 2277.0481

**Search Parameters**

Type of search : MS/MS Ion Search

Enzyme : Trypsin

Fixed modifications : Carbamidomethyl (C)

Variable modifications : Oxidation (M)

Mass values : Monoisotopic

Protein Mass : Unrestricted

Peptide Mass Tolerance :  $\pm 50$  ppm

Fragment Mass Tolerance:  $\pm 0.6$  Da

Max Missed Cleavages : 1

Instrument type : MALDI-TOF-TOF

Query1 (834.4235,1+) : <no title>

Query2 (856.4715,1+) : <no title>

Query3 (871.4160,1+) : <no title>

Query4 (883.4145,1+) : <no title>

Query5 (915.3925,1+) : <no title>

Query6 (921.4268,1+) : <no title>

Query7 (925.4534,1+) : <no title>

Query8 (953.4425,1+) : <no title>

Query9 (1028.5634,1+) : <no title>

Query10 (1041.6023,1+) : <no title>

Query11 (1069.5866,1+) : <no title>

Query12 (1080.5760,1+) : <no title>

Query13 (1149.5935,1+) : <no title>

Query14 (1190.6305,1+) : <no title>

Query15 (1196.6219,1+) : <no title>

Query16 (1207.6077,1+) : <no title>

Query17 (1212.6143,1+) : <no title>

Query18 (1225.6664,1+) : <no title>

Query19 (1247.6057,1+) : <no title>

Query20 (1527.7594,1+) : <no title>

Query21 (1571.7673,1+) : <no title>

Query22 (1614.7975,1+) : <no title>

Query23 (1626.7846,1+) : <no title>

Query24 (1635.8649,1+) : <no title>

Query25 (1668.7802,1+) : <no title>

Query26 (1690.7765,1+) : <no title>

Query27 (1834.7973,1+) : <no title>

Query28 (2212.0798,1+) : <no title>

Query29 (2226.0862,1+) : <no title>

Query30 (2234.0797,1+) : <no title>

Query31 (2249.0713,1+) : <no title>

Query32 (2277.0481,1+) : <no title>

Mascot: <http://www.matrixscience.com/>

# **MASCOT** Mascot Search Results **SCIENCE**

User :  
Email :  
Search title : Auto submitted by BioTools  
Database : SwissProt 57.15 (515203 sequences; 181334896 residues)  
Taxonomy : Mus. (16281 sequences)  
Timestamp : 22 Nov 2010 at 05:08:11 GMT  
Warning : A Peptide summary report will usually give a much clearer picture of MS/MS search results.  
Top Score : 290 for DCTN2\_MOUSE, Dynactin subunit 2 OS=Mus musculus GN=Dctn2 PE=1 SV=3

## Mascot Score Histogram

Protein score is  $-10 \cdot \log(P)$ , where P is the probability that the observed match is a random event.

Protein scores greater than 55 are significant ( $p < 0.05$ ).

Protein scores are derived from ions scores as a non-probabilistic basis for ranking protein hits.

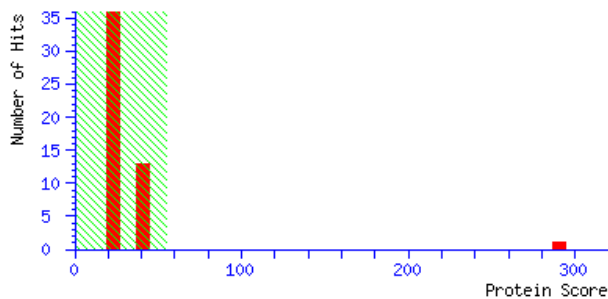

## Protein Summary Report

### Index

| Accession                       | Mass   | Score | Description                                                                              |
|---------------------------------|--------|-------|------------------------------------------------------------------------------------------|
| 1. <a href="#">DCTN2_MOUSE</a>  | 44204  | 290   | Dynactin subunit 2 OS=Mus musculus GN=Dctn2 PE=1 SV=3                                    |
| 2. <a href="#">EF2_MOUSE</a>    | 96222  | 48    | Elongation factor 2 OS=Mus musculus GN=Eef2 PE=1 SV=2                                    |
| 3. <a href="#">LYPA1_MOUSE</a>  | 25014  | 41    | Acyl-protein thioesterase 1 OS=Mus musculus GN=Lypla1 PE=1 SV=1                          |
| 4. <a href="#">DOK5_MOUSE</a>   | 35887  | 38    | Docking protein 5 OS=Mus musculus GN=Dok5 PE=1 SV=1                                      |
| 5. <a href="#">RGS5_MOUSE</a>   | 21243  | 36    | Regulator of G-protein signaling 5 OS=Mus musculus GN=Rgs5 PE=2 SV=2                     |
| 6. <a href="#">LITD1_MOUSE</a>  | 88705  | 36    | LINE-1 type transposase domain-containing protein 1 OS=Mus musculus GN=L1td1 PE=2 SV=1   |
| 7. <a href="#">ECE1_MOUSE</a>   | 87815  | 35    | Endothelin-converting enzyme 1 OS=Mus musculus GN=Ece1 PE=1 SV=1                         |
| 8. <a href="#">ZNF32_MOUSE</a>  | 31722  | 35    | Zinc finger protein 32 OS=Mus musculus GN=Znf32 PE=2 SV=1                                |
| 9. <a href="#">UN45A_MOUSE</a>  | 104579 | 35    | Protein unc-45 homolog A OS=Mus musculus GN=Unc45a PE=1 SV=2                             |
| 10. <a href="#">ADCK3_MOUSE</a> | 72154  | 33    | Chaperone activity of bc1 complex-like, mitochondrial OS=Mus musculus GN=Cabc1 PE=2 SV=2 |

## Results List



1. DCTN2\_MOUSE Mass: 44204 Score: 290 Expect: 1.6e-025 Matches: 9

Dynactin subunit 2 OS=Mus musculus GN=Dctn2 PE=1 SV=3

| Observed  | Mr(expt)  | Mr(calc)  | ppm    | Start | End | Miss | Ions | Peptide                       |
|-----------|-----------|-----------|--------|-------|-----|------|------|-------------------------------|
| 1031.5698 | 1030.5625 | 1030.5659 | -3.24  | 232   | -   | 240  | 0    | --- R.LTELEATVR.C             |
| 1187.6731 | 1186.6658 | 1186.6670 | -0.95  | 231   | -   | 240  | 1    | --- K.RLTELEATVR.C            |
| 1286.6832 | 1285.6760 | 1285.6779 | -1.49  | 310   | -   | 319  | 0    | 94 K.VHQLYETIQR.W             |
| 1582.8429 | 1581.8357 | 1581.8515 | -10.00 | 320   | -   | 333  | 0    | --- R.WSPVASTLPELVQR.L        |
| 1591.8073 | 1590.8001 | 1590.8036 | -2.20  | 367   | -   | 380  | 0    | --- K.DNTALLTQVQTTMR.E        |
| 1598.8709 | 1597.8636 | 1597.8675 | -2.42  | 269   | -   | 283  | 0    | 100 K.VSALDLAVLDQVEAR.L       |
| 1614.8438 | 1613.8365 | 1613.8876 | -31.62 | 126   | -   | 140  | 1    | --- K.ESATEEKLTPVVLAK.Q       |
| 1706.8285 | 1705.8212 | 1705.8271 | -3.45  | 381   | -   | 396  | 0    | --- R.ENLATVEGNFASIDAR.M      |
| 2445.1896 | 2444.1823 | 2444.1932 | -4.43  | 299   | -   | 319  | 1    | --- K.ASVEDADTQNKVHQLYETIQR.W |

No match to: 856.5338, 880.4595, 964.5179, 969.5360, 1075.5849, 1138.5175, 1208.5276, 1238.6039, 1300.6947, 1642.8340, 1688.8164, 1742.8382, 1790.8980, 1837.1934, 1852.9114, 1870.9342, 2143.0553

2. EF2\_MOUSE Mass: 96222 Score: 48 Expect: 0.27 Matches: 8

Elongation factor 2 OS=Mus musculus GN=Eef2 PE=1 SV=2

| Observed  | Mr(expt)  | Mr(calc)  | ppm    | Start | End | Miss | Ions | Peptide                                |
|-----------|-----------|-----------|--------|-------|-----|------|------|----------------------------------------|
| 880.4595  | 879.4522  | 879.4194  | 37.4   | 253   | -   | 259  | 1    | --- K.VEDMMKK.L                        |
| 969.5360  | 968.5287  | 968.5403  | -12.02 | 717   | -   | 726  | 0    | --- R.GGGQIIPAR.R                      |
| 1138.5175 | 1137.5103 | 1137.5091 | 1.05   | 639   | -   | 647  | 0    | --- K.YEWDVAEAR.K                      |
| 1208.5276 | 1207.5204 | 1207.4961 | 20.1   | 689   | -   | 698  | 0    | --- K.EGALCEENMR.G                     |
| 1238.6039 | 1237.5966 | 1237.6125 | -12.84 | 1     | -   | 10   | 0    | --- -.MVNFTVDQIR.A + Oxidation (M)     |
| 1642.8340 | 1641.8267 | 1641.7565 | 42.8   | 387   | -   | 400  | 1    | --- K.SCDPKGPLMMYISK.M + Oxidation (M) |
| 1742.8382 | 1741.8309 | 1741.8311 | -0.12  | 634   | -   | 647  | 1    | --- R.YLAEKYEWDAEAR.K                  |
| 2143.0553 | 2142.0480 | 2142.0705 | -10.50 | 606   | -   | 625  | 1    | --- K.ARPFPDGLAEDIDKGEVSAR.Q           |

No match to: 856.5338, 964.5179, 1031.5698, 1075.5849, 1187.6731, 1286.6832, 1300.6947, 1582.8429, 1591.8073, 1598.8709, 1614.8438, 1688.8164, 1706.8285, 1790.8980, 1837.1934, 1852.9114, 1870.9342, 2445.1896

3. LYPAL\_MOUSE Mass: 25014 Score: 41 Expect: 1.3 Matches: 4

Acyl-protein thioesterase 1 OS=Mus musculus GN=Lypal1 PE=1 SV=1

| Observed  | Mr(expt)  | Mr(calc)  | ppm    | Start | End | Miss | Ions | Peptide                     |
|-----------|-----------|-----------|--------|-------|-----|------|------|-----------------------------|
| 1187.6731 | 1186.6658 | 1186.6710 | -4.34  | 191   | -   | 201  | 0    | --- K.ALINPANVTFK.I         |
| 1642.8340 | 1641.8267 | 1641.8937 | -40.83 | 91    | -   | 105  | 1    | --- K.QAAETVKALIDQEVK.N     |
| 1742.8382 | 1741.8309 | 1741.8062 | 14.2   | 2     | -   | 18   | 0    | --- M.CGNNMSAPMPAVVPAAR.K   |
| 1870.9342 | 1869.9269 | 1869.9012 | 13.8   | 2     | -   | 19   | 1    | --- M.CGNNMSAPMPAVVPAAR.K.A |

No match to: 856.5338, 880.4595, 964.5179, 969.5360, 1031.5698, 1075.5849, 1138.5175, 1208.5276, 1238.6039, 1286.6832, 1300.6947, 1582.8429, 1591.8073, 1598.8709, 1614.8438, 1688.8164, 1706.8285, 1790.8980, 1837.1934, 1852.9114, 2143.0553, 2445.1896

4. DOK5\_MOUSE Mass: 35887 Score: 38 Expect: 2.3 Matches: 5

Docking protein 5 OS=Mus musculus GN=Dok5 PE=1 SV=1

| Observed  | Mr(expt)  | Mr(calc)  | ppm    | Start | End | Miss | Ions | Peptide            |
|-----------|-----------|-----------|--------|-------|-----|------|------|--------------------|
| 1138.5175 | 1137.5103 | 1137.5488 | -33.91 | 1     | -   | 10   | 0    | --- -.MASNFNDIVK.Q |

1208.5276 1207.5204 1207.5689 -40.23 106 - 115 0 --- K.VLQMECVGTR.I + Oxidation (M)

1582.8429 1581.8357 1581.8490 -8.42 21 - 32 1 --- R.LGIYQRCWLVFK.K

1688.8164 1687.8091 1687.7698 23.3 201 - 214 0 --- R.MCETGEGLFIFQTR.D

1706.8285 1705.8212 1705.7849 21.3 187 - 200 1 --- R.YGRDITWTFEAGR.M

**No match to:** 856.5338, 880.4595, 964.5179, 969.5360, 1031.5698, 1075.5849, 1187.6731, 1238.6039, 1286.6832, 1300.6947, 1591.8073, 1598.8709, 1614.8438, 1642.8340, 1742.8382, 1790.8980, 1837.1934, 1852.9114, 1870.9342, 2143.0553, 2445.1896

5. RGS5\_MOUSE Mass: 21243 Score: 36 Expect: 3.8 Matches: 4

Regulator of G-protein signaling 5 OS=Mus musculus GN=Rgs5 PE=2 SV=2

**Observed Mr(expt) Mr(calc) ppm Start End Miss Ions Peptide**

964.5179 963.5106 963.5138 -3.28 150 - 157 1 --- R.SFDLAQKR.I

1075.5849 1074.5776 1074.5498 25.9 170 - 177 1 --- R.FVRSEFYK.E

1706.8285 1705.8212 1705.8345 -7.80 128 - 141 1 --- K.EVNIDHFTKDITMK.N + Oxidation (M)

1742.8382 1741.8309 1741.8426 -6.71 1 - 15 1 --- -.MCKGLAALPHSCLER.A

**No match to:** 856.5338, 880.4595, 969.5360, 1031.5698, 1138.5175, 1187.6731, 1208.5276, 1238.6039, 1286.6832, 1300.6947, 1582.8429, 1591.8073, 1598.8709, 1614.8438, 1642.8340, 1688.8164, 1790.8980, 1837.1934, 1852.9114, 1870.9342, 2143.0553, 2445.1896

6. LITD1\_MOUSE Mass: 88705 Score: 36 Expect: 4.2 Matches: 5

LINE-1 type transposase domain-containing protein 1 OS=Mus musculus GN=L1td1 PE=2 SV=1

**Observed Mr(expt) Mr(calc) ppm Start End Miss Ions Peptide**

1138.5175 1137.5103 1137.5639 -47.16 147 - 157 1 --- R.GGEALRGEHGR.C

1286.6832 1285.6760 1285.7289 -41.15 538 - 548 1 --- R.GVISVIRQMQR.E

1598.8709 1597.8637 1597.8788 -9.45 708 - 722 1 9 K.IRLTADLSPGTIDAR.S

1706.8285 1705.8212 1705.8522 -18.19 524 - 537 1 --- K.EADLILETEENFKR.G

1790.8980 1789.8907 1789.9284 -21.05 231 - 245 1 --- K.ELEPELQCSVKLAFK.C

**No match to:** 856.5338, 880.4595, 964.5179, 969.5360, 1031.5698, 1075.5849, 1187.6731, 1208.5276, 1238.6039, 1300.6947, 1582.8429, 1591.8073, 1614.8438, 1642.8340, 1688.8164, 1742.8382, 1837.1934, 1852.9114, 1870.9342, 2143.0553, 2445.1896

7. ECE1\_MOUSE Mass: 87815 Score: 35 Expect: 4.7 Matches: 7

Endothelin-converting enzyme 1 OS=Mus musculus GN=Ece1 PE=1 SV=1

**Observed Mr(expt) Mr(calc) ppm Start End Miss Ions Peptide**

1138.5175 1137.5103 1137.4873 20.2 483 - 490 1 --- K.WMDEETRR.S + Oxidation (M)

1187.6731 1186.6658 1186.6631 2.31 195 - 204 0 --- R.AKPLMELIEK.L + Oxidation (M)

1598.8709 1597.8636 1597.8538 6.17 276 - 289 0 --- K.VLTGYLNYMVQLGK.L

1614.8438 1613.8365 1613.8487 -7.54 276 - 289 0 --- K.VLTGYLNYMVQLGK.L + Oxidation (M)

1706.8285 1705.8212 1705.8212 -0.01 618 - 630 1 --- R.EYDKDGNLRPWWK.N

1742.8382 1741.8309 1741.8102 11.9 387 - 399 0 --- K.CLLNNYMMWNLVR.K + Oxidation (M)

1870.9342 1869.9269 1869.9052 11.6 387 - 400 1 --- K.CLLNNYMMWNLVRK.T + Oxidation (M)

**No match to:** 856.5338, 880.4595, 964.5179, 969.5360, 1031.5698, 1075.5849, 1208.5276, 1238.6039, 1286.6832, 1300.6947, 1582.8429, 1591.8073, 1642.8340, 1688.8164, 1790.8980, 1837.1934, 1852.9114, 2143.0553, 2445.1896

8. ZNF32\_MOUSE Mass: 31722 Score: 35 Expect: 5 Matches: 4

Zinc finger protein 32 OS=Mus musculus GN=Zn32 PE=2 SV=1

**Observed Mr(expt) Mr(calc) ppm Start End Miss Ions Peptide**

964.5179 963.5106 963.4808 31.0 265 - 272 1 --- R.SCSQRLTL-  
1591.8073 1590.8001 1590.7613 24.4 2 - 15 0 --- M.FGFPTATLLDCHGR.Y  
1706.8285 1705.8212 1705.7552 38.7 237 - 251 0 --- K.VHTGETPYLCGQCGK.S  
1790.8980 1789.8907 1789.8240 37.3 97 - 111 0 --- R.IHTGQKPFECTQCGK.S

**No match to:** 856.5338, 880.4595, 969.5360, 1031.5698, 1075.5849, 1138.5175, 1187.6731, 1208.5276, 1238.6039, 1286.6832, 1300.6947, 1582.8429, 1598.8709, 1614.8438, 1642.8340, 1688.8164, 1742.8382, 1837.1934, 1852.9114, 1870.9342, 2143.0553, 2445.1896

**9. UN45A MOUSE Mass: 104579 Score: 35 Expect: 5.5 Matches: 7**

Protein unc-45 homolog A OS=Mus musculus GN=Unc45a PE=1 SV=2

**Observed Mr(expt) Mr(calc) ppm Start End Miss Ions Peptide**

964.5179 963.5106 963.5025 8.39 26 - 33 1 --- R.KEGNELFK.C  
969.5360 968.5287 968.4974 32.3 63 - 70 1 --- R.NRAACHLK.L  
1031.5698 1030.5625 1030.5295 32.1 84 - 93 1 --- K.AIEKDGGDVK.A  
1075.5849 1074.5776 1074.5934 -14.69 627 - 635 1 --- K.DKPSFVRAR.V  
1582.8429 1581.8357 1581.7929 27.1 639 - 653 0 --- K.LLAAGVVSAMTCMVK.T + 2 Oxidation (M)  
1688.8164 1687.8091 1687.8199 -6.41 915 - 930 1 --- K.GEESPVTRAAAACLEK.A  
1790.8980 1789.8907 1789.9574 -37.25 822 - 836 1 --- K.LLVLYSGEDELRRR.A

**No match to:** 856.5338, 880.4595, 1138.5175, 1187.6731, 1208.5276, 1238.6039, 1286.6832, 1300.6947, 1591.8073, 1598.8709, 1614.8438, 1642.8340, 1706.8285, 1742.8382, 1837.1934, 1852.9114, 1870.9342, 2143.0553, 2445.1896

**10. ADCK3 MOUSE Mass: 72154 Score: 33 Expect: 7.4 Matches: 5**

Chaperone activity of bcl complex-like, mitochondrial OS=Mus musculus GN=Cabcl PE=2 SV=2

**Observed Mr(expt) Mr(calc) ppm Start End Miss Ions Peptide**

1075.5849 1074.5776 1074.6219 -41.25 260 - 268 1 --- R.IVSTLCKVR.G  
1286.6832 1285.6760 1285.6626 10.4 525 - 536 1 --- R.AAADQDREAVLK.K  
1591.8073 1590.8001 1590.8473 -29.70 2 - 17 1 --- M.AAMLGDAIMVAKGLAK.L + 2 Oxidation (M)  
1706.8285 1705.8212 1705.8929 -42.01 1 - 17 1 --- -.MAAMLGDAIMVAKGLAK.L + Oxidation (M)  
1742.8382 1741.8309 1741.8709 -22.98 42 - 57 0 --- R.ALQSTAVEQFSMVFGK.V

**No match to:** 856.5338, 880.4595, 964.5179, 969.5360, 1031.5698, 1138.5175, 1187.6731, 1208.5276, 1238.6039, 1300.6947, 1582.8429, 1598.8709, 1614.8438, 1642.8340, 1688.8164, 1790.8980, 1837.1934, 1852.9114, 1870.9342, 2143.0553, 2445.1896

**Search Parameters**

**Type of search** : MS/MS Ion Search

**Enzyme** : Trypsin

**Fixed modifications** : Carbamidomethyl (C)

**Variable modifications** : Oxidation (M)

**Mass values** : Monoisotopic

**Protein Mass** : Unrestricted

**Peptide Mass Tolerance** :  $\pm 50$  ppm

**Fragment Mass Tolerance**:  $\pm 0.6$  Da

**Max Missed Cleavages** : 1

**Instrument type** : MALDI-TOF-TOF

Query1 (856.5338,1+) : <no title>  
Query2 (880.4595,1+) : <no title>  
Query3 (964.5179,1+) : <no title>  
Query4 (969.5360,1+) : <no title>  
Query5 (1031.5698,1+) : <no title>  
Query6 (1075.5849,1+) : <no title>  
Query7 (1138.5175,1+) : <no title>  
Query8 (1187.6731,1+) : <no title>  
Query9 (1208.5276,1+) : <no title>  
Query10 (1238.6039,1+) : <no title>  
Query11 (1286.6832,1+) : <no title>  
Query12 (1300.6947,1+) : <no title>  
Query13 (1582.8429,1+) : <no title>  
Query14 (1591.8073,1+) : <no title>  
Query15 (1598.8709,1+) : <no title>  
Query16 (1614.8438,1+) : <no title>  
Query17 (1642.8340,1+) : <no title>  
Query18 (1688.8164,1+) : <no title>  
Query19 (1706.8285,1+) : <no title>  
Query20 (1742.8382,1+) : <no title>  
Query21 (1790.8980,1+) : <no title>  
Query22 (1837.1934,1+) : <no title>  
Query23 (1852.9114,1+) : <no title>  
Query24 (1870.9342,1+) : <no title>  
Query25 (2143.0553,1+) : <no title>  
Query26 (2445.1896,1+) : <no title>

**Mascot:** <http://www.matrixscience.com/>

# **MASCOT** Mascot Search Results **SCIENCE**

User :  
Email :  
Search title : Auto submitted by BioTools  
Database : SwissProt 57.15 (515203 sequences; 181334896 residues)  
Taxonomy : Mus. (16281 sequences)  
Timestamp : 22 Nov 2013 at 05:07:53 GMT  
Warning : A Peptide summary report will usually give a much clearer picture of MS/MS search results.  
Top Score : 132 for PRDX2\_MOUSE, Peroxiredoxin-2 OS=Mus musculus GN=Prdx2 PE=1 SV=3

## Mascot Score Histogram

Protein score is  $-10 \cdot \log(P)$ , where P is the probability that the observed match is a random event.

Protein scores greater than 55 are significant ( $p < 0.05$ ).

Protein scores are derived from ions scores as a non-probabilistic basis for ranking protein hits.

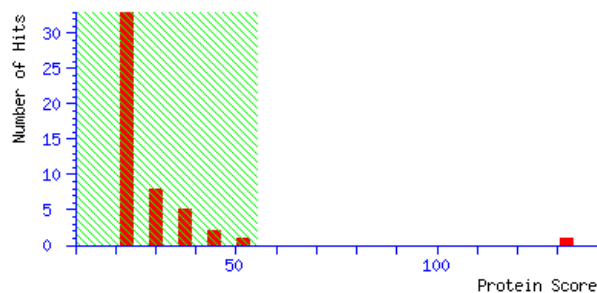

## Protein Summary Report

### Index

| Accession                       | Mass   | Score | Description                                                                        |
|---------------------------------|--------|-------|------------------------------------------------------------------------------------|
| 1. <a href="#">PRDX2_MOUSE</a>  | 21936  | 132   | Peroxiredoxin-2 OS=Mus musculus GN=Prdx2 PE=1 SV=3                                 |
| 2. <a href="#">RASL1_MOUSE</a>  | 90285  | 49    | RasGAP-activating-like protein 1 OS=Mus musculus GN=Rasal1 PE=2 SV=1               |
| 3. <a href="#">WNT10A_MOUSE</a> | 47793  | 48    | Protein Wnt-10a OS=Mus musculus GN=Wnt10a PE=2 SV=1                                |
| 4. <a href="#">CA158_MOUSE</a>  | 22924  | 47    | Uncharacterized protein C1orf158 homolog OS=Mus musculus PE=2 SV=1                 |
| 5. <a href="#">WDR93_MOUSE</a>  | 79715  | 38    | WD repeat-containing protein 93 OS=Mus musculus GN=Wdr93 PE=2 SV=1                 |
| 6. <a href="#">DOCK5_MOUSE</a>  | 215405 | 36    | Dedicator of cytokinesis protein 5 OS=Mus musculus GN=Dock5 PE=1 SV=1              |
| 7. <a href="#">FHAD1_MOUSE</a>  | 164538 | 36    | Forkhead-associated domain-containing protein 1 OS=Mus musculus GN=Fhad1 PE=2 SV=1 |
| 8. <a href="#">TUBB5_MOUSE</a>  | 50095  | 35    | Tubulin beta-5 chain OS=Mus musculus GN=Tubb5 PE=1 SV=1                            |
| 9. <a href="#">TUBB2C_MOUSE</a> | 50255  | 35    | Tubulin beta-2C chain OS=Mus musculus GN=Tubb2c PE=1 SV=1                          |
| 10. <a href="#">CSDC2_MOUSE</a> | 16931  | 33    | Cold shock domain-containing protein C2 OS=Mus musculus GN=Csdc2 PE=2 SV=1         |

## Results List

1. PRDX2\_MOUSE Mass: 21936 Score: 132 Expect: 1e-009 Matches: 3

Peroxiredoxin-2 OS=Mus musculus GN=Prdx2 PE=1 SV=3

**Observed Mr(expt) Mr(calc) ppm Start End Miss Ions Peptide**

937.4434 936.4361 936.4301 6.44 120 - 127 0 45 K.NDEGIAYR.G  
1108.5864 1107.5791 1107.5924 -12.01 110 - 119 0 --- K.SLSQNYGVLK.N  
1211.6691 1210.6618 1210.6670 -4.28 140 - 150 0 55 R.QITVNDLPVGR.S

**No match to:** 856.5211, 898.5019, 1028.5319, 1039.5844, 1077.5448, 1089.5870, 1130.5804, 1194.6404, 1419.7561, 1618.7694, 1728.9244, 1857.0366, 1988.9957

2. RASL1\_MOUSE Mass: 90285 Score: 49 Expect: 0.2 Matches: 6

RasGAP-activating-like protein 1 OS=Mus musculus GN=Rasal1 PE=2 SV=1

**Observed Mr(expt) Mr(calc) ppm Start End Miss Ions Peptide**

898.5019 897.4946 897.4821 14.0 592 - 598 1 --- R.YFRLSGR.D  
1028.5319 1027.5246 1027.5298 -5.08 188 - 197 0 --- R.EAPGTTSPLR.V  
1039.5844 1038.5771 1038.6186 -39.90 11 - 20 1 --- R.VVEGRALPAK.D  
1077.5448 1076.5375 1076.5251 11.5 333 - 341 0 --- R.TNDPNTLFR.S  
1211.6691 1210.6618 1210.7146 -43.59 732 - 741 1 2 R.QLLLGRDQLR.L  
1618.7694 1617.7621 1617.8151 -32.74 160 - 173 0 --- R.VFWGNHSLETSTIK.K

**No match to:** 856.5211, 937.4434, 1089.5870, 1108.5864, 1130.5804, 1194.6404, 1419.7561, 1728.9244, 1857.0366, 1988.9957

3. WN10A\_MOUSE Mass: 47793 Score: 48 Expect: 0.25 Matches: 5

Protein Wnt-10a OS=Mus musculus GN=Wnt10a PE=2 SV=1

**Observed Mr(expt) Mr(calc) ppm Start End Miss Ions Peptide**

898.5019 897.4946 897.4603 38.3 237 - 243 1 --- R.DIHARMR.L  
937.4434 936.4361 936.4157 21.8 71 - 77 0 --- R.QMEVCVR.H + Oxidation (M)  
1077.5448 1076.5375 1076.5219 14.5 70 - 77 1 --- R.RQMEVCVR.H  
1130.5804 1129.5731 1129.5741 -0.84 233 - 241 1 --- R.EPHRDIHAR.M  
1194.6404 1193.6331 1193.6081 21.0 116 - 125 0 --- K.VPYESPFSR.G

**No match to:** 856.5211, 1028.5319, 1039.5844, 1089.5870, 1108.5864, 1211.6691, 1419.7561, 1618.7694, 1728.9244, 1857.0366, 1988.9957

4. CA158\_MOUSE Mass: 22924 Score: 47 Expect: 0.34 Matches: 4

Uncharacterized protein C1orf158 homolog OS=Mus musculus PE=2 SV=1

**Observed Mr(expt) Mr(calc) ppm Start End Miss Ions Peptide**

898.5019 897.4946 897.5324 -42.03 122 - 128 0 --- K.LLWLPEK.S  
1089.5870 1088.5798 1088.5583 19.7 169 - 177 1 --- R.LPVCAMSRR.E  
1857.0366 1856.0293 1856.0533 -12.91 178 - 193 1 --- R.EHAIPVPHRLQPIPR.F  
1988.9957 1987.9884 1987.9574 15.6 52 - 67 1 --- R.KEYVPMPDHRPDFVSR.W + Oxidation (M)

**No match to:** 856.5211, 937.4434, 1028.5319, 1039.5844, 1077.5448, 1108.5864, 1130.5804, 1194.6404, 1211.6691, 1419.7561, 1618.7694, 1728.9244

5. WDR93\_MOUSE Mass: 79715 Score: 38 Expect: 2.4 Matches: 5

WD repeat-containing protein 93 OS=Mus musculus GN=Wdr93 PE=2 SV=1

**Observed Mr(expt) Mr(calc) ppm Start End Miss Ions Peptide**

898.5019 897.4946 897.4630 35.3 684 - 690 0 --- K.YSIMLQK.E + Oxidation (M)  
 1039.5844 1038.5771 1038.6113 -32.95 134 - 141 1 --- R.IYVLEKFK.A  
 1077.5448 1076.5375 1076.4986 36.2 182 - 191 0 --- K.AINEVDDSSK.Q  
 1194.6404 1193.6331 1193.5962 31.0 554 - 564 0 --- R.SQSVTLMDVAK.A + Oxidation (M)  
 1211.6691 1210.6618 1210.6050 47.0 664 - 673 1 --- K.SIQMTKTQMK.G + Oxidation (M)  
**No match to:** 856.5211, 937.4434, 1028.5319, 1089.5870, 1108.5864, 1130.5804, 1419.7561, 1618.7694, 1728.9244, 1857.0366, 1988.9957

**6. DOCK5\_MOUSE** Mass: 215405 Score: 36 Expect: 4 Matches: 7

Dedicator of cytokinesis protein 5 OS=Mus musculus GN=Dock5 PE=1 SV=1

| Observed  | Mr(expt)  | Mr(calc)  | ppm    | Start | End    | Miss | Ions | Peptide                               |
|-----------|-----------|-----------|--------|-------|--------|------|------|---------------------------------------|
| 1077.5448 | 1076.5375 | 1076.5098 | 25.7   | 1722  | - 1730 | 1    | ---  | K.EDSENRIK.F                          |
| 1130.5804 | 1129.5731 | 1129.6131 | -35.44 | 1844  | - 1854 | 1    | ---  | R.DSKAPPPPPK.A                        |
| 1211.6691 | 1210.6618 | 1210.6921 | -25.05 | 405   | - 415  | 0    | ---  | K.LLPGLTQVQK.N                        |
| 1419.7561 | 1418.7489 | 1418.7994 | -35.59 | 1831  | - 1843 | 1    | ---  | R.NSAEIAPPLPVR.R                      |
| 1728.9244 | 1727.9171 | 1727.8380 | 45.8   | 1456  | - 1469 | 0    | ---  | R.ANEVQQFSYRPF.R                      |
| 1857.0366 | 1856.0293 | 1855.9615 | 36.6   | 320   | - 336  | 0    | ---  | R.RPFGVAVMDISDIVHGK.V + Oxidation (M) |
| 1988.9957 | 1987.9884 | 1987.9067 | 41.1   | 1005  | - 1019 | 1    | ---  | K.DWMVMNMTQNRVFLR.A + 3 Oxidation (M) |

**No match to:** 856.5211, 898.5019, 937.4434, 1028.5319, 1039.5844, 1089.5870, 1108.5864, 1194.6404, 1618.7694

**7. FHAD1\_MOUSE** Mass: 164538 Score: 36 Expect: 4.3 Matches: 7

Forkhead-associated domain-containing protein 1 OS=Mus musculus GN=Fhad1 PE=2 SV=1

| Observed  | Mr(expt)  | Mr(calc)  | ppm    | Start | End    | Miss | Ions | Peptide                              |
|-----------|-----------|-----------|--------|-------|--------|------|------|--------------------------------------|
| 856.5211  | 855.5139  | 855.5290  | -17.72 | 1049  | - 1055 | 1    | ---  | K.VLREALR.A                          |
| 1077.5448 | 1076.5375 | 1076.5536 | -14.96 | 1033  | - 1042 | 0    | ---  | K.VAQTGLMEK.K                        |
| 1108.5864 | 1107.5791 | 1107.5594 | 17.8   | 860   | - 868  | 1    | ---  | K.TKMILTDLR.L + Oxidation (M)        |
| 1618.7694 | 1617.7621 | 1617.8396 | -47.85 | 291   | - 304  | 1    | ---  | K.EIESMKSQINALQK.G                   |
| 1728.9244 | 1727.9171 | 1727.8955 | 12.5   | 1144  | - 1157 | 1    | ---  | K.DHVNESFLELRTL.R                    |
| 1857.0366 | 1856.0293 | 1855.9787 | 27.3   | 1215  | - 1230 | 1    | ---  | K.LYTDMIKTLGSLMNIK.D + Oxidation (M) |
| 1988.9957 | 1987.9884 | 1988.0551 | -33.55 | 1056  | - 1072 | 0    | ---  | R.ASQEKPRPHLSTEQKPR.T                |

**No match to:** 898.5019, 937.4434, 1028.5319, 1039.5844, 1089.5870, 1130.5804, 1194.6404, 1211.6691, 1419.7561

**8. TBB5\_MOUSE** Mass: 50095 Score: 35 Expect: 5.5 Matches: 4

Tubulin beta-5 chain OS=Mus musculus GN=Tubb5 PE=1 SV=1

| Observed  | Mr(expt)  | Mr(calc)  | ppm    | Start | End   | Miss | Ions | Peptide        |
|-----------|-----------|-----------|--------|-------|-------|------|------|----------------|
| 1028.5319 | 1027.5246 | 1027.5121 | 12.2   | 351   | - 359 | 0    | ---  | K.TAVCDIPPR.G  |
| 1039.5844 | 1038.5771 | 1038.5862 | -8.75  | 310   | - 318 | 0    | ---  | R.YLTVAAVFR.G  |
| 1077.5448 | 1076.5375 | 1076.5250 | 11.6   | 155   | - 162 | 1    | ---  | K.IREEYPDR.I   |
| 1130.5804 | 1129.5731 | 1129.5880 | -13.18 | 242   | - 251 | 0    | ---  | R.FPQQLNADLR.K |

**No match to:** 856.5211, 898.5019, 937.4434, 1089.5870, 1108.5864, 1194.6404, 1211.6691, 1419.7561, 1618.7694, 1728.9244, 1857.0366, 1988.9957

**9. TBB2C\_MOUSE** Mass: 50255 Score: 35 Expect: 5.5 Matches: 4

Tubulin beta-2C chain OS=Mus musculus GN=Tubb2c PE=1 SV=1

| Observed  | Mr(expt)  | Mr(calc)  | ppm    | Start | End   | Miss | Ions | Peptide        |
|-----------|-----------|-----------|--------|-------|-------|------|------|----------------|
| 1028.5319 | 1027.5246 | 1027.5121 | 12.2   | 351   | - 359 | 0    | --   | K.TAVCDIPPR.G  |
| 1039.5844 | 1038.5771 | 1038.5862 | -8.75  | 310   | - 318 | 0    | --   | R.YLTVAAVFR.G  |
| 1077.5448 | 1076.5375 | 1076.5250 | 11.6   | 155   | - 162 | 1    | --   | K.IREEYPDR.I   |
| 1130.5804 | 1129.5731 | 1129.5880 | -13.18 | 242   | - 251 | 0    | --   | R.FPGQLNADLR.K |

**No match to:** 856.5211, 898.5019, 937.4434, 1089.5870, 1108.5864, 1194.6404, 1211.6691, 1419.7561, 1618.7694, 1728.9244, 1857.0366, 1988.9957

**10. CSDC2\_MOUSE Mass: 16931 Score: 33 Expect: 8.5 Matches: 2**

Cold shock domain-containing protein C2 OS=Mus musculus GN=Csdc2 PE=2 SV=1

| Observed  | Mr(expt)  | Mr(calc)  | ppm    | Start | End   | Miss | Ions | Peptide        |
|-----------|-----------|-----------|--------|-------|-------|------|------|----------------|
| 1194.6404 | 1193.6331 | 1193.6590 | -21.70 | 118   | - 127 | 1    | --   | K.ICPIPKNQK.F  |
| 1211.6691 | 1210.6618 | 1210.6571 | 3.92   | 34    | - 44  | 1    | 11   | R.IWEGGGIAPR.D |

**No match to:** 856.5211, 898.5019, 937.4434, 1028.5319, 1039.5844, 1077.5448, 1089.5870, 1108.5864, 1130.5804, 1419.7561, 1618.7694, 1728.9244, 1857.0366, 1988.9957

**Search Parameters**

Type of search : MS/MS Ion Search

Enzyme : Trypsin

Fixed modifications : Carbamidomethyl (C)

Variable modifications : Oxidation (M)

Mass values : Monoisotopic

Protein Mass : Unrestricted

Peptide Mass Tolerance :  $\pm 50$  ppm

Fragment Mass Tolerance:  $\pm 0.6$  Da

Max Missed Cleavages : 1

Instrument type : MALDI-TOF-TOF

Query1 (856.5211,1+) : <no title>

Query2 (898.5019,1+) : <no title>

Query3 (937.4434,1+) : <no title>

Query4 (1028.5319,1+) : <no title>

Query5 (1039.5844,1+) : <no title>

Query6 (1077.5448,1+) : <no title>

Query7 (1089.5870,1+) : <no title>

Query8 (1108.5864,1+) : <no title>

Query9 (1130.5804,1+) : <no title>

Query10 (1194.6404,1+) : <no title>

Query11 (1211.6691,1+) : <no title>

Query12 (1419.7561,1+) : <no title>

Query13 (1618.7694,1+) : <no title>

Query14 (1728.9244,1+) : <no title>

Query15 (1857.0366,1+) : <no title>

Query16 (1988.9957,1+) : <no title>



**Mascot:** <http://www.matrixscience.com/>

# **MASCOT** Mascot Search Results **SCIENCE**

User :  
Email :  
Search title : Auto submitted by BioTools  
Database : SwissProt 57.15 (515203 sequences; 181334896 residues)  
Taxonomy : Mus. (16281 sequences)  
Timestamp : 22 Nov 2013 at 05:07:33 GMT  
Warning : A Peptide summary report will usually give a much clearer picture of MS/MS search results.  
Top Score : 72 for GSTA2\_MOUSE, Glutathione S-transferase A2 OS=Mus musculus GN=Gsta2 PE=1 SV=2

## Mascot Score Histogram

Protein score is  $-10 \cdot \log(P)$ , where P is the probability that the observed match is a random event.

Protein scores greater than 55 are significant ( $p < 0.05$ ).

Protein scores are derived from ions scores as a non-probabilistic basis for ranking protein hits.

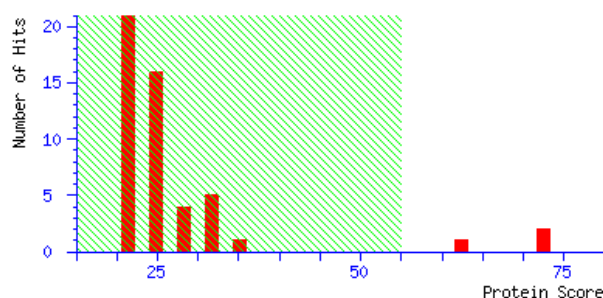

## Protein Summary Report

### Index

| Accession                      | Mass   | Score | Description                                                                                  |
|--------------------------------|--------|-------|----------------------------------------------------------------------------------------------|
| 1. <a href="#">GSTA2_MOUSE</a> | 25631  | 72    | Glutathione S-transferase A2 OS=Mus musculus GN=Gsta2 PE=1 SV=2                              |
| 2. <a href="#">GSTA1_MOUSE</a> | 25706  | 72    | Glutathione S-transferase A1 OS=Mus musculus GN=Gsta1 PE=1 SV=2                              |
| 3. <a href="#">GSTA3_MOUSE</a> | 25401  | 62    | Glutathione S-transferase A3 OS=Mus musculus GN=Gsta3 PE=1 SV=2                              |
| 4. <a href="#">TOP3A_MOUSE</a> | 114168 | 34    | DNA topoisomerase 3-alpha OS=Mus musculus GN=Top3a PE=1 SV=1                                 |
| 5. <a href="#">SAMI2_MOUSE</a> | 18462  | 33    | Sterile alpha motif domain-containing protein 12 OS=Mus musculus GN=Samd12 PE=2 SV=1         |
| 6. <a href="#">TLR12_MOUSE</a> | 101079 | 32    | Toll-like receptor 12 OS=Mus musculus GN=Tlr12 PE=2 SV=1                                     |
| 7. <a href="#">DPOLN_MOUSE</a> | 97640  | 32    | DNA polymerase nu OS=Mus musculus GN=Poln PE=2 SV=2                                          |
| 8. <a href="#">MA6D1_MOUSE</a> | 20648  | 31    | MAP6 domain-containing protein 1 OS=Mus musculus GN=Map6d1 PE=1 SV=1                         |
| 9. <a href="#">PKHA8_MOUSE</a> | 58552  | 30    | Pleckstrin homology domain-containing family A member 8 OS=Mus musculus GN=Plekha8 PE=2 SV=2 |
| 10. <a href="#">TOP1_MOUSE</a> | 91275  | 30    | DNA topoisomerase 1 OS=Mus musculus GN=Top1 PE=1 SV=2                                        |

## Results List

1. GSTA2\_MOUSE Mass: 25631 Score: 72 Expect: 0.00092 Matches: 3

Glutathione S-transferase A2 OS=Mus musculus GN=Gsta2 PE=1 SV=2

**Observed Mr(expt) Mr(calc) ppm Start End Miss Ions Peptide**

921.4534 920.4461 920.4320 15.3 14 - 20 1 --- R.GRMECIR.W

937.4602 936.4530 936.4269 27.8 14 - 20 1 --- R.GRMECIR.W + Oxidation (M)

1245.6144 1244.6071 1244.5898 13.9 142 - 152 0 54 K.SHGQDYLVGNR.L

**No match to:** 828.4596, 856.5372, 880.4954, 889.4679, 1028.6035, 1090.6051, 1227.6053, 1283.5883, 1315.7014, 1388.7675, 1426.7122, 1432.7362, 1448.7130, 1516.7498, 2247.1165

2. GSTA1\_MOUSE Mass: 25706 Score: 72 Expect: 0.00092 Matches: 3

Glutathione S-transferase A1 OS=Mus musculus GN=Gsta1 PE=1 SV=2

**Observed Mr(expt) Mr(calc) ppm Start End Miss Ions Peptide**

921.4534 920.4461 920.4320 15.3 14 - 20 1 --- R.GRMECIR.W

937.4602 936.4530 936.4269 27.8 14 - 20 1 --- R.GRMECIR.W + Oxidation (M)

1245.6144 1244.6071 1244.5898 13.9 142 - 152 0 54 K.SHGQDYLVGNR.L

**No match to:** 828.4596, 856.5372, 880.4954, 889.4679, 1028.6035, 1090.6051, 1227.6053, 1283.5883, 1315.7014, 1388.7675, 1426.7122, 1432.7362, 1448.7130, 1516.7498, 2247.1165

3. GSTA3\_MOUSE Mass: 25401 Score: 62 Expect: 0.0098 Matches: 1

Glutathione S-transferase A3 OS=Mus musculus GN=Gsta3 PE=1 SV=2

**Observed Mr(expt) Mr(calc) ppm Start End Miss Ions Peptide**

1245.6144 1244.6071 1244.5898 13.9 142 - 152 0 54 K.SHGQDYLVGNR.L

**No match to:** 828.4596, 856.5372, 880.4954, 889.4679, 921.4534, 937.4602, 1028.6035, 1090.6051, 1227.6053, 1283.5883, 1315.7014, 1388.7675, 1426.7122, 1432.7362, 1448.7130, 1516.7498, 2247.1165

4. TOP3A\_MOUSE Mass: 114168 Score: 34 Expect: 7.3 Matches: 5

DNA topoisomerase 3-alpha OS=Mus musculus GN=Top3a PE=1 SV=1

**Observed Mr(expt) Mr(calc) ppm Start End Miss Ions Peptide**

856.5372 855.5299 855.5079 25.7 752 - 758 1 --- R.FPRALPR.A

1028.6035 1027.5962 1027.6390 -41.62 820 - 828 1 --- R.EAVLLTVRK.Q

1388.7675 1387.7603 1387.7168 31.3 968 - 981 1 2 K.RPRAGSSDAGSTVK.K

1426.7122 1425.7049 1425.6962 6.08 121 - 131 1 --- K.YCPENFIDIKK.T

2247.1165 2246.1093 2246.0711 17.0 639 - 657 1 --- R.TEMAQQEEIYPAMPEPVRK.C

**No match to:** 828.4596, 880.4954, 889.4679, 921.4534, 937.4602, 1090.6051, 1227.6053, 1245.6144, 1283.5883, 1315.7014, 1432.7362, 1448.7130, 1516.7498

5. SAM12\_MOUSE Mass: 18462 Score: 33 Expect: 8.5 Matches: 3

Sterile alpha motif domain-containing protein 12 OS=Mus musculus GN=Samd12 PE=2 SV=1

**Observed Mr(expt) Mr(calc) ppm Start End Miss Ions Peptide**

1090.6051 1089.5978 1089.5819 14.6 42 - 50 1 --- R.TFQKVPDQK.G

1432.7362 1431.7289 1431.7569 -19.56 56 - 69 1 --- R.LQGEAETAKSATVK.L

1516.7498 1515.7425 1515.7780 -23.43 26 - 39 0 --- K.LQIEGEGVESQSIK.N

**No match to:** 828.4596, 856.5372, 880.4954, 889.4679, 921.4534, 937.4602, 1028.6035, 1227.6053, 1245.6144, 1283.5883, 1315.7014,

1388.7675, 1426.7122, 1448.7130, 2247.1165

6. TLR12\_MOUSE Mass: 101079 Score: 32 Expect: 11 Matches: 5

Toll-like receptor 12 OS=Mus musculus GN=TLR12 PE=2 SV=1

**Observed Mr(expt) Mr(calc) ppm Start End Miss Ions Peptide**

828.4596 827.4523 827.4541 -2.22 672 - 677 0 --- K.TYIYIR.D  
1090.6051 1089.5978 1089.5488 44.9 628 - 636 0 --- K.DLMLQDSL.R.E  
1245.6144 1244.6071 1244.5761 24.9 39 - 47 1 --- R.YFTFCRHSK.L  
1426.7122 1425.7049 1425.6864 13.0 759 - 769 0 --- R.FLFDVVFVSHCR.Q  
1516.7498 1515.7425 1515.8045 -40.91 501 - 515 0 --- K.LGSQNASGVFPALQK.L

**No match to:** 856.5372, 880.4954, 889.4679, 921.4534, 937.4602, 1028.6035, 1227.6053, 1283.5883, 1315.7014, 1388.7675, 1432.7362, 1448.7130, 2247.1165

7. DPOLN\_MOUSE Mass: 97640 Score: 32 Expect: 12 Matches: 6

DNA polymerase nu OS=Mus musculus GN=Poln PE=2 SV=2

**Observed Mr(expt) Mr(calc) ppm Start End Miss Ions Peptide**

828.4596 827.4523 827.4766 -29.38 136 - 141 1 --- K.RQHFLK.E  
889.4679 888.4606 888.4739 -14.94 209 - 216 0 --- K.AQLMDALK.Q  
921.4534 920.4461 920.4637 -19.17 238 - 245 0 --- K.EALTCTVK.G  
1245.6144 1244.6071 1244.6071 0.04 442 - 451 1 --- K.IPVDKEEMER.T  
1388.7675 1387.7603 1387.7671 -4.93 782 - 795 0 --- R.ISTAVAT'SPTLTAR.L  
1426.7122 1425.7049 1425.6776 19.1 650 - 661 0 --- R.DDVFSTLTSQWK.D

**No match to:** 856.5372, 880.4954, 937.4602, 1028.6035, 1090.6051, 1227.6053, 1283.5883, 1315.7014, 1432.7362, 1448.7130, 1516.7498, 2247.1165

8. MA6D1\_MOUSE Mass: 20648 Score: 31 Expect: 14 Matches: 3

MAP6 domain-containing protein 1 OS=Mus musculus GN=Map6d1 PE=1 SV=1

**Observed Mr(expt) Mr(calc) ppm Start End Miss Ions Peptide**

828.4596 827.4523 827.4250 33.0 50 - 58 0 --- R.GNPSVAGAR.E  
889.4679 888.4606 888.4276 37.1 2 - 8 0 --- M.AWPCISR.L  
921.4534 920.4461 920.4828 -39.92 72 - 79 1 --- R.DFGVRTAR.A

**No match to:** 856.5372, 880.4954, 937.4602, 1028.6035, 1090.6051, 1227.6053, 1245.6144, 1283.5883, 1315.7014, 1388.7675, 1426.7122, 1432.7362, 1448.7130, 1516.7498, 2247.1165

9. PKHA8\_MOUSE Mass: 58552 Score: 30 Expect: 15 Matches: 4

Pleckstrin homology domain-containing family A member 8 OS=Mus musculus GN=Plekha8 PE=2 SV=2

**Observed Mr(expt) Mr(calc) ppm Start End Miss Ions Peptide**

880.4954 879.4881 879.4484 45.2 115 - 121 1 --- K.TKMSELRL + Oxidation (M)  
889.4679 888.4606 888.4739 -14.95 359 - 366 0 --- K.MDLVGNK.K  
1028.6035 1027.5962 1027.6066 -10.16 349 - 358 0 --- K.LGPTVFAPVK.M  
1388.7675 1387.7603 1387.7585 1.23 440 - 450 1 --- K.TLRQHGWVVR.G

**No match to:** 828.4596, 856.5372, 921.4534, 937.4602, 1090.6051, 1227.6053, 1245.6144, 1283.5883, 1315.7014, 1426.7122, 1432.7362, 1448.7130, 1516.7498, 2247.1165

10. TOP1\_MOUSE Mass: 91275 Score: 30 Expect: 17 Matches: 6

DNA topoisomerase 1 OS=Mus musculus GN=Top1 PE=1 SV=2

**Observed Mr(expt) Mr(calc) ppm Start End Miss Ions Peptide**

|           |           |           |        |           |   |     |                                        |
|-----------|-----------|-----------|--------|-----------|---|-----|----------------------------------------|
| 828.4596  | 827.4523  | 827.4541  | -2.24  | 738 - 744 | 0 | --- | K.WGVPIEK.I                            |
| 889.4679  | 888.4606  | 888.4552  | 6.05   | 329 - 335 | 1 | --- | K.IKEENEK.L                            |
| 1283.5883 | 1282.5810 | 1282.6405 | -46.33 | 606 - 617 | 0 | --- | K.ELTAPDENVPAK.I                       |
| 1432.7362 | 1431.7289 | 1431.7101 | 13.1   | 379 - 390 | 0 | --- | R.IMPEDIINCISK.D                       |
| 1448.7130 | 1447.7057 | 1447.7051 | 0.47   | 379 - 390 | 0 | --- | R.IMPEDIINCISK.D + Oxidation (M)       |
| 2247.1165 | 2246.1093 | 2246.0565 | 23.5   | 255 - 273 | 1 | --- | K.AEEVATFFAKMLDHEYTTKE + Oxidation (M) |

**No match to:** 856.5372, 880.4954, 921.4534, 937.4602, 1028.6035, 1090.6051, 1227.6053, 1245.6144, 1315.7014, 1388.7675, 1426.7122, 1516.7498

**Search Parameters**

**Type of search** : MS/MS Ion Search

**Enzyme** : Trypsin

**Fixed modifications** : Carbamidomethyl (C)

**Variable modifications** : Oxidation (M)

**Mass values** : Monoisotopic

**Protein Mass** : Unrestricted

**Peptide Mass Tolerance** :  $\pm 50$  ppm

**Fragment Mass Tolerance**:  $\pm 0.6$  Da

**Max Missed Cleavages** : 1

**Instrument type** : MALDI-TOF-TOF

**Query1 (828.4596,1+)** : <no title>

**Query2 (856.5372,1+)** : <no title>

**Query3 (880.4954,1+)** : <no title>

**Query4 (889.4679,1+)** : <no title>

**Query5 (921.4534,1+)** : <no title>

**Query6 (937.4602,1+)** : <no title>

**Query7 (1028.6035,1+)** : <no title>

**Query8 (1090.6051,1+)** : <no title>

**Query9 (1227.6053,1+)** : <no title>

**Query10 (1245.6144,1+)** : <no title>

**Query11 (1283.5883,1+)** : <no title>

**Query12 (1315.7014,1+)** : <no title>

**Query13 (1388.7675,1+)** : <no title>

**Query14 (1426.7122,1+)** : <no title>

**Query15 (1432.7362,1+)** : <no title>

**Query16 (1448.7130,1+)** : <no title>

**Query17 (1516.7498,1+)** : <no title>

**Query18 (2247.1165,1+)** : <no title>

**Mascot:** <http://www.matrixscience.com/>

# **MASCOT** Mascot Search Results **SCIENCE**

User :  
Email :  
Search title : Auto submitted by BioTools  
Database : SwissProt 57.15 (515203 sequences; 181334896 residues)  
Taxonomy : Mus musculus (house mouse) (16230 sequences)  
Timestamp : 5 Nov 2013 at 04:47:54 GMT  
Warning : A Peptide summary report will usually give a much clearer picture of MS/MS search results.  
Top Score : 349 for HSP7C\_MOUSE, Heat shock cognate 71 kDa protein OS=Mus musculus GN=Hspa8 PE=1 SV=1

## Mascot Score Histogram

Protein score is  $-10 \cdot \log(P)$ , where P is the probability that the observed match is a random event.

Protein scores greater than 55 are significant ( $p < 0.05$ ).

Protein scores are derived from ions scores as a non-probabilistic basis for ranking protein hits.

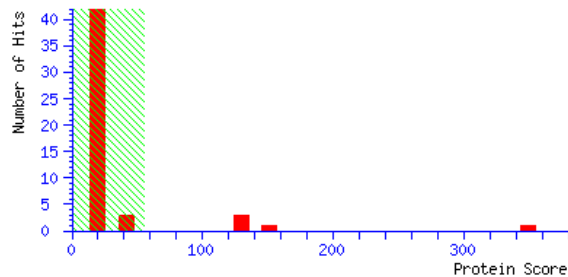

## Protein Summary Report

### Index

| Accession                      | Mass  | Score | Description                                                            |
|--------------------------------|-------|-------|------------------------------------------------------------------------|
| 1. <a href="#">HSP7C_MOUSE</a> | 71055 | 349   | Heat shock cognate 71 kDa protein OS=Mus musculus GN=Hspa8 PE=1 SV=1   |
| 2. <a href="#">HSP72_MOUSE</a> | 69983 | 143   | Heat shock-related 70 kDa protein 2 OS=Mus musculus GN=Hspa2 PE=1 SV=1 |
| 3. <a href="#">HS71A_MOUSE</a> | 70321 | 134   | Heat shock 70 kDa protein 1A OS=Mus musculus GN=Hspa1a PE=1 SV=2       |
| 4. <a href="#">HS71L_MOUSE</a> | 70992 | 134   | Heat shock 70 kDa protein 1-like OS=Mus musculus GN=Hspa1l PE=2 SV=4   |
| 5. <a href="#">HS71B_MOUSE</a> | 70418 | 134   | Heat shock 70 kDa protein 1B OS=Mus musculus GN=Hspa1b PE=1 SV=3       |
| 6. <a href="#">GRP78_MOUSE</a> | 72492 | 40    | 78 kDa glucose-regulated protein OS=Mus musculus GN=Hspa5 PE=1 SV=3    |
| 7. <a href="#">DNJB1_MOUSE</a> | 38314 | 40    | DnaJ homolog subfamily B member 1 OS=Mus musculus GN=Dnajb1 PE=2 SV=3  |
| 8. <a href="#">KCP4_MOUSE</a>  | 28965 | 31    | Kv channel-interacting protein 4 OS=Mus musculus GN=Kcnp4 PE=1 SV=1    |
| 9. <a href="#">FBX31_MOUSE</a> | 57896 | 31    | F-box only protein 31 OS=Mus musculus GN=Fbxo31 PE=1 SV=1              |
| 10. <a href="#">NEC1_MOUSE</a> | 84749 | 30    | Neuroendocrine convertase 1 OS=Mus musculus GN=Pcsk1 PE=1 SV=1         |

## Results List

1. [HSP7C\\_MOUSE](#) Mass: 71055 Score: 349 Expect: 2e-031 Matches: 7

Heat shock cognate 71 kDa protein OS=Mus musculus GN=Hspa8 PE=1 SV=1

| Observed  | Mr(expt)  | Mr(calc)  | ppm    | Start | End | Miss | Ions | Peptide                          |
|-----------|-----------|-----------|--------|-------|-----|------|------|----------------------------------|
| 1199.6404 | 1198.6331 | 1198.6670 | -28.25 | 160   | -   | 171  | 0 92 | K.DAGTIAGLNVLRI                  |
| 1228.6001 | 1227.5928 | 1227.6207 | -22.77 | 26    | -   | 36   | 0 35 | K.VEIIANDQGNR.T                  |
| 1410.6198 | 1409.6125 | 1409.6609 | -34.31 | 77    | -   | 88   | 1 -- | R.RFDDAVVQSDMK.H                 |
| 1426.5993 | 1425.5921 | 1425.6558 | -44.74 | 77    | -   | 88   | 1 -- | R.RFDDAVVQSDMK.H + Oxidation (M) |
| 1487.6625 | 1486.6553 | 1486.6940 | -26.06 | 37    | -   | 49   | 0 87 | R.TTPSYVAFTDTER.L                |
| 1805.8539 | 1804.8466 | 1804.8890 | -23.51 | 57    | -   | 72   | 1 -- | K.NQVAMNPTNTVFDAKR.L             |
| 1981.9716 | 1980.9643 | 1980.9905 | -13.24 | 138   | -   | 155  | 0 75 | K.TVTNAVVTVPAYFNDSQR.Q           |

**No match to:** 1034.5246, 1154.6069, 1371.8288, 1443.6848, 1449.9106, 1501.6660, 1646.9416, 1701.7922

2. HSP72\_MOUSE Mass: 69983 Score: 143 Expect: 8.1e-011 Matches: 3

Heat shock-related 70 kDa protein 2 OS=Mus musculus GN=Hspa2 PE=1 SV=1

| Observed  | Mr(expt)  | Mr(calc)  | ppm    | Start | End | Miss | Ions | Peptide             |
|-----------|-----------|-----------|--------|-------|-----|------|------|---------------------|
| 1228.6001 | 1227.5928 | 1227.6207 | -22.77 | 27    | -   | 37   | 0 35 | K.VEIIANDQGNR.T     |
| 1487.6625 | 1486.6553 | 1486.6940 | -26.06 | 38    | -   | 50   | 0 87 | R.TTPSYVAFTDTER.L   |
| 1646.9416 | 1645.9343 | 1645.9039 | 18.5   | 95    | -   | 109  | 1 -- | R.VVSEGGKPKVQVEYK.G |

**No match to:** 1034.5246, 1154.6069, 1199.6404, 1371.8288, 1410.6198, 1426.5993, 1443.6848, 1449.9106, 1501.6660, 1701.7922, 1805.8539, 1981.9716

3. HS71A\_MOUSE Mass: 70321 Score: 134 Expect: 6.5e-010 Matches: 2

Heat shock 70 kDa protein 1A OS=Mus musculus GN=Hspa1a PE=1 SV=2

| Observed  | Mr(expt)  | Mr(calc)  | ppm    | Start | End | Miss | Ions | Peptide           |
|-----------|-----------|-----------|--------|-------|-----|------|------|-------------------|
| 1228.6001 | 1227.5928 | 1227.6207 | -22.77 | 26    | -   | 36   | 0 35 | K.VEIIANDQGNR.T   |
| 1487.6625 | 1486.6553 | 1486.6940 | -26.06 | 37    | -   | 49   | 0 87 | R.TTPSYVAFTDTER.L |

**No match to:** 1034.5246, 1154.6069, 1199.6404, 1371.8288, 1410.6198, 1426.5993, 1443.6848, 1449.9106, 1501.6660, 1646.9416, 1701.7922, 1805.8539, 1981.9716

4. HS71L\_MOUSE Mass: 70992 Score: 134 Expect: 6.5e-010 Matches: 2

Heat shock 70 kDa protein 1-like OS=Mus musculus GN=Hspa1l PE=2 SV=4

| Observed  | Mr(expt)  | Mr(calc)  | ppm    | Start | End | Miss | Ions | Peptide           |
|-----------|-----------|-----------|--------|-------|-----|------|------|-------------------|
| 1228.6001 | 1227.5928 | 1227.6207 | -22.77 | 28    | -   | 38   | 0 35 | K.VEIIANDQGNR.T   |
| 1487.6625 | 1486.6553 | 1486.6940 | -26.06 | 39    | -   | 51   | 0 87 | R.TTPSYVAFTDTER.L |

**No match to:** 1034.5246, 1154.6069, 1199.6404, 1371.8288, 1410.6198, 1426.5993, 1443.6848, 1449.9106, 1501.6660, 1646.9416, 1701.7922, 1805.8539, 1981.9716

5. HS71B\_MOUSE Mass: 70418 Score: 134 Expect: 6.5e-010 Matches: 2

Heat shock 70 kDa protein 1B OS=Mus musculus GN=Hspa1b PE=1 SV=3

| Observed  | Mr(expt)  | Mr(calc)  | ppm    | Start | End | Miss | Ions | Peptide           |
|-----------|-----------|-----------|--------|-------|-----|------|------|-------------------|
| 1228.6001 | 1227.5928 | 1227.6207 | -22.77 | 26    | -   | 36   | 0 35 | K.VEIIANDQGNR.T   |
| 1487.6625 | 1486.6553 | 1486.6940 | -26.06 | 37    | -   | 49   | 0 87 | R.TTPSYVAFTDTER.L |

**No match to:** 1034.5246, 1154.6069, 1199.6404, 1371.8288, 1410.6198, 1426.5993, 1443.6848, 1449.9106, 1501.6660, 1646.9416, 1701.7922, 1805.8539, 1981.9716

6. GRP78\_MOUSE Mass: 72492 Score: 40 Expect: 1.5 Matches: 1

78 kDa glucose-regulated protein OS=Mus musculus GN=Hspa5 PE=1 SV=3

**Observed Mr(expt) Mr(calc) ppm Start End Miss Ions Peptide**

1228.6001 1227.5928 1227.6207 -22.77 51 - 61 0 35 R.VEIIANDQGNR.I

**No match to:** 1034.5246, 1154.6069, 1199.6404, 1371.8288, 1410.6198, 1426.5993, 1443.6848, 1449.9106, 1487.6625, 1501.6660, 1646.9416, 1701.7922, 1805.8539, 1981.9716

7. DNJB1\_MOUSE Mass: 38314 Score: 40 Expect: 1.7 Matches: 4

DnaJ homolog subfamily B member 1 OS=Mus musculus GN=Dnajb1 PE=2 SV=3

**Observed Mr(expt) Mr(calc) ppm Start End Miss Ions Peptide**

1034.5246 1033.5173 1033.5080 9.04 38 - 46 1 --- K.EPGAEKFK.E

1154.6069 1153.5996 1153.6356 -31.21 241 - 249 1 --- K.DKPHNIFKR.D

1199.6404 1198.6331 1198.5982 29.1 4 - 13 0 7 K.DYYQTLGLAR.G

1228.6001 1227.5928 1227.5673 20.8 110 - 119 0 --- R.NPFDTFGQR.N

**No match to:** 1371.8288, 1410.6198, 1426.5993, 1443.6848, 1449.9106, 1487.6625, 1501.6660, 1646.9416, 1701.7922, 1805.8539, 1981.9716

8. KCIP4\_MOUSE Mass: 28965 Score: 31 Expect: 13 Matches: 3

Kv channel-interacting protein 4 OS=Mus musculus GN=Kcnp4 PE=1 SV=1

**Observed Mr(expt) Mr(calc) ppm Start End Miss Ions Peptide**

1701.7922 1700.7849 1700.8001 -8.92 173 - 186 1 --- K.DGYITKEEMLDIMK.A + Oxidation (M)

1805.8539 1804.8466 1804.8562 -5.32 187 - 201 1 --- K.AIYDMMGKCTYPVLK.E + Oxidation (M)

1981.9716 1980.9643 1980.9463 9.10 219 - 235 1 --- K.NKDGVTIDEFIESCQK.D

**No match to:** 1034.5246, 1154.6069, 1199.6404, 1228.6001, 1371.8288, 1410.6198, 1426.5993, 1443.6848, 1449.9106, 1487.6625, 1501.6660, 1646.9416

9. FBX31\_MOUSE Mass: 57896 Score: 31 Expect: 14 Matches: 5

F-box only protein 31 OS=Mus musculus GN=Fbxo31 PE=1 SV=1

**Observed Mr(expt) Mr(calc) ppm Start End Miss Ions Peptide**

1034.5246 1033.5173 1033.5226 -5.12 110 - 118 0 --- K.LEITGVSCR.D

1154.6069 1153.5996 1153.6244 -21.49 86 - 94 0 --- R.ILHTDTIWR.R

1199.6404 1198.6331 1198.6571 -20.00 198 - 208 0 --- K.GPHNGHIQVK.R

1410.6198 1409.6125 1409.6431 -21.70 186 - 197 1 --- R.KSATVECMYGHK.G

1426.5993 1425.5921 1425.6381 -32.27 186 - 197 1 --- R.KSATVECMYGHK.G + Oxidation (M)

**No match to:** 1228.6001, 1371.8288, 1443.6848, 1449.9106, 1487.6625, 1501.6660, 1646.9416, 1701.7922, 1805.8539, 1981.9716

10. NEC1\_MOUSE Mass: 84749 Score: 30 Expect: 15 Matches: 4

Neuroendocrine convertase 1 OS=Mus musculus GN=Pcsk1 PE=1 SV=1

**Observed Mr(expt) Mr(calc) ppm Start End Miss Ions Peptide**

1034.5246 1033.5173 1033.4975 19.2 429 - 438 0 --- K.NGAGLMVNSR.F + Oxidation (M)

1154.6069 1153.5996 1153.5880 10.1 287 - 296 1 --- K.AFEYGVKQGR.Q

1443.6848 1442.6776 1442.6394 26.4 212 - 224 0 --- R.CAGEIAMQANNHK.C

1981.9716 1980.9643 1981.0204 -28.30 429 - 447 1 --- K.NGAGLMVNSRFGFLLNAK.A + Oxidation (M)



No match to: 1199.6404, 1228.6001, 1371.8288, 1410.6198, 1426.5993, 1449.9106, 1487.6625, 1501.6660, 1646.9416, 1701.7922, 1805.8539

#### Search Parameters

Type of search : MS/MS Ion Search  
Enzyme : Trypsin  
Fixed modifications : Carbamidomethyl (C)  
Variable modifications : Oxidation (M)  
Mass values : Monoisotopic  
Protein Mass : Unrestricted  
Peptide Mass Tolerance :  $\pm 50$  ppm  
Fragment Mass Tolerance:  $\pm 0.6$  Da  
Max Missed Cleavages : 1  
Instrument type : MALDI-TOF-TOF  
Query1 (1034.5246,1+) : <no title>  
Query2 (1154.6069,1+) : <no title>  
Query3 (1199.6404,1+) : <no title>  
Query4 (1228.6001,1+) : <no title>  
Query5 (1371.8288,1+) : <no title>  
Query6 (1410.6198,1+) : <no title>  
Query7 (1426.5993,1+) : <no title>  
Query8 (1443.6848,1+) : <no title>  
Query9 (1449.9106,1+) : <no title>  
Query10 (1487.6625,1+) : <no title>  
Query11 (1501.6660,1+) : <no title>  
Query12 (1646.9416,1+) : <no title>  
Query13 (1701.7922,1+) : <no title>  
Query14 (1805.8539,1+) : <no title>  
Query15 (1981.9716,1+) : <no title>

Mascot: <http://www.matrixscience.com/>

# **MASCOT** Mascot Search Results **SCIENCE**

User :  
Email :  
Search title : Auto submitted by BioTools  
Database : SwissProt 57.15 (515203 sequences; 181334896 residues)  
Taxonomy : Mus musculus (house mouse) (16230 sequences)  
Timestamp : 5 Nov 2013 at 04:47:44 GMT  
Warning : A Peptide summary report will usually give a much clearer picture of MS/MS search results.  
Top Score : 84 for TAGL\_MOUSE, Transgelin OS=Mus musculus GN=Tagln PE=1 SV=3

## Mascot Score Histogram

Protein score is  $-10 \cdot \log(P)$ , where P is the probability that the observed match is a random event.

Protein scores greater than 55 are significant ( $p < 0.05$ ).

Protein scores are derived from ions scores as a non-probabilistic basis for ranking protein hits.

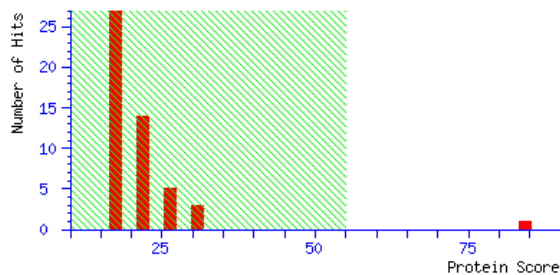

## Protein Summary Report

### Index

| Accession                      | Mass   | Score | Description                                                                           |
|--------------------------------|--------|-------|---------------------------------------------------------------------------------------|
| 1. <a href="#">TAGL_MOUSE</a>  | 22618  | 84    | Transgelin OS=Mus musculus GN=Tagln PE=1 SV=3                                         |
| 2. <a href="#">KCTD6_MOUSE</a> | 27835  | 32    | BTB/POZ domain-containing protein KCTD6 OS=Mus musculus GN=Kctd6 PE=2 SV=1            |
| 3. <a href="#">ACES_MOUSE</a>  | 68525  | 31    | Acetylcholinesterase OS=Mus musculus GN=Ache PE=1 SV=1                                |
| 4. <a href="#">FKBP5_MOUSE</a> | 51504  | 30    | Peptidyl-prolyl cis-trans isomerase FKBP5 OS=Mus musculus GN=Fkbp5 PE=1 SV=1          |
| 5. <a href="#">CCD27_MOUSE</a> | 74004  | 26    | Coiled-coil domain-containing protein 27 OS=Mus musculus GN=Ccdc27 PE=2 SV=1          |
| 6. <a href="#">SLUR1_MOUSE</a> | 12578  | 26    | Secreted Ly-6/uPAR-related protein 1 OS=Mus musculus GN=Slurp1 PE=2 SV=1              |
| 7. <a href="#">ID3_MOUSE</a>   | 13366  | 25    | DNA-binding protein inhibitor ID-3 OS=Mus musculus GN=Id3 PE=1 SV=1                   |
| 8. <a href="#">SHAN2_MOUSE</a> | 159394 | 25    | SH3 and multiple ankyrin repeat domains protein 2 OS=Mus musculus GN=Shank2 PE=1 SV=1 |
| 9. <a href="#">ACAD8_MOUSE</a> | 45789  | 25    | Isobutyryl-CoA dehydrogenase, mitochondrial OS=Mus musculus GN=Acad8 PE=2 SV=2        |
| 10. <a href="#">GPC5_MOUSE</a> | 64891  | 23    | Glypican-5 OS=Mus musculus GN=Gpc5 PE=2 SV=1                                          |

## Results List

1. [TAGL\\_MOUSE](#) Mass: 22618 Score: 84 Expect: 6.2e-005 Matches: 3

Transgelin OS=Mus musculus GN=Tagln PE=1 SV=3

**Observed Mr(expt) Mr(calc) ppm Start End Miss Ions Peptide**

806.3523 805.3450 805.3752 -37.48 122 - 128 0 --- K.DMAAVQR.T + Oxidation (M)  
854.3754 853.3681 853.3752 -8.30 5 - 12 0 --- K.GPSYGMSR.E  
1210.5286 1209.5213 1209.5513 -24.80 21 - 29 1 56 K.KYDEELEER.L

**No match to:** 856.5218, 896.4893, 1044.5397, 1224.5362, 1243.5824, 1266.5792, 1289.5312, 1552.7751, 1568.6779, 2112.3339, 2126.9883

**2. KCTD6\_MOUSE Mass: 27835 Score: 32 Expect: 9.3 Matches: 3**

BTB/POZ domain-containing protein KCTD6 OS=Mus musculus GN=Kctd6 PE=2 SV=1

**Observed Mr(expt) Mr(calc) ppm Start End Miss Ions Peptide**

806.3523 805.3450 805.3211 29.7 166 - 171 0 --- K.HMMDTR.D + Oxidation (M)  
1224.5362 1223.5289 1223.5571 -23.04 51 - 60 0 --- R.DPQGNFYFIDR.D  
1266.5792 1265.5719 1265.6047 -25.91 207 - 216 1 --- R.NTRVHHMSER.A

**No match to:** 854.3754, 856.5218, 896.4893, 1044.5397, 1210.5286, 1243.5824, 1289.5312, 1552.7751, 1568.6779, 2112.3339, 2126.9883

**3. ACES\_MOUSE Mass: 68525 Score: 31 Expect: 13 Matches: 2**

Acetylcholinesterase OS=Mus musculus GN=Ache PE=1 SV=1

**Observed Mr(expt) Mr(calc) ppm Start End Miss Ions Peptide**

856.5218 855.5146 855.5039 12.5 45 - 52 1 --- R.GGQLRGIR.L  
2126.9883 2125.9810 2126.0249 -20.65 285 - 305 0 17 R.LVGCPPGGAGGNDTELIACLR.T

**No match to:** 806.3523, 854.3754, 896.4893, 1044.5397, 1210.5286, 1224.5362, 1243.5824, 1266.5792, 1289.5312, 1552.7751, 1568.6779, 2112.3339

**4. FKBP5\_MOUSE Mass: 51504 Score: 30 Expect: 15 Matches: 5**

Peptidyl-prolyl cis-trans isomerase FKBP5 OS=Mus musculus GN=Fkbp5 PE=1 SV=1

**Observed Mr(expt) Mr(calc) ppm Start End Miss Ions Peptide**

1044.5397 1043.5325 1043.5222 9.82 407 - 414 1 --- R.RVYANMFK.K + Oxidation (M)  
1224.5362 1223.5289 1223.5492 -16.59 253 - 262 1 --- K.AKESWEMDTK.E  
1289.5312 1288.5239 1288.5354 -8.89 441 - 451 0 --- K.QHESQAMEEGK.A + Oxidation (M)  
1552.7751 1551.7678 1551.7239 28.3 358 - 371 0 --- R.GEAQLLMNDFESAK.G  
1568.6779 1567.6706 1567.7188 -30.71 358 - 371 0 --- R.GEAQLLMNDFESAK.G + Oxidation (M)

**No match to:** 806.3523, 854.3754, 856.5218, 896.4893, 1210.5286, 1243.5824, 1266.5792, 2112.3339, 2126.9883

**5. CCD27\_MOUSE Mass: 74004 Score: 26 Expect: 39 Matches: 2**

Coiled-coil domain-containing protein 27 OS=Mus musculus GN=Ccdc27 PE=2 SV=1

**Observed Mr(expt) Mr(calc) ppm Start End Miss Ions Peptide**

1243.5824 1242.5751 1242.5728 1.88 308 - 320 0 --- K.SSEGPPEEAAAAK.L  
2126.9883 2125.9810 2126.0603 -37.32 308 - 328 1 11 K.SSEGPPEEAAAAKLSRPSQSK.T

**No match to:** 806.3523, 854.3754, 856.5218, 896.4893, 1044.5397, 1210.5286, 1224.5362, 1266.5792, 1289.5312, 1552.7751, 1568.6779, 2112.3339

**6. SLUR1\_MOUSE Mass: 12578 Score: 26 Expect: 43 Matches: 2**

Secreted Ly-6/uPAR-related protein 1 OS=Mus musculus GN=Slurp1 PE=2 SV=1

**Observed Mr(expt) Mr(calc) ppm Start End Miss Ions Peptide**

854.3754 853.3681 853.3310 43.6 45 - 51 0 --- K.MEDTACK.T

1568.6779 1567.6706 1567.6793 -5.50 39 - 51 1 --- K.NIAQCKMEDTACK.T

**No match to:** 806.3523, 856.5218, 896.4893, 1044.5397, 1210.5286, 1224.5362, 1243.5824, 1266.5792, 1289.5312, 1552.7751, 2112.3339, 2126.9883

**7. ID3\_MOUSE Mass: 13366 Score: 25 Expect: 47 Matches: 1**

DNA-binding protein inhibitor ID-3 OS=Mus musculus GN=Id3 PE=1 SV=1

**Observed Mr(expt) Mr(calc) ppm Start End Miss Ions Peptide**

2126.9883 2125.9810 2125.9707 4.83 3 - 20 1 13 K.ALSPVRGCYEAVCCLSER.S

**No match to:** 806.3523, 854.3754, 856.5218, 896.4893, 1044.5397, 1210.5286, 1224.5362, 1243.5824, 1266.5792, 1289.5312, 1552.7751, 1568.6779, 2112.3339

**8. SHAN2\_MOUSE Mass: 159394 Score: 25 Expect: 49 Matches: 5**

SH3 and multiple ankyrin repeat domains protein 2 OS=Mus musculus GN=Shank2 PE=1 SV=1

**Observed Mr(expt) Mr(calc) ppm Start End Miss Ions Peptide**

806.3523 805.3450 805.3566 -14.35 210 - 216 0 --- R.DSQAETR.A

856.5218 855.5146 855.4967 20.9 459 - 466 0 --- K.GPFLGLPR.G

1044.5397 1043.5325 1043.5838 -49.15 490 - 498 0 --- R.QFLAPPMLK.F

1266.5792 1265.5719 1265.5922 -15.99 1286 - 1297 0 --- R.SPEVMSTVSGTR.S + Oxidation (M)

1552.7751 1551.7678 1551.8256 -37.25 395 - 408 0 --- K.DKPEEIVPASKPSR.T

**No match to:** 854.3754, 896.4893, 1210.5286, 1224.5362, 1243.5824, 1289.5312, 1568.6779, 2112.3339, 2126.9883

**9. ACAD8\_MOUSE Mass: 45789 Score: 25 Expect: 55 Matches: 3**

Isobutyryl-CoA dehydrogenase, mitochondrial OS=Mus musculus GN=Acad8 PE=2 SV=2

**Observed Mr(expt) Mr(calc) ppm Start End Miss Ions Peptide**

896.4893 895.4820 895.4552 30.0 49 - 56 0 --- K.VAFDFAAR.E

1044.5397 1043.5325 1043.5148 16.9 234 - 242 0 --- K.VGWNSQPTR.A

1210.5286 1209.5213 1209.5369 -12.93 343 - 353 0 --- R.EDAVALCSMAK.L + Oxidation (M)

**No match to:** 806.3523, 854.3754, 856.5218, 1224.5362, 1243.5824, 1266.5792, 1289.5312, 1552.7751, 1568.6779, 2112.3339, 2126.9883

**10. GPC5\_MOUSE Mass: 64891 Score: 23 Expect: 76 Matches: 3**

Glypican-5 OS=Mus musculus GN=Gpc5 PE=2 SV=1

**Observed Mr(expt) Mr(calc) ppm Start End Miss Ions Peptide**

854.3754 853.3681 853.3640 4.85 358 - 364 0 --- R.CTFDPSK.E

1266.5792 1265.5719 1265.6186 -36.88 73 - 82 1 --- K.MEERYQIAAR.Q

2126.9883 2125.9810 2126.0176 -17.24 515 - 532 1 --- R.TLKITNWPDSMNFSQV.K

**No match to:** 806.3523, 856.5218, 896.4893, 1044.5397, 1210.5286, 1224.5362, 1243.5824, 1289.5312, 1552.7751, 1568.6779, 2112.3339

**Search Parameters**

**Type of search : MS/MS Ion Search**

**Enzyme : Trypsin**

**Fixed modifications** : Carbamidomethyl (C)

**Variable modifications** : Oxidation (M)

**Mass values** : Monoisotopic

**Protein Mass** : Unrestricted

**Peptide Mass Tolerance** :  $\pm 50$  ppm

**Fragment Mass Tolerance**:  $\pm 0.6$  Da

**Max Missed Cleavages** : 1

**Instrument type** : MALDI-TOF-TOF

**Query1 (806.3523,1+)** : <no title>

**Query2 (854.3754,1+)** : <no title>

**Query3 (856.5218,1+)** : <no title>

**Query4 (896.4893,1+)** : <no title>

**Query5 (1044.5397,1+)** : <no title>

**Query6 (1210.5286,1+)** : <no title>

**Query7 (1224.5362,1+)** : <no title>

**Query8 (1243.5824,1+)** : <no title>

**Query9 (1266.5792,1+)** : <no title>

**Query10 (1289.5312,1+)** : <no title>

**Query11 (1552.7751,1+)** : <no title>

**Query12 (1568.6779,1+)** : <no title>

**Query13 (2112.3339,1+)** : <no title>

**Query14 (2126.9883,1+)** : <no title>

**Mascot:** <http://www.matrixscience.com/>

# **MASCOT** Mascot Search Results **SCIENCE**

User :  
 Email :  
 Search title : Auto submitted by BioTools  
 Database : SwissProt 57.15 (515203 sequences; 181334896 residues)  
 Taxonomy : Mus musculus (house mouse) (16230 sequences)  
 Timestamp : 5 Nov 2013 at 04:47:35 GMT  
 Warning : A Peptide summary report will usually give a much clearer picture of MS/MS search results.  
 Top Score : 101 for MSS4\_MOUSE, Guanine nucleotide exchange factor MSS4 OS=Mus musculus GN=Rabif PE=2 SV=1

## Mascot Score Histogram

Protein score is  $-10 \cdot \log(P)$ , where P is the probability that the observed match is a random event.

Protein scores greater than 55 are significant ( $p < 0.05$ ).

Protein scores are derived from ions scores as a non-probabilistic basis for ranking protein hits.

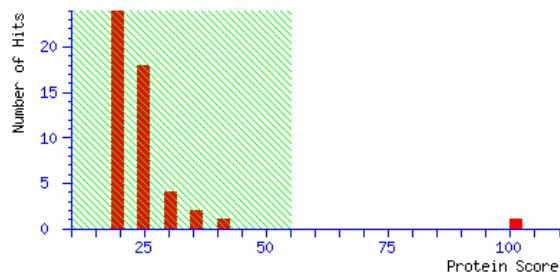

## Protein Summary Report

### Index

| Accession                       | Mass   | Score | Description                                                                        |
|---------------------------------|--------|-------|------------------------------------------------------------------------------------|
| 1. <a href="#">MSS4_MOUSE</a>   | 14248  | 101   | Guanine nucleotide exchange factor MSS4 OS=Mus musculus GN=Rabif PE=2 SV=1         |
| 2. <a href="#">LSP1_MOUSE</a>   | 36806  | 42    | Lymphocyte-specific protein 1 OS=Mus musculus GN=Lsp1 PE=1 SV=2                    |
| 3. <a href="#">MICA2_MOUSE</a>  | 111200 | 34    | Protein MICAL-2 OS=Mus musculus GN=Mical2 PE=1 SV=1                                |
| 4. <a href="#">SMOC1_MOUSE</a>  | 52298  | 33    | SPARC-related modular calcium-binding protein 1 OS=Mus musculus GN=Smoc1 PE=2 SV=2 |
| 5. <a href="#">NSUN5_MOUSE</a>  | 51568  | 32    | Putative methyltransferase NSUN5 OS=Mus musculus GN=Nsun5 PE=2 SV=2                |
| 6. <a href="#">THEM5_MOUSE</a>  | 28132  | 30    | Thioesterase superfamily member 5 OS=Mus musculus GN=Them5 PE=2 SV=1               |
| 7. <a href="#">AP1S2_MOUSE</a>  | 19145  | 29    | AP-1 complex subunit sigma-2 OS=Mus musculus GN=Ap1s2 PE=2 SV=1                    |
| 8. <a href="#">MCEM1_MOUSE</a>  | 20693  | 29    | Mast cell-expressed membrane protein 1 homolog OS=Mus musculus GN=Mcomp1 PE=2 SV=1 |
| 9. <a href="#">MUTYH_MOUSE</a>  | 58378  | 28    | A/G-specific adenine DNA glycosylase OS=Mus musculus GN=Mutyh PE=2 SV=1            |
| 10. <a href="#">NAR2B_MOUSE</a> | 33354  | 26    | T-cell ecto-ADP-ribosyltransferase 2 OS=Mus musculus GN=Art2b PE=2 SV=1            |

### Results List

1. [MSS4\\_MOUSE](#) Mass: 14248 Score: 101 Expect: 1.3e-006 Matches: 4

Guanine nucleotide exchange factor MSS4 OS=Mus musculus GN=RabifPE=2 SV=1

**Observed Mr(expt) Mr(calc) ppm Start End Miss Ions Peptide**

1007.4878 1006.4805 1006.5270 -46.17 42 - 49 0 --- R.QLFLPSMR.K + Oxidation (M)

1098.5401 1097.5328 1097.5505 -16.15 111 - 119 0 --- K.NSFYVALER.V

1163.5807 1162.5735 1162.6281 -46.99 41 - 49 1 --- R.RQLFLPSMR.K + Oxidation (M)

1188.6346 1187.6273 1187.6663 -32.78 30 - 40 0 49 R.VLQPGTALFSR.R

**No match to:** 842.4617, 856.4699, 868.3781, 874.4405, 976.4259, 990.4526, 999.3938, 1073.5232, 1198.6754, 1213.5130, 1487.6658, 1760.7450, 1864.8827, 1903.7803, 1919.7831

2. LSP1\_MOUSE Mass: 36806 Score: 42 Expect: 1.1 Matches: 2

Lymphocyte-specific protein 1 OS=Mus musculus GN=Lsp1 PE=1 SV=2

**Observed Mr(expt) Mr(calc) ppm Start End Miss Ions Peptide**

842.4617 841.4544 841.4294 29.8 2 - 9 0 28 M.AEAAIDPR.C

874.4405 873.4332 873.4192 16.0 48 - 54 0 --- R.QLDQDK.D

**No match to:** 856.4699, 868.3781, 976.4259, 990.4526, 999.3938, 1007.4878, 1073.5232, 1098.5401, 1163.5807, 1188.6346, 1198.6754, 1213.5130, 1487.6658, 1760.7450, 1864.8827, 1903.7803, 1919.7831

3. MICA2\_MOUSE Mass: 111200 Score: 34 Expect: 5.8 Matches: 2

Protein MICAL-2 OS=Mus musculus GN=Mical2 PE=1 SV=1

**Observed Mr(expt) Mr(calc) ppm Start End Miss Ions Peptide**

842.4617 841.4544 841.4810 -31.58 872 - 878 0 27 K.ALSWPLR.L

874.4405 873.4332 873.4385 -6.04 617 - 622 0 --- K.FYELFR.G

**No match to:** 856.4699, 868.3781, 976.4259, 990.4526, 999.3938, 1007.4878, 1073.5232, 1098.5401, 1163.5807, 1188.6346, 1198.6754, 1213.5130, 1487.6658, 1760.7450, 1864.8827, 1903.7803, 1919.7831

4. SMOCL\_MOUSE Mass: 52298 Score: 33 Expect: 7.9 Matches: 4

SPARC-related modular calcium-binding protein 1 OS=Mus musculus GN=Smocl PE=2 SV=2

**Observed Mr(expt) Mr(calc) ppm Start End Miss Ions Peptide**

842.4617 841.4544 841.4956 -48.94 1 - 7 1 --- -.MLPARVR.L

1007.4878 1006.4805 1006.4607 19.6 310 - 318 0 --- K.SVEADDPFK.D

1163.5807 1162.5735 1162.5619 9.97 440 - 451 0 --- K.EGGSLSGSPQGK.R

1864.8827 1863.8754 1863.9149 -21.20 433 - 451 1 --- K.GCLGVSKEGGSLSGSPQGK.R

**No match to:** 856.4699, 868.3781, 874.4405, 976.4259, 990.4526, 999.3938, 1073.5232, 1098.5401, 1188.6346, 1198.6754, 1213.5130, 1487.6658, 1760.7450, 1903.7803, 1919.7831

5. NSUN5\_MOUSE Mass: 51568 Score: 32 Expect: 9.8 Matches: 3

Putative methyltransferase NSUN5 OS=Mus musculus GN=Nsun5 PE=2 SV=2

**Observed Mr(expt) Mr(calc) ppm Start End Miss Ions Peptide**

1098.5401 1097.5328 1097.5366 -3.48 156 - 164 1 --- K.RQGFYQGR.A

1163.5807 1162.5735 1162.5652 7.08 454 - 465 1 --- R.KAAVGASMQPST.- + Oxidation (M)

1188.6346 1187.6273 1187.6808 -45.05 263 - 273 1 11 K.RLAAMATLVAR.A + Oxidation (M)

**No match to:** 842.4617, 856.4699, 868.3781, 874.4405, 976.4259, 990.4526, 999.3938, 1007.4878, 1073.5232, 1198.6754, 1213.5130, 1487.6658, 1760.7450, 1864.8827, 1903.7803, 1919.7831

6. THEM5\_MOUSE Mass: 28132 Score: 30 Expect: 16 Matches: 2

Thioesterase superfamily member 5 OS=Mus musculus GN=Them5 PE=2 SV=1

**Observed Mr(expt) Mr(calc) ppm Start End Miss Ions Peptide**

842.4617 841.4544 841.4480 7.64 21 - 27 0 13 R.SPCLLP.R.V

1487.6658 1486.6585 1486.6908 -21.71 214 - 225 1 --- K.LYMSCIAQSRDK.Q + Oxidation (M)

**No match to:** 856.4699, 868.3781, 874.4405, 976.4259, 990.4526, 999.3938, 1007.4878, 1073.5232, 1098.5401, 1163.5807, 1188.6346, 1198.6754, 1213.5130, 1760.7450, 1864.8827, 1903.7803, 1919.7831

7. AP1S2\_MOUSE Mass: 19145 Score: 29 Expect: 19 Matches: 2

AP-1 complex subunit sigma-2 OS=Mus musculus GN=Ap1s2 PE=2 SV=1

**Observed Mr(expt) Mr(calc) ppm Start End Miss Ions Peptide**

1007.4878 1006.4805 1006.5124 -31.66 18 - 25 0 --- K.WYVPLSDK.E

1188.6346 1187.6273 1187.5831 37.2 1 - 9 0 10 -.MQFMLLFSR.Q + Oxidation (M)

**No match to:** 842.4617, 856.4699, 868.3781, 874.4405, 976.4259, 990.4526, 999.3938, 1073.5232, 1098.5401, 1163.5807, 1198.6754, 1213.5130, 1487.6658, 1760.7450, 1864.8827, 1903.7803, 1919.7831

8. MCEM1\_MOUSE Mass: 20693 Score: 29 Expect: 21 Matches: 3

Mast cell-expressed membrane protein 1 homolog OS=Mus musculus GN=Mcomp1 PE=2 SV=1

**Observed Mr(expt) Mr(calc) ppm Start End Miss Ions Peptide**

856.4699 855.4626 855.4450 20.5 176 - 183 1 --- K.KAQPQPST.-

990.4526 989.4453 989.4236 21.9 1 - 9 0 --- -.MHASASQDK.N + Oxidation (M)

1188.6346 1187.6273 1187.6510 -19.92 40 - 50 1 --- K.LSQSTPTKQAK.F

**No match to:** 842.4617, 868.3781, 874.4405, 976.4259, 999.3938, 1007.4878, 1073.5232, 1098.5401, 1163.5807, 1198.6754, 1213.5130, 1487.6658, 1760.7450, 1864.8827, 1903.7803, 1919.7831

9. MUTYH\_MOUSE Mass: 58378 Score: 28 Expect: 29 Matches: 2

A/G-specific adenine DNA glycosylase OS=Mus musculus GN=Mutyh PE=2 SV=1

**Observed Mr(expt) Mr(calc) ppm Start End Miss Ions Peptide**

842.4617 841.4544 841.4559 -1.70 80 - 85 1 17 K.RDLPWR.N

976.4259 975.4186 975.4370 -18.79 90 - 97 1 --- K.EEANSDRR.A

**No match to:** 856.4699, 868.3781, 874.4405, 990.4526, 999.3938, 1007.4878, 1073.5232, 1098.5401, 1163.5807, 1188.6346, 1198.6754, 1213.5130, 1487.6658, 1760.7450, 1864.8827, 1903.7803, 1919.7831

10. NAR2B\_MOUSE Mass: 33354 Score: 26 Expect: 40 Matches: 3

T-cell ecto-ADP-ribosyltransferase 2 OS=Mus musculus GN=Art2b PE=2 SV=1

**Observed Mr(expt) Mr(calc) ppm Start End Miss Ions Peptide**

990.4526 989.4453 989.4528 -7.61 150 - 157 0 --- K.VMFEYTGK.G + Oxidation (M)

1007.4878 1006.4805 1006.4508 29.5 116 - 123 0 --- K.SPDNFHYK.A

1188.6346 1187.6273 1187.5823 38.0 162 - 172 0 --- R.FGQFSSSLTK.R

**No match to:** 842.4617, 856.4699, 868.3781, 874.4405, 976.4259, 999.3938, 1073.5232, 1098.5401, 1163.5807, 1198.6754, 1213.5130, 1487.6658, 1760.7450, 1864.8827, 1903.7803, 1919.7831



## Search Parameters

Type of search : MS/MS Ion Search  
Enzyme : Trypsin  
Fixed modifications : Carbamidomethyl (C)  
Variable modifications : Oxidation (M)  
Mass values : Monoisotopic  
Protein Mass : Unrestricted  
Peptide Mass Tolerance :  $\pm 50$  ppm  
Fragment Mass Tolerance:  $\pm 0.6$  Da  
Max Missed Cleavages : 1  
Instrument type : MALDI-TOF-TOF  
Query1 (842.4617,1+) : <no title>  
Query2 (856.4699,1+) : <no title>  
Query3 (868.3781,1+) : <no title>  
Query4 (874.4405,1+) : <no title>  
Query5 (976.4259,1+) : <no title>  
Query6 (990.4526,1+) : <no title>  
Query7 (999.3938,1+) : <no title>  
Query8 (1007.4878,1+) : <no title>  
Query9 (1073.5232,1+) : <no title>  
Query10 (1098.5401,1+) : <no title>  
Query11 (1163.5807,1+) : <no title>  
Query12 (1188.6346,1+) : <no title>  
Query13 (1198.6754,1+) : <no title>  
Query14 (1213.5130,1+) : <no title>  
Query15 (1487.6658,1+) : <no title>  
Query16 (1760.7450,1+) : <no title>  
Query17 (1864.8827,1+) : <no title>  
Query18 (1903.7803,1+) : <no title>  
Query19 (1919.7831,1+) : <no title>

**Mascot:** <http://www.matrixscience.com/>
